# Supplementary material for: Theoretical study on the mechanism and chemoselectivity in gold(i)-catalyzed cycloisomerization of β,β-disubstituted ortho-(alkynyl)styrenes
Source: Royal Society of Chemistry journal article supplement (doi:10.1039/c9qo00534j), 2019-01-01
Supplement: c9qo00534j1.pdf [file c9qo00534j1.pdf]

# Supporting information

## Theoretical Study on the Mechanism and Chemoselectivity in Gold(I)-Catalyzed Cycloisomerization of $\beta,\beta$ - Disubstituted Ortho-(alkynyl)styrenes

*Lin Zhou*<sup>a</sup>, *Li Yang*<sup>a</sup>, *Yanwen Zhang*<sup>a</sup>, *Alexander M. Kirillov*<sup>b,c</sup>, *Ran Fang*<sup>a\*</sup> and *Bing Han*<sup>a\*</sup>

<sup>a</sup>State Key Laboratory of Applied Organic Chemistry and Key Laboratory of Nonferrous Metals Chemistry and Resources Utilization of Gansu Province, College of Chemistry and Chemical Engineering, Lanzhou University, Lanzhou 730000, P. R. China;

<sup>b</sup>Centro de Química Estrutural, Instituto Superior Técnico, Universidade de Lisboa, Av. Rovisco Pais, 1049-001, Lisbon, Portugal.

<sup>c</sup>Peoples' Friendship University of Russia (RUDN University), 6 Miklukho-Maklaya st., Moscow, 117198, Russia

### Table of Contents

|                                                                                              |   |
|----------------------------------------------------------------------------------------------|---|
| 1. The energy profile calculated for the remaining pathway b of Series A.....                | 2 |
| 2. The energy profile calculated for the remaining pathway a of Series B.....                | 3 |
| 3. The energy profile calculated for Series B catalyzed by one molecular PTSA.....           | 4 |
| 4. HOMOs and LUMOs of the four transition states.....                                        | 5 |
| 4. Cartesian coordinates of the stationary points with the self-consistent field energy..... | 6 |

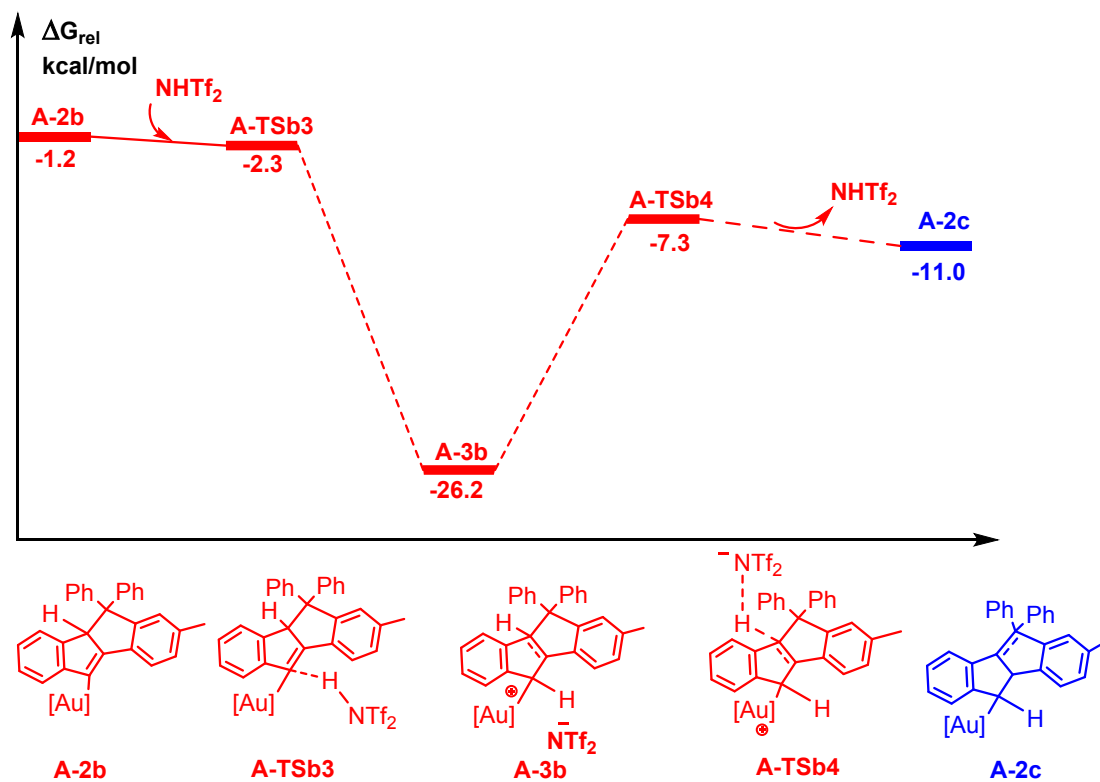

Figure S1 Energy profile calculated for the remaining pathway b of Series A. Relative energies are in kcal/mol.

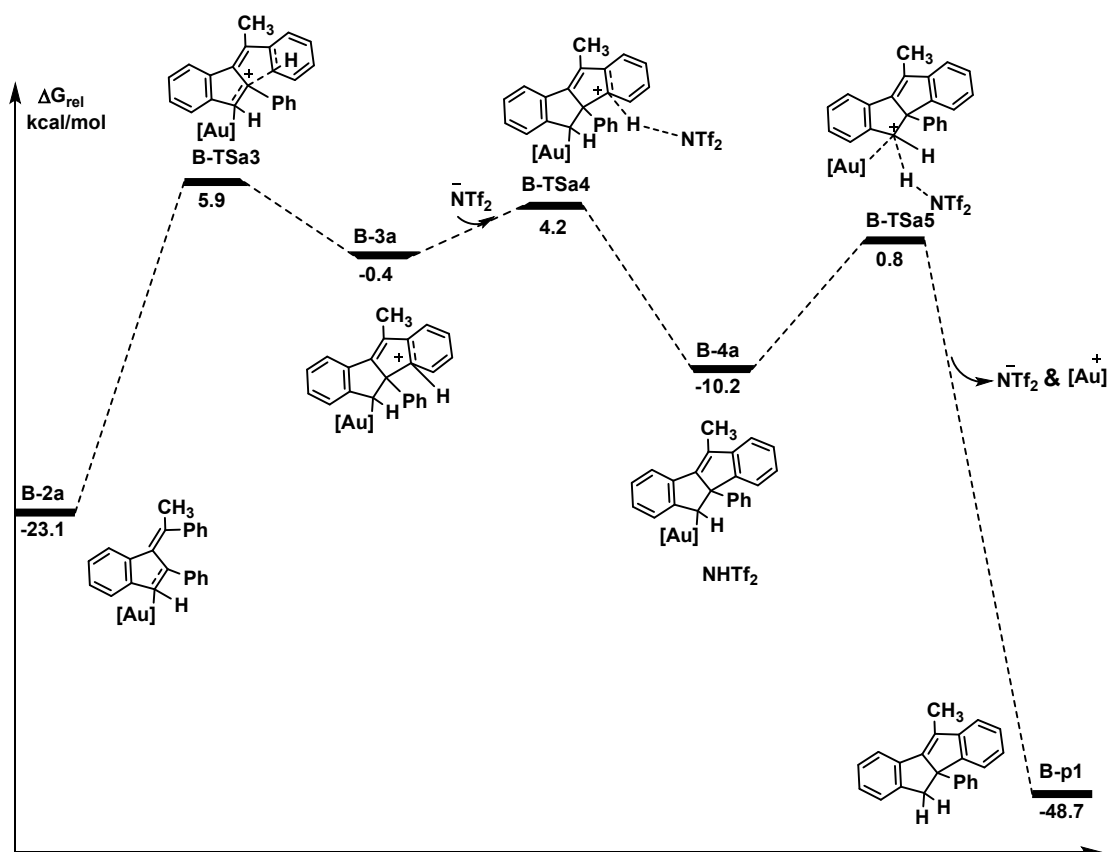

Figure S2 Energy profile calculated for the remaining pathway a of Series **B**. Relative energies are in kcal/mol.

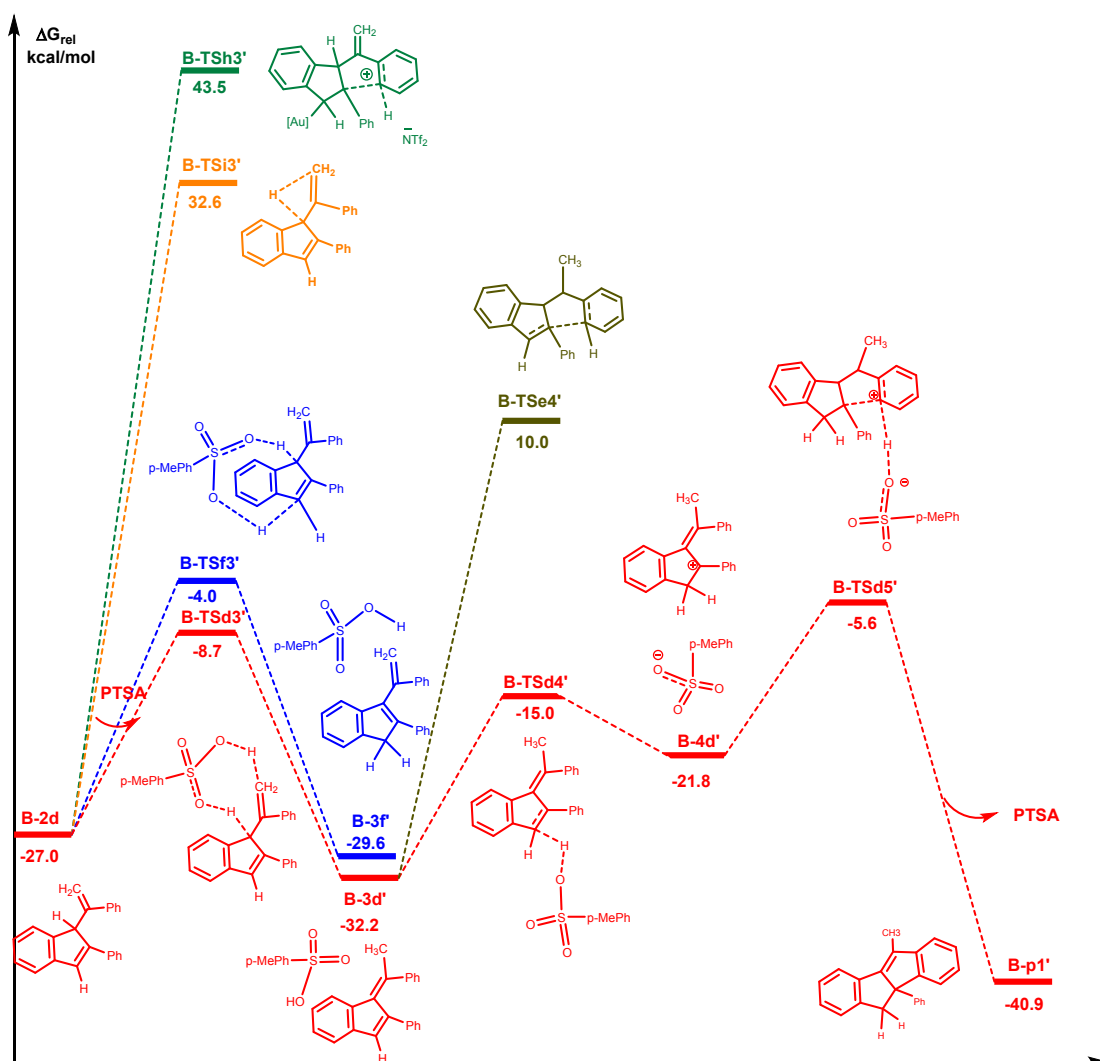

Figure S3 Second part of energy profile calculated for Series **B** catalyzed by one molecular PTSA. Relative energies are in kcal/mol.

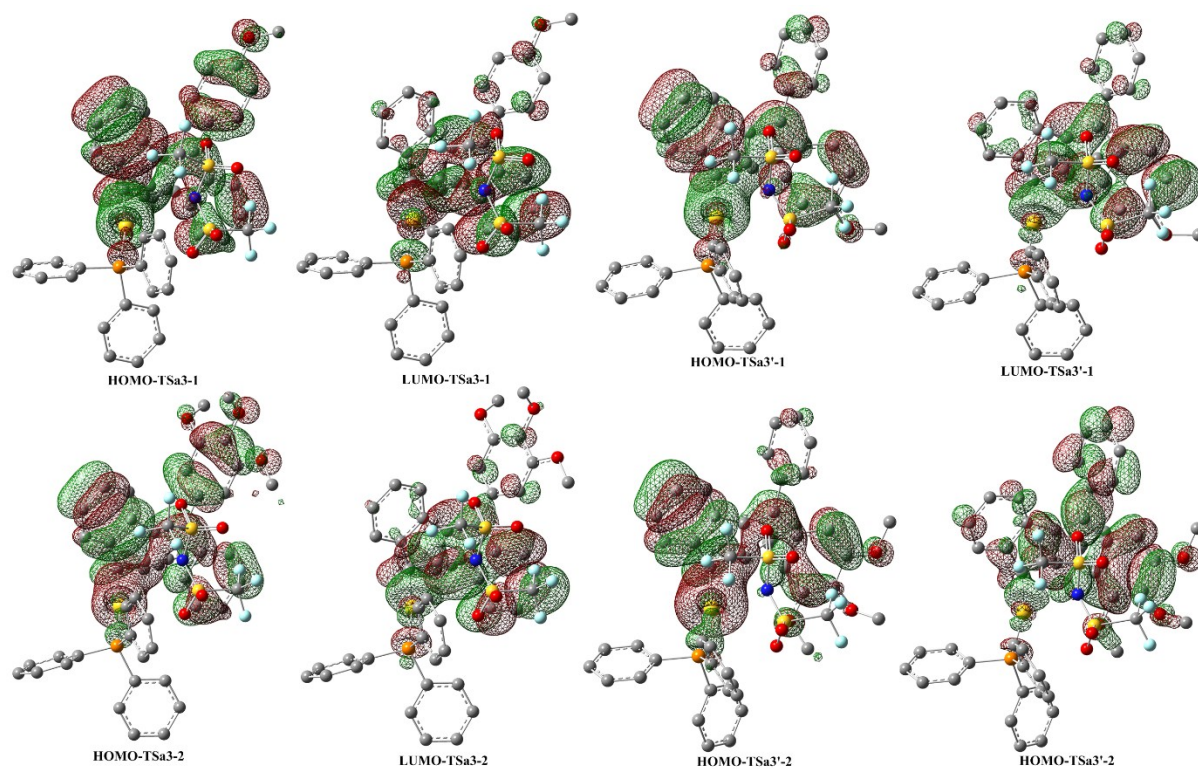

Figure S4. Comparison of the HOMOs and LUMOs of the four transition states **TSa3-1**, **TSa3'-1**, **TSa3-2**, and **TSa3'-2**.

## Optimized cartesian coordinates with the self-consistent field (SCF)

### energies and the imaginary frequencies of transition states

A-re

|   |              |              |              |
|---|--------------|--------------|--------------|
| 6 | 1.377191000  | -4.584752000 | -0.726580000 |
| 6 | 2.480353000  | -3.753754000 | -0.912981000 |
| 6 | 2.333440000  | -2.376091000 | -0.863367000 |
| 6 | 1.087347000  | -1.783621000 | -0.623873000 |
| 6 | -0.034181000 | -2.635896000 | -0.453744000 |
| 6 | 0.129322000  | -4.027397000 | -0.502701000 |
| 1 | 1.490787000  | -5.665226000 | -0.764952000 |
| 1 | 3.460452000  | -4.183266000 | -1.105949000 |
| 1 | 3.197763000  | -1.736936000 | -1.026899000 |
| 1 | -0.744534000 | -4.659012000 | -0.362728000 |
| 6 | 0.881372000  | -0.336298000 | -0.621160000 |
| 6 | 1.733336000  | 0.652558000  | -0.269338000 |
| 6 | -1.323951000 | -2.080945000 | -0.228554000 |
| 6 | -2.406575000 | -1.560164000 | -0.047178000 |
| 6 | -3.645035000 | -0.893387000 | 0.161409000  |
| 6 | -4.851959000 | -1.599963000 | 0.246931000  |
| 6 | -3.672526000 | 0.504843000  | 0.285210000  |
| 6 | -6.045782000 | -0.924251000 | 0.449391000  |
| 1 | -4.838588000 | -2.683308000 | 0.155483000  |
| 6 | -4.871966000 | 1.166283000  | 0.487537000  |
| 1 | -2.737361000 | 1.058357000  | 0.222878000  |
| 6 | -6.078965000 | 0.466099000  | 0.570394000  |
| 1 | -6.976983000 | -1.485311000 | 0.516803000  |
| 1 | -4.878469000 | 2.251142000  | 0.585937000  |
| 1 | -0.115318000 | -0.032041000 | -0.944152000 |
| 6 | 3.049443000  | 0.400504000  | 0.367234000  |
| 6 | 4.219400000  | 0.924711000  | -0.192438000 |
| 6 | 3.145137000  | -0.352411000 | 1.541408000  |
| 6 | 5.456930000  | 0.671338000  | 0.386262000  |
| 1 | 4.150642000  | 1.527907000  | -1.096278000 |
| 6 | 4.381558000  | -0.597933000 | 2.125359000  |
| 1 | 2.236112000  | -0.748889000 | 1.989421000  |
| 6 | 5.541501000  | -0.092920000 | 1.546065000  |
| 1 | 6.359146000  | 1.074595000  | -0.067988000 |
| 1 | 4.439060000  | -1.185318000 | 3.038828000  |
| 1 | 6.509396000  | -0.287458000 | 2.002122000  |
| 6 | 1.343680000  | 2.065494000  | -0.468981000 |
| 6 | 0.527547000  | 2.451669000  | -1.540973000 |
| 6 | 1.776237000  | 3.057446000  | 0.421465000  |

|                                              |              |             |                             |
|----------------------------------------------|--------------|-------------|-----------------------------|
| 6                                            | 0.137966000  | 3.774476000 | -1.701507000                |
| 1                                            | 0.219798000  | 1.705796000 | -2.270891000                |
| 6                                            | 1.385477000  | 4.380088000 | 0.261358000                 |
| 1                                            | 2.415230000  | 2.779210000 | 1.257081000                 |
| 6                                            | 0.563476000  | 4.745028000 | -0.799898000                |
| 1                                            | -0.488232000 | 4.051849000 | -2.546490000                |
| 1                                            | 1.725732000  | 5.130617000 | 0.971223000                 |
| 1                                            | 0.263922000  | 5.782278000 | -0.929696000                |
| 6                                            | -7.374431000 | 1.194384000 | 0.762036000                 |
| 1                                            | -7.262303000 | 2.038979000 | 1.450945000                 |
| 1                                            | -7.746630000 | 1.601746000 | -0.186895000                |
| 1                                            | -8.151672000 | 0.533466000 | 1.159472000                 |
| Zero-point correction=                       |              |             | 0.412640 (Hartree/Particle) |
| Thermal correction to Energy=                |              |             | 0.437113                    |
| Thermal correction to Enthalpy=              |              |             | 0.438057                    |
| Thermal correction to Gibbs Free Energy=     |              |             | 0.355204                    |
| Sum of electronic and zero-point Energies=   |              |             | -1117.028278                |
| Sum of electronic and thermal Energies=      |              |             | -1117.003805                |
| Sum of electronic and thermal Enthalpies=    |              |             | -1117.002861                |
| Sum of electronic and thermal Free Energies= |              |             | -1117.085714                |

#### A-1

|   |              |              |              |
|---|--------------|--------------|--------------|
| 6 | -1.185452000 | 4.356516000  | 0.155773000  |
| 6 | -2.475242000 | 4.518168000  | -0.350747000 |
| 6 | -3.252607000 | 3.414030000  | -0.671747000 |
| 6 | -2.768014000 | 2.114674000  | -0.497242000 |
| 6 | -1.461434000 | 1.963433000  | 0.029824000  |
| 6 | -0.678587000 | 3.081510000  | 0.345319000  |
| 1 | -0.581472000 | 5.224645000  | 0.404695000  |
| 1 | -2.875567000 | 5.517245000  | -0.503114000 |
| 1 | -4.252770000 | 3.547476000  | -1.078082000 |
| 1 | 0.319947000  | 2.937247000  | 0.759394000  |
| 6 | -3.521754000 | 0.917283000  | -0.873218000 |
| 6 | -4.809471000 | 0.608354000  | -0.605672000 |
| 6 | -1.010585000 | 0.624747000  | 0.268625000  |
| 6 | -1.018491000 | -0.596316000 | 0.500633000  |
| 6 | -1.210095000 | -1.990221000 | 0.731711000  |
| 6 | -0.274687000 | -2.769728000 | 1.426382000  |
| 6 | -2.394099000 | -2.586008000 | 0.260525000  |
| 6 | -0.517225000 | -4.118645000 | 1.632918000  |
| 1 | 0.635545000  | -2.309022000 | 1.810020000  |
| 6 | -2.623110000 | -3.930951000 | 0.489427000  |
| 1 | -3.133574000 | -1.987001000 | -0.269527000 |
| 6 | -1.690886000 | -4.722075000 | 1.171959000  |

|    |              |              |              |
|----|--------------|--------------|--------------|
| 1  | 0.212068000  | -4.718199000 | 2.174900000  |
| 1  | -3.548719000 | -4.378449000 | 0.128568000  |
| 1  | -2.934093000 | 0.163339000  | -1.401000000 |
| 6  | -5.693787000 | 1.451472000  | 0.230271000  |
| 6  | -6.982216000 | 1.767421000  | -0.216686000 |
| 6  | -5.273151000 | 1.934295000  | 1.474136000  |
| 6  | -7.815217000 | 2.576896000  | 0.545676000  |
| 1  | -7.324236000 | 1.378035000  | -1.174311000 |
| 6  | -6.111700000 | 2.733524000  | 2.241303000  |
| 1  | -4.283768000 | 1.667699000  | 1.842735000  |
| 6  | -7.381219000 | 3.063229000  | 1.775546000  |
| 1  | -8.808930000 | 2.824995000  | 0.180856000  |
| 1  | -5.775011000 | 3.095858000  | 3.209688000  |
| 1  | -8.035902000 | 3.690280000  | 2.375782000  |
| 6  | -5.342201000 | -0.682918000 | -1.094606000 |
| 6  | -4.971727000 | -1.198001000 | -2.344158000 |
| 6  | -6.162480000 | -1.460567000 | -0.266094000 |
| 6  | -5.384690000 | -2.463730000 | -2.740842000 |
| 1  | -4.369846000 | -0.586708000 | -3.014263000 |
| 6  | -6.570071000 | -2.728638000 | -0.661579000 |
| 1  | -6.464172000 | -1.068724000 | 0.703461000  |
| 6  | -6.179511000 | -3.236244000 | -1.898128000 |
| 1  | -5.096194000 | -2.843755000 | -3.717996000 |
| 1  | -7.198688000 | -3.322733000 | -0.002435000 |
| 1  | -6.507715000 | -4.224341000 | -2.211746000 |
| 6  | -1.952759000 | -6.178354000 | 1.394359000  |
| 1  | -2.943403000 | -6.339518000 | 1.834386000  |
| 1  | -1.932058000 | -6.731162000 | 0.447197000  |
| 1  | -1.209448000 | -6.627176000 | 2.059806000  |
| 79 | 1.193130000  | 0.136363000  | 0.130676000  |
| 15 | 3.523385000  | 0.173666000  | -0.110481000 |
| 6  | 4.029992000  | 0.463098000  | -1.826311000 |
| 6  | 4.242157000  | -1.407214000 | 0.408868000  |
| 6  | 4.272485000  | 1.483684000  | 0.893557000  |
| 6  | 5.069712000  | -0.261175000 | -2.413487000 |
| 6  | 3.382203000  | 1.473041000  | -2.546012000 |
| 6  | 5.469598000  | -1.468053000 | 1.073834000  |
| 6  | 3.559669000  | -2.585264000 | 0.087271000  |
| 6  | 5.417381000  | 2.157824000  | 0.458598000  |
| 6  | 3.713640000  | 1.783887000  | 2.140304000  |
| 6  | 5.455826000  | 0.026576000  | -3.719014000 |
| 1  | 5.574005000  | -1.048550000 | -1.855522000 |
| 6  | 3.777375000  | 1.758490000  | -3.845859000 |
| 1  | 2.569082000  | 2.035804000  | -2.084837000 |



|                                              |             |              |                             |
|----------------------------------------------|-------------|--------------|-----------------------------|
| 6                                            | 6.006968000 | -2.705412000 | 1.413754000                 |
| 1                                            | 6.002529000 | -0.553221000 | 1.328796000                 |
| 6                                            | 4.103087000 | -3.817053000 | 0.428217000                 |
| 1                                            | 2.601353000 | -2.535738000 | -0.432367000                |
| 6                                            | 5.998441000 | 3.124158000  | 1.272406000                 |
| 1                                            | 5.850778000 | 1.931242000  | -0.514545000                |
| 6                                            | 4.301138000 | 2.748613000  | 2.949092000                 |
| 1                                            | 2.819511000 | 1.257606000  | 2.476815000                 |
| 6                                            | 4.812229000 | 1.032758000  | -4.432054000                |
| 1                                            | 6.261698000 | -0.538341000 | -4.180097000                |
| 1                                            | 3.274219000 | 2.542758000  | -4.405137000                |
| 6                                            | 5.325840000 | -3.875620000 | 1.092913000                 |
| 1                                            | 6.959949000 | -2.754628000 | 1.933984000                 |
| 1                                            | 3.570832000 | -4.731252000 | 0.178176000                 |
| 6                                            | 5.441648000 | 3.418461000  | 2.513648000                 |
| 1                                            | 6.886740000 | 3.651355000  | 0.934521000                 |
| 1                                            | 3.866426000 | 2.981457000  | 3.917551000                 |
| 1                                            | 5.115484000 | 1.252081000  | -5.452562000                |
| 1                                            | 5.748800000 | -4.839273000 | 1.365015000                 |
| 1                                            | 5.897043000 | 4.177316000  | 3.144689000                 |
| Zero-point correction=                       |             |              | 0.688277 (Hartree/Particle) |
| Thermal correction to Energy=                |             |              | 0.732600                    |
| Thermal correction to Enthalpy=              |             |              | 0.733544                    |
| Thermal correction to Gibbs Free Energy=     |             |              | 0.602941                    |
| Sum of electronic and zero-point Energies=   |             |              | -2287.755847                |
| Sum of electronic and thermal Energies=      |             |              | -2287.711524                |
| Sum of electronic and thermal Enthalpies=    |             |              | -2287.710580                |
| Sum of electronic and thermal Free Energies= |             |              | -2287.841183                |

#### A-TS1

|   |              |              |              |
|---|--------------|--------------|--------------|
| 6 | 1.408916000  | -4.866002000 | -1.324381000 |
| 6 | 2.788677000  | -4.846014000 | -1.517641000 |
| 6 | 3.490683000  | -3.642961000 | -1.495353000 |
| 6 | 2.804591000  | -2.454460000 | -1.275619000 |
| 6 | 1.411564000  | -2.478273000 | -1.060239000 |
| 6 | 0.714648000  | -3.683816000 | -1.093105000 |
| 1 | 0.873586000  | -5.811634000 | -1.348223000 |
| 1 | 3.322876000  | -5.776804000 | -1.690695000 |
| 1 | 4.567895000  | -3.628323000 | -1.648128000 |
| 1 | -0.361162000 | -3.691651000 | -0.926393000 |
| 6 | 3.413048000  | -1.111936000 | -1.288084000 |
| 6 | 4.350865000  | -0.620639000 | -0.401273000 |
| 6 | 0.855501000  | -1.169614000 | -0.756030000 |
| 6 | 1.620133000  | -0.122705000 | -0.642943000 |

|    |              |              |              |
|----|--------------|--------------|--------------|
| 6  | 1.843097000  | 1.240576000  | -0.293908000 |
| 6  | 1.757193000  | 1.631853000  | 1.053991000  |
| 6  | 2.176830000  | 2.201484000  | -1.264475000 |
| 6  | 1.972905000  | 2.954338000  | 1.409582000  |
| 1  | 1.511619000  | 0.882421000  | 1.805196000  |
| 6  | 2.408790000  | 3.512970000  | -0.892375000 |
| 1  | 2.247802000  | 1.901510000  | -2.308058000 |
| 6  | 2.311937000  | 3.911262000  | 0.446952000  |
| 1  | 1.894215000  | 3.253248000  | 2.453602000  |
| 1  | 2.678276000  | 4.249414000  | -1.648079000 |
| 1  | 3.303942000  | -0.566166000 | -2.231494000 |
| 6  | 4.662591000  | -1.280596000 | 0.873851000  |
| 6  | 5.991882000  | -1.320176000 | 1.322483000  |
| 6  | 3.665901000  | -1.874791000 | 1.662473000  |
| 6  | 6.317969000  | -1.956934000 | 2.512035000  |
| 1  | 6.772263000  | -0.863495000 | 0.717363000  |
| 6  | 3.993496000  | -2.491494000 | 2.861124000  |
| 1  | 2.626757000  | -1.823777000 | 1.344971000  |
| 6  | 5.319168000  | -2.540656000 | 3.285513000  |
| 1  | 7.354171000  | -1.994262000 | 2.837672000  |
| 1  | 3.209862000  | -2.934227000 | 3.470576000  |
| 1  | 5.572547000  | -3.030512000 | 4.222344000  |
| 6  | 5.004393000  | 0.658211000  | -0.697966000 |
| 6  | 5.342105000  | 1.017639000  | -2.013601000 |
| 6  | 5.256689000  | 1.576237000  | 0.335006000  |
| 6  | 5.907599000  | 2.254585000  | -2.287167000 |
| 1  | 5.197625000  | 0.299798000  | -2.818770000 |
| 6  | 5.799737000  | 2.822069000  | 0.055261000  |
| 1  | 4.991481000  | 1.315047000  | 1.357366000  |
| 6  | 6.130496000  | 3.162593000  | -1.254270000 |
| 1  | 6.186258000  | 2.507998000  | -3.306751000 |
| 1  | 5.971389000  | 3.529580000  | 0.863040000  |
| 1  | 6.573796000  | 4.131979000  | -1.469219000 |
| 6  | 2.571518000  | 5.335043000  | 0.826227000  |
| 1  | 3.523338000  | 5.685840000  | 0.409424000  |
| 1  | 1.792238000  | 5.998285000  | 0.430894000  |
| 1  | 2.605193000  | 5.468063000  | 1.911565000  |
| 79 | -1.141465000 | -0.623377000 | -0.400195000 |
| 15 | -3.339687000 | 0.099664000  | 0.080829000  |
| 6  | -4.201494000 | 0.793164000  | -1.359878000 |
| 6  | -3.302007000 | 1.416233000  | 1.335347000  |
| 6  | -4.412793000 | -1.207425000 | 0.743663000  |
| 6  | -5.031877000 | 1.911814000  | -1.251155000 |
| 6  | -4.053093000 | 0.151765000  | -2.593681000 |

|                                              |              |              |                             |
|----------------------------------------------|--------------|--------------|-----------------------------|
| 6                                            | -4.268753000 | 1.502661000  | 2.339820000                 |
| 6                                            | -2.290093000 | 2.379375000  | 1.257686000                 |
| 6                                            | -5.771384000 | -1.278557000 | 0.425425000                 |
| 6                                            | -3.856302000 | -2.130276000 | 1.635161000                 |
| 6                                            | -5.707784000 | 2.382049000  | -2.372323000                |
| 1                                            | -5.149835000 | 2.414691000  | -0.292401000                |
| 6                                            | -4.735614000 | 0.622355000  | -3.708286000                |
| 1                                            | -3.400373000 | -0.717595000 | -2.677541000                |
| 6                                            | -4.221193000 | 2.546673000  | 3.258327000                 |
| 1                                            | -5.056005000 | 0.753118000  | 2.406558000                 |
| 6                                            | -2.250187000 | 3.421782000  | 2.174897000                 |
| 1                                            | -1.533135000 | 2.309588000  | 0.474469000                 |
| 6                                            | -6.563963000 | -2.268369000 | 0.997986000                 |
| 1                                            | -6.209064000 | -0.564201000 | -0.270182000                |
| 6                                            | -4.653831000 | -3.112859000 | 2.207752000                 |
| 1                                            | -2.795140000 | -2.073546000 | 1.880045000                 |
| 6                                            | -5.560298000 | 1.739138000  | -3.597400000                |
| 1                                            | -6.350876000 | 3.254350000  | -2.288466000                |
| 1                                            | -4.618566000 | 0.122759000  | -4.666496000                |
| 6                                            | -3.214955000 | 3.504050000  | 3.176232000                 |
| 1                                            | -4.972681000 | 2.611713000  | 4.040978000                 |
| 1                                            | -1.461498000 | 4.167894000  | 2.110233000                 |
| 6                                            | -6.007194000 | -3.182641000 | 1.886693000                 |
| 1                                            | -7.620006000 | -2.325324000 | 0.747000000                 |
| 1                                            | -4.219521000 | -3.828556000 | 2.901063000                 |
| 1                                            | -6.088543000 | 2.111127000  | -4.471688000                |
| 1                                            | -3.180314000 | 4.316750000  | 3.897478000                 |
| 1                                            | -6.630025000 | -3.955613000 | 2.329701000                 |
| Zero-point correction=                       |              |              | 0.688639 (Hartree/Particle) |
| Thermal correction to Energy=                |              |              | 0.731472                    |
| Thermal correction to Enthalpy=              |              |              | 0.732417                    |
| Thermal correction to Gibbs Free Energy=     |              |              | 0.607167                    |
| Sum of electronic and zero-point Energies=   |              |              | -2287.749880                |
| Sum of electronic and thermal Energies=      |              |              | -2287.707047                |
| Sum of electronic and thermal Enthalpies=    |              |              | -2287.706102                |
| Sum of electronic and thermal Free Energies= |              |              | -2287.831352                |

### A-TS2

|   |              |             |             |
|---|--------------|-------------|-------------|
| 6 | -1.471214000 | 5.100677000 | 0.201438000 |
| 6 | -2.823878000 | 5.311855000 | 0.489567000 |
| 6 | -3.659232000 | 4.228534000 | 0.673892000 |
| 6 | -3.185292000 | 2.910873000 | 0.500816000 |
| 6 | -1.801108000 | 2.696727000 | 0.236972000 |
| 6 | -0.968088000 | 3.813032000 | 0.103618000 |

|   |              |              |              |
|---|--------------|--------------|--------------|
| 1 | -0.803416000 | 5.950036000  | 0.083923000  |
| 1 | -3.211637000 | 6.321929000  | 0.587797000  |
| 1 | -4.711068000 | 4.379719000  | 0.909491000  |
| 1 | 0.093773000  | 3.650283000  | -0.072462000 |
| 6 | -4.052621000 | 1.814966000  | 0.757774000  |
| 6 | -4.021592000 | 0.525408000  | 0.198213000  |
| 6 | -1.276923000 | 1.352252000  | 0.251273000  |
| 6 | -1.955432000 | 0.230043000  | 0.342199000  |
| 6 | -1.669550000 | -1.169015000 | 0.105353000  |
| 6 | -1.931853000 | -2.150854000 | 1.067975000  |
| 6 | -1.013358000 | -1.549116000 | -1.085103000 |
| 6 | -1.536239000 | -3.466110000 | 0.855614000  |
| 1 | -2.435407000 | -1.877320000 | 1.990667000  |
| 6 | -0.615305000 | -2.856788000 | -1.282096000 |
| 1 | -0.825656000 | -0.791368000 | -1.845464000 |
| 6 | -0.868700000 | -3.840141000 | -0.312023000 |
| 1 | -1.736400000 | -4.217473000 | 1.617584000  |
| 1 | -0.092547000 | -3.131916000 | -2.197613000 |
| 1 | -4.789533000 | 1.979984000  | 1.547938000  |
| 6 | -4.817352000 | -0.453524000 | 1.004646000  |
| 6 | -5.886999000 | -1.182571000 | 0.475040000  |
| 6 | -4.565332000 | -0.548179000 | 2.380755000  |
| 6 | -6.664493000 | -1.994705000 | 1.293489000  |
| 1 | -6.132477000 | -1.095223000 | -0.580284000 |
| 6 | -5.338667000 | -1.362158000 | 3.197764000  |
| 1 | -3.735900000 | 0.017785000  | 2.806721000  |
| 6 | -6.391194000 | -2.092817000 | 2.653521000  |
| 1 | -7.497496000 | -2.545492000 | 0.863903000  |
| 1 | -5.120136000 | -1.425443000 | 4.260878000  |
| 1 | -6.999901000 | -2.731236000 | 3.288718000  |
| 6 | -3.947874000 | 0.327384000  | -1.295382000 |
| 6 | -3.958779000 | 1.407547000  | -2.188314000 |
| 6 | -3.927392000 | -0.968088000 | -1.831094000 |
| 6 | -3.922807000 | 1.198259000  | -3.560114000 |
| 1 | -4.014329000 | 2.425979000  | -1.812919000 |
| 6 | -3.906933000 | -1.176477000 | -3.204062000 |
| 1 | -3.914615000 | -1.830140000 | -1.168117000 |
| 6 | -3.894507000 | -0.094098000 | -4.076412000 |
| 1 | -3.937070000 | 2.054085000  | -4.230274000 |
| 1 | -3.895169000 | -2.192952000 | -3.589716000 |
| 1 | -3.876587000 | -0.254432000 | -5.151354000 |
| 6 | -0.412004000 | -5.247079000 | -0.533149000 |
| 1 | -0.890176000 | -5.685210000 | -1.417436000 |
| 1 | 0.670385000  | -5.283014000 | -0.709481000 |

|                                              |              |              |                             |
|----------------------------------------------|--------------|--------------|-----------------------------|
| 1                                            | -0.639075000 | -5.887825000 | 0.324154000                 |
| 79                                           | 0.787730000  | 0.864731000  | 0.268416000                 |
| 15                                           | 2.991734000  | 0.040465000  | 0.100356000                 |
| 6                                            | 3.285032000  | -0.573779000 | -1.587311000                |
| 6                                            | 3.237875000  | -1.397786000 | 1.187210000                 |
| 6                                            | 4.324489000  | 1.208476000  | 0.489739000                 |
| 6                                            | 4.082802000  | -1.696453000 | -1.827816000                |
| 6                                            | 2.707462000  | 0.109724000  | -2.661988000                |
| 6                                            | 4.422331000  | -1.599227000 | 1.898524000                 |
| 6                                            | 2.208950000  | -2.343412000 | 1.262675000                 |
| 6                                            | 5.514199000  | 1.249638000  | -0.240680000                |
| 6                                            | 4.153322000  | 2.047405000  | 1.596012000                 |
| 6                                            | 4.301582000  | -2.125175000 | -3.132743000                |
| 1                                            | 4.531526000  | -2.236344000 | -0.994838000                |
| 6                                            | 2.931168000  | -0.321312000 | -3.964322000                |
| 1                                            | 2.078651000  | 0.980595000  | -2.473580000                |
| 6                                            | 4.573820000  | -2.742928000 | 2.677807000                 |
| 1                                            | 5.224890000  | -0.865217000 | 1.844798000                 |
| 6                                            | 2.368900000  | -3.484463000 | 2.037563000                 |
| 1                                            | 1.282746000  | -2.185807000 | 0.706746000                 |
| 6                                            | 6.525342000  | 2.127471000  | 0.137411000                 |
| 1                                            | 5.649651000  | 0.599714000  | -1.103561000                |
| 6                                            | 5.170117000  | 2.914637000  | 1.973748000                 |
| 1                                            | 3.221869000  | 2.014876000  | 2.162139000                 |
| 6                                            | 3.726019000  | -1.440131000 | -4.198851000                |
| 1                                            | 4.922547000  | -2.998052000 | -3.317559000                |
| 1                                            | 2.480658000  | 0.213271000  | -4.796735000                |
| 6                                            | 3.551470000  | -3.683348000 | 2.747102000                 |
| 1                                            | 5.495416000  | -2.898001000 | 3.232983000                 |
| 1                                            | 1.565928000  | -4.216921000 | 2.096224000                 |
| 6                                            | 6.354571000  | 2.955949000  | 1.241984000                 |
| 1                                            | 7.449445000  | 2.163506000  | -0.433771000                |
| 1                                            | 5.037237000  | 3.563766000  | 2.835307000                 |
| 1                                            | 3.896710000  | -1.780252000 | -5.217239000                |
| 1                                            | 3.674375000  | -4.573172000 | 3.359326000                 |
| 1                                            | 7.147670000  | 3.639864000  | 1.533498000                 |
| Zero-point correction=                       |              |              | 0.688303 (Hartree/Particle) |
| Thermal correction to Energy=                |              |              | 0.730974                    |
| Thermal correction to Enthalpy=              |              |              | 0.731919                    |
| Thermal correction to Gibbs Free Energy=     |              |              | 0.608524                    |
| Sum of electronic and zero-point Energies=   |              |              | -2287.723035                |
| Sum of electronic and thermal Energies=      |              |              | -2287.680363                |
| Sum of electronic and thermal Enthalpies=    |              |              | -2287.679419                |
| Sum of electronic and thermal Free Energies= |              |              | -2287.802813                |

**A-TS3**

|   |              |              |              |
|---|--------------|--------------|--------------|
| 6 | -0.449601000 | -4.370717000 | -0.685315000 |
| 6 | -1.273647000 | -5.155044000 | 0.148439000  |
| 6 | -2.312483000 | -4.583387000 | 0.849534000  |
| 6 | -2.548480000 | -3.201225000 | 0.705895000  |
| 6 | -1.665475000 | -2.402259000 | -0.064626000 |
| 6 | -0.649176000 | -3.009815000 | -0.817787000 |
| 1 | 0.372628000  | -4.844405000 | -1.216142000 |
| 1 | -1.088923000 | -6.223011000 | 0.226922000  |
| 1 | -2.970417000 | -5.186257000 | 1.470946000  |
| 1 | -0.002854000 | -2.405360000 | -1.449913000 |
| 6 | -3.581796000 | -2.422881000 | 1.263153000  |
| 6 | -3.865777000 | -1.172727000 | 0.651016000  |
| 6 | -1.923817000 | -1.002277000 | 0.028397000  |
| 6 | -1.365636000 | 0.159610000  | -0.164730000 |
| 6 | -1.829188000 | 1.529782000  | -0.410679000 |
| 6 | -1.796950000 | 2.025346000  | -1.720017000 |
| 6 | -2.278546000 | 2.363851000  | 0.618790000  |
| 6 | -2.264072000 | 3.303310000  | -1.996144000 |
| 1 | -1.434157000 | 1.385359000  | -2.523322000 |
| 6 | -2.743566000 | 3.638861000  | 0.326230000  |
| 1 | -2.289303000 | 2.001725000  | 1.644580000  |
| 6 | -2.751308000 | 4.131127000  | -0.981798000 |
| 1 | -2.251736000 | 3.668541000  | -3.022183000 |
| 1 | -3.113513000 | 4.267978000  | 1.135394000  |
| 1 | -4.042641000 | -2.686669000 | 2.215379000  |
| 6 | -4.377101000 | -1.123642000 | -0.764931000 |
| 6 | -4.768924000 | -2.289328000 | -1.436186000 |
| 6 | -4.506896000 | 0.102196000  | -1.430729000 |
| 6 | -5.243028000 | -2.231310000 | -2.739241000 |
| 1 | -4.720949000 | -3.250667000 | -0.930165000 |
| 6 | -4.984576000 | 0.157007000  | -2.734348000 |
| 1 | -4.231325000 | 1.023388000  | -0.925821000 |
| 6 | -5.346648000 | -1.009233000 | -3.398583000 |
| 1 | -5.551490000 | -3.147266000 | -3.237126000 |
| 1 | -5.067493000 | 1.122299000  | -3.228800000 |
| 1 | -5.722470000 | -0.967261000 | -4.417592000 |
| 6 | -4.311221000 | -0.130742000 | 1.614393000  |
| 6 | -3.565936000 | 0.028559000  | 2.792363000  |
| 6 | -5.460950000 | 0.647538000  | 1.438259000  |
| 6 | -3.942667000 | 0.952772000  | 3.756916000  |
| 1 | -2.655267000 | -0.556652000 | 2.923578000  |
| 6 | -5.833229000 | 1.578643000  | 2.400084000  |

|    |              |              |              |
|----|--------------|--------------|--------------|
| 1  | -6.076109000 | 0.513509000  | 0.552496000  |
| 6  | -5.074617000 | 1.739060000  | 3.556065000  |
| 1  | -3.348783000 | 1.068834000  | 4.660015000  |
| 1  | -6.729430000 | 2.175241000  | 2.250424000  |
| 1  | -5.369684000 | 2.470856000  | 4.303902000  |
| 6  | -3.243396000 | 5.515660000  | -1.274376000 |
| 1  | -4.206265000 | 5.709815000  | -0.788225000 |
| 1  | -2.541684000 | 6.273066000  | -0.903525000 |
| 1  | -3.368327000 | 5.680927000  | -2.349039000 |
| 79 | 0.748701000  | 0.080114000  | -0.043048000 |
| 15 | 3.107339000  | 0.154384000  | 0.042713000  |
| 6  | 3.741364000  | 0.459742000  | 1.716515000  |
| 6  | 3.787082000  | 1.449233000  | -1.032694000 |
| 6  | 3.864899000  | -1.407366000 | -0.502654000 |
| 6  | 4.861560000  | 1.262302000  | 1.944524000  |
| 6  | 3.112884000  | -0.181994000 | 2.788759000  |
| 6  | 5.052655000  | 1.318751000  | -1.613608000 |
| 6  | 3.039009000  | 2.611522000  | -1.243820000 |
| 6  | 4.860127000  | -2.045739000 | 0.239250000  |
| 6  | 3.437046000  | -1.959583000 | -1.715437000 |
| 6  | 5.347736000  | 1.418246000  | 3.238726000  |
| 1  | 5.352698000  | 1.766297000  | 1.113832000  |
| 6  | 3.607704000  | -0.028750000 | 4.077574000  |
| 1  | 2.237368000  | -0.806352000 | 2.607163000  |
| 6  | 5.564718000  | 2.348918000  | -2.394123000 |
| 1  | 5.635654000  | 0.412057000  | -1.455854000 |
| 6  | 3.558307000  | 3.639275000  | -2.022160000 |
| 1  | 2.046396000  | 2.709184000  | -0.801879000 |
| 6  | 5.420148000  | -3.231001000 | -0.229989000 |
| 1  | 5.198480000  | -1.619479000 | 1.182261000  |
| 6  | 4.003971000  | -3.138247000 | -2.181611000 |
| 1  | 2.665772000  | -1.454144000 | -2.298657000 |
| 6  | 4.723924000  | 0.773507000  | 4.301941000  |
| 1  | 6.216770000  | 2.046356000  | 3.416394000  |
| 1  | 3.119075000  | -0.530098000 | 4.909129000  |
| 6  | 4.818856000  | 3.506873000  | -2.597095000 |
| 1  | 6.547304000  | 2.245848000  | -2.847416000 |
| 1  | 2.975018000  | 4.541452000  | -2.186510000 |
| 6  | 4.994163000  | -3.775776000 | -1.436053000 |
| 1  | 6.194630000  | -3.727305000 | 0.349121000  |
| 1  | 3.675422000  | -3.560765000 | -3.128020000 |
| 1  | 5.107594000  | 0.898398000  | 5.311368000  |
| 1  | 5.220921000  | 4.308563000  | -3.211379000 |
| 1  | 5.434924000  | -4.700618000 | -1.799804000 |

|                                              |                             |
|----------------------------------------------|-----------------------------|
| Zero-point correction=                       | 0.687958 (Hartree/Particle) |
| Thermal correction to Energy=                | 0.730923                    |
| Thermal correction to Enthalpy=              | 0.731867                    |
| Thermal correction to Gibbs Free Energy=     | 0.606774                    |
| Sum of electronic and zero-point Energies=   | -2287.718745                |
| Sum of electronic and thermal Energies=      | -2287.675780                |
| Sum of electronic and thermal Enthalpies=    | -2287.674836                |
| Sum of electronic and thermal Free Energies= | -2287.799929                |

**A-2**

|   |              |              |              |
|---|--------------|--------------|--------------|
| 6 | 2.607414000  | 4.149153000  | 2.435745000  |
| 6 | 1.701703000  | 3.257141000  | 1.891885000  |
| 6 | 2.128449000  | 1.944687000  | 1.630734000  |
| 6 | 3.462046000  | 1.545453000  | 1.904636000  |
| 6 | 4.368823000  | 2.448386000  | 2.429898000  |
| 6 | 3.922164000  | 3.742015000  | 2.704707000  |
| 1 | 2.307849000  | 5.168710000  | 2.660614000  |
| 1 | 0.676558000  | 3.547442000  | 1.669173000  |
| 1 | 5.398227000  | 2.164244000  | 2.635122000  |
| 1 | 4.614969000  | 4.457870000  | 3.141278000  |
| 6 | 1.409103000  | 0.879350000  | 1.028094000  |
| 6 | 2.301169000  | -0.271381000 | 0.915207000  |
| 6 | 3.645155000  | 0.150618000  | 1.451531000  |
| 1 | 4.272267000  | -0.532283000 | 2.018581000  |
| 6 | 3.566745000  | -0.034713000 | -0.053528000 |
| 6 | 1.679665000  | -1.624611000 | 0.994292000  |
| 6 | 1.547285000  | -2.270105000 | 2.221268000  |
| 6 | 1.107968000  | -2.208324000 | -0.140576000 |
| 6 | 0.872451000  | -3.485308000 | 2.308392000  |
| 1 | 1.975249000  | -1.817413000 | 3.115633000  |
| 6 | 0.424414000  | -3.410464000 | -0.046198000 |
| 1 | 1.221075000  | -1.714780000 | -1.106941000 |
| 6 | 0.304715000  | -4.076006000 | 1.179386000  |
| 1 | 0.784080000  | -3.984983000 | 3.272439000  |
| 1 | -0.022862000 | -3.851152000 | -0.936921000 |
| 6 | 4.154093000  | -1.268237000 | -0.652083000 |
| 6 | 4.276395000  | -1.368721000 | -2.046138000 |
| 6 | 4.570776000  | -2.361041000 | 0.124539000  |
| 6 | 4.794458000  | -2.512542000 | -2.639276000 |
| 1 | 3.968685000  | -0.537298000 | -2.675001000 |
| 6 | 5.088932000  | -3.502042000 | -0.469071000 |
| 1 | 4.487148000  | -2.340784000 | 1.208300000  |
| 6 | 5.203346000  | -3.584092000 | -1.854193000 |
| 1 | 4.882508000  | -2.562125000 | -3.721506000 |



|    |              |              |              |
|----|--------------|--------------|--------------|
| 1  | 5.408334000  | -4.332593000 | 0.155041000  |
| 1  | 5.612296000  | -4.478887000 | -2.316459000 |
| 6  | 3.555299000  | 1.166646000  | -0.949929000 |
| 6  | 2.459603000  | 1.466545000  | -1.760314000 |
| 6  | 4.697796000  | 1.963281000  | -1.029655000 |
| 6  | 2.491609000  | 2.565780000  | -2.613336000 |
| 1  | 1.576017000  | 0.827324000  | -1.727880000 |
| 6  | 4.730425000  | 3.063506000  | -1.879298000 |
| 1  | 5.564966000  | 1.715616000  | -0.418145000 |
| 6  | 3.625310000  | 3.369715000  | -2.668563000 |
| 1  | 1.628813000  | 2.792590000  | -3.234821000 |
| 1  | 5.621457000  | 3.684742000  | -1.923964000 |
| 1  | 3.650699000  | 4.231907000  | -3.330009000 |
| 6  | -0.392756000 | -5.399454000 | 1.257197000  |
| 1  | 0.232294000  | -6.198351000 | 0.839368000  |
| 1  | -0.625893000 | -5.674378000 | 2.291277000  |
| 1  | -1.328417000 | -5.390640000 | 0.685475000  |
| 79 | -0.556517000 | 0.721764000  | 0.466001000  |
| 15 | -2.794707000 | 0.231204000  | -0.189966000 |
| 6  | -4.066617000 | 1.376888000  | 0.416079000  |
| 6  | -3.248198000 | -1.433727000 | 0.381279000  |
| 6  | -2.969247000 | 0.194996000  | -2.001442000 |
| 6  | -5.309782000 | 0.936682000  | 0.874889000  |
| 6  | -3.784796000 | 2.746555000  | 0.371910000  |
| 6  | -4.204701000 | -2.200729000 | -0.292530000 |
| 6  | -2.644247000 | -1.935544000 | 1.537787000  |
| 6  | -4.043185000 | 0.793895000  | -2.661393000 |
| 6  | -1.986548000 | -0.478332000 | -2.735810000 |
| 6  | -6.262348000 | 1.863586000  | 1.286893000  |
| 1  | -5.532859000 | -0.128097000 | 0.914561000  |
| 6  | -4.743248000 | 3.667443000  | 0.774880000  |
| 1  | -2.812695000 | 3.088873000  | 0.014516000  |
| 6  | -4.562919000 | -3.450551000 | 0.199601000  |
| 1  | -4.666285000 | -1.818113000 | -1.202654000 |
| 6  | -3.011374000 | -3.182597000 | 2.029794000  |
| 1  | -1.876951000 | -1.354392000 | 2.051323000  |
| 6  | -4.129676000 | 0.719588000  | -4.049014000 |
| 1  | -4.809595000 | 1.319033000  | -2.093503000 |
| 6  | -2.081271000 | -0.554478000 | -4.118694000 |
| 1  | -1.152455000 | -0.951135000 | -2.213737000 |
| 6  | -5.981011000 | 3.224773000  | 1.235403000  |
| 1  | -7.227249000 | 1.519124000  | 1.650012000  |
| 1  | -4.523094000 | 4.731210000  | 0.737272000  |
| 6  | -3.970862000 | -3.938090000 | 1.362603000  |

|                                              |              |              |                             |
|----------------------------------------------|--------------|--------------|-----------------------------|
| 1                                            | -5.306747000 | -4.045096000 | -0.324596000                |
| 1                                            | -2.539455000 | -3.566184000 | 2.931727000                 |
| 6                                            | -3.151874000 | 0.049134000  | -4.775520000                |
| 1                                            | -4.964784000 | 1.189148000  | -4.562587000                |
| 1                                            | -1.318585000 | -1.080542000 | -4.687345000                |
| 1                                            | -6.727613000 | 3.945244000  | 1.559752000                 |
| 1                                            | -4.255495000 | -4.914993000 | 1.746521000                 |
| 1                                            | -3.222878000 | -0.004628000 | -5.858896000                |
| Zero-point correction=                       |              |              | 0.691228 (Hartree/Particle) |
| Thermal correction to Energy=                |              |              | 0.733498                    |
| Thermal correction to Enthalpy=              |              |              | 0.734442                    |
| Thermal correction to Gibbs Free Energy=     |              |              | 0.610587                    |
| Sum of electronic and zero-point Energies=   |              |              | -2287.771130                |
| Sum of electronic and thermal Energies=      |              |              | -2287.728860                |
| Sum of electronic and thermal Enthalpies=    |              |              | -2287.727916                |
| Sum of electronic and thermal Free Energies= |              |              | -2287.851771                |

#### A-TS<sub>a1</sub>

|   |              |              |              |
|---|--------------|--------------|--------------|
| 6 | -2.061150000 | -3.223222000 | -3.244418000 |
| 6 | -0.948947000 | -2.537179000 | -2.764730000 |
| 6 | -1.132944000 | -1.317599000 | -2.120899000 |
| 6 | -2.428555000 | -0.787950000 | -1.959845000 |
| 6 | -3.539760000 | -1.490394000 | -2.411230000 |
| 6 | -3.343733000 | -2.704884000 | -3.066481000 |
| 1 | -1.931741000 | -4.177661000 | -3.750508000 |
| 1 | 0.056360000  | -2.941397000 | -2.877379000 |
| 1 | -4.549019000 | -1.118026000 | -2.249080000 |
| 1 | -4.206681000 | -3.258854000 | -3.430065000 |
| 6 | -0.148512000 | -0.426777000 | -1.519831000 |
| 6 | -0.800454000 | 0.619609000  | -0.939092000 |
| 6 | -2.302956000 | 0.428413000  | -1.100375000 |
| 1 | -2.426052000 | -0.165573000 | 0.032443000  |
| 6 | -3.272325000 | 1.463017000  | -1.010991000 |
| 6 | -0.150629000 | 1.758405000  | -0.266924000 |
| 6 | 0.627607000  | 1.546638000  | 0.878387000  |
| 6 | -0.226998000 | 3.058805000  | -0.776613000 |
| 6 | 1.308852000  | 2.592280000  | 1.485943000  |
| 1 | 0.682191000  | 0.541011000  | 1.289820000  |
| 6 | 0.450667000  | 4.106002000  | -0.162036000 |
| 1 | -0.824521000 | 3.247735000  | -1.668472000 |
| 6 | 1.234903000  | 3.890949000  | 0.974467000  |
| 1 | 1.922256000  | 2.389334000  | 2.365681000  |
| 1 | 0.378319000  | 5.111939000  | -0.575994000 |
| 6 | -3.217839000 | 2.492577000  | 0.013992000  |
| 6 | -3.676743000 | 3.791228000  | -0.285582000 |

|    |              |              |              |
|----|--------------|--------------|--------------|
| 6  | -2.658046000 | 2.259189000  | 1.283546000  |
| 6  | -3.542327000 | 4.817849000  | 0.634484000  |
| 1  | -4.097174000 | 3.994989000  | -1.267190000 |
| 6  | -2.553371000 | 3.281732000  | 2.211013000  |
| 1  | -2.336315000 | 1.260489000  | 1.552779000  |
| 6  | -2.980054000 | 4.566103000  | 1.884412000  |
| 1  | -3.875564000 | 5.820144000  | 0.377399000  |
| 1  | -2.124484000 | 3.072277000  | 3.187701000  |
| 1  | -2.881573000 | 5.371973000  | 2.608091000  |
| 6  | -4.360211000 | 1.555336000  | -1.985397000 |
| 6  | -4.071004000 | 1.478357000  | -3.355746000 |
| 6  | -5.684532000 | 1.755111000  | -1.569279000 |
| 6  | -5.086849000 | 1.609606000  | -4.290611000 |
| 1  | -3.041859000 | 1.320303000  | -3.672873000 |
| 6  | -6.701715000 | 1.844060000  | -2.508632000 |
| 1  | -5.906105000 | 1.782440000  | -0.505406000 |
| 6  | -6.403724000 | 1.779470000  | -3.867420000 |
| 1  | -4.854469000 | 1.567708000  | -5.351595000 |
| 1  | -7.730932000 | 1.964300000  | -2.180391000 |
| 1  | -7.201568000 | 1.860595000  | -4.602120000 |
| 6  | 2.015147000  | 5.004782000  | 1.605467000  |
| 1  | 1.681881000  | 5.985283000  | 1.248351000  |
| 1  | 1.925347000  | 4.992490000  | 2.697927000  |
| 1  | 3.085512000  | 4.913087000  | 1.373111000  |
| 79 | 1.887069000  | -0.581952000 | -1.278137000 |
| 15 | 4.093304000  | -0.392969000 | -0.395170000 |
| 6  | 3.925114000  | -0.350806000 | 1.425002000  |
| 6  | 4.854456000  | 1.220179000  | -0.795409000 |
| 6  | 5.370592000  | -1.632510000 | -0.782567000 |
| 6  | 4.816339000  | 0.354645000  | 2.240834000  |
| 6  | 2.824440000  | -0.991593000 | 2.003317000  |
| 6  | 6.229724000  | 1.394193000  | -0.965683000 |
| 6  | 4.001556000  | 2.326216000  | -0.884333000 |
| 6  | 6.281360000  | -2.108585000 | 0.162817000  |
| 6  | 5.432574000  | -2.099378000 | -2.099460000 |
| 6  | 4.611620000  | 0.406999000  | 3.615342000  |
| 1  | 5.664957000  | 0.875797000  | 1.797813000  |
| 6  | 2.612240000  | -0.921894000 | 3.376240000  |
| 1  | 2.100270000  | -1.519939000 | 1.382956000  |
| 6  | 6.745114000  | 2.663803000  | -1.212126000 |
| 1  | 6.898815000  | 0.536422000  | -0.905236000 |
| 6  | 4.521617000  | 3.591835000  | -1.125759000 |
| 1  | 2.925662000  | 2.194715000  | -0.762421000 |
| 6  | 7.247387000  | -3.038340000 | -0.209307000 |

|                                              |              |              |                             |
|----------------------------------------------|--------------|--------------|-----------------------------|
| 1                                            | 6.229422000  | -1.757912000 | 1.192455000                 |
| 6                                            | 6.404354000  | -3.020757000 | -2.469074000                |
| 1                                            | 4.707844000  | -1.740669000 | -2.830947000                |
| 6                                            | 3.507611000  | -0.226335000 | 4.182594000                 |
| 1                                            | 5.308357000  | 0.956379000  | 4.244419000                 |
| 1                                            | 1.734721000  | -1.402270000 | 3.803285000                 |
| 6                                            | 5.894085000  | 3.761781000  | -1.289709000                |
| 1                                            | 7.816663000  | 2.794013000  | -1.345390000                |
| 1                                            | 3.847023000  | 4.442836000  | -1.198587000                |
| 6                                            | 7.310788000  | -3.492017000 | -1.523084000                |
| 1                                            | 7.950771000  | -3.412049000 | 0.531111000                 |
| 1                                            | 6.447581000  | -3.380408000 | -3.494248000                |
| 1                                            | 3.341878000  | -0.168392000 | 5.255999000                 |
| 1                                            | 6.301632000  | 4.751274000  | -1.484137000                |
| 1                                            | 8.065052000  | -4.220992000 | -1.809960000                |
| 8                                            | -4.910131000 | -0.460233000 | 0.385157000                 |
| 16                                           | -4.274937000 | -1.392912000 | 1.307548000                 |
| 9                                            | -3.284444000 | -3.427222000 | -0.092579000                |
| 9                                            | -4.702424000 | -3.989651000 | 1.430646000                 |
| 9                                            | -5.389248000 | -3.057205000 | -0.382834000                |
| 6                                            | -4.410345000 | -3.097379000 | 0.508865000                 |
| 8                                            | -2.073646000 | -3.016370000 | 2.730896000                 |
| 8                                            | -0.262461000 | -1.663632000 | 1.593973000                 |
| 16                                           | -1.581900000 | -1.760798000 | 2.196120000                 |
| 9                                            | -2.679411000 | -0.287202000 | 4.097419000                 |
| 9                                            | -0.808515000 | -1.235855000 | 4.615246000                 |
| 9                                            | -0.827803000 | 0.491756000  | 3.323524000                 |
| 6                                            | -1.483740000 | -0.618080000 | 3.656427000                 |
| 7                                            | -2.668905000 | -1.024058000 | 1.216472000                 |
| 8                                            | -4.777295000 | -1.539694000 | 2.657625000                 |
| Zero-point correction=                       |              |              | 0.746508 (Hartree/Particle) |
| Thermal correction to Energy=                |              |              | 0.802742                    |
| Thermal correction to Enthalpy=              |              |              | 0.803686                    |
| Thermal correction to Gibbs Free Energy=     |              |              | 0.655092                    |
| Sum of electronic and zero-point Energies=   |              |              | -4114.610382                |
| Sum of electronic and thermal Energies=      |              |              | -4114.554149                |
| Sum of electronic and thermal Enthalpies=    |              |              | -4114.553204                |
| Sum of electronic and thermal Free Energies= |              |              | -4114.701798                |

#### A-1a

|   |              |              |              |
|---|--------------|--------------|--------------|
| 6 | -2.462198000 | -2.946829000 | -3.226233000 |
| 6 | -1.466090000 | -2.195010000 | -2.606011000 |
| 6 | -1.830215000 | -1.077780000 | -1.862796000 |
| 6 | -3.186240000 | -0.686749000 | -1.754100000 |

|   |              |              |              |
|---|--------------|--------------|--------------|
| 6 | -4.173702000 | -1.461573000 | -2.355831000 |
| 6 | -3.801567000 | -2.586441000 | -3.093420000 |
| 1 | -2.193432000 | -3.825722000 | -3.808584000 |
| 1 | -0.418154000 | -2.483063000 | -2.680051000 |
| 1 | -5.227989000 | -1.209899000 | -2.262515000 |
| 1 | -4.572161000 | -3.186004000 | -3.573430000 |
| 6 | -0.999670000 | -0.184695000 | -1.058336000 |
| 6 | -1.836500000 | 0.695150000  | -0.414965000 |
| 6 | -3.237088000 | 0.446511000  | -0.804865000 |
| 1 | -0.102924000 | -1.865941000 | 0.098243000  |
| 6 | -4.356944000 | 1.066680000  | -0.321423000 |
| 6 | -1.321708000 | 1.852836000  | 0.345272000  |
| 6 | -0.435507000 | 1.669697000  | 1.416665000  |
| 6 | -1.596796000 | 3.163111000  | -0.055986000 |
| 6 | 0.187644000  | 2.751195000  | 2.023983000  |
| 1 | -0.245717000 | 0.660158000  | 1.781114000  |
| 6 | -0.981633000 | 4.245233000  | 0.565680000  |
| 1 | -2.288828000 | 3.331727000  | -0.880084000 |
| 6 | -0.061888000 | 4.059008000  | 1.599222000  |
| 1 | 0.896486000  | 2.575157000  | 2.835850000  |
| 1 | -1.202011000 | 5.257515000  | 0.225448000  |
| 6 | -4.358035000 | 1.839901000  | 0.932562000  |
| 6 | -5.041710000 | 3.060598000  | 1.017788000  |
| 6 | -3.684355000 | 1.366925000  | 2.066326000  |
| 6 | -5.001428000 | 3.815243000  | 2.181851000  |
| 1 | -5.584839000 | 3.423932000  | 0.146545000  |
| 6 | -3.647081000 | 2.121571000  | 3.231265000  |
| 1 | -3.186612000 | 0.398727000  | 2.023333000  |
| 6 | -4.295523000 | 3.351417000  | 3.289878000  |
| 1 | -5.518924000 | 4.771094000  | 2.225428000  |
| 1 | -3.106233000 | 1.745001000  | 4.096563000  |
| 1 | -4.262257000 | 3.943491000  | 4.201797000  |
| 6 | -5.646477000 | 0.995049000  | -1.039687000 |
| 6 | -5.720351000 | 1.343078000  | -2.393665000 |
| 6 | -6.819553000 | 0.614348000  | -0.377469000 |
| 6 | -6.928018000 | 1.277118000  | -3.077030000 |
| 1 | -4.811776000 | 1.654611000  | -2.905783000 |
| 6 | -8.024244000 | 0.533042000  | -1.064946000 |
| 1 | -6.772590000 | 0.364304000  | 0.681108000  |
| 6 | -8.081265000 | 0.862052000  | -2.416767000 |
| 1 | -6.969398000 | 1.550551000  | -4.128885000 |
| 1 | -8.923839000 | 0.214612000  | -0.542926000 |
| 1 | -9.026145000 | 0.803948000  | -2.952365000 |
| 6 | 0.662717000  | 5.212534000  | 2.225802000  |

|    |              |              |              |
|----|--------------|--------------|--------------|
| 1  | 0.431058000  | 5.306869000  | 3.294201000  |
| 1  | 1.750761000  | 5.081020000  | 2.146662000  |
| 1  | 0.403585000  | 6.161549000  | 1.743564000  |
| 79 | 1.038555000  | 0.127315000  | -0.954669000 |
| 15 | 3.229025000  | 0.977281000  | -0.559282000 |
| 6  | 4.694563000  | 0.033699000  | -1.082548000 |
| 6  | 3.447207000  | 1.323129000  | 1.224555000  |
| 6  | 3.383355000  | 2.626494000  | -1.324210000 |
| 6  | 5.957480000  | 0.259730000  | -0.527672000 |
| 6  | 4.537357000  | -0.932005000 | -2.080317000 |
| 6  | 4.103805000  | 2.469947000  | 1.681170000  |
| 6  | 2.891780000  | 0.436392000  | 2.152263000  |
| 6  | 4.463946000  | 3.015752000  | -2.115065000 |
| 6  | 2.339953000  | 3.527956000  | -1.078601000 |
| 6  | 7.053335000  | -0.468559000 | -0.974955000 |
| 1  | 6.078835000  | 1.002932000  | 0.260099000  |
| 6  | 5.636886000  | -1.656763000 | -2.527103000 |
| 1  | 3.545147000  | -1.124558000 | -2.489837000 |
| 6  | 4.209035000  | 2.719348000  | 3.045843000  |
| 1  | 4.516986000  | 3.180210000  | 0.965499000  |
| 6  | 3.002137000  | 0.684968000  | 3.515418000  |
| 1  | 2.345715000  | -0.439215000 | 1.803105000  |
| 6  | 4.501485000  | 4.300700000  | -2.652745000 |
| 1  | 5.275924000  | 2.318417000  | -2.314360000 |
| 6  | 2.389340000  | 4.810400000  | -1.606374000 |
| 1  | 1.491522000  | 3.227431000  | -0.461317000 |
| 6  | 6.892569000  | -1.425123000 | -1.974629000 |
| 1  | 8.034295000  | -0.294639000 | -0.539015000 |
| 1  | 5.509309000  | -2.410866000 | -3.299738000 |
| 6  | 3.659409000  | 1.827919000  | 3.962892000  |
| 1  | 4.717140000  | 3.616167000  | 3.392895000  |
| 1  | 2.560663000  | -0.008589000 | 4.226987000  |
| 6  | 3.469896000  | 5.197034000  | -2.397174000 |
| 1  | 5.343523000  | 4.599918000  | -3.272572000 |
| 1  | 1.575127000  | 5.503466000  | -1.403930000 |
| 1  | 7.750666000  | -1.998099000 | -2.318356000 |
| 1  | 3.736748000  | 2.028074000  | 5.028983000  |
| 1  | 3.505454000  | 6.199246000  | -2.818049000 |
| 8  | -1.164533000 | -1.440700000 | 2.485743000  |
| 16 | -0.955406000 | -2.807505000 | 2.059869000  |
| 9  | -2.382137000 | -4.470106000 | 0.640321000  |
| 9  | -3.361146000 | -3.662736000 | 2.389439000  |
| 9  | -3.089451000 | -2.430406000 | 0.636058000  |
| 6  | -2.570825000 | -3.391121000 | 1.367860000  |

|                                              |              |              |                             |
|----------------------------------------------|--------------|--------------|-----------------------------|
| 8                                            | 0.608237000  | -5.218694000 | 0.576777000                 |
| 8                                            | 1.269694000  | -3.627397000 | -1.300297000                |
| 16                                           | 1.022621000  | -3.927868000 | 0.091155000                 |
| 9                                            | 2.345400000  | -3.352530000 | 2.277392000                 |
| 9                                            | 3.437330000  | -4.496271000 | 0.803888000                 |
| 9                                            | 3.088191000  | -2.387227000 | 0.498138000                 |
| 6                                            | 2.586742000  | -3.507548000 | 0.990734000                 |
| 7                                            | -0.009035000 | -2.733460000 | 0.671349000                 |
| 8                                            | -0.452944000 | -3.842006000 | 2.928637000                 |
| Zero-point correction=                       |              |              | 0.750727 (Hartree/Particle) |
| Thermal correction to Energy=                |              |              | 0.807921                    |
| Thermal correction to Enthalpy=              |              |              | 0.808865                    |
| Thermal correction to Gibbs Free Energy=     |              |              | 0.657655                    |
| Sum of electronic and zero-point Energies=   |              |              | -4114.645143                |
| Sum of electronic and thermal Energies=      |              |              | -4114.587948                |
| Sum of electronic and thermal Enthalpies=    |              |              | -4114.587004                |
| Sum of electronic and thermal Free Energies= |              |              | -4114.738215                |

#### A-TSa2

|   |              |              |              |
|---|--------------|--------------|--------------|
| 6 | -2.505283000 | -2.498466000 | -3.609319000 |
| 6 | -1.507022000 | -2.005432000 | -2.773570000 |
| 6 | -1.817705000 | -0.968496000 | -1.900732000 |
| 6 | -3.116048000 | -0.414418000 | -1.859916000 |
| 6 | -4.113243000 | -0.934768000 | -2.683514000 |
| 6 | -3.795771000 | -1.970651000 | -3.558530000 |
| 1 | -2.281669000 | -3.310098000 | -4.298292000 |
| 1 | -0.502283000 | -2.427833000 | -2.783741000 |
| 1 | -5.131180000 | -0.552112000 | -2.652613000 |
| 1 | -4.568411000 | -2.373424000 | -4.209855000 |
| 6 | -0.986924000 | -0.361219000 | -0.854505000 |
| 6 | -1.797462000 | 0.531537000  | -0.162217000 |
| 6 | -3.149601000 | 0.532057000  | -0.729724000 |
| 1 | -0.458726000 | -1.417704000 | -0.094255000 |
| 6 | -4.241950000 | 1.195353000  | -0.221477000 |
| 6 | -1.241479000 | 1.511437000  | 0.792100000  |
| 6 | -0.365366000 | 1.118992000  | 1.810602000  |
| 6 | -1.443158000 | 2.881664000  | 0.584332000  |
| 6 | 0.317914000  | 2.069286000  | 2.559563000  |
| 1 | -0.220964000 | 0.058372000  | 2.016272000  |
| 6 | -0.760629000 | 3.824348000  | 1.340913000  |
| 1 | -2.121635000 | 3.204039000  | -0.204755000 |
| 6 | 0.152508000  | 3.434898000  | 2.325892000  |
| 1 | 1.015918000  | 1.740971000  | 3.330418000  |
| 1 | -0.917112000 | 4.886441000  | 1.147409000  |
| 6 | -4.288343000 | 1.620027000  | 1.182242000  |

|    |              |              |              |
|----|--------------|--------------|--------------|
| 6  | -4.808909000 | 2.870206000  | 1.546086000  |
| 6  | -3.789822000 | 0.773700000  | 2.180702000  |
| 6  | -4.762135000 | 3.289575000  | 2.867289000  |
| 1  | -5.211069000 | 3.523823000  | 0.773424000  |
| 6  | -3.753318000 | 1.191592000  | 3.503933000  |
| 1  | -3.431708000 | -0.215628000 | 1.904385000  |
| 6  | -4.226767000 | 2.454074000  | 3.847363000  |
| 1  | -5.140315000 | 4.272897000  | 3.137445000  |
| 1  | -3.350224000 | 0.523965000  | 4.262027000  |
| 1  | -4.191845000 | 2.785794000  | 4.882699000  |
| 6  | -5.422932000 | 1.487381000  | -1.050743000 |
| 6  | -5.267092000 | 2.048385000  | -2.325164000 |
| 6  | -6.716823000 | 1.242861000  | -0.573012000 |
| 6  | -6.375006000 | 2.333243000  | -3.111155000 |
| 1  | -4.261839000 | 2.252359000  | -2.689683000 |
| 6  | -7.823584000 | 1.510149000  | -1.368486000 |
| 1  | -6.842971000 | 0.819004000  | 0.421495000  |
| 6  | -7.655410000 | 2.055837000  | -2.638224000 |
| 1  | -6.240541000 | 2.773157000  | -4.096552000 |
| 1  | -8.822011000 | 1.295030000  | -0.995008000 |
| 1  | -8.523290000 | 2.273040000  | -3.256591000 |
| 6  | 0.953834000  | 4.456722000  | 3.076081000  |
| 1  | 1.614026000  | 3.982634000  | 3.810696000  |
| 1  | 1.590048000  | 5.036696000  | 2.392086000  |
| 1  | 0.313322000  | 5.174108000  | 3.603848000  |
| 79 | 1.072081000  | 0.183110000  | -0.908233000 |
| 15 | 3.210810000  | 1.101173000  | -0.618033000 |
| 6  | 4.619622000  | 0.141011000  | -1.247530000 |
| 6  | 3.530000000  | 1.276334000  | 1.174008000  |
| 6  | 3.316221000  | 2.794154000  | -1.278100000 |
| 6  | 5.939283000  | 0.519246000  | -0.971293000 |
| 6  | 4.365484000  | -1.034123000 | -1.958762000 |
| 6  | 4.048389000  | 2.432287000  | 1.758749000  |
| 6  | 3.219733000  | 0.175775000  | 1.977523000  |
| 6  | 4.258377000  | 3.198521000  | -2.223050000 |
| 6  | 2.347484000  | 3.702330000  | -0.830728000 |
| 6  | 6.993742000  | -0.260193000 | -1.426423000 |
| 1  | 6.138360000  | 1.420560000  | -0.391297000 |
| 6  | 5.427415000  | -1.814258000 | -2.407771000 |
| 1  | 3.337390000  | -1.350484000 | -2.136675000 |
| 6  | 4.253435000  | 2.480413000  | 3.135500000  |
| 1  | 4.280990000  | 3.300345000  | 1.143011000  |
| 6  | 3.437405000  | 0.220440000  | 3.347819000  |
| 1  | 2.787319000  | -0.713227000 | 1.521733000  |



|                                              |              |              |                             |
|----------------------------------------------|--------------|--------------|-----------------------------|
| 6                                            | 4.238682000  | 4.504240000  | -2.708420000                |
| 1                                            | 5.004129000  | 2.494530000  | -2.587508000                |
| 6                                            | 2.341444000  | 5.005287000  | -1.307720000                |
| 1                                            | 1.596859000  | 3.384411000  | -0.103920000                |
| 6                                            | 6.736288000  | -1.425973000 | -2.146403000                |
| 1                                            | 8.018395000  | 0.034190000  | -1.212390000                |
| 1                                            | 5.226222000  | -2.731419000 | -2.955421000                |
| 6                                            | 3.951638000  | 1.377796000  | 3.929417000                 |
| 1                                            | 4.651123000  | 3.386174000  | 3.588323000                 |
| 1                                            | 3.190180000  | -0.644721000 | 3.958871000                 |
| 6                                            | 3.287436000  | 5.407672000  | -2.249282000                |
| 1                                            | 4.972272000  | 4.814025000  | -3.448897000                |
| 1                                            | 1.587922000  | 5.704290000  | -0.950096000                |
| 1                                            | 7.564063000  | -2.038955000 | -2.495531000                |
| 1                                            | 4.113767000  | 1.421331000  | 5.003877000                 |
| 1                                            | 3.277194000  | 6.426377000  | -2.629672000                |
| 8                                            | -1.638529000 | -1.825753000 | 2.409208000                 |
| 16                                           | -1.193397000 | -3.030431000 | 1.729505000                 |
| 9                                            | -2.373686000 | -4.621325000 | 0.020454000                 |
| 9                                            | -3.556615000 | -4.075532000 | 1.743974000                 |
| 9                                            | -3.226189000 | -2.640156000 | 0.161619000                 |
| 6                                            | -2.692268000 | -3.643359000 | 0.840484000                 |
| 8                                            | 0.469364000  | -4.945818000 | -0.255203000                |
| 8                                            | 1.438715000  | -2.875642000 | -1.329309000                |
| 16                                           | 0.906135000  | -3.570280000 | -0.166723000                |
| 9                                            | 1.923495000  | -2.867009000 | 2.199045000                 |
| 9                                            | 2.613972000  | -4.765311000 | 1.444369000                 |
| 9                                            | 3.340390000  | -2.928279000 | 0.580326000                 |
| 6                                            | 2.289786000  | -3.535514000 | 1.114085000                 |
| 7                                            | -0.219115000 | -2.560695000 | 0.488628000                 |
| 8                                            | -0.631174000 | -4.151940000 | 2.453945000                 |
| Zero-point correction=                       |              |              | 0.745540 (Hartree/Particle) |
| Thermal correction to Energy=                |              |              | 0.802326                    |
| Thermal correction to Enthalpy=              |              |              | 0.803270                    |
| Thermal correction to Gibbs Free Energy=     |              |              | 0.651138                    |
| Sum of electronic and zero-point Energies=   |              |              | -4114.637312                |
| Sum of electronic and thermal Energies=      |              |              | -4114.580526                |
| Sum of electronic and thermal Enthalpies=    |              |              | -4114.579582                |
| Sum of electronic and thermal Free Energies= |              |              | -4114.731714                |

#### A-2a

|   |              |              |              |
|---|--------------|--------------|--------------|
| 6 | -0.377088000 | -4.324665000 | -1.925509000 |
| 6 | 0.074499000  | -3.074114000 | -2.330001000 |
| 6 | -0.730239000 | -1.964370000 | -2.081161000 |

|   |              |              |              |
|---|--------------|--------------|--------------|
| 6 | -1.993037000 | -2.090394000 | -1.464462000 |
| 6 | -2.405669000 | -3.345301000 | -1.015007000 |
| 6 | -1.596669000 | -4.451182000 | -1.256444000 |
| 1 | 0.233174000  | -5.205990000 | -2.109401000 |
| 1 | 1.047443000  | -2.957277000 | -2.806853000 |
| 1 | -3.341049000 | -3.467560000 | -0.475165000 |
| 1 | -1.922186000 | -5.431096000 | -0.914592000 |
| 6 | -0.468559000 | -0.539211000 | -2.279247000 |
| 6 | -1.538064000 | 0.197516000  | -1.783729000 |
| 6 | -2.563229000 | -0.739395000 | -1.303130000 |
| 1 | 0.258427000  | -0.129045000 | -2.978251000 |
| 6 | -3.806245000 | -0.430390000 | -0.817199000 |
| 6 | -1.678636000 | 1.651513000  | -1.995574000 |
| 6 | -0.789305000 | 2.563228000  | -1.422168000 |
| 6 | -2.720494000 | 2.155369000  | -2.785140000 |
| 6 | -0.942044000 | 3.931098000  | -1.618918000 |
| 1 | 0.000020000  | 2.204276000  | -0.757508000 |
| 6 | -2.873501000 | 3.519514000  | -2.969977000 |
| 1 | -3.427755000 | 1.461420000  | -3.237256000 |
| 6 | -1.988943000 | 4.433723000  | -2.388081000 |
| 1 | -0.246191000 | 4.621003000  | -1.141952000 |
| 1 | -3.699757000 | 3.890317000  | -3.576460000 |
| 6 | -4.209881000 | 0.902967000  | -0.347967000 |
| 6 | -5.466851000 | 1.406659000  | -0.714821000 |
| 6 | -3.378323000 | 1.683337000  | 0.465874000  |
| 6 | -5.857642000 | 2.680591000  | -0.330794000 |
| 1 | -6.123660000 | 0.795900000  | -1.332279000 |
| 6 | -3.784725000 | 2.948484000  | 0.869722000  |
| 1 | -2.418237000 | 1.285714000  | 0.791153000  |
| 6 | -5.014595000 | 3.455669000  | 0.461137000  |
| 1 | -6.824398000 | 3.068104000  | -0.644234000 |
| 1 | -3.132104000 | 3.541570000  | 1.504308000  |
| 1 | -5.323651000 | 4.450754000  | 0.773928000  |
| 6 | -4.858958000 | -1.465251000 | -0.752960000 |
| 6 | -5.227997000 | -2.175862000 | -1.900080000 |
| 6 | -5.512997000 | -1.730478000 | 0.455561000  |
| 6 | -6.210938000 | -3.155283000 | -1.834951000 |
| 1 | -4.726114000 | -1.958090000 | -2.841243000 |
| 6 | -6.477731000 | -2.727816000 | 0.522923000  |
| 1 | -5.229435000 | -1.170060000 | 1.344186000  |
| 6 | -6.828156000 | -3.441791000 | -0.620301000 |
| 1 | -6.492385000 | -3.700688000 | -2.732837000 |
| 1 | -6.960373000 | -2.947408000 | 1.472356000  |
| 1 | -7.588681000 | -4.217408000 | -0.565294000 |

|    |              |              |              |
|----|--------------|--------------|--------------|
| 6  | -2.183923000 | 5.907356000  | -2.579336000 |
| 1  | -3.143588000 | 6.238727000  | -2.162915000 |
| 1  | -1.392242000 | 6.484070000  | -2.090167000 |
| 1  | -2.188154000 | 6.177474000  | -3.642508000 |
| 79 | 0.842076000  | -0.190042000 | -0.325724000 |
| 15 | 3.209988000  | -0.124536000 | -0.582809000 |
| 6  | 3.776345000  | 1.468223000  | -1.275702000 |
| 6  | 3.859781000  | -1.379369000 | -1.737420000 |
| 6  | 4.145751000  | -0.347141000 | 0.958736000  |
| 6  | 4.762118000  | 1.542914000  | -2.263682000 |
| 6  | 3.218814000  | 2.644986000  | -0.762269000 |
| 6  | 4.867843000  | -2.275248000 | -1.379442000 |
| 6  | 3.316581000  | -1.435796000 | -3.026529000 |
| 6  | 5.412392000  | 0.212008000  | 1.142414000  |
| 6  | 3.559105000  | -1.093517000 | 1.980797000  |
| 6  | 5.179639000  | 2.782607000  | -2.738557000 |
| 1  | 5.204598000  | 0.632336000  | -2.664827000 |
| 6  | 3.644022000  | 3.878945000  | -1.239312000 |
| 1  | 2.468971000  | 2.588287000  | 0.025813000  |
| 6  | 5.323958000  | -3.216070000 | -2.299934000 |
| 1  | 5.297190000  | -2.236680000 | -0.379980000 |
| 6  | 3.780937000  | -2.367041000 | -3.945326000 |
| 1  | 2.528316000  | -0.737327000 | -3.310505000 |
| 6  | 6.080474000  | 0.021035000  | 2.346850000  |
| 1  | 5.870157000  | 0.802644000  | 0.349640000  |
| 6  | 4.224891000  | -1.275447000 | 3.186191000  |
| 1  | 2.567016000  | -1.518216000 | 1.836911000  |
| 6  | 4.620099000  | 3.949598000  | -2.229587000 |
| 1  | 5.945168000  | 2.834818000  | -3.509216000 |
| 1  | 3.208937000  | 4.790009000  | -0.835083000 |
| 6  | 4.784822000  | -3.262441000 | -3.579941000 |
| 1  | 6.107299000  | -3.913138000 | -2.012141000 |
| 1  | 3.355578000  | -2.399720000 | -4.945664000 |
| 6  | 5.485422000  | -0.715070000 | 3.368454000  |
| 1  | 7.064113000  | 0.461013000  | 2.494016000  |
| 1  | 3.743143000  | -1.832555000 | 3.986033000  |
| 1  | 4.946739000  | 4.916854000  | -2.604491000 |
| 1  | 5.145269000  | -3.996706000 | -4.296404000 |
| 1  | 6.003711000  | -0.842947000 | 4.315917000  |
| 8  | -2.353760000 | -1.284452000 | 1.611799000  |
| 16 | -1.246016000 | -1.054272000 | 2.522671000  |
| 9  | 0.883455000  | -2.455201000 | 3.098486000  |
| 9  | -0.914975000 | -3.612888000 | 2.793238000  |
| 9  | 0.128256000  | -2.780127000 | 1.098152000  |

|                                              |              |              |                             |
|----------------------------------------------|--------------|--------------|-----------------------------|
| 6                                            | -0.217727000 | -2.576567000 | 2.366482000                 |
| 8                                            | 1.019106000  | 0.559771000  | 4.084220000                 |
| 8                                            | 1.676764000  | 1.646576000  | 1.909604000                 |
| 16                                           | 0.652945000  | 1.073770000  | 2.779088000                 |
| 9                                            | -0.757054000 | 3.069105000  | 1.877430000                 |
| 9                                            | -1.593086000 | 2.164991000  | 3.647559000                 |
| 9                                            | 0.168526000  | 3.403524000  | 3.800511000                 |
| 6                                            | -0.468537000 | 2.517117000  | 3.054762000                 |
| 7                                            | -0.256684000 | 0.076800000  | 1.852862000                 |
| 8                                            | -1.482114000 | -0.895358000 | 3.944289000                 |
| Zero-point correction=                       |              |              | 0.751438 (Hartree/Particle) |
| Thermal correction to Energy=                |              |              | 0.807613                    |
| Thermal correction to Enthalpy=              |              |              | 0.808557                    |
| Thermal correction to Gibbs Free Energy=     |              |              | 0.660647                    |
| Sum of electronic and zero-point Energies=   |              |              | -4114.671228                |
| Sum of electronic and thermal Energies=      |              |              | -4114.615053                |
| Sum of electronic and thermal Enthalpies=    |              |              | -4114.614109                |
| Sum of electronic and thermal Free Energies= |              |              | -4114.762019                |

#### A-TSb1

|   |              |              |              |
|---|--------------|--------------|--------------|
| 6 | 1.537033000  | -4.368770000 | -1.541318000 |
| 6 | 0.743826000  | -3.286531000 | -1.188522000 |
| 6 | 1.352334000  | -2.049840000 | -0.952836000 |
| 6 | 2.758121000  | -1.922847000 | -1.091652000 |
| 6 | 3.546865000  | -3.005413000 | -1.440860000 |
| 6 | 2.924843000  | -4.232522000 | -1.661275000 |
| 1 | 1.080061000  | -5.338628000 | -1.721200000 |
| 1 | -0.334677000 | -3.392606000 | -1.079922000 |
| 1 | 4.628282000  | -2.906004000 | -1.528048000 |
| 1 | 3.524456000  | -5.098229000 | -1.931498000 |
| 6 | 0.751380000  | -0.786060000 | -0.552502000 |
| 6 | 1.798589000  | 0.086960000  | -0.387699000 |
| 6 | 3.112470000  | -0.488426000 | -0.873107000 |
| 1 | 3.270668000  | -0.016971000 | -1.856895000 |
| 6 | 4.254109000  | -0.080204000 | 0.026049000  |
| 6 | 1.959802000  | 1.422898000  | 0.084762000  |
| 6 | 1.116409000  | 2.506705000  | -0.193521000 |
| 6 | 3.240847000  | 1.665432000  | 0.693527000  |
| 6 | 1.609145000  | 3.789070000  | -0.065641000 |
| 1 | 0.130549000  | 2.324350000  | -0.619248000 |
| 6 | 3.722564000  | 3.005767000  | 0.758999000  |
| 1 | 3.437155000  | 1.095148000  | 1.602747000  |
| 6 | 2.935134000  | 4.063085000  | 0.367172000  |
| 1 | 0.979735000  | 4.630564000  | -0.354665000 |

|    |              |              |              |
|----|--------------|--------------|--------------|
| 1  | 4.702759000  | 3.200150000  | 1.193054000  |
| 6  | 5.485913000  | 0.458856000  | -0.584241000 |
| 6  | 6.442464000  | 1.104654000  | 0.219029000  |
| 6  | 5.756406000  | 0.316013000  | -1.951318000 |
| 6  | 7.614193000  | 1.600341000  | -0.326823000 |
| 1  | 6.251478000  | 1.214478000  | 1.286169000  |
| 6  | 6.942898000  | 0.796952000  | -2.495185000 |
| 1  | 5.058870000  | -0.206250000 | -2.602166000 |
| 6  | 7.869368000  | 1.446816000  | -1.689852000 |
| 1  | 8.336077000  | 2.105311000  | 0.309777000  |
| 1  | 7.140707000  | 0.659877000  | -3.555030000 |
| 1  | 8.791555000  | 1.830962000  | -2.118016000 |
| 6  | 4.419344000  | -0.942043000 | 1.233975000  |
| 6  | 3.333805000  | -1.243117000 | 2.072653000  |
| 6  | 5.639911000  | -1.588175000 | 1.474733000  |
| 6  | 3.471070000  | -2.142330000 | 3.118755000  |
| 1  | 2.363250000  | -0.779103000 | 1.898565000  |
| 6  | 5.771668000  | -2.495883000 | 2.520066000  |
| 1  | 6.487237000  | -1.400375000 | 0.820582000  |
| 6  | 4.692127000  | -2.772697000 | 3.348426000  |
| 1  | 2.618776000  | -2.354253000 | 3.759150000  |
| 1  | 6.727116000  | -2.988131000 | 2.682430000  |
| 1  | 4.797953000  | -3.476920000 | 4.169439000  |
| 6  | 3.411940000  | 5.480536000  | 0.431726000  |
| 1  | 3.420161000  | 5.938373000  | -0.564872000 |
| 1  | 2.756276000  | 6.094857000  | 1.059896000  |
| 1  | 4.425438000  | 5.545594000  | 0.837708000  |
| 79 | -1.247324000 | -0.396019000 | -0.273563000 |
| 15 | -3.565079000 | 0.086361000  | 0.031579000  |
| 6  | -3.897338000 | 1.877558000  | 0.017538000  |
| 6  | -4.221396000 | -0.528950000 | 1.611637000  |
| 6  | -4.625970000 | -0.614307000 | -1.268252000 |
| 6  | -4.712736000 | 2.493306000  | 0.968612000  |
| 6  | -3.327858000 | 2.640172000  | -1.008454000 |
| 6  | -5.512106000 | -1.049349000 | 1.729596000  |
| 6  | -3.403182000 | -0.437799000 | 2.742768000  |
| 6  | -5.774866000 | 0.044651000  | -1.714651000 |
| 6  | -4.292106000 | -1.865343000 | -1.796146000 |
| 6  | -4.953386000 | 3.862434000  | 0.893007000  |
| 1  | -5.159882000 | 1.905533000  | 1.768622000  |
| 6  | -3.578094000 | 4.004026000  | -1.084317000 |
| 1  | -2.696839000 | 2.155718000  | -1.755398000 |
| 6  | -5.976146000 | -1.475817000 | 2.969897000  |
| 1  | -6.152906000 | -1.126269000 | 0.852704000  |

|                                              |              |              |                             |
|----------------------------------------------|--------------|--------------|-----------------------------|
| 6                                            | -3.874812000 | -0.856123000 | 3.980552000                 |
| 1                                            | -2.392892000 | -0.038171000 | 2.647391000                 |
| 6                                            | -6.581627000 | -0.547273000 | -2.680429000                |
| 1                                            | -6.037028000 | 1.020855000  | -1.308926000                |
| 6                                            | -5.104256000 | -2.454560000 | -2.757572000                |
| 1                                            | -3.391154000 | -2.374368000 | -1.451322000                |
| 6                                            | -4.388907000 | 4.615942000  | -0.130265000                |
| 1                                            | -5.587576000 | 4.339821000  | 1.635703000                 |
| 1                                            | -3.141756000 | 4.591889000  | -1.888182000                |
| 6                                            | -5.160249000 | -1.379312000 | 4.092957000                 |
| 1                                            | -6.978681000 | -1.886682000 | 3.058454000                 |
| 1                                            | -3.236225000 | -0.783939000 | 4.857242000                 |
| 6                                            | -6.246691000 | -1.794005000 | -3.200663000                |
| 1                                            | -7.473294000 | -0.032317000 | -3.028861000                |
| 1                                            | -4.842106000 | -3.426567000 | -3.167414000                |
| 1                                            | -4.581761000 | 5.684343000  | -0.187229000                |
| 1                                            | -5.526394000 | -1.716935000 | 5.059299000                 |
| 1                                            | -6.877689000 | -2.251912000 | -3.958250000                |
| Zero-point correction=                       |              |              | 0.689767 (Hartree/Particle) |
| Thermal correction to Energy=                |              |              | 0.731869                    |
| Thermal correction to Enthalpy=              |              |              | 0.732814                    |
| Thermal correction to Gibbs Free Energy=     |              |              | 0.609571                    |
| Sum of electronic and zero-point Energies=   |              |              | -2287.724209                |
| Sum of electronic and thermal Energies=      |              |              | -2287.682106                |
| Sum of electronic and thermal Enthalpies=    |              |              | -2287.681162                |
| Sum of electronic and thermal Free Energies= |              |              | -2287.804405                |

### A-1b

|   |              |              |              |
|---|--------------|--------------|--------------|
| 6 | 1.706389000  | -4.426537000 | -1.377128000 |
| 6 | 0.866810000  | -3.355997000 | -1.124825000 |
| 6 | 1.425693000  | -2.077818000 | -0.976164000 |
| 6 | 2.834659000  | -1.895121000 | -1.079917000 |
| 6 | 3.663842000  | -2.971483000 | -1.347748000 |
| 6 | 3.090984000  | -4.234005000 | -1.484181000 |
| 1 | 1.295896000  | -5.425966000 | -1.493513000 |
| 1 | -0.210578000 | -3.489973000 | -1.040771000 |
| 1 | 4.741123000  | -2.841527000 | -1.432791000 |
| 1 | 3.731032000  | -5.091972000 | -1.675623000 |
| 6 | 0.753680000  | -0.831193000 | -0.697591000 |
| 6 | 1.770486000  | 0.118140000  | -0.622086000 |
| 6 | 3.126754000  | -0.437412000 | -0.959423000 |
| 1 | 3.389600000  | -0.054346000 | -1.961001000 |
| 6 | 4.085335000  | 0.219408000  | 0.072593000  |
| 6 | 1.912956000  | 1.404909000  | -0.124863000 |

|    |              |              |              |
|----|--------------|--------------|--------------|
| 6  | 1.030746000  | 2.502820000  | -0.065943000 |
| 6  | 3.314785000  | 1.581825000  | 0.359757000  |
| 6  | 1.586749000  | 3.753646000  | 0.001767000  |
| 1  | -0.035881000 | 2.367612000  | -0.243528000 |
| 6  | 3.858847000  | 2.945265000  | 0.131187000  |
| 1  | 3.173559000  | 1.600419000  | 1.467306000  |
| 6  | 3.009673000  | 3.998526000  | 0.020747000  |
| 1  | 0.930889000  | 4.623236000  | -0.049073000 |
| 1  | 4.934489000  | 3.104446000  | 0.180799000  |
| 6  | 5.495029000  | 0.469974000  | -0.435245000 |
| 6  | 6.412979000  | 1.098387000  | 0.418402000  |
| 6  | 5.937060000  | 0.076514000  | -1.697062000 |
| 6  | 7.714922000  | 1.353578000  | 0.012418000  |
| 1  | 6.101726000  | 1.372327000  | 1.427310000  |
| 6  | 7.247096000  | 0.324795000  | -2.106379000 |
| 1  | 5.272055000  | -0.448339000 | -2.380459000 |
| 6  | 8.136641000  | 0.969511000  | -1.258940000 |
| 1  | 8.406846000  | 1.842991000  | 0.693439000  |
| 1  | 7.568795000  | 0.004868000  | -3.094439000 |
| 1  | 9.156927000  | 1.163457000  | -1.579359000 |
| 6  | 4.105131000  | -0.679141000 | 1.319980000  |
| 6  | 3.053930000  | -0.693953000 | 2.244237000  |
| 6  | 5.140086000  | -1.603524000 | 1.500548000  |
| 6  | 3.051172000  | -1.579030000 | 3.318776000  |
| 1  | 2.201165000  | -0.025014000 | 2.137366000  |
| 6  | 5.136978000  | -2.490576000 | 2.569972000  |
| 1  | 5.969425000  | -1.630320000 | 0.797261000  |
| 6  | 4.094018000  | -2.479743000 | 3.489447000  |
| 1  | 2.224053000  | -1.559393000 | 4.024409000  |
| 1  | 5.960087000  | -3.191400000 | 2.685962000  |
| 1  | 4.094227000  | -3.167597000 | 4.330973000  |
| 6  | 3.488858000  | 5.412763000  | -0.092105000 |
| 1  | 3.111691000  | 5.887570000  | -1.005762000 |
| 1  | 3.138330000  | 6.018771000  | 0.752190000  |
| 1  | 4.580909000  | 5.464063000  | -0.111856000 |
| 79 | -1.235710000 | -0.477737000 | -0.345156000 |
| 15 | -3.529285000 | 0.066678000  | 0.027063000  |
| 6  | -3.812116000 | 1.846979000  | -0.240330000 |
| 6  | -4.124417000 | -0.280516000 | 1.708261000  |
| 6  | -4.663293000 | -0.788965000 | -1.106165000 |
| 6  | -4.506543000 | 2.637540000  | 0.676641000  |
| 6  | -3.321882000 | 2.418863000  | -1.420802000 |
| 6  | -5.461347000 | -0.601788000 | 1.958498000  |
| 6  | -3.227939000 | -0.153138000 | 2.773535000  |

|                                              |              |              |                             |
|----------------------------------------------|--------------|--------------|-----------------------------|
| 6                                            | -5.818736000 | -0.174174000 | -1.597360000                |
| 6                                            | -4.382262000 | -2.115589000 | -1.447175000                |
| 6                                            | -4.708471000 | 3.989596000  | 0.412855000                 |
| 1                                            | -4.889374000 | 2.199018000  | 1.596953000                 |
| 6                                            | -3.534862000 | 3.765804000  | -1.683178000                |
| 1                                            | -2.781844000 | 1.800485000  | -2.139516000                |
| 6                                            | -5.895234000 | -0.787414000 | 3.266267000                 |
| 1                                            | -6.162522000 | -0.708067000 | 1.132008000                 |
| 6                                            | -3.667991000 | -0.334632000 | 4.079307000                 |
| 1                                            | -2.183386000 | 0.088925000  | 2.574331000                 |
| 6                                            | -6.686595000 | -0.887344000 | -2.417159000                |
| 1                                            | -6.039421000 | 0.861254000  | -1.340608000                |
| 6                                            | -5.254809000 | -2.824627000 | -2.263705000                |
| 1                                            | -3.475908000 | -2.590474000 | -1.069293000                |
| 6                                            | -4.226744000 | 4.552306000  | -0.763991000                |
| 1                                            | -5.249508000 | 4.602990000  | 1.128882000                 |
| 1                                            | -3.162208000 | 4.203272000  | -2.606144000                |
| 6                                            | -5.001017000 | -0.652089000 | 4.324413000                 |
| 1                                            | -6.934707000 | -1.039470000 | 3.459969000                 |
| 1                                            | -2.969249000 | -0.234594000 | 4.905880000                 |
| 6                                            | -6.405937000 | -2.209755000 | -2.748348000                |
| 1                                            | -7.584432000 | -0.408493000 | -2.799551000                |
| 1                                            | -5.034228000 | -3.855901000 | -2.526908000                |
| 1                                            | -4.391871000 | 5.607278000  | -0.968405000                |
| 1                                            | -5.344327000 | -0.799159000 | 5.345346000                 |
| 1                                            | -7.085529000 | -2.763447000 | -3.391196000                |
| Zero-point correction=                       |              |              | 0.690996 (Hartree/Particle) |
| Thermal correction to Energy=                |              |              | 0.733114                    |
| Thermal correction to Enthalpy=              |              |              | 0.734058                    |
| Thermal correction to Gibbs Free Energy=     |              |              | 0.610552                    |
| Sum of electronic and zero-point Energies=   |              |              | -2287.747132                |
| Sum of electronic and thermal Energies=      |              |              | -2287.705014                |
| Sum of electronic and thermal Enthalpies=    |              |              | -2287.704069                |
| Sum of electronic and thermal Free Energies= |              |              | -2287.827575                |

#### A-TSb2

|   |              |             |              |
|---|--------------|-------------|--------------|
| 6 | 0.187041000  | 5.779509000 | -1.125276000 |
| 6 | -0.459289000 | 4.707641000 | -0.520531000 |
| 6 | 0.302421000  | 3.736624000 | 0.130329000  |
| 6 | 1.714611000  | 3.853143000 | 0.165843000  |
| 6 | 2.352784000  | 4.923665000 | -0.439045000 |
| 6 | 1.579131000  | 5.884070000 | -1.090385000 |
| 1 | -0.393887000 | 6.542089000 | -1.639440000 |
| 1 | -1.543934000 | 4.612366000 | -0.554125000 |



|    |              |              |              |
|----|--------------|--------------|--------------|
| 1  | 3.439440000  | 5.001186000  | -0.431187000 |
| 1  | 2.066752000  | 6.720416000  | -1.586567000 |
| 6  | -0.137756000 | 2.501325000  | 0.782077000  |
| 6  | 1.003124000  | 1.922937000  | 1.261339000  |
| 6  | 2.248917000  | 2.718106000  | 0.975570000  |
| 1  | 2.618779000  | 3.106507000  | 1.939316000  |
| 6  | 3.287321000  | 1.660005000  | 0.470033000  |
| 6  | 1.413875000  | 0.641498000  | 1.724146000  |
| 6  | 0.774894000  | -0.306437000 | 2.526849000  |
| 6  | 2.752946000  | 0.382075000  | 1.240290000  |
| 6  | 1.515916000  | -1.362413000 | 3.018663000  |
| 1  | -0.270561000 | -0.174217000 | 2.799255000  |
| 6  | 3.522045000  | -0.620795000 | 1.927618000  |
| 1  | 2.366212000  | -0.546839000 | 0.407262000  |
| 6  | 2.898397000  | -1.523888000 | 2.760534000  |
| 1  | 1.027110000  | -2.097681000 | 3.658738000  |
| 1  | 4.569841000  | -0.760282000 | 1.673801000  |
| 6  | 4.723627000  | 1.982705000  | 0.867763000  |
| 6  | 5.746485000  | 1.079370000  | 0.539278000  |
| 6  | 5.088541000  | 3.166997000  | 1.508975000  |
| 6  | 7.068715000  | 1.336261000  | 0.874590000  |
| 1  | 5.500674000  | 0.179643000  | -0.022748000 |
| 6  | 6.416632000  | 3.430252000  | 1.841768000  |
| 1  | 4.340482000  | 3.919274000  | 1.749075000  |
| 6  | 7.411698000  | 2.513119000  | 1.535568000  |
| 1  | 7.838012000  | 0.615680000  | 0.605891000  |
| 1  | 6.666636000  | 4.363872000  | 2.341039000  |
| 1  | 8.447751000  | 2.717274000  | 1.795808000  |
| 6  | 3.147841000  | 1.523633000  | -1.057155000 |
| 6  | 1.956872000  | 1.044293000  | -1.616490000 |
| 6  | 4.155767000  | 1.926773000  | -1.936091000 |
| 6  | 1.805595000  | 0.907180000  | -2.990483000 |
| 1  | 1.122870000  | 0.757208000  | -0.984192000 |
| 6  | 4.004524000  | 1.794243000  | -3.313718000 |
| 1  | 5.084653000  | 2.338431000  | -1.550638000 |
| 6  | 2.836704000  | 1.268391000  | -3.849426000 |
| 1  | 0.877036000  | 0.494330000  | -3.382570000 |
| 1  | 4.817731000  | 2.099303000  | -3.968805000 |
| 1  | 2.729281000  | 1.144486000  | -4.924202000 |
| 6  | 3.635986000  | -2.673132000 | 3.376512000  |
| 1  | 3.656477000  | -2.600490000 | 4.470859000  |
| 1  | 3.153516000  | -3.625015000 | 3.122364000  |
| 1  | 4.668875000  | -2.719838000 | 3.018711000  |
| 79 | -1.924947000 | 1.525892000  | 0.529648000  |

|    |              |              |              |
|----|--------------|--------------|--------------|
| 15 | -3.832113000 | 0.189250000  | 0.023373000  |
| 6  | -3.800464000 | -1.428591000 | 0.873304000  |
| 6  | -3.962424000 | -0.215463000 | -1.749549000 |
| 6  | -5.449378000 | 0.899257000  | 0.478376000  |
| 6  | -3.807383000 | -2.641133000 | 0.183414000  |
| 6  | -3.781868000 | -1.429551000 | 2.272744000  |
| 6  | -5.191343000 | -0.320839000 | -2.405678000 |
| 6  | -2.778486000 | -0.489448000 | -2.443130000 |
| 6  | -6.550891000 | 0.099749000  | 0.799283000  |
| 6  | -5.588349000 | 2.289636000  | 0.461253000  |
| 6  | -3.817984000 | -3.842371000 | 0.889006000  |
| 1  | -3.805922000 | -2.650742000 | -0.905380000 |
| 6  | -3.804980000 | -2.629200000 | 2.971605000  |
| 1  | -3.763433000 | -0.482382000 | 2.813854000  |
| 6  | -5.232473000 | -0.698040000 | -3.744022000 |
| 1  | -6.116341000 | -0.104707000 | -1.873742000 |
| 6  | -2.828129000 | -0.886296000 | -3.774203000 |
| 1  | -1.820849000 | -0.412828000 | -1.929629000 |
| 6  | -7.775488000 | 0.687582000  | 1.094729000  |
| 1  | -6.447729000 | -0.984691000 | 0.819243000  |
| 6  | -6.815947000 | 2.874102000  | 0.752378000  |
| 1  | -4.723940000 | 2.910040000  | 0.223359000  |
| 6  | -3.825836000 | -3.838241000 | 2.278710000  |
| 1  | -3.819065000 | -4.783814000 | 0.344872000  |
| 1  | -3.803814000 | -2.622280000 | 4.059071000  |
| 6  | -4.054038000 | -0.985736000 | -4.426132000 |
| 1  | -6.190515000 | -0.771892000 | -4.253544000 |
| 1  | -1.903608000 | -1.120386000 | -4.296732000 |
| 6  | -7.908345000 | 2.073428000  | 1.070689000  |
| 1  | -8.628831000 | 0.062329000  | 1.346628000  |
| 1  | -6.916936000 | 3.956522000  | 0.739032000  |
| 1  | -3.841353000 | -4.778084000 | 2.825750000  |
| 1  | -4.091152000 | -1.288556000 | -5.470037000 |
| 1  | -8.866819000 | 2.530734000  | 1.305175000  |
| 8  | 4.374275000  | -1.625503000 | -0.839975000 |
| 16 | 3.183768000  | -2.284650000 | -1.353077000 |
| 9  | 2.280958000  | -4.731991000 | -1.086585000 |
| 9  | 4.380140000  | -4.574139000 | -1.569504000 |
| 9  | 3.700646000  | -4.132169000 | 0.428981000  |
| 6  | 3.396592000  | -4.052951000 | -0.858526000 |
| 8  | -0.387337000 | -0.912234000 | -0.294469000 |
| 8  | 0.106032000  | -2.735525000 | -1.955920000 |
| 16 | 0.380751000  | -2.090245000 | -0.686053000 |
| 9  | -0.773549000 | -2.777690000 | 1.587890000  |

|                                              |              |              |                             |
|----------------------------------------------|--------------|--------------|-----------------------------|
| 9                                            | -0.743238000 | -4.333360000 | 0.095690000                 |
| 9                                            | 1.042135000  | -3.863667000 | 1.209601000                 |
| 6                                            | -0.045677000 | -3.356986000 | 0.646660000                 |
| 7                                            | 1.953371000  | -1.774717000 | -0.392022000                |
| 8                                            | 2.885096000  | -2.305373000 | -2.767523000                |
| Zero-point correction=                       |              |              | 0.749019 (Hartree/Particle) |
| Thermal correction to Energy=                |              |              | 0.803754                    |
| Thermal correction to Enthalpy=              |              |              | 0.804698                    |
| Thermal correction to Gibbs Free Energy=     |              |              | 0.660656                    |
| Sum of electronic and zero-point Energies=   |              |              | -4114.606207                |
| Sum of electronic and thermal Energies=      |              |              | -4114.551471                |
| Sum of electronic and thermal Enthalpies=    |              |              | -4114.550527                |
| Sum of electronic and thermal Free Energies= |              |              | -4114.694569                |

### A-2b

|   |              |              |              |
|---|--------------|--------------|--------------|
| 6 | 0.432774000  | -5.980710000 | 1.133943000  |
| 6 | -0.224648000 | -4.906541000 | 0.539012000  |
| 6 | 0.518507000  | -3.954703000 | -0.154894000 |
| 6 | 1.925005000  | -4.086839000 | -0.237674000 |
| 6 | 2.572284000  | -5.163220000 | 0.345301000  |
| 6 | 1.817780000  | -6.110439000 | 1.040415000  |
| 1 | -0.139602000 | -6.729019000 | 1.678834000  |
| 1 | -1.307472000 | -4.803339000 | 0.610014000  |
| 1 | 3.655931000  | -5.262822000 | 0.279405000  |
| 1 | 2.314706000  | -6.952737000 | 1.517188000  |
| 6 | 0.074331000  | -2.727965000 | -0.834198000 |
| 6 | 1.187505000  | -2.185536000 | -1.386371000 |
| 6 | 2.442131000  | -2.961925000 | -1.076499000 |
| 1 | 2.872887000  | -3.344226000 | -2.016357000 |
| 6 | 3.394212000  | -1.834971000 | -0.545169000 |
| 6 | 1.597790000  | -0.880919000 | -1.863422000 |
| 6 | 0.916375000  | 0.118160000  | -2.555844000 |
| 6 | 2.925002000  | -0.668366000 | -1.437398000 |
| 6 | 1.578315000  | 1.305304000  | -2.858547000 |
| 1 | -0.125611000 | -0.027224000 | -2.842287000 |
| 6 | 3.574686000  | 0.517803000  | -1.746711000 |
| 1 | 2.029188000  | 1.834206000  | -0.443705000 |
| 6 | 2.911093000  | 1.517421000  | -2.477119000 |
| 1 | 1.058029000  | 2.089623000  | -3.408727000 |
| 1 | 4.599558000  | 0.694974000  | -1.422981000 |
| 6 | 4.882406000  | -2.105896000 | -0.698939000 |
| 6 | 5.797471000  | -1.182487000 | -0.172283000 |
| 6 | 5.390704000  | -3.233281000 | -1.343739000 |
| 6 | 7.165870000  | -1.366876000 | -0.314071000 |

|    |              |              |              |
|----|--------------|--------------|--------------|
| 1  | 5.422576000  | -0.320366000 | 0.379840000  |
| 6  | 6.764415000  | -3.425059000 | -1.480788000 |
| 1  | 4.715225000  | -3.989380000 | -1.738032000 |
| 6  | 7.657324000  | -2.490714000 | -0.974138000 |
| 1  | 7.853400000  | -0.634118000 | 0.102969000  |
| 1  | 7.132674000  | -4.316362000 | -1.984290000 |
| 1  | 8.729324000  | -2.639940000 | -1.081032000 |
| 6  | 3.047978000  | -1.553722000 | 0.927037000  |
| 6  | 2.024339000  | -0.675450000 | 1.286510000  |
| 6  | 3.720133000  | -2.225235000 | 1.953118000  |
| 6  | 1.714456000  | -0.430024000 | 2.620738000  |
| 1  | 1.444281000  | -0.179522000 | 0.515753000  |
| 6  | 3.401312000  | -1.998681000 | 3.287075000  |
| 1  | 4.517105000  | -2.924518000 | 1.705373000  |
| 6  | 2.406631000  | -1.088198000 | 3.630243000  |
| 1  | 0.937635000  | 0.297190000  | 2.863257000  |
| 1  | 3.944515000  | -2.530823000 | 4.065002000  |
| 1  | 2.175416000  | -0.893954000 | 4.675057000  |
| 6  | 3.614857000  | 2.793838000  | -2.835138000 |
| 1  | 4.055628000  | 2.738459000  | -3.838894000 |
| 1  | 2.926207000  | 3.647377000  | -2.829814000 |
| 1  | 4.428607000  | 3.013788000  | -2.134376000 |
| 79 | -1.685471000 | -1.727182000 | -0.542873000 |
| 15 | -3.584966000 | -0.390630000 | 0.007135000  |
| 6  | -3.770513000 | 1.123440000  | -0.999727000 |
| 6  | -3.592004000 | 0.161784000  | 1.746617000  |
| 6  | -5.190671000 | -1.240870000 | -0.201703000 |
| 6  | -3.979117000 | 2.390972000  | -0.452940000 |
| 6  | -3.749159000 | 0.969321000  | -2.390316000 |
| 6  | -4.762011000 | 0.631099000  | 2.354154000  |
| 6  | -2.405474000 | 0.110580000  | 2.483898000  |
| 6  | -6.351539000 | -0.590044000 | -0.628145000 |
| 6  | -5.240172000 | -2.603297000 | 0.108441000  |
| 6  | -4.201236000 | 3.483437000  | -1.289202000 |
| 1  | -3.981264000 | 2.523230000  | 0.628482000  |
| 6  | -3.981984000 | 2.058569000  | -3.220400000 |
| 1  | -3.568716000 | -0.016814000 | -2.820629000 |
| 6  | -4.739609000 | 1.059137000  | 3.675537000  |
| 1  | -5.694394000 | 0.654120000  | 1.790506000  |
| 6  | -2.387973000 | 0.540366000  | 3.807357000  |
| 1  | -1.495470000 | -0.272361000 | 2.020670000  |
| 6  | -7.546740000 | -1.294437000 | -0.733152000 |
| 1  | -6.319459000 | 0.468489000  | -0.884895000 |
| 6  | -6.437045000 | -3.302427000 | 0.007819000  |

|                                              |              |              |                             |
|----------------------------------------------|--------------|--------------|-----------------------------|
| 1                                            | -4.329608000 | -3.115051000 | 0.422732000                 |
| 6                                            | -4.216061000 | 3.316667000  | -2.669925000                |
| 1                                            | -4.361470000 | 4.467939000  | -0.855053000                |
| 1                                            | -3.979404000 | 1.926027000  | -4.299751000                |
| 6                                            | -3.551731000 | 1.015776000  | 4.401293000                 |
| 1                                            | -5.652379000 | 1.422419000  | 4.142079000                 |
| 1                                            | -1.462302000 | 0.498896000  | 4.376041000                 |
| 6                                            | -7.590841000 | -2.648063000 | -0.414052000                |
| 1                                            | -8.446470000 | -0.783526000 | -1.068342000                |
| 1                                            | -6.466352000 | -4.361973000 | 0.250004000                 |
| 1                                            | -4.400786000 | 4.169046000  | -3.319596000                |
| 1                                            | -3.536435000 | 1.348638000  | 5.436479000                 |
| 1                                            | -8.526160000 | -3.196158000 | -0.500575000                |
| 8                                            | 4.039811000  | 2.371262000  | 0.973577000                 |
| 16                                           | 2.800434000  | 2.976754000  | 1.402888000                 |
| 9                                            | 1.592591000  | 5.221307000  | 0.880377000                 |
| 9                                            | 3.568394000  | 5.427186000  | 1.736911000                 |
| 9                                            | 3.341523000  | 4.849549000  | -0.331584000                |
| 6                                            | 2.831213000  | 4.751971000  | 0.881383000                 |
| 8                                            | -0.581979000 | 1.226777000  | 0.086971000                 |
| 8                                            | -0.363849000 | 3.221824000  | 1.645210000                 |
| 16                                           | -0.026866000 | 2.514134000  | 0.435036000                 |
| 9                                            | -1.029839000 | 2.962718000  | -1.947143000                |
| 9                                            | -1.176551000 | 4.629944000  | -0.583009000                |
| 9                                            | 0.704253000  | 4.166128000  | -1.523732000                |
| 6                                            | -0.406610000 | 3.656474000  | -1.019955000                |
| 7                                            | 1.642963000  | 2.396577000  | 0.330645000                 |
| 8                                            | 2.312951000  | 2.959330000  | 2.756407000                 |
| Zero-point correction=                       |              |              | 0.754661 (Hartree/Particle) |
| Thermal correction to Energy=                |              |              | 0.810012                    |
| Thermal correction to Enthalpy=              |              |              | 0.810956                    |
| Thermal correction to Gibbs Free Energy=     |              |              | 0.664650                    |
| Sum of electronic and zero-point Energies=   |              |              | -4114.643046                |
| Sum of electronic and thermal Energies=      |              |              | -4114.587694                |
| Sum of electronic and thermal Enthalpies=    |              |              | -4114.586750                |
| Sum of electronic and thermal Free Energies= |              |              | -4114.733056                |

### A-TSa3

|   |             |              |             |
|---|-------------|--------------|-------------|
| 6 | 0.968205000 | -0.593220000 | 4.671414000 |
| 6 | 0.398937000 | 0.329186000  | 3.810485000 |
| 6 | 1.094032000 | 0.694945000  | 2.653134000 |
| 6 | 2.363009000 | 0.127410000  | 2.389532000 |
| 6 | 2.899905000 | -0.855761000 | 3.235473000 |
| 6 | 2.203705000 | -1.196904000 | 4.378173000 |

|   |              |              |              |
|---|--------------|--------------|--------------|
| 1 | 0.442485000  | -0.872512000 | 5.582178000  |
| 1 | -0.579508000 | 0.762444000  | 4.018189000  |
| 1 | 3.847762000  | -1.331575000 | 2.995840000  |
| 1 | 2.609616000  | -1.943149000 | 5.056572000  |
| 6 | 0.692832000  | 1.625362000  | 1.579462000  |
| 6 | 1.866308000  | 1.686954000  | 0.673580000  |
| 6 | 2.818456000  | 0.659611000  | 1.137797000  |
| 1 | 0.370356000  | 2.611970000  | 1.932028000  |
| 6 | 3.758951000  | 0.246654000  | 0.195147000  |
| 6 | 2.322361000  | 3.071355000  | 0.321873000  |
| 6 | 1.389068000  | 3.998565000  | -0.157349000 |
| 6 | 3.644502000  | 3.489781000  | 0.477883000  |
| 6 | 1.767630000  | 5.293257000  | -0.472956000 |
| 1 | 0.351875000  | 3.688465000  | -0.290131000 |
| 6 | 4.017653000  | 4.791893000  | 0.158649000  |
| 1 | 4.390787000  | 2.799346000  | 0.865459000  |
| 6 | 3.093029000  | 5.714043000  | -0.325518000 |
| 1 | 1.022827000  | 5.996363000  | -0.844997000 |
| 1 | 5.053892000  | 5.098701000  | 0.297420000  |
| 6 | 3.299335000  | 0.641020000  | -1.088217000 |
| 6 | 4.094875000  | 0.981110000  | -2.198848000 |
| 6 | 1.871465000  | 0.891759000  | -1.102431000 |
| 6 | 3.517586000  | 1.662661000  | -3.243053000 |
| 1 | 5.164993000  | 0.787762000  | -2.175216000 |
| 6 | 1.320829000  | 1.602730000  | -2.218051000 |
| 1 | 1.256989000  | 0.058411000  | -0.744168000 |
| 6 | 2.132453000  | 1.983431000  | -3.249034000 |
| 1 | 4.135715000  | 1.990755000  | -4.075812000 |
| 1 | 0.244689000  | 1.762231000  | -2.256392000 |
| 1 | 1.716301000  | 2.497712000  | -4.112121000 |
| 6 | 5.009575000  | -0.463628000 | 0.443291000  |
| 6 | 5.797452000  | -0.153085000 | 1.558993000  |
| 6 | 5.451342000  | -1.448805000 | -0.449349000 |
| 6 | 7.002420000  | -0.808900000 | 1.774509000  |
| 1 | 5.456026000  | 0.614467000  | 2.253606000  |
| 6 | 6.656876000  | -2.100993000 | -0.232466000 |
| 1 | 4.812763000  | -1.724578000 | -1.286790000 |
| 6 | 7.435741000  | -1.781058000 | 0.876767000  |
| 1 | 7.608400000  | -0.556922000 | 2.641638000  |
| 1 | 6.983822000  | -2.873998000 | -0.923577000 |
| 1 | 8.379459000  | -2.294656000 | 1.045440000  |
| 6 | 3.503991000  | 7.106600000  | -0.698041000 |
| 1 | 2.725783000  | 7.836543000  | -0.448353000 |
| 1 | 4.424748000  | 7.404664000  | -0.185497000 |

|    |              |              |              |
|----|--------------|--------------|--------------|
| 1  | 3.689537000  | 7.192250000  | -1.776646000 |
| 79 | -1.155708000 | 0.900912000  | 0.748748000  |
| 15 | -3.371611000 | 0.362297000  | 0.119074000  |
| 6  | -4.023172000 | 1.479116000  | -1.170744000 |
| 6  | -4.489510000 | 0.611826000  | 1.543436000  |
| 6  | -3.719504000 | -1.328940000 | -0.439091000 |
| 6  | -5.139169000 | 2.290056000  | -0.954915000 |
| 6  | -3.351778000 | 1.530409000  | -2.399587000 |
| 6  | -5.682942000 | -0.104739000 | 1.668794000  |
| 6  | -4.170278000 | 1.585925000  | 2.494258000  |
| 6  | -4.630722000 | -1.593289000 | -1.463853000 |
| 6  | -3.103178000 | -2.383339000 | 0.239779000  |
| 6  | -5.580232000 | 3.148832000  | -1.958164000 |
| 1  | -5.667040000 | 2.254655000  | -0.003577000 |
| 6  | -3.806151000 | 2.382718000  | -3.398009000 |
| 1  | -2.489185000 | 0.886649000  | -2.570503000 |
| 6  | -6.545105000 | 0.155881000  | 2.728191000  |
| 1  | -5.934580000 | -0.869535000 | 0.935410000  |
| 6  | -5.037032000 | 1.848065000  | 3.549223000  |
| 1  | -3.234266000 | 2.138540000  | 2.401394000  |
| 6  | -4.932693000 | -2.908869000 | -1.796142000 |
| 1  | -5.103462000 | -0.771158000 | -1.998835000 |
| 6  | -3.420691000 | -3.694650000 | -0.089456000 |
| 1  | -2.357581000 | -2.178583000 | 1.010377000  |
| 6  | -4.915852000 | 3.195660000  | -3.178153000 |
| 1  | -6.448473000 | 3.779819000  | -1.782980000 |
| 1  | -3.288900000 | 2.412961000  | -4.354232000 |
| 6  | -6.224976000 | 1.132554000  | 3.666687000  |
| 1  | -7.470486000 | -0.407612000 | 2.821455000  |
| 1  | -4.781430000 | 2.607807000  | 4.284038000  |
| 6  | -4.332421000 | -3.956584000 | -1.105775000 |
| 1  | -5.636031000 | -3.114799000 | -2.599513000 |
| 1  | -2.929378000 | -4.512374000 | 0.428893000  |
| 1  | -5.263535000 | 3.865751000  | -3.961218000 |
| 1  | -6.900814000 | 1.333014000  | 4.494801000  |
| 1  | -4.564779000 | -4.984983000 | -1.371739000 |
| 8  | 2.592815000  | -2.390274000 | 0.436801000  |
| 16 | 1.386567000  | -2.995636000 | -0.115160000 |
| 9  | -0.623827000 | -4.229123000 | 1.012867000  |
| 9  | 1.249902000  | -4.394426000 | 2.071199000  |
| 9  | 0.134071000  | -2.547661000 | 2.134617000  |
| 6  | 0.475646000  | -3.578838000 | 1.373043000  |
| 8  | -1.211921000 | -3.095947000 | -2.255465000 |
| 8  | -0.968812000 | -0.591454000 | -2.240654000 |

|                                              |              |              |                             |
|----------------------------------------------|--------------|--------------|-----------------------------|
| 16                                           | -0.386171000 | -1.921258000 | -2.039090000                |
| 9                                            | 2.099475000  | -1.519504000 | -2.876818000                |
| 9                                            | 1.154113000  | -3.261405000 | -3.725746000                |
| 9                                            | 0.583754000  | -1.296090000 | -4.394759000                |
| 6                                            | 0.955180000  | -2.018205000 | -3.346867000                |
| 7                                            | 0.397780000  | -1.831502000 | -0.635312000                |
| 8                                            | 1.507909000  | -4.142823000 | -1.002901000                |
| Zero-point correction=                       |              |              | 0.748620 (Hartree/Particle) |
| Thermal correction to Energy=                |              |              | 0.804348                    |
| Thermal correction to Enthalpy=              |              |              | 0.805293                    |
| Thermal correction to Gibbs Free Energy=     |              |              | 0.657004                    |
| Sum of electronic and zero-point Energies=   |              |              | -4114.626003                |
| Sum of electronic and thermal Energies=      |              |              | -4114.570274                |
| Sum of electronic and thermal Enthalpies=    |              |              | -4114.569330                |
| Sum of electronic and thermal Free Energies= |              |              | -4114.717619                |

### A-3a

|   |              |              |              |
|---|--------------|--------------|--------------|
| 6 | -1.188070000 | -0.008555000 | -4.600016000 |
| 6 | -0.585549000 | 0.721218000  | -3.593815000 |
| 6 | -1.276314000 | 0.922934000  | -2.390823000 |
| 6 | -2.586513000 | 0.394218000  | -2.251581000 |
| 6 | -3.168186000 | -0.391543000 | -3.266053000 |
| 6 | -2.467653000 | -0.579021000 | -4.435661000 |
| 1 | -0.657086000 | -0.166944000 | -5.536646000 |
| 1 | 0.422236000  | 1.118606000  | -3.714184000 |
| 1 | -4.147298000 | -0.841057000 | -3.115970000 |
| 1 | -2.894099000 | -1.176260000 | -5.237324000 |
| 6 | -0.824303000 | 1.622564000  | -1.178159000 |
| 6 | -2.030600000 | 1.575879000  | -0.242124000 |
| 6 | -3.021177000 | 0.688800000  | -0.935419000 |
| 1 | -0.534576000 | 2.656603000  | -1.409201000 |
| 6 | -3.961037000 | 0.151158000  | -0.052211000 |
| 6 | -2.526680000 | 2.992552000  | 0.044315000  |
| 6 | -1.622912000 | 3.920153000  | 0.578340000  |
| 6 | -3.834468000 | 3.414494000  | -0.185575000 |
| 6 | -2.016399000 | 5.215880000  | 0.872638000  |
| 1 | -0.590500000 | 3.620068000  | 0.759402000  |
| 6 | -4.223913000 | 4.719466000  | 0.109865000  |
| 1 | -4.568210000 | 2.723758000  | -0.593723000 |
| 6 | -3.327826000 | 5.642041000  | 0.640406000  |
| 1 | -1.292919000 | 5.916376000  | 1.289585000  |
| 1 | -5.252703000 | 5.024332000  | -0.079953000 |
| 6 | -3.455802000 | 0.367325000  | 1.242164000  |
| 6 | -4.122345000 | 0.294927000  | 2.481246000  |



|    |              |              |              |
|----|--------------|--------------|--------------|
| 6  | -2.035847000 | 0.795705000  | 1.170650000  |
| 6  | -3.486469000 | 0.779453000  | 3.595201000  |
| 1  | -5.150844000 | -0.055882000 | 2.526779000  |
| 6  | -1.466869000 | 1.370708000  | 2.391179000  |
| 1  | -1.433177000 | -0.108753000 | 0.932233000  |
| 6  | -2.161465000 | 1.321286000  | 3.554633000  |
| 1  | -4.016152000 | 0.785134000  | 4.545975000  |
| 1  | -0.439675000 | 1.732328000  | 2.362442000  |
| 1  | -1.715117000 | 1.677570000  | 4.479391000  |
| 6  | -5.198384000 | -0.554466000 | -0.392478000 |
| 6  | -6.048661000 | -0.047303000 | -1.382810000 |
| 6  | -5.555778000 | -1.737331000 | 0.265897000  |
| 6  | -7.230833000 | -0.702141000 | -1.704093000 |
| 1  | -5.775607000 | 0.872707000  | -1.899861000 |
| 6  | -6.739721000 | -2.389042000 | -0.055481000 |
| 1  | -4.870708000 | -2.164906000 | 0.996209000  |
| 6  | -7.581037000 | -1.872572000 | -1.037030000 |
| 1  | -7.883809000 | -0.295035000 | -2.472657000 |
| 1  | -6.999438000 | -3.314352000 | 0.453213000  |
| 1  | -8.505763000 | -2.387007000 | -1.287874000 |
| 6  | -3.739075000 | 7.052270000  | 0.939119000  |
| 1  | -4.828012000 | 7.165405000  | 0.920775000  |
| 1  | -3.382857000 | 7.374833000  | 1.924559000  |
| 1  | -3.323215000 | 7.753865000  | 0.204673000  |
| 79 | 1.078251000  | 0.889696000  | -0.528903000 |
| 15 | 3.386272000  | 0.476564000  | -0.141572000 |
| 6  | 4.087236000  | 1.466535000  | 1.222599000  |
| 6  | 4.344531000  | 0.992326000  | -1.612465000 |
| 6  | 3.926414000  | -1.233193000 | 0.152581000  |
| 6  | 5.218743000  | 2.268995000  | 1.060029000  |
| 6  | 3.458679000  | 1.394670000  | 2.471865000  |
| 6  | 5.556742000  | 0.385471000  | -1.952637000 |
| 6  | 3.868035000  | 2.054460000  | -2.387042000 |
| 6  | 4.901981000  | -1.556798000 | 1.097540000  |
| 6  | 3.385701000  | -2.230656000 | -0.662958000 |
| 6  | 5.718390000  | 2.993688000  | 2.138532000  |
| 1  | 5.711742000  | 2.330643000  | 0.091303000  |
| 6  | 3.970478000  | 2.113314000  | 3.545383000  |
| 1  | 2.582834000  | 0.758785000  | 2.596069000  |
| 6  | 6.280364000  | 0.838391000  | -3.050759000 |
| 1  | 5.931724000  | -0.445619000 | -1.356840000 |
| 6  | 4.596109000  | 2.508551000  | -3.480995000 |
| 1  | 2.916579000  | 2.520663000  | -2.127064000 |
| 6  | 5.341013000  | -2.871098000 | 1.214095000  |

|                                              |              |              |                             |
|----------------------------------------------|--------------|--------------|-----------------------------|
| 1                                            | 5.318472000  | -0.782851000 | 1.740163000                 |
| 6                                            | 3.843167000  | -3.537221000 | -0.554985000                |
| 1                                            | 2.589239000  | -1.988172000 | -1.369007000                |
| 6                                            | 5.097179000  | 2.915206000  | 3.380047000                 |
| 1                                            | 6.598331000  | 3.618914000  | 2.006049000                 |
| 1                                            | 3.486121000  | 2.046014000  | 4.516828000                 |
| 6                                            | 5.802010000  | 1.899132000  | -3.814402000                |
| 1                                            | 7.220555000  | 0.358325000  | -3.312181000                |
| 1                                            | 4.217661000  | 3.334924000  | -4.078062000                |
| 6                                            | 4.818236000  | -3.857117000 | 0.383768000                 |
| 1                                            | 6.093985000  | -3.124451000 | 1.956658000                 |
| 1                                            | 3.416140000  | -4.311823000 | -1.185681000                |
| 1                                            | 5.491496000  | 3.480048000  | 4.221849000                 |
| 1                                            | 6.368524000  | 2.247843000  | -4.674828000                |
| 1                                            | 5.163358000  | -4.884075000 | 0.477735000                 |
| 8                                            | -2.414435000 | -2.332521000 | -0.762761000                |
| 16                                           | -1.227643000 | -2.936991000 | -0.173318000                |
| 9                                            | 0.944853000  | -3.935103000 | -1.211641000                |
| 9                                            | -0.852209000 | -4.298393000 | -2.350896000                |
| 9                                            | 0.067675000  | -2.346520000 | -2.380998000                |
| 6                                            | -0.197457000 | -3.405738000 | -1.624652000                |
| 8                                            | 1.497343000  | -3.122247000 | 1.759554000                 |
| 8                                            | 1.027105000  | -0.689234000 | 2.224757000                 |
| 16                                           | 0.555978000  | -2.018390000 | 1.827680000                 |
| 9                                            | -1.853846000 | -2.005623000 | 2.930838000                 |
| 9                                            | -0.703398000 | -3.779239000 | 3.361387000                 |
| 9                                            | -0.212484000 | -1.920429000 | 4.325875000                 |
| 6                                            | -0.637671000 | -2.476824000 | 3.199597000                 |
| 7                                            | -0.355951000 | -1.764674000 | 0.517853000                 |
| 8                                            | -1.347025000 | -4.150671000 | 0.621625000                 |
| Zero-point correction=                       |              |              | 0.748964 (Hartree/Particle) |
| Thermal correction to Energy=                |              |              | 0.806108                    |
| Thermal correction to Enthalpy=              |              |              | 0.807052                    |
| Thermal correction to Gibbs Free Energy=     |              |              | 0.654061                    |
| Sum of electronic and zero-point Energies=   |              |              | -4114.630223                |
| Sum of electronic and thermal Energies=      |              |              | -4114.573079                |
| Sum of electronic and thermal Enthalpies=    |              |              | -4114.572135                |
| Sum of electronic and thermal Free Energies= |              |              | -4114.725126                |

#### A-TSa4

|   |             |             |             |
|---|-------------|-------------|-------------|
| 6 | 1.199351000 | 3.986951000 | 2.814046000 |
| 6 | 0.726865000 | 3.554239000 | 1.584297000 |
| 6 | 1.392173000 | 2.521407000 | 0.918515000 |
| 6 | 2.555206000 | 1.962842000 | 1.497742000 |

|   |              |              |              |
|---|--------------|--------------|--------------|
| 6 | 3.005498000  | 2.383244000  | 2.756499000  |
| 6 | 2.325074000  | 3.397781000  | 3.407545000  |
| 1 | 0.683292000  | 4.792793000  | 3.332572000  |
| 1 | -0.167711000 | 3.996919000  | 1.145793000  |
| 1 | 3.883283000  | 1.928550000  | 3.209347000  |
| 1 | 2.668178000  | 3.745583000  | 4.378839000  |
| 6 | 1.026030000  | 1.869294000  | -0.366586000 |
| 6 | 2.318857000  | 1.085465000  | -0.727844000 |
| 6 | 3.022336000  | 0.942070000  | 0.600238000  |
| 1 | 0.807264000  | 2.635263000  | -1.121319000 |
| 6 | 3.787522000  | -0.193809000 | 0.675393000  |
| 6 | 3.140960000  | 1.967427000  | -1.692750000 |
| 6 | 2.554718000  | 2.385210000  | -2.894078000 |
| 6 | 4.462645000  | 2.338139000  | -1.453967000 |
| 6 | 3.262763000  | 3.143582000  | -3.813685000 |
| 1 | 1.522717000  | 2.110225000  | -3.114115000 |
| 6 | 5.168780000  | 3.104534000  | -2.378102000 |
| 1 | 4.959536000  | 2.021995000  | -0.540221000 |
| 6 | 4.585309000  | 3.524380000  | -3.569727000 |
| 1 | 2.781102000  | 3.450649000  | -4.741934000 |
| 1 | 6.200656000  | 3.381598000  | -2.163085000 |
| 6 | 3.532535000  | -0.953482000 | -0.520465000 |
| 6 | 4.156547000  | -2.114785000 | -0.988030000 |
| 6 | 2.458065000  | -0.351664000 | -1.286360000 |
| 6 | 3.821496000  | -2.587259000 | -2.242448000 |
| 1 | 4.911860000  | -2.612524000 | -0.384812000 |
| 6 | 2.292559000  | -0.768881000 | -2.647882000 |
| 1 | 1.500398000  | -1.142350000 | -0.873623000 |
| 6 | 2.910087000  | -1.913634000 | -3.084341000 |
| 1 | 4.299729000  | -3.493446000 | -2.609395000 |
| 1 | 1.565743000  | -0.256972000 | -3.272657000 |
| 1 | 2.699325000  | -2.309846000 | -4.073690000 |
| 6 | 4.708407000  | -0.579660000 | 1.754676000  |
| 6 | 5.658826000  | 0.338504000  | 2.219794000  |
| 6 | 4.674062000  | -1.857438000 | 2.324662000  |
| 6 | 6.542687000  | -0.003898000 | 3.235570000  |
| 1 | 5.707381000  | 1.329041000  | 1.767945000  |
| 6 | 5.561880000  | -2.198642000 | 3.339118000  |
| 1 | 3.926397000  | -2.568369000 | 1.982024000  |
| 6 | 6.496535000  | -1.276146000 | 3.798607000  |
| 1 | 7.275244000  | 0.721427000  | 3.582755000  |
| 1 | 5.515561000  | -3.192392000 | 3.779027000  |
| 1 | 7.188567000  | -1.547460000 | 4.592566000  |
| 6 | 5.335544000  | 4.377151000  | -4.548149000 |

|    |              |              |              |
|----|--------------|--------------|--------------|
| 1  | 6.418718000  | 4.264489000  | -4.431093000 |
| 1  | 5.078950000  | 4.124141000  | -5.583161000 |
| 1  | 5.102807000  | 5.441088000  | -4.410560000 |
| 79 | -0.917953000 | 1.041387000  | -0.112063000 |
| 15 | -3.268591000 | 0.717955000  | 0.239252000  |
| 6  | -4.268700000 | 0.253328000  | -1.215676000 |
| 6  | -3.993760000 | 2.335057000  | 0.719224000  |
| 6  | -3.736038000 | -0.411356000 | 1.588003000  |
| 6  | -5.662002000 | 0.155835000  | -1.132774000 |
| 6  | -3.633092000 | 0.044152000  | -2.439894000 |
| 6  | -5.085801000 | 2.455107000  | 1.583735000  |
| 6  | -3.458699000 | 3.488078000  | 0.136217000  |
| 6  | -4.254274000 | -1.682098000 | 1.335870000  |
| 6  | -3.441751000 | -0.033506000 | 2.903263000  |
| 6  | -6.406515000 | -0.161876000 | -2.260829000 |
| 1  | -6.166123000 | 0.326786000  | -0.182229000 |
| 6  | -4.383726000 | -0.269146000 | -3.569361000 |
| 1  | -2.547859000 | 0.106058000  | -2.503487000 |
| 6  | -5.627840000 | 3.705854000  | 1.859529000  |
| 1  | -5.505883000 | 1.569345000  | 2.057794000  |
| 6  | -4.005212000 | 4.736943000  | 0.408781000  |
| 1  | -2.604563000 | 3.400530000  | -0.536770000 |
| 6  | -4.492317000 | -2.556889000 | 2.391115000  |
| 1  | -4.450997000 | -1.996382000 | 0.313848000  |
| 6  | -3.690122000 | -0.906495000 | 3.953432000  |
| 1  | -3.007918000 | 0.946213000  | 3.104397000  |
| 6  | -5.766649000 | -0.374599000 | -3.480263000 |
| 1  | -7.488834000 | -0.241110000 | -2.190137000 |
| 1  | -3.880932000 | -0.437639000 | -4.518589000 |
| 6  | -5.089630000 | 4.847246000  | 1.273616000  |
| 1  | -6.473810000 | 3.788077000  | 2.538143000  |
| 1  | -3.578849000 | 5.625827000  | -0.050382000 |
| 6  | -4.215398000 | -2.171083000 | 3.697529000  |
| 1  | -4.888275000 | -3.548634000 | 2.187061000  |
| 1  | -3.462461000 | -0.604812000 | 4.973157000  |
| 1  | -6.351816000 | -0.623431000 | -4.362794000 |
| 1  | -5.514378000 | 5.824070000  | 1.493238000  |
| 1  | -4.400253000 | -2.859592000 | 4.518776000  |
| 8  | 2.114902000  | -3.296050000 | 0.997670000  |
| 16 | 0.691145000  | -3.078866000 | 0.813730000  |
| 9  | -1.056648000 | -1.625288000 | 2.095539000  |
| 9  | 0.472943000  | -2.522505000 | 3.327408000  |
| 9  | 0.950280000  | -0.819933000 | 2.087199000  |
| 6  | 0.224711000  | -1.925529000 | 2.173893000  |

|                                              |              |              |                             |
|----------------------------------------------|--------------|--------------|-----------------------------|
| 8                                            | -2.086579000 | -2.281277000 | -0.778476000                |
| 8                                            | -0.603265000 | -1.220199000 | -2.524454000                |
| 16                                           | -0.818253000 | -2.218922000 | -1.484418000                |
| 9                                            | 0.607805000  | -4.062744000 | -2.687133000                |
| 9                                            | -1.150060000 | -4.835658000 | -1.700501000                |
| 9                                            | -1.354124000 | -3.711982000 | -3.522065000                |
| 6                                            | -0.664921000 | -3.834344000 | -2.397876000                |
| 7                                            | 0.499656000  | -2.138607000 | -0.518619000                |
| 8                                            | -0.243066000 | -4.185269000 | 0.866430000                 |
| Zero-point correction=                       |              |              | 0.745058 (Hartree/Particle) |
| Thermal correction to Energy=                |              |              | 0.801602                    |
| Thermal correction to Enthalpy=              |              |              | 0.802546                    |
| Thermal correction to Gibbs Free Energy=     |              |              | 0.651498                    |
| Sum of electronic and zero-point Energies=   |              |              | -4114.624630                |
| Sum of electronic and thermal Energies=      |              |              | -4114.568087                |
| Sum of electronic and thermal Enthalpies=    |              |              | -4114.567143                |
| Sum of electronic and thermal Free Energies= |              |              | -4114.718190                |

#### A-4a

|   |              |              |              |
|---|--------------|--------------|--------------|
| 6 | -2.422334000 | 0.359965000  | -3.696015000 |
| 6 | -1.182675000 | 0.835165000  | -3.275137000 |
| 6 | -1.064606000 | 1.455063000  | -2.033584000 |
| 6 | -2.215808000 | 1.604289000  | -1.222366000 |
| 6 | -3.461155000 | 1.136821000  | -1.653024000 |
| 6 | -3.556299000 | 0.506305000  | -2.894471000 |
| 1 | -2.509614000 | -0.131475000 | -4.662911000 |
| 1 | -0.298254000 | 0.699382000  | -3.897174000 |
| 1 | -4.345078000 | 1.246062000  | -1.026895000 |
| 1 | -4.521436000 | 0.139501000  | -3.237510000 |
| 6 | 0.161901000  | 1.994025000  | -1.376077000 |
| 6 | -0.415013000 | 2.828438000  | -0.192332000 |
| 6 | -1.764030000 | 2.179009000  | 0.032066000  |
| 1 | 0.723121000  | 2.622922000  | -2.079306000 |
| 6 | -2.026280000 | 1.974478000  | 1.348475000  |
| 6 | -0.544158000 | 4.300085000  | -0.600872000 |
| 6 | 0.594533000  | 4.994032000  | -1.027837000 |
| 6 | -1.743142000 | 5.005211000  | -0.523738000 |
| 6 | 0.532894000  | 6.337440000  | -1.362846000 |
| 1 | 1.548770000  | 4.469919000  | -1.093796000 |
| 6 | -1.803356000 | 6.353922000  | -0.866609000 |
| 1 | -2.644762000 | 4.498749000  | -0.183527000 |
| 6 | -0.671705000 | 7.043903000  | -1.290966000 |
| 1 | 1.435824000  | 6.855897000  | -1.686385000 |
| 1 | -2.754790000 | 6.881443000  | -0.799865000 |

|    |              |              |              |
|----|--------------|--------------|--------------|
| 6  | -0.826184000 | 2.363651000  | 2.104460000  |
| 6  | -0.570044000 | 2.314948000  | 3.471110000  |
| 6  | 0.172322000  | 2.789947000  | 1.204578000  |
| 6  | 0.697075000  | 2.675801000  | 3.931344000  |
| 1  | -1.346470000 | 2.004843000  | 4.168650000  |
| 6  | 1.422056000  | 3.157899000  | 1.670413000  |
| 1  | -2.818103000 | -0.697715000 | -0.749992000 |
| 6  | 1.687967000  | 3.082028000  | 3.040714000  |
| 1  | 0.911496000  | 2.643818000  | 4.998270000  |
| 1  | 2.197709000  | 3.483559000  | 0.977656000  |
| 1  | 2.676264000  | 3.343552000  | 3.413475000  |
| 6  | -3.225358000 | 1.353025000  | 1.920797000  |
| 6  | -4.496919000 | 1.807089000  | 1.550256000  |
| 6  | -3.135964000 | 0.295195000  | 2.836178000  |
| 6  | -5.644162000 | 1.215722000  | 2.065180000  |
| 1  | -4.571782000 | 2.650522000  | 0.864049000  |
| 6  | -4.283157000 | -0.304817000 | 3.341166000  |
| 1  | -2.155575000 | -0.070346000 | 3.133641000  |
| 6  | -5.540894000 | 0.152892000  | 2.956503000  |
| 1  | -6.622835000 | 1.581804000  | 1.763674000  |
| 1  | -4.194058000 | -1.142533000 | 4.029493000  |
| 1  | -6.437602000 | -0.318940000 | 3.350968000  |
| 6  | -0.734722000 | 8.492559000  | -1.673223000 |
| 1  | -1.686540000 | 8.944493000  | -1.374541000 |
| 1  | 0.072381000  | 9.067134000  | -1.202939000 |
| 1  | -0.632151000 | 8.627402000  | -2.757684000 |
| 79 | 1.550447000  | 0.517183000  | -0.772601000 |
| 15 | 3.289086000  | -0.980844000 | -0.102832000 |
| 6  | 4.787263000  | -0.770796000 | -1.127594000 |
| 6  | 2.914932000  | -2.763075000 | -0.194515000 |
| 6  | 3.859676000  | -0.694318000 | 1.605775000  |
| 6  | 5.573264000  | -1.845881000 | -1.547570000 |
| 6  | 5.156364000  | 0.532076000  | -1.478855000 |
| 6  | 3.304133000  | -3.671354000 | 0.791836000  |
| 6  | 2.185502000  | -3.210982000 | -1.300642000 |
| 6  | 5.171747000  | -0.974965000 | 2.002722000  |
| 6  | 2.943665000  | -0.206889000 | 2.542610000  |
| 6  | 6.716954000  | -1.617264000 | -2.307452000 |
| 1  | 5.289305000  | -2.863367000 | -1.282489000 |
| 6  | 6.302179000  | 0.756695000  | -2.231478000 |
| 1  | 4.532511000  | 1.369109000  | -1.163159000 |
| 6  | 2.955672000  | -5.013640000 | 0.676483000  |
| 1  | 3.866044000  | -3.326433000 | 1.658341000  |
| 6  | 1.841035000  | -4.552234000 | -1.412534000 |

|                                              |              |              |                             |
|----------------------------------------------|--------------|--------------|-----------------------------|
| 1                                            | 1.857782000  | -2.497242000 | -2.055892000                |
| 6                                            | 5.556746000  | -0.782326000 | 3.323928000                 |
| 1                                            | 5.892031000  | -1.345161000 | 1.273699000                 |
| 6                                            | 3.332716000  | -0.021666000 | 3.865728000                 |
| 1                                            | 1.927421000  | 0.045420000  | 2.235333000                 |
| 6                                            | 7.082257000  | -0.318979000 | -2.647868000                |
| 1                                            | 7.323409000  | -2.458453000 | -2.635115000                |
| 1                                            | 6.581617000  | 1.772186000  | -2.501769000                |
| 6                                            | 2.221477000  | -5.452643000 | -0.420752000                |
| 1                                            | 3.252203000  | -5.716717000 | 1.451329000                 |
| 1                                            | 1.251662000  | -4.888615000 | -2.262035000                |
| 6                                            | 4.636234000  | -0.308977000 | 4.255928000                 |
| 1                                            | 6.578512000  | -0.999453000 | 3.626615000                 |
| 1                                            | 2.614494000  | 0.362917000  | 4.586131000                 |
| 1                                            | 7.974672000  | -0.143895000 | -3.244199000                |
| 1                                            | 1.937073000  | -6.499171000 | -0.500205000                |
| 1                                            | 4.940301000  | -0.156470000 | 5.289006000                 |
| 8                                            | -5.270401000 | -1.102638000 | -0.214789000                |
| 16                                           | -4.390350000 | -2.232042000 | -0.028516000                |
| 9                                            | -4.300512000 | -4.547625000 | -1.290362000                |
| 9                                            | -5.904029000 | -3.236573000 | -1.873219000                |
| 9                                            | -3.890592000 | -2.831968000 | -2.538481000                |
| 6                                            | -4.627763000 | -3.304901000 | -1.547456000                |
| 8                                            | -1.725444000 | -3.889882000 | -0.364162000                |
| 8                                            | -0.550521000 | -1.805978000 | -1.239948000                |
| 16                                           | -1.415896000 | -2.479946000 | -0.300028000                |
| 9                                            | -0.493860000 | -0.870099000 | 1.526963000                 |
| 9                                            | -1.588913000 | -2.562662000 | 2.299934000                 |
| 9                                            | 0.400980000  | -2.831293000 | 1.493485000                 |
| 6                                            | -0.730866000 | -2.160592000 | 1.386248000                 |
| 7                                            | -2.837308000 | -1.598171000 | -0.236918000                |
| 8                                            | -4.410828000 | -3.104840000 | 1.118044000                 |
| Zero-point correction=                       |              |              | 0.753416 (Hartree/Particle) |
| Thermal correction to Energy=                |              |              | 0.809446                    |
| Thermal correction to Enthalpy=              |              |              | 0.810390                    |
| Thermal correction to Gibbs Free Energy=     |              |              | 0.662387                    |
| Sum of electronic and zero-point Energies=   |              |              | -4114.657803                |
| Sum of electronic and thermal Energies=      |              |              | -4114.601773                |
| Sum of electronic and thermal Enthalpies=    |              |              | -4114.600829                |
| Sum of electronic and thermal Free Energies= |              |              | -4114.748832                |

#### A-TSa5

|   |              |             |             |
|---|--------------|-------------|-------------|
| 6 | -0.347710000 | 1.362678000 | 4.344903000 |
| 6 | -1.095165000 | 1.090718000 | 3.200710000 |

|   |              |             |              |
|---|--------------|-------------|--------------|
| 6 | -0.669759000 | 1.596469000 | 1.978687000  |
| 6 | 0.502864000  | 2.382936000 | 1.903861000  |
| 6 | 1.248856000  | 2.641981000 | 3.053552000  |
| 6 | 0.816233000  | 2.127231000 | 4.273028000  |
| 1 | -0.676463000 | 0.969244000 | 5.304136000  |
| 1 | -1.982570000 | 0.464872000 | 3.254812000  |
| 1 | 2.157702000  | 3.236761000 | 3.002671000  |
| 1 | 1.386171000  | 2.331525000 | 5.176810000  |
| 6 | -1.260429000 | 1.357156000 | 0.608061000  |
| 6 | -0.571570000 | 2.460944000 | -0.259458000 |
| 6 | 0.729315000  | 2.672507000 | 0.497496000  |
| 1 | -2.347791000 | 1.528877000 | 0.637065000  |
| 6 | 1.798513000  | 2.731645000 | -0.337845000 |
| 6 | -1.442523000 | 3.723221000 | -0.265829000 |
| 6 | -2.744502000 | 3.655047000 | -0.774241000 |
| 6 | -0.975671000 | 4.956519000 | 0.184408000  |
| 6 | -3.546726000 | 4.785516000 | -0.823326000 |
| 1 | -3.138621000 | 2.706801000 | -1.141807000 |
| 6 | -1.787068000 | 6.086637000 | 0.135320000  |
| 1 | 0.036749000  | 5.041393000 | 0.576475000  |
| 6 | -3.084822000 | 6.022440000 | -0.365676000 |
| 1 | -4.555674000 | 4.708908000 | -1.228328000 |
| 1 | -1.401076000 | 7.039787000 | 0.496500000  |
| 6 | 1.313939000  | 2.487761000 | -1.705206000 |
| 6 | 2.011304000  | 2.456743000 | -2.909534000 |
| 6 | -0.070753000 | 2.220022000 | -1.671031000 |
| 6 | 1.321581000  | 2.123889000 | -4.076084000 |
| 1 | 3.074268000  | 2.690772000 | -2.939609000 |
| 6 | -0.749896000 | 1.898772000 | -2.833781000 |
| 1 | -1.896639000 | 0.067067000 | 0.236806000  |
| 6 | -0.038761000 | 1.829605000 | -4.035892000 |
| 1 | 1.851695000  | 2.100966000 | -5.026911000 |
| 1 | -1.817191000 | 1.689567000 | -2.815946000 |
| 1 | -0.560802000 | 1.559424000 | -4.950984000 |
| 6 | 3.210163000  | 2.869211000 | 0.030337000  |
| 6 | 3.619796000  | 3.854765000 | 0.936007000  |
| 6 | 4.180492000  | 2.011966000 | -0.507765000 |
| 6 | 4.953511000  | 3.968249000 | 1.312410000  |
| 1 | 2.877679000  | 4.553374000 | 1.321781000  |
| 6 | 5.513769000  | 2.131110000 | -0.138019000 |
| 1 | 3.876556000  | 1.228072000 | -1.201391000 |
| 6 | 5.905199000  | 3.106946000 | 0.775421000  |
| 1 | 5.252809000  | 4.743657000 | 2.014237000  |
| 1 | 6.250757000  | 1.450756000 | -0.559389000 |



|    |              |              |              |
|----|--------------|--------------|--------------|
| 1  | 6.950389000  | 3.199601000  | 1.062206000  |
| 6  | -3.970130000 | 7.232171000  | -0.392163000 |
| 1  | -4.594496000 | 7.253205000  | -1.292682000 |
| 1  | -4.649974000 | 7.248660000  | 0.469577000  |
| 1  | -3.385994000 | 8.158350000  | -0.363657000 |
| 79 | 0.100836000  | -0.423293000 | 0.157668000  |
| 15 | 1.874946000  | -1.906179000 | -0.008994000 |
| 6  | 1.445538000  | -3.547558000 | 0.640426000  |
| 6  | 3.299527000  | -1.278285000 | 0.933630000  |
| 6  | 2.456697000  | -2.154140000 | -1.713689000 |
| 6  | 2.318507000  | -4.307372000 | 1.421693000  |
| 6  | 0.171116000  | -4.040039000 | 0.341245000  |
| 6  | 4.602438000  | -1.718563000 | 0.676014000  |
| 6  | 3.078576000  | -0.311965000 | 1.920104000  |
| 6  | 3.049264000  | -3.350687000 | -2.126677000 |
| 6  | 2.319499000  | -1.095534000 | -2.617463000 |
| 6  | 1.915365000  | -5.552679000 | 1.893928000  |
| 1  | 3.305547000  | -3.921832000 | 1.673095000  |
| 6  | -0.227908000 | -5.281140000 | 0.817221000  |
| 1  | -0.519437000 | -3.441435000 | -0.254259000 |
| 6  | 5.665871000  | -1.211409000 | 1.413695000  |
| 1  | 4.783557000  | -2.451353000 | -0.110235000 |
| 6  | 4.147681000  | 0.206881000  | 2.640838000  |
| 1  | 2.069179000  | 0.054511000  | 2.117114000  |
| 6  | 3.518638000  | -3.476712000 | -3.429695000 |
| 1  | 3.132480000  | -4.185608000 | -1.431119000 |
| 6  | 2.797014000  | -1.225405000 | -3.915876000 |
| 1  | 1.830427000  | -0.167955000 | -2.312082000 |
| 6  | 0.645876000  | -6.037283000 | 1.594277000  |
| 1  | 2.592880000  | -6.141522000 | 2.507704000  |
| 1  | -1.230560000 | -5.638828000 | 0.598830000  |
| 6  | 5.438666000  | -0.246706000 | 2.392643000  |
| 1  | 6.676892000  | -1.558551000 | 1.213259000  |
| 1  | 3.964876000  | 0.985787000  | 3.378533000  |
| 6  | 3.396026000  | -2.414494000 | -4.321729000 |
| 1  | 3.974893000  | -4.409694000 | -3.751961000 |
| 1  | 2.680556000  | -0.394715000 | -4.609089000 |
| 1  | 0.330446000  | -7.004545000 | 1.978230000  |
| 1  | 6.275786000  | 0.166697000  | 2.950735000  |
| 1  | 3.760562000  | -2.519286000 | -5.340984000 |
| 8  | -1.878402000 | -1.862166000 | 2.103021000  |
| 16 | -3.004259000 | -2.055401000 | 1.203436000  |
| 9  | -5.565468000 | -1.535900000 | 1.437262000  |
| 9  | -4.600260000 | -2.280321000 | 3.219833000  |

|                                              |              |              |                             |
|----------------------------------------------|--------------|--------------|-----------------------------|
| 9                                            | -4.268354000 | -0.243280000 | 2.578798000                 |
| 6                                            | -4.474819000 | -1.488526000 | 2.169671000                 |
| 8                                            | -4.936775000 | -1.576232000 | -1.341925000                |
| 8                                            | -3.573005000 | 0.496094000  | -1.865117000                |
| 16                                           | -3.676124000 | -0.868032000 | -1.375545000                |
| 9                                            | -1.365076000 | -1.304408000 | -2.523806000                |
| 9                                            | -2.475304000 | -3.094322000 | -2.057086000                |
| 9                                            | -3.094811000 | -1.837049000 | -3.701100000                |
| 6                                            | -2.573520000 | -1.850320000 | -2.488060000                |
| 7                                            | -2.863130000 | -0.885687000 | 0.053296000                 |
| 8                                            | -3.328686000 | -3.364664000 | 0.672938000                 |
| Zero-point correction=                       |              |              | 0.747090 (Hartree/Particle) |
| Thermal correction to Energy=                |              |              | 0.803239                    |
| Thermal correction to Enthalpy=              |              |              | 0.804183                    |
| Thermal correction to Gibbs Free Energy=     |              |              | 0.655310                    |
| Sum of electronic and zero-point Energies=   |              |              | -4114.644709                |
| Sum of electronic and thermal Energies=      |              |              | -4114.588561                |
| Sum of electronic and thermal Enthalpies=    |              |              | -4114.587616                |
| Sum of electronic and thermal Free Energies= |              |              | -4114.736489                |

#### A-p1

|   |              |              |              |
|---|--------------|--------------|--------------|
| 6 | 0.927841000  | -1.906085000 | -3.050006000 |
| 6 | 0.795130000  | -0.645875000 | -2.460528000 |
| 6 | 1.811742000  | -0.183508000 | -1.640083000 |
| 6 | 2.960280000  | -0.969129000 | -1.402527000 |
| 6 | 3.106625000  | -2.202396000 | -2.034016000 |
| 6 | 2.078534000  | -2.665466000 | -2.853100000 |
| 1 | 0.130602000  | -2.292290000 | -3.683484000 |
| 1 | -0.072622000 | -0.018263000 | -2.660118000 |
| 1 | 3.998097000  | -2.806260000 | -1.874626000 |
| 1 | 2.167495000  | -3.642280000 | -3.324599000 |
| 6 | 1.935977000  | 1.147385000  | -0.938194000 |
| 6 | 2.912934000  | 0.808668000  | 0.215773000  |
| 6 | 3.797552000  | -0.210097000 | -0.484065000 |
| 1 | 2.418653000  | 1.875007000  | -1.606879000 |
| 6 | 5.114721000  | 0.081693000  | -0.331797000 |
| 6 | 2.187279000  | 0.192486000  | 1.414690000  |
| 6 | 0.950051000  | 0.671662000  | 1.849872000  |
| 6 | 2.773116000  | -0.841847000 | 2.151406000  |
| 6 | 0.287644000  | 0.093895000  | 2.931195000  |
| 1 | 0.481701000  | 1.517617000  | 1.352211000  |
| 6 | 2.116409000  | -1.412607000 | 3.234910000  |
| 1 | 3.755805000  | -1.212111000 | 1.858384000  |
| 6 | 0.850075000  | -0.973631000 | 3.630669000  |

|    |              |              |              |
|----|--------------|--------------|--------------|
| 1  | -0.685889000 | 0.491648000  | 3.219909000  |
| 1  | 2.591564000  | -2.229177000 | 3.779326000  |
| 6  | 5.214340000  | 1.339353000  | 0.427962000  |
| 6  | 6.329508000  | 2.050985000  | 0.861641000  |
| 6  | 3.918585000  | 1.816234000  | 0.708854000  |
| 6  | 6.134841000  | 3.241000000  | 1.560825000  |
| 1  | 7.335021000  | 1.681685000  | 0.667541000  |
| 6  | 3.730536000  | 2.980149000  | 1.430829000  |
| 1  | 0.976796000  | 1.579354000  | -0.639574000 |
| 6  | 4.851483000  | 3.704998000  | 1.841354000  |
| 1  | 6.997551000  | 3.810496000  | 1.899838000  |
| 1  | 2.726845000  | 3.325106000  | 1.674579000  |
| 1  | 4.722108000  | 4.634657000  | 2.390664000  |
| 6  | 6.246562000  | -0.664311000 | -0.886682000 |
| 6  | 6.290737000  | -2.058842000 | -0.768246000 |
| 6  | 7.300183000  | -0.016066000 | -1.543449000 |
| 6  | 7.344481000  | -2.787952000 | -1.305428000 |
| 1  | 5.490387000  | -2.561024000 | -0.223565000 |
| 6  | 8.353389000  | -0.745169000 | -2.081358000 |
| 1  | 7.272006000  | 1.066515000  | -1.653226000 |
| 6  | 8.379304000  | -2.132297000 | -1.965499000 |
| 1  | 7.363716000  | -3.870504000 | -1.200506000 |
| 1  | 9.157572000  | -0.227593000 | -2.599668000 |
| 1  | 9.206150000  | -2.700015000 | -2.385785000 |
| 6  | 0.112553000  | -1.651656000 | 4.745181000  |
| 1  | 0.797543000  | -2.017345000 | 5.518475000  |
| 1  | -0.611454000 | -0.978394000 | 5.216951000  |
| 1  | -0.450968000 | -2.519543000 | 4.372036000  |
| 79 | -1.704543000 | 0.186541000  | -0.100366000 |
| 15 | -2.038904000 | -2.078881000 | 0.207463000  |
| 6  | -3.384662000 | -2.624218000 | -0.892757000 |
| 6  | -2.587778000 | -2.412357000 | 1.912428000  |
| 6  | -0.672095000 | -3.237349000 | -0.087632000 |
| 6  | -4.410268000 | -3.469252000 | -0.465318000 |
| 6  | -3.351282000 | -2.189496000 | -2.222572000 |
| 6  | -2.436356000 | -3.678981000 | 2.486316000  |
| 6  | -3.198691000 | -1.389185000 | 2.643982000  |
| 6  | -0.871885000 | -4.459186000 | -0.736071000 |
| 6  | 0.580321000  | -2.923521000 | 0.445101000  |
| 6  | -5.394326000 | -3.874284000 | -1.362510000 |
| 1  | -4.445828000 | -3.806577000 | 0.569330000  |
| 6  | -4.331254000 | -2.603044000 | -3.115267000 |
| 1  | -2.558232000 | -1.516858000 | -2.553263000 |
| 6  | -2.908143000 | -3.920423000 | 3.772334000  |

|                                              |              |              |                             |
|----------------------------------------------|--------------|--------------|-----------------------------|
| 1                                            | -1.946844000 | -4.476087000 | 1.927826000                 |
| 6                                            | -3.667749000 | -1.635946000 | 3.929728000                 |
| 1                                            | -3.296182000 | -0.392511000 | 2.211861000                 |
| 6                                            | 0.177317000  | -5.367387000 | -0.834900000                |
| 1                                            | -1.846374000 | -4.702721000 | -1.156746000                |
| 6                                            | 1.619231000  | -3.839383000 | 0.349370000                 |
| 1                                            | 0.755072000  | -1.960984000 | 0.924121000                 |
| 6                                            | -5.354778000 | -3.443571000 | -2.684296000                |
| 1                                            | -6.196445000 | -4.525855000 | -1.024497000                |
| 1                                            | -4.302913000 | -2.259009000 | -4.146045000                |
| 6                                            | -3.524650000 | -2.900474000 | 4.492486000                 |
| 1                                            | -2.788997000 | -4.906632000 | 4.214700000                 |
| 1                                            | -4.138518000 | -0.834395000 | 4.493171000                 |
| 6                                            | 1.419154000  | -5.061532000 | -0.286053000                |
| 1                                            | 0.021697000  | -6.318381000 | -1.338996000                |
| 1                                            | 2.592465000  | -3.582093000 | 0.764627000                 |
| 1                                            | -6.127650000 | -3.758606000 | -3.381247000                |
| 1                                            | -3.887661000 | -3.090793000 | 5.499728000                 |
| 1                                            | 2.236578000  | -5.774877000 | -0.364039000                |
| 8                                            | -1.137854000 | 2.032029000  | -2.770455000                |
| 16                                           | -1.865903000 | 2.935049000  | -1.896215000                |
| 9                                            | -4.443524000 | 3.294071000  | -1.522760000                |
| 9                                            | -3.804366000 | 3.179555000  | -3.581814000                |
| 9                                            | -3.916088000 | 1.387359000  | -2.382507000                |
| 6                                            | -3.639052000 | 2.685973000  | -2.367333000                |
| 8                                            | -3.109592000 | 4.209292000  | 0.822569000                 |
| 8                                            | -1.985490000 | 2.336736000  | 2.094978000                 |
| 16                                           | -2.027766000 | 3.259408000  | 0.969757000                 |
| 9                                            | 0.498433000  | 3.785704000  | 0.313971000                 |
| 9                                            | -0.693337000 | 5.525741000  | 0.770872000                 |
| 9                                            | -0.024650000 | 4.226595000  | 2.353945000                 |
| 6                                            | -0.447910000 | 4.281118000  | 1.102268000                 |
| 7                                            | -1.777968000 | 2.313695000  | -0.370322000                |
| 8                                            | -1.637746000 | 4.366030000  | -1.910606000                |
| Zero-point correction=                       |              |              | 0.753577 (Hartree/Particle) |
| Thermal correction to Energy=                |              |              | 0.809700                    |
| Thermal correction to Enthalpy=              |              |              | 0.810644                    |
| Thermal correction to Gibbs Free Energy=     |              |              | 0.661532                    |
| Sum of electronic and zero-point Energies=   |              |              | -4114.705040                |
| Sum of electronic and thermal Energies=      |              |              | -4114.648917                |
| Sum of electronic and thermal Enthalpies=    |              |              | -4114.647973                |
| Sum of electronic and thermal Free Energies= |              |              | -4114.797084                |

**A-TSc1**

|   |              |              |              |
|---|--------------|--------------|--------------|
| 6 | 1.765570000  | 5.207788000  | -1.461106000 |
| 6 | 1.845052000  | 4.658610000  | -0.191613000 |
| 6 | 0.866475000  | 3.746471000  | 0.217533000  |
| 6 | -0.200553000 | 3.419147000  | -0.672309000 |
| 6 | -0.257028000 | 3.969902000  | -1.960966000 |
| 6 | 0.729137000  | 4.858886000  | -2.346135000 |
| 1 | 2.523301000  | 5.917973000  | -1.785510000 |
| 1 | 2.664755000  | 4.916982000  | 0.477393000  |
| 1 | -1.063960000 | 3.694081000  | -2.638466000 |
| 1 | 0.704128000  | 5.298335000  | -3.340517000 |
| 6 | 0.735687000  | 2.972026000  | 1.466449000  |
| 6 | -0.543067000 | 2.295115000  | 1.310891000  |
| 6 | -1.090954000 | 2.564724000  | 0.051467000  |
| 6 | -2.422044000 | 2.037579000  | -0.232211000 |
| 6 | -1.331254000 | 1.346067000  | 2.018110000  |
| 6 | -2.143879000 | 0.547126000  | 1.135829000  |
| 6 | -1.532191000 | 1.267810000  | 3.404295000  |
| 6 | -3.216546000 | -0.208632000 | 1.683724000  |
| 1 | -1.617677000 | 0.027898000  | 0.334854000  |
| 6 | -2.583603000 | 0.518364000  | 3.885111000  |
| 1 | -0.913517000 | 1.858694000  | 4.076769000  |
| 6 | -3.453038000 | -0.222851000 | 3.035295000  |
| 1 | -3.787756000 | -0.854137000 | 1.020760000  |
| 1 | -2.773038000 | 0.493872000  | 4.958427000  |
| 6 | -2.633735000 | 1.508480000  | -1.598401000 |
| 6 | -3.736008000 | 1.881795000  | -2.384148000 |
| 6 | -1.690992000 | 0.619666000  | -2.139253000 |
| 6 | -3.907776000 | 1.348440000  | -3.654140000 |
| 1 | -4.454101000 | 2.602533000  | -2.001920000 |
| 6 | -1.885499000 | 0.062247000  | -3.392528000 |
| 1 | -0.824634000 | 0.314750000  | -1.548742000 |
| 6 | -2.999292000 | 0.418201000  | -4.148803000 |
| 1 | -4.765081000 | 1.648274000  | -4.252218000 |
| 1 | -1.190466000 | -0.690514000 | -3.754540000 |
| 1 | -3.158990000 | -0.036265000 | -5.123767000 |
| 6 | -3.577251000 | 2.720818000  | 0.426489000  |
| 6 | -4.845040000 | 2.121136000  | 0.453249000  |
| 6 | -3.421029000 | 3.984781000  | 1.001582000  |
| 6 | -5.918934000 | 2.764428000  | 1.047309000  |
| 1 | -4.973320000 | 1.134102000  | 0.008125000  |
| 6 | -4.500966000 | 4.628397000  | 1.599982000  |
| 1 | -2.450171000 | 4.474548000  | 0.960816000  |
| 6 | -5.749737000 | 4.021897000  | 1.627014000  |
| 1 | -6.893446000 | 2.282079000  | 1.063910000  |

|    |              |              |              |
|----|--------------|--------------|--------------|
| 1  | -4.361620000 | 5.613514000  | 2.039091000  |
| 1  | -6.592811000 | 4.524980000  | 2.094740000  |
| 6  | -4.530226000 | -1.071744000 | 3.633811000  |
| 1  | -5.289566000 | -0.459848000 | 4.136790000  |
| 1  | -5.027894000 | -1.673208000 | 2.866470000  |
| 1  | -4.120314000 | -1.759522000 | 4.383355000  |
| 79 | 2.091318000  | 1.345876000  | 0.988414000  |
| 15 | 3.404794000  | -0.333216000 | 0.001218000  |
| 6  | 3.524923000  | -1.932939000 | 0.854229000  |
| 6  | 5.134181000  | 0.170109000  | -0.296756000 |
| 6  | 2.695152000  | -0.602640000 | -1.652643000 |
| 6  | 4.470551000  | -2.882910000 | 0.456569000  |
| 6  | 2.662978000  | -2.211872000 | 1.917917000  |
| 6  | 5.800317000  | -0.122444000 | -1.489331000 |
| 6  | 5.811635000  | 0.841754000  | 0.724904000  |
| 6  | 2.274299000  | -1.855109000 | -2.094771000 |
| 6  | 2.485596000  | 0.529523000  | -2.451455000 |
| 6  | 4.542224000  | -4.106880000 | 1.109597000  |
| 1  | 5.152320000  | -2.662632000 | -0.364319000 |
| 6  | 2.748011000  | -3.433565000 | 2.575782000  |
| 1  | 1.906645000  | -1.483487000 | 2.206826000  |
| 6  | 7.130724000  | 0.250308000  | -1.652975000 |
| 1  | 5.274052000  | -0.636148000 | -2.292785000 |
| 6  | 7.141758000  | 1.207986000  | 0.560200000  |
| 1  | 5.286413000  | 1.080482000  | 1.650274000  |
| 6  | 1.650622000  | -1.976512000 | -3.334091000 |
| 1  | 2.379565000  | -2.731258000 | -1.459147000 |
| 6  | 1.886315000  | 0.399506000  | -3.696706000 |
| 1  | 2.780853000  | 1.516859000  | -2.088820000 |
| 6  | 3.682517000  | -4.380264000 | 2.169526000  |
| 1  | 5.272537000  | -4.847400000 | 0.792728000  |
| 1  | 2.076999000  | -3.647053000 | 3.403712000  |
| 6  | 7.801178000  | 0.913301000  | -0.630220000 |
| 1  | 7.643929000  | 0.023372000  | -2.584553000 |
| 1  | 7.662657000  | 1.731098000  | 1.358620000  |
| 6  | 1.471694000  | -0.856394000 | -4.138836000 |
| 1  | 1.286821000  | -2.949691000 | -3.654902000 |
| 1  | 1.721423000  | 1.281633000  | -4.311029000 |
| 1  | 3.742382000  | -5.337769000 | 2.681555000  |
| 1  | 8.840041000  | 1.206483000  | -0.762635000 |
| 1  | 0.989052000  | -0.957812000 | -5.108898000 |
| 1  | 1.049384000  | 3.390537000  | 2.424178000  |
| 8  | 0.253642000  | -1.209642000 | 0.325697000  |
| 16 | -0.438117000 | -2.481595000 | 0.083292000  |

|                                              |              |              |                             |
|----------------------------------------------|--------------|--------------|-----------------------------|
| 9                                            | -2.309692000 | -3.215427000 | 1.843161000                 |
| 9                                            | -0.383013000 | -4.116064000 | 2.168537000                 |
| 9                                            | -0.703496000 | -2.046623000 | 2.682030000                 |
| 6                                            | -1.001550000 | -3.006091000 | 1.805196000                 |
| 8                                            | -2.357805000 | -3.048457000 | -2.998665000                |
| 8                                            | -2.603624000 | -4.579587000 | -1.012918000                |
| 16                                           | -2.581762000 | -3.235692000 | -1.571203000                |
| 9                                            | -4.361838000 | -1.279874000 | -1.562838000                |
| 9                                            | -5.126864000 | -3.240927000 | -2.039603000                |
| 9                                            | -4.630103000 | -2.743643000 | -0.000464000                |
| 6                                            | -4.278317000 | -2.574716000 | -1.274170000                |
| 7                                            | -1.786074000 | -2.135778000 | -0.687114000                |
| 8                                            | 0.337058000  | -3.607717000 | -0.419313000                |
| Zero-point correction=                       |              |              | 0.752324 (Hartree/Particle) |
| Thermal correction to Energy=                |              |              | 0.807535                    |
| Thermal correction to Enthalpy=              |              |              | 0.808479                    |
| Thermal correction to Gibbs Free Energy=     |              |              | 0.663721                    |
| Sum of electronic and zero-point Energies=   |              |              | -4114.616821                |
| Sum of electronic and thermal Energies=      |              |              | -4114.561610                |
| Sum of electronic and thermal Enthalpies=    |              |              | -4114.560666                |
| Sum of electronic and thermal Free Energies= |              |              | -4114.705424                |

### A-1c

|   |              |              |              |
|---|--------------|--------------|--------------|
| 6 | -2.359368000 | -5.119137000 | -0.209051000 |
| 6 | -2.304298000 | -4.272053000 | 0.883432000  |
| 6 | -1.190320000 | -3.436091000 | 1.039304000  |
| 6 | -0.129129000 | -3.505517000 | 0.080098000  |
| 6 | -0.213989000 | -4.355413000 | -1.037412000 |
| 6 | -1.329876000 | -5.154397000 | -1.173613000 |
| 1 | -3.222015000 | -5.770068000 | -0.335200000 |
| 1 | -3.120227000 | -4.235744000 | 1.603833000  |
| 1 | 0.590903000  | -4.369938000 | -1.770623000 |
| 1 | -1.420284000 | -5.824594000 | -2.024912000 |
| 6 | -0.900513000 | -2.400744000 | 2.047039000  |
| 6 | 0.462930000  | -1.998058000 | 1.697475000  |
| 6 | 0.882745000  | -2.619243000 | 0.523080000  |
| 6 | 2.218883000  | -2.146192000 | 0.023462000  |
| 6 | 1.462972000  | -1.114874000 | 2.124297000  |
| 6 | 2.459194000  | -0.956255000 | 1.040966000  |
| 6 | 1.624794000  | -0.412899000 | 3.327615000  |
| 6 | 3.772512000  | -0.434720000 | 1.442595000  |
| 1 | 2.068272000  | -0.037286000 | 0.537078000  |
| 6 | 2.815735000  | 0.233902000  | 3.545357000  |
| 1 | 0.839363000  | -0.423322000 | 4.079479000  |

|    |              |              |              |
|----|--------------|--------------|--------------|
| 6  | 3.919886000  | 0.212486000  | 2.628668000  |
| 1  | 4.577847000  | -0.408991000 | 0.712243000  |
| 1  | 2.953368000  | 0.784329000  | 4.476855000  |
| 6  | 2.040894000  | -1.669348000 | -1.424472000 |
| 6  | 2.595783000  | -2.335279000 | -2.518132000 |
| 6  | 1.218626000  | -0.563429000 | -1.668881000 |
| 6  | 2.383500000  | -1.867590000 | -3.813824000 |
| 1  | 3.211029000  | -3.219076000 | -2.364602000 |
| 6  | 1.033054000  | -0.077543000 | -2.954745000 |
| 1  | 0.720782000  | -0.047073000 | -0.846590000 |
| 6  | 1.620890000  | -0.727825000 | -4.035622000 |
| 1  | 2.837119000  | -2.393897000 | -4.651081000 |
| 1  | 0.443961000  | 0.825760000  | -3.101142000 |
| 1  | 1.487137000  | -0.342431000 | -5.043925000 |
| 6  | 3.326968000  | -3.178420000 | 0.211122000  |
| 6  | 4.611326000  | -2.915168000 | -0.283001000 |
| 6  | 3.120174000  | -4.361304000 | 0.920423000  |
| 6  | 5.653307000  | -3.807680000 | -0.071675000 |
| 1  | 4.786142000  | -2.009515000 | -0.862241000 |
| 6  | 4.165901000  | -5.256664000 | 1.134134000  |
| 1  | 2.131502000  | -4.592427000 | 1.311571000  |
| 6  | 5.434796000  | -4.984251000 | 0.640941000  |
| 1  | 6.640549000  | -3.584976000 | -0.470102000 |
| 1  | 3.979972000  | -6.173340000 | 1.689344000  |
| 1  | 6.249862000  | -5.685069000 | 0.805321000  |
| 6  | 5.163527000  | 0.971577000  | 2.972331000  |
| 1  | 5.473454000  | 0.798048000  | 4.009438000  |
| 1  | 5.993120000  | 0.697213000  | 2.314673000  |
| 1  | 4.992165000  | 2.049116000  | 2.852700000  |
| 79 | -2.140583000 | -0.814488000 | 1.241156000  |
| 15 | -3.561551000 | 0.525333000  | -0.088757000 |
| 6  | -3.697722000 | 2.315032000  | 0.176520000  |
| 6  | -5.270952000 | -0.106393000 | -0.066624000 |
| 6  | -2.999315000 | 0.308109000  | -1.811876000 |
| 6  | -4.921727000 | 2.989166000  | 0.184176000  |
| 6  | -2.502647000 | 3.025751000  | 0.315706000  |
| 6  | -6.069560000 | -0.090733000 | -1.212889000 |
| 6  | -5.800490000 | -0.572232000 | 1.139646000  |
| 6  | -2.941318000 | 1.364533000  | -2.722439000 |
| 6  | -2.631961000 | -0.980646000 | -2.219138000 |
| 6  | -4.940240000 | 4.372823000  | 0.328292000  |
| 1  | -5.855184000 | 2.438890000  | 0.076923000  |
| 6  | -2.528179000 | 4.408752000  | 0.439268000  |
| 1  | -1.550263000 | 2.498280000  | 0.306921000  |



|                                              |              |              |                             |
|----------------------------------------------|--------------|--------------|-----------------------------|
| 6                                            | -7.385009000 | -0.536919000 | -1.149481000                |
| 1                                            | -5.658286000 | 0.270411000  | -2.154966000                |
| 6                                            | -7.117635000 | -1.012990000 | 1.200450000                 |
| 1                                            | -5.171743000 | -0.590587000 | 2.030219000                 |
| 6                                            | -2.528976000 | 1.129126000  | -4.031898000                |
| 1                                            | -3.210195000 | 2.371534000  | -2.408258000                |
| 6                                            | -2.221596000 | -1.209259000 | -3.525225000                |
| 1                                            | -2.664006000 | -1.807556000 | -1.506685000                |
| 6                                            | -3.747717000 | 5.080644000  | 0.450113000                 |
| 1                                            | -5.891351000 | 4.900275000  | 0.338893000                 |
| 1                                            | -1.587928000 | 4.947985000  | 0.520438000                 |
| 6                                            | -7.908440000 | -0.997524000 | 0.055390000                 |
| 1                                            | -8.002798000 | -0.526946000 | -2.044278000                |
| 1                                            | -7.524709000 | -1.375529000 | 2.141327000                 |
| 6                                            | -2.170994000 | -0.153472000 | -4.432753000                |
| 1                                            | -2.478055000 | 1.955991000  | -4.735926000                |
| 1                                            | -1.916976000 | -2.208603000 | -3.827015000                |
| 1                                            | -3.769616000 | 6.163219000  | 0.552331000                 |
| 1                                            | -8.936642000 | -1.348718000 | 0.101126000                 |
| 1                                            | -1.835057000 | -0.330302000 | -5.452130000                |
| 1                                            | -1.184008000 | -2.570330000 | 3.087713000                 |
| 8                                            | 0.473053000  | 1.584495000  | 0.933213000                 |
| 16                                           | 1.226259000  | 2.684775000  | 0.315007000                 |
| 9                                            | 2.435959000  | 4.748264000  | 1.377551000                 |
| 9                                            | 0.559311000  | 4.209383000  | 2.303425000                 |
| 9                                            | 2.327252000  | 3.028485000  | 2.675998000                 |
| 6                                            | 1.677093000  | 3.740457000  | 1.757260000                 |
| 8                                            | 2.758654000  | 2.664853000  | -2.745730000                |
| 8                                            | 3.911101000  | 4.161253000  | -1.081214000                |
| 16                                           | 3.381353000  | 2.855690000  | -1.444912000                |
| 9                                            | 4.467658000  | 0.485019000  | -1.780500000                |
| 9                                            | 5.693139000  | 2.166187000  | -2.351748000                |
| 9                                            | 5.429605000  | 1.686779000  | -0.265382000                |
| 6                                            | 4.830867000  | 1.721120000  | -1.453021000                |
| 7                                            | 2.604637000  | 2.107544000  | -0.221361000                |
| 8                                            | 0.516592000  | 3.597297000  | -0.575658000                |
| Zero-point correction=                       |              |              | 0.751426 (Hartree/Particle) |
| Thermal correction to Energy=                |              |              | 0.807640                    |
| Thermal correction to Enthalpy=              |              |              | 0.808584                    |
| Thermal correction to Gibbs Free Energy=     |              |              | 0.658766                    |
| Sum of electronic and zero-point Energies=   |              |              | -4114.631462                |
| Sum of electronic and thermal Energies=      |              |              | -4114.575248                |
| Sum of electronic and thermal Enthalpies=    |              |              | -4114.574304                |
| Sum of electronic and thermal Free Energies= |              |              | -4114.724122                |

**A-TSc2**

|   |              |              |              |
|---|--------------|--------------|--------------|
| 6 | -1.960470000 | -5.091357000 | 0.287288000  |
| 6 | -1.923017000 | -4.106928000 | 1.263702000  |
| 6 | -0.854454000 | -3.203613000 | 1.281421000  |
| 6 | 0.188130000  | -3.341213000 | 0.317919000  |
| 6 | 0.124309000  | -4.323974000 | -0.680443000 |
| 6 | -0.953142000 | -5.191936000 | -0.689143000 |
| 1 | -2.790325000 | -5.794928000 | 0.269170000  |
| 1 | -2.724843000 | -4.018793000 | 1.996473000  |
| 1 | 0.913053000  | -4.392853000 | -1.428599000 |
| 1 | -1.022454000 | -5.965098000 | -1.451071000 |
| 6 | -0.600731000 | -2.019205000 | 2.136096000  |
| 6 | 0.733425000  | -1.600603000 | 1.698727000  |
| 6 | 1.170524000  | -2.356161000 | 0.633974000  |
| 6 | 2.464599000  | -1.875021000 | 0.033783000  |
| 6 | 1.735859000  | -0.646166000 | 2.019441000  |
| 6 | 2.778535000  | -0.672757000 | 1.013997000  |
| 6 | 1.875947000  | 0.149499000  | 3.164027000  |
| 6 | 4.080935000  | -0.241654000 | 1.451462000  |
| 1 | 2.586354000  | 0.516630000  | 0.368958000  |
| 6 | 3.103475000  | 0.714217000  | 3.424939000  |
| 1 | 1.046114000  | 0.250684000  | 3.860179000  |
| 6 | 4.236035000  | 0.501878000  | 2.596813000  |
| 1 | 4.943428000  | -0.410275000 | 0.812440000  |
| 1 | 3.232245000  | 1.317455000  | 4.324195000  |
| 6 | 2.092805000  | -1.454697000 | -1.405011000 |
| 6 | 2.729627000  | -1.932080000 | -2.549709000 |
| 6 | 0.958207000  | -0.645165000 | -1.576066000 |
| 6 | 2.268664000  | -1.585905000 | -3.820110000 |
| 1 | 3.582546000  | -2.599730000 | -2.465451000 |
| 6 | 0.504372000  | -0.296106000 | -2.837530000 |
| 1 | 0.400993000  | -0.294347000 | -0.706663000 |
| 6 | 1.158818000  | -0.768191000 | -3.971833000 |
| 1 | 2.787241000  | -1.971855000 | -4.695326000 |
| 1 | -0.369928000 | 0.346598000  | -2.929710000 |
| 1 | 0.802946000  | -0.497181000 | -4.963394000 |
| 6 | 3.584093000  | -2.909902000 | 0.131292000  |
| 6 | 4.848211000  | -2.662854000 | -0.421223000 |
| 6 | 3.401074000  | -4.110709000 | 0.820830000  |
| 6 | 5.881173000  | -3.583396000 | -0.299037000 |
| 1 | 5.028392000  | -1.740526000 | -0.966960000 |
| 6 | 4.435733000  | -5.034004000 | 0.946957000  |
| 1 | 2.434752000  | -4.333990000 | 1.266200000  |

|    |              |              |              |
|----|--------------|--------------|--------------|
| 6  | 5.679683000  | -4.777925000 | 0.386123000  |
| 1  | 6.849246000  | -3.365029000 | -0.744746000 |
| 1  | 4.259906000  | -5.960954000 | 1.488385000  |
| 1  | 6.486647000  | -5.500667000 | 0.481395000  |
| 6  | 5.557602000  | 1.088033000  | 2.991189000  |
| 1  | 5.824306000  | 0.819396000  | 4.020502000  |
| 1  | 6.361441000  | 0.742974000  | 2.333344000  |
| 1  | 5.534262000  | 2.184034000  | 2.939665000  |
| 79 | -2.031296000 | -0.687796000 | 1.227132000  |
| 15 | -3.684039000 | 0.324976000  | -0.127257000 |
| 6  | -3.783030000 | 2.138797000  | -0.148330000 |
| 6  | -5.371241000 | -0.257567000 | 0.236228000  |
| 6  | -3.347525000 | -0.177029000 | -1.849790000 |
| 6  | -4.949366000 | 2.850813000  | 0.135253000  |
| 6  | -2.594819000 | 2.823827000  | -0.418297000 |
| 6  | -6.357689000 | -0.308626000 | -0.752838000 |
| 6  | -5.690062000 | -0.612139000 | 1.549406000  |
| 6  | -3.594046000 | 0.668800000  | -2.935024000 |
| 6  | -2.813201000 | -1.451559000 | -2.072317000 |
| 6  | -4.918226000 | 4.242989000  | 0.148712000  |
| 1  | -5.878064000 | 2.324652000  | 0.349939000  |
| 6  | -2.568915000 | 4.210912000  | -0.406458000 |
| 1  | -1.682617000 | 2.271142000  | -0.638029000 |
| 6  | -7.648889000 | -0.707060000 | -0.427225000 |
| 1  | -6.113343000 | -0.039739000 | -1.779961000 |
| 6  | -6.984206000 | -1.006061000 | 1.872686000  |
| 1  | -4.914828000 | -0.581541000 | 2.315436000  |
| 6  | -3.312682000 | 0.239443000  | -4.228262000 |
| 1  | -3.994019000 | 1.667826000  | -2.765763000 |
| 6  | -2.535020000 | -1.875857000 | -3.365866000 |
| 1  | -2.600753000 | -2.108463000 | -1.226446000 |
| 6  | -3.733239000 | 4.920820000  | -0.118969000 |
| 1  | -5.825968000 | 4.798738000  | 0.372666000  |
| 1  | -1.629851000 | 4.719654000  | -0.612424000 |
| 6  | -7.962218000 | -1.054372000 | 0.884418000  |
| 1  | -8.412625000 | -0.750319000 | -1.200055000 |
| 1  | -7.226900000 | -1.281330000 | 2.896190000  |
| 6  | -2.783496000 | -1.030225000 | -4.443175000 |
| 1  | -3.499177000 | 0.903103000  | -5.069175000 |
| 1  | -2.096250000 | -2.858026000 | -3.525219000 |
| 1  | -3.715477000 | 6.008110000  | -0.101088000 |
| 1  | -8.972891000 | -1.367856000 | 1.135428000  |
| 1  | -2.551827000 | -1.356928000 | -5.454469000 |
| 1  | -0.825762000 | -2.084161000 | 3.203852000  |

|                                              |             |             |                             |
|----------------------------------------------|-------------|-------------|-----------------------------|
| 8                                            | 0.222204000 | 1.595744000 | 0.957136000                 |
| 16                                           | 1.021697000 | 2.560954000 | 0.216210000                 |
| 9                                            | 2.124734000 | 4.836921000 | 0.948449000                 |
| 9                                            | 0.253332000 | 4.341687000 | 1.899458000                 |
| 9                                            | 2.071559000 | 3.333670000 | 2.493202000                 |
| 6                                            | 1.413846000 | 3.863061000 | 1.471762000                 |
| 8                                            | 2.730064000 | 1.896422000 | -2.756139000                |
| 8                                            | 3.380180000 | 3.931103000 | -1.403269000                |
| 16                                           | 3.198836000 | 2.496693000 | -1.524351000                |
| 9                                            | 4.830904000 | 0.467300000 | -1.356013000                |
| 9                                            | 5.646327000 | 2.260663000 | -2.234139000                |
| 9                                            | 5.377826000 | 2.142958000 | -0.098622000                |
| 6                                            | 4.876449000 | 1.793145000 | -1.270428000                |
| 7                                            | 2.451881000 | 1.861531000 | -0.158082000                |
| 8                                            | 0.444860000 | 3.288944000 | -0.903578000                |
| Zero-point correction=                       |             |             | 0.751426 (Hartree/Particle) |
| Thermal correction to Energy=                |             |             | 0.807640                    |
| Thermal correction to Enthalpy=              |             |             | 0.808584                    |
| Thermal correction to Gibbs Free Energy=     |             |             | 0.658766                    |
| Sum of electronic and zero-point Energies=   |             |             | -4114.631462                |
| Sum of electronic and thermal Energies=      |             |             | -4114.575248                |
| Sum of electronic and thermal Enthalpies=    |             |             | -4114.574304                |
| Sum of electronic and thermal Free Energies= |             |             | -4114.724122                |

#### A-2c

|   |              |              |              |
|---|--------------|--------------|--------------|
| 6 | 0.508322000  | 3.428273000  | 3.185296000  |
| 6 | 0.063597000  | 3.268125000  | 1.876481000  |
| 6 | 0.810040000  | 2.497946000  | 0.989872000  |
| 6 | 2.031178000  | 1.899647000  | 1.412677000  |
| 6 | 2.461769000  | 2.064226000  | 2.732195000  |
| 6 | 1.692875000  | 2.819204000  | 3.609384000  |
| 1 | -0.067548000 | 4.032726000  | 3.883543000  |
| 1 | -0.863394000 | 3.736118000  | 1.540316000  |
| 1 | 3.385410000  | 1.606722000  | 3.076928000  |
| 1 | 2.024887000  | 2.947279000  | 4.637577000  |
| 6 | 0.539603000  | 2.160658000  | -0.436821000 |
| 6 | 1.737022000  | 1.397196000  | -0.802932000 |
| 6 | 2.593857000  | 1.242282000  | 0.252889000  |
| 6 | 3.935189000  | 0.675087000  | -0.195156000 |
| 6 | 2.345528000  | 0.890916000  | -2.014383000 |
| 6 | 3.637625000  | 0.432573000  | -1.684552000 |
| 6 | 1.886380000  | 0.817232000  | -3.324302000 |
| 6 | 4.458655000  | -0.093203000 | -2.663259000 |
| 1 | 1.900586000  | -1.522362000 | 0.507851000  |

|    |              |              |              |
|----|--------------|--------------|--------------|
| 6  | 2.721989000  | 0.275363000  | -4.299096000 |
| 1  | 0.888363000  | 1.173661000  | -3.577851000 |
| 6  | 4.004505000  | -0.182381000 | -3.989053000 |
| 1  | 5.466618000  | -0.435451000 | -2.420700000 |
| 1  | 2.376510000  | 0.209397000  | -5.330493000 |
| 6  | 4.313993000  | -0.583311000 | 0.583422000  |
| 6  | 4.832436000  | -0.467388000 | 1.879738000  |
| 6  | 4.126043000  | -1.867815000 | 0.067385000  |
| 6  | 5.133032000  | -1.590864000 | 2.634723000  |
| 1  | 5.016387000  | 0.523934000  | 2.290143000  |
| 6  | 4.418422000  | -3.001708000 | 0.829652000  |
| 1  | 3.770358000  | -1.987869000 | -0.954220000 |
| 6  | 4.919792000  | -2.866913000 | 2.115880000  |
| 1  | 5.530598000  | -1.470946000 | 3.639958000  |
| 1  | 4.245078000  | -3.986922000 | 0.403693000  |
| 1  | 5.150043000  | -3.747185000 | 2.710924000  |
| 6  | 5.051451000  | 1.728711000  | -0.133484000 |
| 6  | 6.392648000  | 1.335503000  | -0.182746000 |
| 6  | 4.761569000  | 3.094300000  | -0.118102000 |
| 6  | 7.413640000  | 2.277824000  | -0.208279000 |
| 1  | 6.642742000  | 0.275538000  | -0.187716000 |
| 6  | 5.783688000  | 4.038338000  | -0.142846000 |
| 1  | 3.724722000  | 3.423168000  | -0.083547000 |
| 6  | 7.113444000  | 3.636187000  | -0.186305000 |
| 1  | 8.449645000  | 1.947166000  | -0.241393000 |
| 1  | 5.533662000  | 5.096948000  | -0.123253000 |
| 1  | 7.911108000  | 4.375496000  | -0.200278000 |
| 6  | 4.904512000  | -0.740274000 | -5.051276000 |
| 1  | 5.764545000  | -0.082484000 | -5.231243000 |
| 1  | 5.308514000  | -1.718851000 | -4.764407000 |
| 1  | 4.377080000  | -0.861140000 | -6.003299000 |
| 79 | -1.338699000 | 1.171426000  | -0.510407000 |
| 15 | -3.615994000 | 0.474353000  | -0.387775000 |
| 6  | -4.120133000 | -1.051719000 | -1.242297000 |
| 6  | -4.736078000 | 1.766340000  | -1.020740000 |
| 6  | -4.094171000 | 0.231529000  | 1.356005000  |
| 6  | -5.331981000 | -1.178059000 | -1.925396000 |
| 6  | -3.249294000 | -2.142117000 | -1.165115000 |
| 6  | -5.979262000 | 2.026291000  | -0.438325000 |
| 6  | -4.342267000 | 2.479082000  | -2.157105000 |
| 6  | -4.909449000 | -0.822236000 | 1.771211000  |
| 6  | -3.552083000 | 1.104760000  | 2.305805000  |
| 6  | -5.664571000 | -2.390158000 | -2.522926000 |
| 1  | -6.013505000 | -0.331502000 | -1.993234000 |

|                                            |              |              |                             |
|--------------------------------------------|--------------|--------------|-----------------------------|
| 6                                          | -3.589762000 | -3.352973000 | -1.753741000                |
| 1                                          | -2.304373000 | -2.048458000 | -0.633454000                |
| 6                                          | -6.818591000 | 2.988267000  | -0.990826000                |
| 1                                          | -6.289182000 | 1.474002000  | 0.447947000                 |
| 6                                          | -5.185947000 | 3.435301000  | -2.709594000                |
| 1                                          | -3.365913000 | 2.284002000  | -2.601516000                |
| 6                                          | -5.169935000 | -1.006568000 | 3.126132000                 |
| 1                                          | -5.323808000 | -1.511929000 | 1.037279000                 |
| 6                                          | -3.815483000 | 0.917639000  | 3.656623000                 |
| 1                                          | -2.897839000 | 1.917336000  | 1.985992000                 |
| 6                                          | -4.797419000 | -3.475316000 | -2.436215000                |
| 1                                          | -6.606384000 | -2.486324000 | -3.058231000                |
| 1                                          | -2.905637000 | -4.194161000 | -1.674890000                |
| 6                                          | -6.423271000 | 3.690870000  | -2.125345000                |
| 1                                          | -7.784074000 | 3.189668000  | -0.532694000                |
| 1                                          | -4.874005000 | 3.988274000  | -3.592227000                |
| 6                                          | -4.620068000 | -0.142788000 | 4.067465000                 |
| 1                                          | -5.795212000 | -1.836538000 | 3.446391000                 |
| 1                                          | -3.377578000 | 1.591109000  | 4.389543000                 |
| 1                                          | -5.063446000 | -4.420115000 | -2.904664000                |
| 1                                          | -7.080967000 | 4.443878000  | -2.553121000                |
| 1                                          | -4.812284000 | -0.300138000 | 5.126145000                 |
| 1                                          | 0.357309000  | 3.029806000  | -1.085383000                |
| 8                                          | 1.854096000  | -1.258832000 | 3.016211000                 |
| 16                                         | 0.792083000  | -2.038759000 | 2.431254000                 |
| 9                                          | -1.667986000 | -1.525011000 | 1.768445000                 |
| 9                                          | -1.206612000 | -1.247021000 | 3.859075000                 |
| 9                                          | -0.528863000 | 0.202014000  | 2.411352000                 |
| 6                                          | -0.774144000 | -1.070372000 | 2.625423000                 |
| 8                                          | 1.677473000  | -4.264794000 | -0.234788000                |
| 8                                          | -0.767046000 | -3.678333000 | 0.104517000                 |
| 16                                         | 0.595915000  | -3.306291000 | -0.203157000                |
| 9                                          | 1.810083000  | -2.318442000 | -2.293813000                |
| 9                                          | -0.040097000 | -3.364626000 | -2.680362000                |
| 9                                          | -0.081195000 | -1.369353000 | -1.860954000                |
| 6                                          | 0.574221000  | -2.508440000 | -1.884249000                |
| 7                                          | 0.978132000  | -1.934684000 | 0.735953000                 |
| 8                                          | 0.487553000  | -3.401374000 | 2.799648000                 |
| Zero-point correction=                     |              |              | 0.752145 (Hartree/Particle) |
| Thermal correction to Energy=              |              |              | 0.808600                    |
| Thermal correction to Enthalpy=            |              |              | 0.809545                    |
| Thermal correction to Gibbs Free Energy=   |              |              | 0.660471                    |
| Sum of electronic and zero-point Energies= |              |              | -4114.657986                |
| Sum of electronic and thermal Energies=    |              |              | -4114.601531                |

|                                              |              |
|----------------------------------------------|--------------|
| Sum of electronic and thermal Enthalpies=    | -4114.600586 |
| Sum of electronic and thermal Free Energies= | -4114.749660 |

**A-TSc3**

|   |              |              |              |
|---|--------------|--------------|--------------|
| 6 | -1.092614000 | 2.959456000  | -4.072157000 |
| 6 | -0.981414000 | 3.458414000  | -2.780115000 |
| 6 | -1.286528000 | 2.628697000  | -1.703979000 |
| 6 | -1.706070000 | 1.285836000  | -1.929680000 |
| 6 | -1.781648000 | 0.791429000  | -3.232217000 |
| 6 | -1.481679000 | 1.635090000  | -4.295467000 |
| 1 | -0.868259000 | 3.603794000  | -4.919469000 |
| 1 | -0.659708000 | 4.484575000  | -2.606051000 |
| 1 | -2.078167000 | -0.240617000 | -3.416941000 |
| 1 | -1.559025000 | 1.262442000  | -5.314614000 |
| 6 | -1.232686000 | 2.891945000  | -0.261771000 |
| 6 | -1.780511000 | 1.740897000  | 0.341473000  |
| 6 | -1.966310000 | 0.674235000  | -0.611204000 |
| 6 | -3.155999000 | -0.199124000 | -0.109851000 |
| 6 | -2.461175000 | 1.413447000  | 1.576980000  |
| 6 | -3.253747000 | 0.274290000  | 1.344495000  |
| 6 | -2.498904000 | 2.063512000  | 2.809219000  |
| 6 | -4.087190000 | -0.206682000 | 2.341038000  |
| 1 | 0.224148000  | 2.895112000  | -0.010118000 |
| 6 | -3.323513000 | 1.554984000  | 3.804290000  |
| 1 | -1.884559000 | 2.942728000  | 2.982078000  |
| 6 | -4.125706000 | 0.428362000  | 3.587661000  |
| 1 | -4.731680000 | -1.067470000 | 2.155908000  |
| 1 | -3.360477000 | 2.046250000  | 4.775702000  |
| 6 | -2.891253000 | -1.694655000 | -0.276775000 |
| 6 | -2.950632000 | -2.259670000 | -1.556553000 |
| 6 | -2.518557000 | -2.519186000 | 0.786345000  |
| 6 | -2.624496000 | -3.592366000 | -1.768254000 |
| 1 | -3.271013000 | -1.639111000 | -2.392412000 |
| 6 | -2.185930000 | -3.856687000 | 0.575904000  |
| 1 | -2.473280000 | -2.108314000 | 1.793193000  |
| 6 | -2.235695000 | -4.398898000 | -0.701192000 |
| 1 | -2.671799000 | -4.006314000 | -2.773786000 |
| 1 | -1.882098000 | -4.472610000 | 1.421023000  |
| 1 | -1.965448000 | -5.439534000 | -0.868315000 |
| 6 | -4.493470000 | 0.205439000  | -0.755642000 |
| 6 | -5.566876000 | -0.691543000 | -0.774082000 |
| 6 | -4.711281000 | 1.501598000  | -1.227429000 |
| 6 | -6.810989000 | -0.310665000 | -1.264282000 |
| 1 | -5.427607000 | -1.706759000 | -0.406519000 |

|    |              |              |              |
|----|--------------|--------------|--------------|
| 6  | -5.953851000 | 1.882323000  | -1.721890000 |
| 1  | -3.904631000 | 2.230528000  | -1.215076000 |
| 6  | -7.009771000 | 0.978324000  | -1.745416000 |
| 1  | -7.627434000 | -1.029730000 | -1.271180000 |
| 1  | -6.092643000 | 2.895477000  | -2.092371000 |
| 1  | -7.980511000 | 1.277032000  | -2.134325000 |
| 6  | -5.047304000 | -0.073400000 | 4.658308000  |
| 1  | -5.031089000 | -1.167441000 | 4.723796000  |
| 1  | -4.781412000 | 0.330496000  | 5.640568000  |
| 1  | -6.085544000 | 0.217966000  | 4.453504000  |
| 79 | -0.096483000 | -0.460391000 | -0.294158000 |
| 15 | 1.666559000  | -2.007747000 | -0.040650000 |
| 6  | 3.326600000  | -1.600992000 | -0.665325000 |
| 6  | 1.238968000  | -3.546069000 | -0.926284000 |
| 6  | 1.919294000  | -2.491267000 | 1.699250000  |
| 6  | 4.165613000  | -2.582434000 | -1.205285000 |
| 6  | 3.792323000  | -0.293483000 | -0.521966000 |
| 6  | 1.363852000  | -4.808489000 | -0.345639000 |
| 6  | 0.832318000  | -3.433423000 | -2.259717000 |
| 6  | 3.148390000  | -2.976291000 | 2.154740000  |
| 6  | 0.842890000  | -2.393059000 | 2.585734000  |
| 6  | 5.462870000  | -2.252589000 | -1.579495000 |
| 1  | 3.803975000  | -3.602150000 | -1.330048000 |
| 6  | 5.092503000  | 0.030955000  | -0.892263000 |
| 1  | 3.137922000  | 0.480505000  | -0.124990000 |
| 6  | 1.096885000  | -5.949559000 | -1.097566000 |
| 1  | 1.676560000  | -4.900638000 | 0.693506000  |
| 6  | 0.578524000  | -4.574608000 | -3.009709000 |
| 1  | 0.705604000  | -2.445815000 | -2.707030000 |
| 6  | 3.292302000  | -3.368703000 | 3.480950000  |
| 1  | 3.994958000  | -3.039593000 | 1.472195000  |
| 6  | 0.990452000  | -2.788608000 | 3.909950000  |
| 1  | -0.107291000 | -1.992769000 | 2.230663000  |
| 6  | 5.926961000  | -0.949379000 | -1.418349000 |
| 1  | 6.113547000  | -3.015713000 | -2.000223000 |
| 1  | 5.432116000  | 1.056443000  | -0.775067000 |
| 6  | 0.712115000  | -5.833929000 | -2.429545000 |
| 1  | 1.197659000  | -6.931779000 | -0.641503000 |
| 1  | 0.267868000  | -4.481150000 | -4.047767000 |
| 6  | 2.214745000  | -3.276791000 | 4.357091000  |
| 1  | 4.251555000  | -3.740432000 | 3.833001000  |
| 1  | 0.151632000  | -2.703420000 | 4.596352000  |
| 1  | 6.942980000  | -0.696114000 | -1.712199000 |
| 1  | 0.510641000  | -6.726824000 | -3.016891000 |



|                                              |              |              |                             |
|----------------------------------------------|--------------|--------------|-----------------------------|
| 1                                            | 2.332466000  | -3.577952000 | 5.395347000                 |
| 1                                            | -1.363556000 | 3.882148000  | 0.176079000                 |
| 8                                            | 0.166739000  | 3.705695000  | 2.404614000                 |
| 16                                           | 1.491706000  | 3.305483000  | 1.971129000                 |
| 9                                            | 2.811356000  | 1.053951000  | 2.213824000                 |
| 9                                            | 1.875263000  | 1.780658000  | 4.018830000                 |
| 9                                            | 0.672665000  | 0.876355000  | 2.471847000                 |
| 6                                            | 1.734517000  | 1.631909000  | 2.714285000                 |
| 8                                            | 2.619254000  | 4.865442000  | -0.913602000                |
| 8                                            | 3.943541000  | 2.882605000  | -0.063451000                |
| 16                                           | 2.717399000  | 3.458045000  | -0.586284000                |
| 9                                            | 1.848833000  | 3.372155000  | -3.065637000                |
| 9                                            | 3.577269000  | 2.169292000  | -2.659198000                |
| 9                                            | 1.632408000  | 1.481836000  | -2.037860000                |
| 6                                            | 2.397063000  | 2.548071000  | -2.202146000                |
| 7                                            | 1.414866000  | 2.947880000  | 0.351592000                 |
| 8                                            | 2.670113000  | 4.073014000  | 2.305997000                 |
| Zero-point correction=                       |              |              | 0.748170 (Hartree/Particle) |
| Thermal correction to Energy=                |              |              | 0.803823                    |
| Thermal correction to Enthalpy=              |              |              | 0.804767                    |
| Thermal correction to Gibbs Free Energy=     |              |              | 0.657979                    |
| Sum of electronic and zero-point Energies=   |              |              | -4114.648651                |
| Sum of electronic and thermal Energies=      |              |              | -4114.592998                |
| Sum of electronic and thermal Enthalpies=    |              |              | -4114.592054                |
| Sum of electronic and thermal Free Energies= |              |              | -4114.738841                |

### A-p2

|   |              |              |              |
|---|--------------|--------------|--------------|
| 6 | -1.310313000 | -2.716042000 | -4.547154000 |
| 6 | -0.454902000 | -2.715286000 | -3.440736000 |
| 6 | -0.946279000 | -2.306658000 | -2.214505000 |
| 6 | -2.292224000 | -1.884224000 | -2.078186000 |
| 6 | -3.140110000 | -1.890728000 | -3.183284000 |
| 6 | -2.637503000 | -2.311476000 | -4.413880000 |
| 1 | -0.938545000 | -3.039676000 | -5.516572000 |
| 1 | 0.581860000  | -3.032397000 | -3.538538000 |
| 1 | -4.174557000 | -1.565929000 | -3.091684000 |
| 1 | -3.291065000 | -2.322306000 | -5.283545000 |
| 6 | -0.237187000 | -2.204926000 | -0.886370000 |
| 6 | -1.303852000 | -1.624555000 | -0.022215000 |
| 6 | -2.467276000 | -1.464547000 | -0.697975000 |
| 6 | -3.584905000 | -0.988631000 | 0.213257000  |
| 6 | -1.457889000 | -1.208816000 | 1.352389000  |
| 6 | -2.793082000 | -0.779990000 | 1.515805000  |
| 6 | -0.568716000 | -1.193332000 | 2.419322000  |

|    |              |              |              |
|----|--------------|--------------|--------------|
| 6  | -3.222037000 | -0.327708000 | 2.747780000  |
| 1  | 0.670463000  | -1.581650000 | -0.936796000 |
| 6  | -1.022050000 | -0.743204000 | 3.657734000  |
| 1  | 0.456544000  | -1.535737000 | 2.299289000  |
| 6  | -2.337850000 | -0.314578000 | 3.839958000  |
| 1  | -4.248547000 | 0.012106000  | 2.894650000  |
| 1  | -0.333396000 | -0.726681000 | 4.502493000  |
| 6  | -4.585813000 | -2.149831000 | 0.334181000  |
| 6  | -5.617352000 | -2.280597000 | -0.600435000 |
| 6  | -4.438607000 | -3.144741000 | 1.302826000  |
| 6  | -6.481063000 | -3.369038000 | -0.564346000 |
| 1  | -5.756859000 | -1.511342000 | -1.359042000 |
| 6  | -5.303519000 | -4.233630000 | 1.340139000  |
| 1  | -3.639855000 | -3.067598000 | 2.037886000  |
| 6  | -6.328737000 | -4.351140000 | 0.408408000  |
| 1  | -7.277814000 | -3.447676000 | -1.300838000 |
| 1  | -5.172521000 | -4.994653000 | 2.106426000  |
| 1  | -7.004905000 | -5.202290000 | 0.440205000  |
| 6  | -4.273059000 | 0.294999000  | -0.230426000 |
| 6  | -5.403033000 | 0.756311000  | 0.455691000  |
| 6  | -3.803621000 | 1.043903000  | -1.308155000 |
| 6  | -6.027019000 | 1.941501000  | 0.089289000  |
| 1  | -5.812661000 | 0.161794000  | 1.271013000  |
| 6  | -4.434213000 | 2.228915000  | -1.686147000 |
| 1  | -2.935736000 | 0.699418000  | -1.866098000 |
| 6  | -5.543086000 | 2.687248000  | -0.985115000 |
| 1  | -6.905712000 | 2.278149000  | 0.635641000  |
| 1  | -4.046785000 | 2.789110000  | -2.536787000 |
| 1  | -6.040324000 | 3.608379000  | -1.281112000 |
| 6  | -2.822135000 | 0.134600000  | 5.186031000  |
| 1  | -3.385304000 | 1.074450000  | 5.116931000  |
| 1  | -3.495146000 | -0.605305000 | 5.638230000  |
| 1  | -1.990004000 | 0.288569000  | 5.881917000  |
| 79 | 1.831792000  | 0.557681000  | 0.338128000  |
| 15 | 0.482054000  | 2.383185000  | -0.046238000 |
| 6  | -0.252336000 | 2.362024000  | -1.710987000 |
| 6  | 1.516477000  | 3.884379000  | -0.016277000 |
| 6  | -0.849219000 | 2.670698000  | 1.152537000  |
| 6  | -0.691795000 | 3.547413000  | -2.311268000 |
| 6  | -0.377506000 | 1.153721000  | -2.399189000 |
| 6  | 1.054031000  | 5.092256000  | 0.511257000  |
| 6  | 2.793845000  | 3.812846000  | -0.584193000 |
| 6  | -2.117566000 | 3.104825000  | 0.765711000  |
| 6  | -0.552474000 | 2.505478000  | 2.509812000  |

|                                          |              |              |                             |
|------------------------------------------|--------------|--------------|-----------------------------|
| 6                                        | -1.271639000 | 3.512163000  | -3.573607000                |
| 1                                        | -0.572439000 | 4.498105000  | -1.792389000                |
| 6                                        | -0.954751000 | 1.119702000  | -3.665457000                |
| 1                                        | -0.032199000 | 0.227931000  | -1.942331000                |
| 6                                        | 1.863376000  | 6.223211000  | 0.464401000                 |
| 1                                        | 0.064068000  | 5.147868000  | 0.962703000                 |
| 6                                        | 3.594184000  | 4.947499000  | -0.630233000                |
| 1                                        | 3.169118000  | 2.867790000  | -0.981744000                |
| 6                                        | -3.083064000 | 3.377405000  | 1.729894000                 |
| 1                                        | -2.365620000 | 3.220138000  | -0.286980000                |
| 6                                        | -1.513672000 | 2.798470000  | 3.467823000                 |
| 1                                        | 0.427072000  | 2.135355000  | 2.815241000                 |
| 6                                        | -1.405903000 | 2.299403000  | -4.248479000                |
| 1                                        | -1.611445000 | 4.435383000  | -4.037202000                |
| 1                                        | -1.052551000 | 0.167089000  | -4.184591000                |
| 6                                        | 3.129778000  | 6.151167000  | -0.106823000                |
| 1                                        | 1.503100000  | 7.161821000  | 0.878700000                 |
| 1                                        | 4.587532000  | 4.886247000  | -1.067311000                |
| 6                                        | -2.777547000 | 3.235820000  | 3.078368000                 |
| 1                                        | -4.077789000 | 3.683800000  | 1.412388000                 |
| 1                                        | -1.279770000 | 2.668522000  | 4.522428000                 |
| 1                                        | -1.855022000 | 2.277775000  | -5.238638000                |
| 1                                        | 3.761790000  | 7.035579000  | -0.136922000                |
| 1                                        | -3.531252000 | 3.454826000  | 3.832226000                 |
| 1                                        | 0.104963000  | -3.185584000 | -0.525034000                |
| 8                                        | 2.674768000  | -1.083798000 | 2.799367000                 |
| 16                                       | 3.677072000  | -1.623719000 | 1.892109000                 |
| 9                                        | 4.009707000  | -4.004346000 | 0.841540000                 |
| 9                                        | 3.344186000  | -3.980325000 | 2.894574000                 |
| 9                                        | 1.961721000  | -3.505646000 | 1.305247000                 |
| 6                                        | 3.221556000  | -3.406622000 | 1.711677000                 |
| 8                                        | 4.530330000  | 0.422894000  | -1.314616000                |
| 8                                        | 5.565432000  | -1.787387000 | -0.621919000                |
| 16                                       | 4.409755000  | -0.947044000 | -0.843859000                |
| 9                                        | 2.409617000  | -1.043599000 | -2.561584000                |
| 9                                        | 4.246274000  | -1.970951000 | -3.205684000                |
| 9                                        | 2.979842000  | -2.964677000 | -1.765690000                |
| 6                                        | 3.437795000  | -1.793132000 | -2.177770000                |
| 7                                        | 3.315241000  | -0.996281000 | 0.403321000                 |
| 8                                        | 5.084978000  | -1.592842000 | 2.217153000                 |
| Zero-point correction=                   |              |              | 0.753262 (Hartree/Particle) |
| Thermal correction to Energy=            |              |              | 0.809265                    |
| Thermal correction to Enthalpy=          |              |              | 0.810210                    |
| Thermal correction to Gibbs Free Energy= |              |              | 0.663254                    |

|                                              |              |
|----------------------------------------------|--------------|
| Sum of electronic and zero-point Energies=   | -4114.702947 |
| Sum of electronic and thermal Energies=      | -4114.646944 |
| Sum of electronic and thermal Enthalpies=    | -4114.646000 |
| Sum of electronic and thermal Free Energies= | -4114.792956 |

**A-TSb3**

|   |              |              |              |
|---|--------------|--------------|--------------|
| 6 | -1.932753000 | -2.349210000 | -4.111773000 |
| 6 | -1.071772000 | -1.810070000 | -3.158274000 |
| 6 | -1.606115000 | -1.346925000 | -1.958977000 |
| 6 | -2.995741000 | -1.424886000 | -1.726974000 |
| 6 | -3.842792000 | -1.983935000 | -2.670508000 |
| 6 | -3.303110000 | -2.439105000 | -3.873555000 |
| 1 | -1.527778000 | -2.712922000 | -5.053793000 |
| 1 | -0.000203000 | -1.749970000 | -3.341290000 |
| 1 | -4.913260000 | -2.062493000 | -2.479610000 |
| 1 | -3.956339000 | -2.869208000 | -4.629489000 |
| 6 | -0.914482000 | -0.754208000 | -0.786865000 |
| 6 | -1.910624000 | -0.468056000 | 0.117230000  |
| 6 | -3.259344000 | -0.925528000 | -0.343311000 |
| 1 | -3.520718000 | -1.774361000 | 0.312732000  |
| 6 | -4.177349000 | 0.276501000  | 0.056763000  |
| 6 | -2.105001000 | 0.334288000  | 1.304765000  |
| 6 | -1.219544000 | 0.817663000  | 2.268114000  |
| 6 | -3.464186000 | 0.706095000  | 1.343026000  |
| 6 | -1.715973000 | 1.606457000  | 3.296987000  |
| 1 | -0.158319000 | 0.578970000  | 2.222990000  |
| 6 | -3.946987000 | 1.486387000  | 2.379206000  |
| 1 | 0.070760000  | -1.631391000 | -0.357903000 |
| 6 | -3.075987000 | 1.932641000  | 3.380129000  |
| 1 | -1.034723000 | 1.978322000  | 4.062195000  |
| 1 | -4.999714000 | 1.766637000  | 2.417226000  |
| 6 | -5.642311000 | -0.062132000 | 0.281540000  |
| 6 | -6.562111000 | 0.982771000  | 0.440342000  |
| 6 | -6.118361000 | -1.370898000 | 0.365890000  |
| 6 | -7.902225000 | 0.729116000  | 0.698793000  |
| 1 | -6.218077000 | 2.011390000  | 0.337581000  |
| 6 | -7.464759000 | -1.628737000 | 0.614857000  |
| 1 | -5.443746000 | -2.213014000 | 0.228693000  |
| 6 | -8.360979000 | -0.582338000 | 0.788299000  |
| 1 | -8.594427000 | 1.559472000  | 0.820002000  |
| 1 | -7.809863000 | -2.658777000 | 0.669127000  |
| 1 | -9.411533000 | -0.785206000 | 0.982759000  |
| 6 | -4.029443000 | 1.369787000  | -1.014079000 |
| 6 | -3.191057000 | 2.476848000  | -0.863361000 |

|    |              |              |              |
|----|--------------|--------------|--------------|
| 6  | -4.730275000 | 1.233430000  | -2.217570000 |
| 6  | -3.056357000 | 3.413398000  | -1.886784000 |
| 1  | -2.635240000 | 2.622787000  | 0.061490000  |
| 6  | -4.593134000 | 2.162644000  | -3.239058000 |
| 1  | -5.395724000 | 0.382712000  | -2.351632000 |
| 6  | -3.752398000 | 3.260656000  | -3.078421000 |
| 1  | -2.406312000 | 4.274449000  | -1.740464000 |
| 1  | -5.146430000 | 2.028433000  | -4.165747000 |
| 1  | -3.646064000 | 3.992896000  | -3.875535000 |
| 6  | -3.597151000 | 2.743781000  | 4.527213000  |
| 1  | -4.053576000 | 2.098456000  | 5.288988000  |
| 1  | -2.798336000 | 3.310899000  | 5.016531000  |
| 1  | -4.369572000 | 3.450138000  | 4.202988000  |
| 79 | 0.732012000  | 0.573430000  | -0.756248000 |
| 15 | 2.571156000  | 1.909251000  | -0.184074000 |
| 6  | 2.563407000  | 1.932835000  | 1.644145000  |
| 6  | 2.591862000  | 3.652454000  | -0.697611000 |
| 6  | 4.169360000  | 1.174907000  | -0.642881000 |
| 6  | 2.492273000  | 3.116939000  | 2.376864000  |
| 6  | 2.535526000  | 0.700366000  | 2.312887000  |
| 6  | 3.775881000  | 4.393227000  | -0.742665000 |
| 6  | 1.374159000  | 4.268841000  | -1.000245000 |
| 6  | 5.297414000  | 1.282924000  | 0.176944000  |
| 6  | 4.236339000  | 0.429133000  | -1.822818000 |
| 6  | 2.394005000  | 3.072097000  | 3.765922000  |
| 1  | 2.507426000  | 4.077571000  | 1.864201000  |
| 6  | 2.441242000  | 0.662196000  | 3.697544000  |
| 1  | 2.577318000  | -0.233852000 | 1.750174000  |
| 6  | 3.739333000  | 5.740090000  | -1.083474000 |
| 1  | 4.727428000  | 3.913543000  | -0.516953000 |
| 6  | 1.342234000  | 5.618124000  | -1.335196000 |
| 1  | 0.453925000  | 3.683303000  | -0.976941000 |
| 6  | 6.482559000  | 0.656046000  | -0.189485000 |
| 1  | 5.242158000  | 1.841049000  | 1.111311000  |
| 6  | 5.423785000  | -0.196161000 | -2.184500000 |
| 1  | 3.344520000  | 0.300398000  | -2.433921000 |
| 6  | 2.367862000  | 1.848799000  | 4.425992000  |
| 1  | 2.337962000  | 3.999154000  | 4.331642000  |
| 1  | 2.418184000  | -0.298397000 | 4.206747000  |
| 6  | 2.523500000  | 6.352284000  | -1.377319000 |
| 1  | 4.662261000  | 6.313668000  | -1.121938000 |
| 1  | 0.393808000  | 6.094589000  | -1.571820000 |
| 6  | 6.544488000  | -0.084390000 | -1.367293000 |
| 1  | 7.356860000  | 0.734479000  | 0.452217000  |

|                                              |              |              |                             |
|----------------------------------------------|--------------|--------------|-----------------------------|
| 1                                            | 5.462053000  | -0.794035000 | -3.091620000                |
| 1                                            | 2.288817000  | 1.816125000  | 5.510039000                 |
| 1                                            | 2.498426000  | 7.405583000  | -1.646458000                |
| 1                                            | 7.468721000  | -0.586946000 | -1.642714000                |
| 8                                            | 2.052108000  | -1.951314000 | -2.082369000                |
| 16                                           | 1.956630000  | -3.091433000 | -1.181671000                |
| 9                                            | 3.598026000  | -4.051217000 | 0.625104000                 |
| 9                                            | 4.535801000  | -3.194189000 | -1.120541000                |
| 9                                            | 3.688467000  | -1.907378000 | 0.390037000                 |
| 6                                            | 3.551125000  | -3.063811000 | -0.247008000                |
| 8                                            | -1.292224000 | -3.480660000 | 1.015888000                 |
| 8                                            | 0.695312000  | -5.058744000 | 0.961087000                 |
| 16                                           | 0.136787000  | -3.725995000 | 1.011809000                 |
| 9                                            | 0.329809000  | -1.731142000 | 2.695918000                 |
| 9                                            | 0.236061000  | -3.693178000 | 3.595856000                 |
| 9                                            | 2.057989000  | -3.014209000 | 2.656969000                 |
| 6                                            | 0.734639000  | -2.990736000 | 2.595226000                 |
| 7                                            | 0.841875000  | -2.669366000 | -0.045109000                |
| 8                                            | 1.819534000  | -4.438475000 | -1.686567000                |
| Zero-point correction=                       |              |              | 0.748083 (Hartree/Particle) |
| Thermal correction to Energy=                |              |              | 0.803759                    |
| Thermal correction to Enthalpy=              |              |              | 0.804703                    |
| Thermal correction to Gibbs Free Energy=     |              |              | 0.657086                    |
| Sum of electronic and zero-point Energies=   |              |              | -4114.639934                |
| Sum of electronic and thermal Energies=      |              |              | -4114.584257                |
| Sum of electronic and thermal Enthalpies=    |              |              | -4114.583313                |
| Sum of electronic and thermal Free Energies= |              |              | -4114.730930                |

### A-3b

|   |              |              |              |
|---|--------------|--------------|--------------|
| 6 | -1.036108000 | 0.377319000  | -4.668030000 |
| 6 | -0.393284000 | -0.313278000 | -3.643649000 |
| 6 | -1.154340000 | -0.743137000 | -2.560599000 |
| 6 | -2.542255000 | -0.483336000 | -2.499632000 |
| 6 | -3.174227000 | 0.178533000  | -3.540641000 |
| 6 | -2.408178000 | 0.621348000  | -4.620182000 |
| 1 | -0.457594000 | 0.725946000  | -5.520772000 |
| 1 | 0.678003000  | -0.499794000 | -3.670289000 |
| 1 | -4.249787000 | 0.353254000  | -3.521553000 |
| 1 | -2.890342000 | 1.154314000  | -5.436623000 |
| 6 | -0.727101000 | -1.459811000 | -1.336832000 |
| 6 | -1.856251000 | -1.659517000 | -0.567348000 |
| 6 | -3.078699000 | -1.181697000 | -1.285365000 |
| 1 | -3.513369000 | -2.132368000 | -1.648038000 |
| 6 | -4.021371000 | -0.710284000 | -0.140683000 |

|    |              |              |              |
|----|--------------|--------------|--------------|
| 6  | -2.289856000 | -2.195852000 | 0.701045000  |
| 6  | -1.641704000 | -3.020423000 | 1.618980000  |
| 6  | -3.605608000 | -1.741810000 | 0.922411000  |
| 6  | -2.348313000 | -3.420624000 | 2.744215000  |
| 1  | -0.619987000 | -3.352257000 | 1.432265000  |
| 6  | -4.300663000 | -2.172121000 | 2.040007000  |
| 1  | 0.231646000  | -1.962145000 | -1.197991000 |
| 6  | -3.676230000 | -3.023643000 | 2.960067000  |
| 1  | -1.872286000 | -4.074958000 | 3.473257000  |
| 1  | -5.327240000 | -1.849915000 | 2.215229000  |
| 6  | -5.505489000 | -0.755446000 | -0.471691000 |
| 6  | -6.422929000 | -0.207003000 | 0.433268000  |
| 6  | -6.002246000 | -1.332010000 | -1.641769000 |
| 6  | -7.789112000 | -0.261993000 | 0.191728000  |
| 1  | -6.053407000 | 0.285393000  | 1.332358000  |
| 6  | -7.371706000 | -1.379248000 | -1.891303000 |
| 1  | -5.323548000 | -1.740458000 | -2.388120000 |
| 6  | -8.270637000 | -0.851863000 | -0.973650000 |
| 1  | -8.481234000 | 0.167536000  | 0.912597000  |
| 1  | -7.732676000 | -1.829005000 | -2.813436000 |
| 1  | -9.339697000 | -0.889523000 | -1.168488000 |
| 6  | -3.630709000 | 0.701841000  | 0.313834000  |
| 6  | -3.152378000 | 0.975709000  | 1.598100000  |
| 6  | -3.795521000 | 1.771784000  | -0.572726000 |
| 6  | -2.858688000 | 2.281259000  | 1.983432000  |
| 1  | -3.022207000 | 0.167764000  | 2.315674000  |
| 6  | -3.465615000 | 3.068754000  | -0.200311000 |
| 1  | -4.200541000 | 1.587497000  | -1.564815000 |
| 6  | -3.000555000 | 3.330734000  | 1.085500000  |
| 1  | -2.509746000 | 2.475101000  | 2.995121000  |
| 1  | -3.595806000 | 3.881262000  | -0.911851000 |
| 1  | -2.750271000 | 4.346272000  | 1.387842000  |
| 6  | -4.422520000 | -3.523181000 | 4.159681000  |
| 1  | -4.786258000 | -4.545997000 | 3.997522000  |
| 1  | -3.782680000 | -3.549123000 | 5.048830000  |
| 1  | -5.293700000 | -2.898753000 | 4.382971000  |
| 79 | -0.169596000 | 0.328273000  | -0.017238000 |
| 15 | 1.189837000  | 2.147622000  | 0.625575000  |
| 6  | 2.530747000  | 1.713871000  | 1.772080000  |
| 6  | 0.447357000  | 3.626799000  | 1.402430000  |
| 6  | 1.945603000  | 2.722003000  | -0.924377000 |
| 6  | 3.277502000  | 2.731808000  | 2.382061000  |
| 6  | 2.828542000  | 0.376540000  | 2.036333000  |
| 6  | 0.300450000  | 4.832077000  | 0.715621000  |

|                               |              |              |                             |
|-------------------------------|--------------|--------------|-----------------------------|
| 6                             | 0.040566000  | 3.541257000  | 2.738057000                 |
| 6                             | 3.328500000  | 2.798431000  | -1.082592000                |
| 6                             | 1.102557000  | 2.966741000  | -2.014239000                |
| 6                             | 4.310679000  | 2.409921000  | 3.250040000                 |
| 1                             | 3.044257000  | 3.776369000  | 2.177668000                 |
| 6                             | 3.862088000  | 0.062164000  | 2.915454000                 |
| 1                             | 2.274648000  | -0.421575000 | 1.539430000                 |
| 6                             | -0.248056000 | 5.939211000  | 1.358553000                 |
| 1                             | 0.624582000  | 4.912615000  | -0.319859000                |
| 6                             | -0.495327000 | 4.649645000  | 3.379475000                 |
| 1                             | 0.153605000  | 2.601484000  | 3.279570000                 |
| 6                             | 3.864169000  | 3.124174000  | -2.324099000                |
| 1                             | 3.987760000  | 2.565313000  | -0.248925000                |
| 6                             | 1.642728000  | 3.311479000  | -3.245407000                |
| 1                             | 0.019954000  | 2.864417000  | -1.902747000                |
| 6                             | 4.598090000  | 1.073324000  | 3.520166000                 |
| 1                             | 4.889045000  | 3.201345000  | 3.720625000                 |
| 1                             | 4.095494000  | -0.978945000 | 3.116003000                 |
| 6                             | -0.643926000 | 5.851433000  | 2.688349000                 |
| 1                             | -0.354538000 | 6.876581000  | 0.817758000                 |
| 1                             | -0.799737000 | 4.577124000  | 4.421180000                 |
| 6                             | 3.025074000  | 3.384793000  | -3.401252000                |
| 1                             | 4.943336000  | 3.159980000  | -2.451135000                |
| 1                             | 0.984850000  | 3.499424000  | -4.090380000                |
| 1                             | 5.404452000  | 0.820789000  | 4.204836000                 |
| 1                             | -1.063733000 | 6.719697000  | 3.190782000                 |
| 1                             | 3.448807000  | 3.630523000  | -4.372091000                |
| 8                             | 2.334140000  | -0.037380000 | -1.889412000                |
| 16                            | 2.979277000  | -1.342710000 | -1.748166000                |
| 9                             | 5.397629000  | -2.005530000 | -0.982814000                |
| 9                             | 5.281637000  | -0.253359000 | -2.246520000                |
| 9                             | 4.686226000  | -0.137798000 | -0.177340000                |
| 6                             | 4.702776000  | -0.916081000 | -1.254981000                |
| 8                             | 1.093567000  | -4.126224000 | 0.119792000                 |
| 8                             | 3.392949000  | -4.381471000 | -0.883146000                |
| 16                            | 2.437647000  | -3.604002000 | -0.114559000                |
| 9                             | 2.336020000  | -2.799743000 | 2.376538000                 |
| 9                             | 3.363946000  | -4.672433000 | 2.071108000                 |
| 9                             | 4.320125000  | -2.814825000 | 1.515351000                 |
| 6                             | 3.162682000  | -3.465890000 | 1.569214000                 |
| 7                             | 2.347136000  | -2.025806000 | -0.443044000                |
| 8                             | 3.101398000  | -2.194936000 | -2.918577000                |
| Zero-point correction=        |              |              | 0.752628 (Hartree/Particle) |
| Thermal correction to Energy= |              |              | 0.809107                    |



|                                              |              |
|----------------------------------------------|--------------|
| Thermal correction to Enthalpy=              | 0.810051     |
| Thermal correction to Gibbs Free Energy=     | 0.660182     |
| Sum of electronic and zero-point Energies=   | -4114.673367 |
| Sum of electronic and thermal Energies=      | -4114.616888 |
| Sum of electronic and thermal Enthalpies=    | -4114.615944 |
| Sum of electronic and thermal Free Energies= | -4114.765812 |

#### A-TSb4

|   |              |              |              |
|---|--------------|--------------|--------------|
| 6 | 0.689443000  | -4.279955000 | 0.855449000  |
| 6 | 0.396617000  | -3.578496000 | -0.306320000 |
| 6 | 0.643080000  | -2.205798000 | -0.341224000 |
| 6 | 1.218831000  | -1.546964000 | 0.774754000  |
| 6 | 1.504839000  | -2.264105000 | 1.935247000  |
| 6 | 1.225288000  | -3.623961000 | 1.970320000  |
| 1 | 0.497191000  | -5.349708000 | 0.902857000  |
| 1 | -0.039902000 | -4.080524000 | -1.169239000 |
| 1 | 1.950337000  | -1.762644000 | 2.790132000  |
| 1 | 1.439566000  | -4.190460000 | 2.873747000  |
| 6 | 0.284572000  | -1.205202000 | -1.371219000 |
| 6 | 0.739963000  | 0.040091000  | -0.840343000 |
| 6 | 1.412468000  | -0.131154000 | 0.404612000  |
| 6 | 1.336376000  | 1.208488000  | 1.185346000  |
| 6 | 0.559952000  | 1.445790000  | -1.109726000 |
| 6 | 0.970178000  | 2.156298000  | 0.030953000  |
| 6 | 0.049044000  | 2.104173000  | -2.227792000 |
| 6 | 0.923996000  | 3.542875000  | 0.021858000  |
| 1 | 2.708247000  | -0.192670000 | -0.142262000 |
| 6 | -0.012622000 | 3.488739000  | -2.210167000 |
| 1 | -0.282033000 | 1.536424000  | -3.097006000 |
| 6 | 0.439567000  | 4.221563000  | -1.101283000 |
| 1 | 1.265623000  | 4.114436000  | 0.884943000  |
| 1 | -0.402404000 | 4.027011000  | -3.072950000 |
| 6 | 2.634495000  | 1.552249000  | 1.908240000  |
| 6 | 2.850377000  | 1.095633000  | 3.211112000  |
| 6 | 3.665980000  | 2.230745000  | 1.261547000  |
| 6 | 4.062055000  | 1.318588000  | 3.851071000  |
| 1 | 2.059141000  | 0.554229000  | 3.728777000  |
| 6 | 4.886208000  | 2.445690000  | 1.896099000  |
| 1 | 3.537766000  | 2.575100000  | 0.237292000  |
| 6 | 5.086112000  | 1.994178000  | 3.194708000  |
| 1 | 4.212241000  | 0.947171000  | 4.862298000  |
| 1 | 5.684208000  | 2.946364000  | 1.353936000  |
| 1 | 6.041645000  | 2.154783000  | 3.688333000  |
| 6 | 0.140529000  | 1.288979000  | 2.154289000  |

|    |              |              |              |
|----|--------------|--------------|--------------|
| 6  | 0.005802000  | 2.432625000  | 2.954638000  |
| 6  | -0.851492000 | 0.314259000  | 2.243833000  |
| 6  | -1.087541000 | 2.604145000  | 3.790425000  |
| 1  | 0.784615000  | 3.192498000  | 2.933374000  |
| 6  | -1.949195000 | 0.480675000  | 3.089938000  |
| 1  | -0.764154000 | -0.605610000 | 1.669166000  |
| 6  | -2.078411000 | 1.627077000  | 3.859534000  |
| 1  | -1.162334000 | 3.503935000  | 4.397866000  |
| 1  | -2.709496000 | -0.298624000 | 3.140528000  |
| 1  | -2.941604000 | 1.760876000  | 4.507889000  |
| 6  | 0.415714000  | 5.720095000  | -1.126925000 |
| 1  | -0.379034000 | 6.100001000  | -1.778016000 |
| 1  | 0.267974000  | 6.138776000  | -0.125141000 |
| 1  | 1.364466000  | 6.121311000  | -1.505949000 |
| 79 | -1.817656000 | -0.822748000 | -0.916484000 |
| 15 | -4.024447000 | -0.320060000 | -0.284012000 |
| 6  | -4.691088000 | -1.545044000 | 0.889963000  |
| 6  | -5.242643000 | -0.256345000 | -1.635962000 |
| 6  | -4.067970000 | 1.302026000  | 0.541802000  |
| 6  | -6.067374000 | -1.711984000 | 1.075001000  |
| 6  | -3.795701000 | -2.331245000 | 1.623320000  |
| 6  | -6.186991000 | 0.765568000  | -1.748222000 |
| 6  | -5.230991000 | -1.297256000 | -2.570866000 |
| 6  | -5.066652000 | 1.636403000  | 1.461739000  |
| 6  | -3.053817000 | 2.222022000  | 0.255876000  |
| 6  | -6.538658000 | -2.633031000 | 2.003707000  |
| 1  | -6.770975000 | -1.128449000 | 0.481657000  |
| 6  | -4.271661000 | -3.249256000 | 2.553205000  |
| 1  | -2.720680000 | -2.234084000 | 1.457468000  |
| 6  | -7.116240000 | 0.740194000  | -2.784360000 |
| 1  | -6.194059000 | 1.582650000  | -1.028705000 |
| 6  | -6.163727000 | -1.320641000 | -3.599124000 |
| 1  | -4.486254000 | -2.089666000 | -2.488449000 |
| 6  | -5.052578000 | 2.881625000  | 2.079769000  |
| 1  | -5.847406000 | 0.917226000  | 1.706895000  |
| 6  | -3.039700000 | 3.462656000  | 0.882168000  |
| 1  | -2.253625000 | 1.963680000  | -0.440099000 |
| 6  | -5.641734000 | -3.396828000 | 2.745591000  |
| 1  | -7.609453000 | -2.759644000 | 2.143570000  |
| 1  | -3.569317000 | -3.855886000 | 3.119001000  |
| 6  | -7.106486000 | -0.300738000 | -3.706272000 |
| 1  | -7.848797000 | 1.538944000  | -2.871256000 |
| 1  | -6.151269000 | -2.131904000 | -4.322650000 |
| 6  | -4.038661000 | 3.791720000  | 1.792820000  |

|                                              |              |              |                             |
|----------------------------------------------|--------------|--------------|-----------------------------|
| 1                                            | -5.829019000 | 3.137334000  | 2.796876000                 |
| 1                                            | -2.230353000 | 4.158621000  | 0.668534000                 |
| 1                                            | -6.013703000 | -4.118433000 | 3.468960000                 |
| 1                                            | -7.832451000 | -0.316284000 | -4.515536000                |
| 1                                            | -4.022031000 | 4.758426000  | 2.290914000                 |
| 1                                            | 0.278221000  | -1.431587000 | -2.439597000                |
| 8                                            | 4.166949000  | -1.325256000 | 1.785340000                 |
| 16                                           | 4.933749000  | -1.226944000 | 0.559335000                 |
| 9                                            | 5.628880000  | -3.019983000 | -1.236210000                |
| 9                                            | 5.585039000  | -3.707630000 | 0.807213000                 |
| 9                                            | 3.740626000  | -3.405542000 | -0.272356000                |
| 6                                            | 4.971856000  | -2.956405000 | -0.097189000                |
| 8                                            | 5.515710000  | 1.632186000  | -1.227063000                |
| 8                                            | 5.697401000  | -0.527480000 | -2.519595000                |
| 16                                           | 4.924063000  | 0.397561000  | -1.712759000                |
| 9                                            | 3.016332000  | 2.076115000  | -2.335833000                |
| 9                                            | 4.120301000  | 1.259437000  | -3.991571000                |
| 9                                            | 2.634625000  | 0.050479000  | -3.002331000                |
| 6                                            | 3.567944000  | 0.976771000  | -2.826001000                |
| 7                                            | 4.018303000  | -0.409085000 | -0.554395000                |
| 8                                            | 6.316083000  | -0.788576000 | 0.560559000                 |
| Zero-point correction=                       |              |              | 0.744600 (Hartree/Particle) |
| Thermal correction to Energy=                |              |              | 0.800772                    |
| Thermal correction to Enthalpy=              |              |              | 0.801716                    |
| Thermal correction to Gibbs Free Energy=     |              |              | 0.651847                    |
| Sum of electronic and zero-point Energies=   |              |              | -4114.641800                |
| Sum of electronic and thermal Energies=      |              |              | -4114.585628                |
| Sum of electronic and thermal Enthalpies=    |              |              | -4114.584683                |
| Sum of electronic and thermal Free Energies= |              |              | -4114.734553                |

### TSa3-1

|   |              |              |              |
|---|--------------|--------------|--------------|
| 6 | -1.029694000 | -0.464217000 | -4.642571000 |
| 6 | -0.278570000 | 0.383469000  | -3.843645000 |
| 6 | -0.854153000 | 0.903930000  | -2.682729000 |
| 6 | -2.184285000 | 0.564914000  | -2.344985000 |
| 6 | -2.911070000 | -0.347702000 | -3.122364000 |
| 6 | -2.330865000 | -0.843244000 | -4.276080000 |
| 1 | -0.598856000 | -0.859567000 | -5.560277000 |
| 1 | 0.747191000  | 0.640928000  | -4.106518000 |
| 1 | -3.915206000 | -0.645572000 | -2.828931000 |
| 1 | -2.886003000 | -1.534403000 | -4.905503000 |
| 6 | -0.271611000 | 1.808301000  | -1.668049000 |
| 6 | -1.380725000 | 2.104197000  | -0.740021000 |
| 6 | -2.496011000 | 1.223690000  | -1.100640000 |

|    |              |              |              |
|----|--------------|--------------|--------------|
| 1  | 0.184767000  | 2.717040000  | -2.082782000 |
| 6  | -3.448567000 | 0.956001000  | -0.117274000 |
| 6  | -2.904465000 | 1.261879000  | 1.158486000  |
| 6  | -3.630190000 | 1.589758000  | 2.324268000  |
| 6  | -1.466235000 | 1.362389000  | 1.152792000  |
| 6  | -2.962332000 | 2.114854000  | 3.404592000  |
| 1  | -4.713746000 | 1.492787000  | 2.326393000  |
| 6  | -0.822451000 | 1.975400000  | 2.268155000  |
| 1  | -0.935233000 | 0.500619000  | 0.738249000  |
| 6  | -1.560869000 | 2.336568000  | 3.365782000  |
| 1  | -3.518944000 | 2.405137000  | 4.292810000  |
| 1  | 0.264046000  | 2.046575000  | 2.274181000  |
| 1  | -1.067059000 | 2.748033000  | 4.243288000  |
| 6  | -4.794547000 | 0.444513000  | -0.342435000 |
| 6  | -5.568262000 | 0.933648000  | -1.407530000 |
| 6  | -5.356022000 | -0.521560000 | 0.498212000  |
| 6  | -6.853082000 | 0.476127000  | -1.622304000 |
| 1  | -5.144850000 | 1.693073000  | -2.064412000 |
| 6  | -6.647389000 | -0.990035000 | 0.293879000  |
| 1  | -4.746041000 | -0.947624000 | 1.292270000  |
| 6  | -7.402391000 | -0.489640000 | -0.769804000 |
| 1  | -7.465402000 | 0.850127000  | -2.438567000 |
| 1  | -7.045968000 | -1.755598000 | 0.952247000  |
| 79 | 1.505932000  | 0.945612000  | -0.824382000 |
| 15 | 3.671798000  | 0.217408000  | -0.190164000 |
| 6  | 4.464107000  | 1.228051000  | 1.109139000  |
| 6  | 4.802837000  | 0.369694000  | -1.618269000 |
| 6  | 3.829013000  | -1.511585000 | 0.334447000  |
| 6  | 5.730866000  | 1.791553000  | 0.936976000  |
| 6  | 3.775524000  | 1.425256000  | 2.312873000  |
| 6  | 5.811320000  | -0.563178000 | -1.869924000 |
| 6  | 4.677014000  | 1.487581000  | -2.449282000 |
| 6  | 4.711511000  | -1.905359000 | 1.341956000  |
| 6  | 3.084026000  | -2.469662000 | -0.356522000 |
| 6  | 6.302290000  | 2.547853000  | 1.956424000  |
| 1  | 6.275108000  | 1.641159000  | 0.005986000  |
| 6  | 4.357614000  | 2.174530000  | 3.327801000  |
| 1  | 2.799306000  | 0.964777000  | 2.457682000  |
| 6  | 6.681694000  | -0.377011000 | -2.939857000 |
| 1  | 5.912892000  | -1.437395000 | -1.228837000 |
| 6  | 5.553837000  | 1.675799000  | -3.510483000 |
| 1  | 3.885507000  | 2.212840000  | -2.256256000 |
| 6  | 4.849939000  | -3.254825000 | 1.647009000  |
| 1  | 5.287221000  | -1.159544000 | 1.887856000  |

|    |               |              |              |
|----|---------------|--------------|--------------|
| 6  | 3.235849000   | -3.816424000 | -0.054863000 |
| 1  | 2.366823000   | -2.151033000 | -1.114747000 |
| 6  | 5.617661000   | 2.740265000  | 3.151023000  |
| 1  | 7.288151000   | 2.984755000  | 1.814361000  |
| 1  | 3.823356000   | 2.315704000  | 4.264541000  |
| 6  | 6.555962000   | 0.740996000  | -3.757788000 |
| 1  | 7.461241000   | -1.110148000 | -3.133355000 |
| 1  | 5.451025000   | 2.549007000  | -4.150320000 |
| 6  | 4.117925000   | -4.207928000 | 0.946733000  |
| 1  | 5.528987000   | -3.561684000 | 2.439047000  |
| 1  | 2.638549000   | -4.555382000 | -0.581033000 |
| 1  | 6.067341000   | 3.329480000  | 3.947040000  |
| 1  | 7.238090000   | 0.883096000  | -4.592778000 |
| 1  | 4.222384000   | -5.261490000 | 1.194366000  |
| 8  | -2.725220000  | -1.873012000 | -0.237481000 |
| 16 | -1.567396000  | -2.585074000 | 0.289972000  |
| 9  | 0.255380000   | -4.069481000 | -0.840758000 |
| 9  | -1.680966000  | -4.126972000 | -1.796139000 |
| 9  | -0.408053000  | -2.400125000 | -2.040383000 |
| 6  | -0.797673000  | -3.344405000 | -1.195602000 |
| 8  | 1.133762000   | -2.959978000 | 2.194682000  |
| 8  | 1.266740000   | -0.449478000 | 2.099518000  |
| 16 | 0.473611000   | -1.678726000 | 2.015759000  |
| 9  | -1.915772000  | -1.099316000 | 3.055136000  |
| 9  | -0.863156000  | -2.679803000 | 4.075957000  |
| 9  | -0.243867000  | -0.632497000 | 4.324431000  |
| 6  | -0.721997000  | -1.523031000 | 3.464843000  |
| 7  | -0.432128000  | -1.511360000 | 0.697523000  |
| 8  | -1.767203000  | -3.667290000 | 1.243508000  |
| 8  | -8.665139000  | -0.874105000 | -1.058835000 |
| 6  | -9.262691000  | -1.853390000 | -0.242080000 |
| 1  | -10.266745000 | -2.015443000 | -0.638751000 |
| 1  | -8.707405000  | -2.801086000 | -0.272910000 |
| 1  | -9.338860000  | -1.518634000 | 0.801975000  |
| 6  | -1.546679000  | 3.596758000  | -0.479760000 |
| 6  | -2.740020000  | 4.152327000  | 0.275006000  |
| 1  | -1.560237000  | 4.044799000  | -1.488191000 |
| 1  | -0.611129000  | 3.953189000  | -0.019019000 |
| 6  | -2.783886000  | 5.672935000  | 0.181240000  |
| 1  | -3.676871000  | 3.737764000  | -0.130708000 |
| 1  | -2.708222000  | 3.867933000  | 1.333818000  |
| 6  | -3.955534000  | 6.263281000  | 0.946705000  |
| 1  | -1.838553000  | 6.087248000  | 0.564057000  |
| 1  | -2.836871000  | 5.973502000  | -0.876198000 |

|                                              |              |             |                             |
|----------------------------------------------|--------------|-------------|-----------------------------|
| 1                                            | -3.984330000 | 7.355496000 | 0.873329000                 |
| 1                                            | -4.909105000 | 5.878506000 | 0.563716000                 |
| 1                                            | -3.902470000 | 6.001627000 | 2.010961000                 |
| Zero-point correction=                       |              |             | 0.787507 (Hartree/Particle) |
| Thermal correction to Energy=                |              |             | 0.845209                    |
| Thermal correction to Enthalpy=              |              |             | 0.846154                    |
| Thermal correction to Gibbs Free Energy=     |              |             | 0.694377                    |
| Sum of electronic and zero-point Energies=   |              |             | -4116.020405                |
| Sum of electronic and thermal Energies=      |              |             | -4115.962703                |
| Sum of electronic and thermal Enthalpies=    |              |             | -4115.961759                |
| Sum of electronic and thermal Free Energies= |              |             | -4116.113535                |

### TSa3'-1

|   |              |              |              |
|---|--------------|--------------|--------------|
| 6 | -0.840937000 | -3.711260000 | -3.170359000 |
| 6 | -0.255249000 | -2.456137000 | -3.145100000 |
| 6 | -0.996630000 | -1.372404000 | -2.668829000 |
| 6 | -2.327235000 | -1.568417000 | -2.232227000 |
| 6 | -2.893306000 | -2.850733000 | -2.214243000 |
| 6 | -2.146712000 | -3.910984000 | -2.693492000 |
| 1 | -0.275191000 | -4.561632000 | -3.545281000 |
| 1 | 0.774419000  | -2.309690000 | -3.472633000 |
| 1 | -3.899543000 | -3.007019000 | -1.832029000 |
| 1 | -2.571455000 | -4.911816000 | -2.697634000 |
| 6 | -0.588251000 | 0.038152000  | -2.496847000 |
| 6 | -1.792542000 | 0.725088000  | -1.986067000 |
| 6 | -2.803062000 | -0.306617000 | -1.723983000 |
| 1 | -0.190140000 | 0.507280000  | -3.406720000 |
| 6 | -3.782211000 | -0.004384000 | -0.777766000 |
| 6 | -3.338390000 | 1.075602000  | 0.021833000  |
| 6 | -4.134387000 | 1.966819000  | 0.769786000  |
| 6 | -1.915564000 | 1.306173000  | -0.076697000 |
| 6 | -3.571737000 | 3.101168000  | 1.302657000  |
| 1 | -5.203211000 | 1.785197000  | 0.861897000  |
| 6 | -1.379558000 | 2.526679000  | 0.412291000  |
| 1 | -1.285935000 | 0.437757000  | 0.140619000  |
| 6 | -2.190139000 | 3.396876000  | 1.108296000  |
| 1 | -4.200503000 | 3.802415000  | 1.844076000  |
| 1 | -0.306223000 | 2.705592000  | 0.386758000  |
| 6 | -5.039185000 | -0.721134000 | -0.572975000 |
| 6 | -5.828047000 | -1.091256000 | -1.669322000 |
| 6 | -5.471618000 | -1.042281000 | 0.720164000  |
| 6 | -7.026848000 | -1.765293000 | -1.477619000 |
| 1 | -5.490266000 | -0.835618000 | -2.673463000 |
| 6 | -6.670287000 | -1.717106000 | 0.907820000  |

|    |              |              |              |
|----|--------------|--------------|--------------|
| 1  | -4.829419000 | -0.800984000 | 1.564930000  |
| 6  | -7.450028000 | -2.077567000 | -0.187949000 |
| 1  | -7.634645000 | -2.045079000 | -2.334882000 |
| 1  | -6.989665000 | -1.977927000 | 1.913857000  |
| 79 | 1.197054000  | 0.142040000  | -1.301989000 |
| 15 | 3.386332000  | 0.234171000  | -0.395745000 |
| 6  | 4.008277000  | 1.941254000  | -0.208067000 |
| 6  | 4.549197000  | -0.547126000 | -1.571164000 |
| 6  | 3.715923000  | -0.617289000 | 1.173337000  |
| 6  | 5.165850000  | 2.380155000  | -0.854519000 |
| 6  | 3.278619000  | 2.831628000  | 0.591231000  |
| 6  | 5.734738000  | -1.147104000 | -1.137180000 |
| 6  | 4.268432000  | -0.493215000 | -2.939439000 |
| 6  | 4.512737000  | -0.055135000 | 2.171601000  |
| 6  | 3.200797000  | -1.906610000 | 1.330284000  |
| 6  | 5.589991000  | 3.697895000  | -0.707143000 |
| 1  | 5.740223000  | 1.695647000  | -1.476344000 |
| 6  | 3.715701000  | 4.142112000  | 0.740011000  |
| 1  | 2.386868000  | 2.485815000  | 1.113351000  |
| 6  | 6.625010000  | -1.683335000 | -2.061330000 |
| 1  | 5.958727000  | -1.194635000 | -0.072258000 |
| 6  | 5.162978000  | -1.024875000 | -3.861494000 |
| 1  | 3.339564000  | -0.031381000 | -3.277194000 |
| 6  | 4.792606000  | -0.784493000 | 3.322194000  |
| 1  | 4.908958000  | 0.951673000  | 2.051183000  |
| 6  | 3.493391000  | -2.632160000 | 2.477408000  |
| 1  | 2.561840000  | -2.336068000 | 0.557207000  |
| 6  | 4.866587000  | 4.578784000  | 0.088460000  |
| 1  | 6.490783000  | 4.033210000  | -1.216083000 |
| 1  | 3.149863000  | 4.826619000  | 1.367576000  |
| 6  | 6.340837000  | -1.621967000 | -3.422410000 |
| 1  | 7.543560000  | -2.152021000 | -1.715976000 |
| 1  | 4.935934000  | -0.979935000 | -4.924022000 |
| 6  | 4.285328000  | -2.070046000 | 3.473316000  |
| 1  | 5.404290000  | -0.342629000 | 4.105218000  |
| 1  | 3.080722000  | -3.628692000 | 2.604739000  |
| 1  | 5.199994000  | 5.607834000  | 0.202532000  |
| 1  | 7.037836000  | -2.044296000 | -4.142653000 |
| 1  | 4.498174000  | -2.634174000 | 4.378145000  |
| 8  | -2.464030000 | -2.026571000 | 0.871416000  |
| 16 | -1.358983000 | -2.100906000 | 1.820974000  |
| 9  | 0.624528000  | -3.783784000 | 2.066570000  |
| 9  | -1.179665000 | -4.621578000 | 1.229635000  |
| 9  | 0.083199000  | -3.356444000 | 0.021345000  |

|                                              |              |              |                             |
|----------------------------------------------|--------------|--------------|-----------------------------|
| 6                                            | -0.391241000 | -3.558107000 | 1.245203000                 |
| 8                                            | 1.097146000  | -0.823305000 | 3.694103000                 |
| 8                                            | 1.071374000  | 1.051809000  | 2.018207000                 |
| 16                                           | 0.385241000  | -0.052146000 | 2.690064000                 |
| 9                                            | -2.182500000 | 0.605617000  | 3.019476000                 |
| 9                                            | -1.096146000 | 0.314910000  | 4.854774000                 |
| 9                                            | -0.785638000 | 2.097930000  | 3.686077000                 |
| 6                                            | -1.015565000 | 0.789995000  | 3.629823000                 |
| 7                                            | -0.341292000 | -0.887949000 | 1.521788000                 |
| 8                                            | -1.640447000 | -2.343470000 | 3.229286000                 |
| 1                                            | -8.387600000 | -2.607818000 | -0.037317000                |
| 8                                            | -1.601296000 | 4.494511000  | 1.627662000                 |
| 6                                            | -2.284592000 | 5.219445000  | 2.624880000                 |
| 1                                            | -1.575481000 | 5.954383000  | 3.010462000                 |
| 1                                            | -3.158017000 | 5.750936000  | 2.221692000                 |
| 1                                            | -2.604283000 | 4.564810000  | 3.447133000                 |
| 6                                            | -2.100274000 | 2.018248000  | -2.729242000                |
| 6                                            | -3.381320000 | 2.792369000  | -2.480854000                |
| 1                                            | -2.087834000 | 1.731276000  | -3.794606000                |
| 1                                            | -1.230701000 | 2.682086000  | -2.597372000                |
| 6                                            | -3.556160000 | 3.901577000  | -3.510851000                |
| 1                                            | -4.252096000 | 2.118937000  | -2.523660000                |
| 1                                            | -3.381614000 | 3.237644000  | -1.477416000                |
| 6                                            | -4.810354000 | 4.723349000  | -3.267727000                |
| 1                                            | -2.670501000 | 4.554927000  | -3.495779000                |
| 1                                            | -3.586850000 | 3.460770000  | -4.518855000                |
| 1                                            | -4.937563000 | 5.509212000  | -4.019761000                |
| 1                                            | -5.706350000 | 4.090328000  | -3.292857000                |
| 1                                            | -4.779453000 | 5.206187000  | -2.282884000                |
| Zero-point correction=                       |              |              | 0.787255 (Hartree/Particle) |
| Thermal correction to Energy=                |              |              | 0.845126                    |
| Thermal correction to Enthalpy=              |              |              | 0.846070                    |
| Thermal correction to Gibbs Free Energy=     |              |              | 0.693563                    |
| Sum of electronic and zero-point Energies=   |              |              | -4116.019140                |
| Sum of electronic and thermal Energies=      |              |              | -4115.961269                |
| Sum of electronic and thermal Enthalpies=    |              |              | -4115.960325                |
| Sum of electronic and thermal Free Energies= |              |              | -4116.112832                |

### TSa3-2

|   |              |              |              |
|---|--------------|--------------|--------------|
| 6 | -0.576423000 | -0.110668000 | -4.507354000 |
| 6 | 0.219766000  | 0.699949000  | -3.712440000 |
| 6 | -0.334483000 | 1.275815000  | -2.568174000 |
| 6 | -1.681003000 | 1.009079000  | -2.228878000 |
| 6 | -2.467947000 | 0.164714000  | -3.021801000 |



|    |              |              |              |
|----|--------------|--------------|--------------|
| 6  | -1.909768000 | -0.379469000 | -4.164037000 |
| 1  | -0.159611000 | -0.552340000 | -5.410339000 |
| 1  | 1.262780000  | 0.886942000  | -3.966724000 |
| 1  | -3.491443000 | -0.063965000 | -2.736236000 |
| 1  | -2.507078000 | -1.029436000 | -4.798380000 |
| 6  | 0.299589000  | 2.154453000  | -1.558158000 |
| 6  | -0.772954000 | 2.456770000  | -0.594712000 |
| 6  | -1.928580000 | 1.618807000  | -0.944590000 |
| 1  | 0.768048000  | 3.057127000  | -1.971617000 |
| 6  | -2.828404000 | 1.313894000  | 0.076371000  |
| 6  | -2.215701000 | 1.558290000  | 1.335424000  |
| 6  | -2.876662000 | 1.867096000  | 2.543771000  |
| 6  | -0.779208000 | 1.611067000  | 1.265553000  |
| 6  | -2.144569000 | 2.348626000  | 3.602056000  |
| 1  | -3.960461000 | 1.788749000  | 2.595097000  |
| 6  | -0.064441000 | 2.165927000  | 2.366185000  |
| 1  | -0.296136000 | 0.765638000  | 0.772420000  |
| 6  | -0.739766000 | 2.531019000  | 3.502063000  |
| 1  | -2.650220000 | 2.633130000  | 4.521993000  |
| 1  | 1.022905000  | 2.208955000  | 2.318394000  |
| 1  | -0.194758000 | 2.913989000  | 4.361883000  |
| 6  | -4.172560000 | 0.764595000  | -0.069501000 |
| 6  | -5.052652000 | 1.268847000  | -1.026432000 |
| 6  | -4.570149000 | -0.281951000 | 0.772969000  |
| 6  | -6.324357000 | 0.716102000  | -1.153061000 |
| 1  | -4.765513000 | 2.087487000  | -1.683991000 |
| 6  | -5.828206000 | -0.855987000 | 0.629392000  |
| 1  | -3.846539000 | -0.698871000 | 1.469126000  |
| 6  | -6.723837000 | -0.338785000 | -0.326400000 |
| 79 | 2.042373000  | 1.193610000  | -0.756228000 |
| 15 | 4.066400000  | 0.107277000  | -0.182198000 |
| 6  | 4.900122000  | 0.628121000  | 1.357073000  |
| 6  | 5.311157000  | 0.404119000  | -1.485880000 |
| 6  | 3.895443000  | -1.696818000 | -0.094926000 |
| 6  | 6.240179000  | 1.023155000  | 1.368830000  |
| 6  | 4.167013000  | 0.618969000  | 2.550359000  |
| 6  | 6.208240000  | -0.585080000 | -1.895574000 |
| 6  | 5.392997000  | 1.682687000  | -2.046566000 |
| 6  | 4.679151000  | -2.468042000 | 0.765496000  |
| 6  | 2.989810000  | -2.316880000 | -0.961413000 |
| 6  | 6.841194000  | 1.412299000  | 2.562440000  |
| 1  | 6.818629000  | 1.026198000  | 0.446894000  |
| 6  | 4.777863000  | 1.002754000  | 3.737933000  |
| 1  | 3.129430000  | 0.287799000  | 2.543454000  |

|    |              |              |              |
|----|--------------|--------------|--------------|
| 6  | 7.175098000  | -0.295619000 | -2.853501000 |
| 1  | 6.147333000  | -1.583628000 | -1.465311000 |
| 6  | 6.365493000  | 1.970923000  | -2.996271000 |
| 1  | 4.687392000  | 2.452473000  | -1.731983000 |
| 6  | 4.561013000  | -3.853336000 | 0.751868000  |
| 1  | 5.378540000  | -1.985773000 | 1.447177000  |
| 6  | 2.891970000  | -3.701864000 | -0.982925000 |
| 1  | 2.341235000  | -1.713696000 | -1.600399000 |
| 6  | 6.111704000  | 1.403583000  | 3.745583000  |
| 1  | 7.884211000  | 1.720127000  | 2.564900000  |
| 1  | 4.207678000  | 0.986653000  | 4.663894000  |
| 6  | 7.255958000  | 0.980318000  | -3.402086000 |
| 1  | 7.867342000  | -1.071303000 | -3.172339000 |
| 1  | 6.424432000  | 2.967980000  | -3.426312000 |
| 6  | 3.672729000  | -4.468248000 | -0.123432000 |
| 1  | 5.162354000  | -4.453380000 | 1.430679000  |
| 1  | 2.180729000  | -4.180878000 | -1.648659000 |
| 1  | 6.583327000  | 1.707322000  | 4.677517000  |
| 1  | 8.012075000  | 1.202597000  | -4.151436000 |
| 1  | 3.577128000  | -5.551225000 | -0.127176000 |
| 8  | -2.595391000 | -1.787577000 | -0.898745000 |
| 16 | -1.652147000 | -2.498685000 | -0.051523000 |
| 9  | -0.038493000 | -4.509121000 | -0.576446000 |
| 9  | -1.776360000 | -4.367560000 | -1.842439000 |
| 9  | -0.129450000 | -2.998620000 | -2.119250000 |
| 6  | -0.835730000 | -3.673631000 | -1.218113000 |
| 8  | 1.013062000  | -3.161588000 | 1.704112000  |
| 8  | 1.401362000  | -0.672183000 | 1.731809000  |
| 16 | 0.482021000  | -1.810273000 | 1.634990000  |
| 9  | -1.624126000 | -0.844051000 | 2.951642000  |
| 9  | -0.995833000 | -2.802596000 | 3.602343000  |
| 9  | 0.166239000  | -1.070815000 | 4.127060000  |
| 6  | -0.573320000 | -1.632091000 | 3.178457000  |
| 7  | -0.480613000 | -1.474481000 | 0.383656000  |
| 8  | -2.160045000 | -3.325805000 | 1.041517000  |
| 8  | -7.969202000 | -0.877093000 | -0.455164000 |
| 6  | -8.006956000 | -1.988698000 | -1.335713000 |
| 1  | -9.042461000 | -2.336435000 | -1.365302000 |
| 1  | -7.692381000 | -1.697918000 | -2.347649000 |
| 1  | -7.363769000 | -2.800455000 | -0.972381000 |
| 8  | -7.153693000 | 1.188446000  | -2.127877000 |
| 8  | -6.269566000 | -1.912786000 | 1.339380000  |
| 6  | -5.335231000 | -2.553460000 | 2.189243000  |
| 1  | -5.851244000 | -3.417447000 | 2.611711000  |

|                                              |              |              |                             |
|----------------------------------------------|--------------|--------------|-----------------------------|
| 1                                            | -4.445358000 | -2.886161000 | 1.637488000                 |
| 1                                            | -5.019861000 | -1.890717000 | 3.007956000                 |
| 6                                            | -8.300715000 | 1.870558000  | -1.650583000                |
| 1                                            | -8.934613000 | 1.215487000  | -1.041274000                |
| 1                                            | -8.010934000 | 2.750532000  | -1.057550000                |
| 1                                            | -8.858209000 | 2.202616000  | -2.530014000                |
| 6                                            | -0.888267000 | 3.938228000  | -0.267853000                |
| 6                                            | -2.040540000 | 4.491108000  | 0.550201000                 |
| 1                                            | -0.926437000 | 4.424651000  | -1.257825000                |
| 1                                            | 0.072378000  | 4.254446000  | 0.170012000                 |
| 6                                            | -2.061933000 | 6.014386000  | 0.502983000                 |
| 1                                            | -2.999425000 | 4.103854000  | 0.170461000                 |
| 1                                            | -1.970751000 | 4.175124000  | 1.598008000                 |
| 6                                            | -3.192875000 | 6.599202000  | 1.331489000                 |
| 1                                            | -1.095660000 | 6.402661000  | 0.860060000                 |
| 1                                            | -2.151984000 | 6.347268000  | -0.542128000                |
| 1                                            | -3.206165000 | 7.693403000  | 1.292167000                 |
| 1                                            | -4.166649000 | 6.241141000  | 0.974504000                 |
| 1                                            | -3.102959000 | 6.304177000  | 2.384507000                 |
| Zero-point correction=                       |              |              | 0.853488 (Hartree/Particle) |
| Thermal correction to Energy=                |              |              | 0.916422                    |
| Thermal correction to Enthalpy=              |              |              | 0.917366                    |
| Thermal correction to Gibbs Free Energy=     |              |              | 0.754257                    |
| Sum of electronic and zero-point Energies=   |              |              | -4344.870585                |
| Sum of electronic and thermal Energies=      |              |              | -4344.807651                |
| Sum of electronic and thermal Enthalpies=    |              |              | -4344.806707                |
| Sum of electronic and thermal Free Energies= |              |              | -4344.969816                |

### TSa3'-2

|   |              |              |              |
|---|--------------|--------------|--------------|
| 6 | -0.001828000 | -4.922980000 | -1.305706000 |
| 6 | 0.344389000  | -3.694839000 | -1.848400000 |
| 6 | -0.577084000 | -2.647177000 | -1.792871000 |
| 6 | -1.844972000 | -2.858058000 | -1.210209000 |
| 6 | -2.166200000 | -4.084711000 | -0.616945000 |
| 6 | -1.242047000 | -5.113539000 | -0.679106000 |
| 1 | 0.705936000  | -5.748243000 | -1.350014000 |
| 1 | 1.328714000  | -3.535394000 | -2.289313000 |
| 1 | -3.125975000 | -4.228630000 | -0.125009000 |
| 1 | -1.477503000 | -6.078677000 | -0.237206000 |
| 6 | -0.431018000 | -1.238805000 | -2.230843000 |
| 6 | -1.753007000 | -0.634551000 | -2.018317000 |
| 6 | -2.545474000 | -1.593580000 | -1.238488000 |
| 1 | -0.050675000 | -1.099788000 | -3.250598000 |
| 6 | -3.580357000 | -1.119057000 | -0.453003000 |

|    |              |              |              |
|----|--------------|--------------|--------------|
| 6  | -3.467467000 | 0.286127000  | -0.253333000 |
| 6  | -4.535610000 | 1.142007000  | 0.050395000  |
| 6  | -2.162386000 | 0.806257000  | -0.535687000 |
| 6  | -4.340334000 | 2.508090000  | -0.044473000 |
| 1  | -5.516099000 | 0.716522000  | 0.241809000  |
| 6  | -2.003551000 | 2.219932000  | -0.677705000 |
| 1  | -1.309077000 | 0.339308000  | -0.040832000 |
| 6  | -3.080318000 | 3.061852000  | -0.437904000 |
| 6  | -4.649712000 | -1.938104000 | 0.123851000  |
| 6  | -5.368237000 | -2.822472000 | -0.690419000 |
| 6  | -4.977510000 | -1.839704000 | 1.481643000  |
| 6  | -6.396842000 | -3.590915000 | -0.160854000 |
| 1  | -5.108754000 | -2.895175000 | -1.746424000 |
| 6  | -6.002986000 | -2.614145000 | 2.008918000  |
| 1  | -4.384410000 | -1.188675000 | 2.120052000  |
| 6  | -6.716256000 | -3.486359000 | 1.190624000  |
| 1  | -6.952172000 | -4.270783000 | -0.802757000 |
| 1  | -6.238857000 | -2.546221000 | 3.068289000  |
| 79 | 1.268407000  | -0.460866000 | -1.146287000 |
| 15 | 3.480303000  | 0.163374000  | -0.543569000 |
| 6  | 3.903162000  | 1.788559000  | -1.257988000 |
| 6  | 4.667407000  | -0.974516000 | -1.357773000 |
| 6  | 4.029821000  | 0.180290000  | 1.189831000  |
| 6  | 5.228172000  | 2.220581000  | -1.373661000 |
| 6  | 2.871305000  | 2.602691000  | -1.727081000 |
| 6  | 5.929522000  | -1.247257000 | -0.821858000 |
| 6  | 4.304772000  | -1.551314000 | -2.578739000 |
| 6  | 4.566604000  | 1.313315000  | 1.802058000  |
| 6  | 3.902396000  | -1.007544000 | 1.916139000  |
| 6  | 5.511984000  | 3.459998000  | -1.934113000 |
| 1  | 6.040986000  | 1.582157000  | -1.029271000 |
| 6  | 3.158006000  | 3.841987000  | -2.291642000 |
| 1  | 1.842183000  | 2.250376000  | -1.648299000 |
| 6  | 6.813088000  | -2.079882000 | -1.501235000 |
| 1  | 6.216707000  | -0.817286000 | 0.136794000  |
| 6  | 5.190257000  | -2.380963000 | -3.256818000 |
| 1  | 3.315709000  | -1.348841000 | -2.992768000 |
| 6  | 4.992290000  | 1.248890000  | 3.123825000  |
| 1  | 4.635311000  | 2.249889000  | 1.252629000  |
| 6  | 4.338698000  | -1.067536000 | 3.233022000  |
| 1  | 3.444620000  | -1.883876000 | 1.454980000  |
| 6  | 4.476470000  | 4.271983000  | -2.391398000 |
| 1  | 6.544116000  | 3.791652000  | -2.019367000 |
| 1  | 2.346965000  | 4.469928000  | -2.655109000 |

|    |              |              |              |
|----|--------------|--------------|--------------|
| 6  | 6.445390000  | -2.646580000 | -2.717443000 |
| 1  | 7.791359000  | -2.289657000 | -1.074747000 |
| 1  | 4.896463000  | -2.826640000 | -4.204352000 |
| 6  | 4.886729000  | 0.059737000  | 3.836067000  |
| 1  | 5.399948000  | 2.136930000  | 3.600892000  |
| 1  | 4.230438000  | -1.991417000 | 3.795448000  |
| 1  | 4.700973000  | 5.240163000  | -2.833287000 |
| 1  | 7.136296000  | -3.301418000 | -3.243442000 |
| 1  | 5.215286000  | 0.015553000  | 4.871612000  |
| 8  | -1.837875000 | -1.660130000 | 1.764861000  |
| 16 | -0.720411000 | -1.149258000 | 2.550661000  |
| 9  | 0.877491000  | -2.797436000 | 1.277255000  |
| 9  | 1.558077000  | -2.241201000 | 3.248719000  |
| 9  | -0.087609000 | -3.619748000 | 3.024363000  |
| 6  | 0.491305000  | -2.539221000 | 2.523326000  |
| 8  | 1.606660000  | 0.923417000  | 3.535564000  |
| 8  | 1.384747000  | 2.006708000  | 1.274318000  |
| 16 | 0.801441000  | 1.228476000  | 2.365809000  |
| 9  | -1.654707000 | 2.229083000  | 2.252080000  |
| 9  | -0.876681000 | 2.036335000  | 4.253347000  |
| 9  | -0.152762000 | 3.600016000  | 2.962232000  |
| 6  | -0.561891000 | 2.332384000  | 3.012558000  |
| 7  | 0.026819000  | -0.011020000 | 1.681382000  |
| 8  | -0.926040000 | -0.829985000 | 3.955273000  |
| 1  | -7.518666000 | -4.090427000 | 1.608025000  |
| 8  | -2.946637000 | 4.410025000  | -0.554776000 |
| 6  | -3.034199000 | 5.160566000  | 0.650858000  |
| 1  | -2.536893000 | 6.116182000  | 0.460799000  |
| 1  | -4.076216000 | 5.340038000  | 0.933647000  |
| 1  | -2.517407000 | 4.645808000  | 1.473198000  |
| 8  | -0.755127000 | 2.611680000  | -0.972750000 |
| 8  | -5.307551000 | 3.423754000  | 0.145034000  |
| 6  | -6.592053000 | 2.961130000  | 0.503894000  |
| 1  | -7.210450000 | 3.848956000  | 0.644245000  |
| 1  | -7.025380000 | 2.339014000  | -0.290795000 |
| 1  | -6.563919000 | 2.383636000  | 1.437205000  |
| 6  | -0.246524000 | 3.853794000  | -0.489667000 |
| 1  | 0.839991000  | 3.749854000  | -0.492173000 |
| 1  | -0.567712000 | 4.688350000  | -1.119842000 |
| 1  | -0.551817000 | 4.024243000  | 0.547933000  |
| 6  | -2.286029000 | 0.125976000  | -3.220556000 |
| 6  | -3.732204000 | 0.583215000  | -3.275241000 |
| 1  | -2.122688000 | -0.557834000 | -4.071567000 |
| 1  | -1.608617000 | 0.975683000  | -3.401075000 |

|                                              |              |              |                             |
|----------------------------------------------|--------------|--------------|-----------------------------|
| 6                                            | -4.103415000 | 1.099652000  | -4.659035000                |
| 1                                            | -4.401394000 | -0.249415000 | -3.003613000                |
| 1                                            | -3.923571000 | 1.378436000  | -2.544391000                |
| 6                                            | -5.541416000 | 1.586115000  | -4.718954000                |
| 1                                            | -3.419591000 | 1.916088000  | -4.936607000                |
| 1                                            | -3.943440000 | 0.306127000  | -5.404777000                |
| 1                                            | -5.806399000 | 1.964567000  | -5.711813000                |
| 1                                            | -6.240211000 | 0.776229000  | -4.473585000                |
| 1                                            | -5.711748000 | 2.395074000  | -3.996963000                |
| Zero-point correction=                       |              |              | 0.854707 (Hartree/Particle) |
| Thermal correction to Energy=                |              |              | 0.916805                    |
| Thermal correction to Enthalpy=              |              |              | 0.917749                    |
| Thermal correction to Gibbs Free Energy=     |              |              | 0.758216                    |
| Sum of electronic and zero-point Energies=   |              |              | -4344.878438                |
| Sum of electronic and thermal Energies=      |              |              | -4344.816340                |
| Sum of electronic and thermal Enthalpies=    |              |              | -4344.815396                |
| Sum of electronic and thermal Free Energies= |              |              | -4344.974930                |

#### B-re

|   |              |              |              |
|---|--------------|--------------|--------------|
| 6 | 4.556566000  | -2.183245000 | -0.040179000 |
| 6 | 4.979286000  | -0.861395000 | -0.158420000 |
| 6 | 4.042674000  | 0.158987000  | -0.248559000 |
| 6 | 2.669742000  | -0.100095000 | -0.205666000 |
| 6 | 2.246999000  | -1.446927000 | -0.113754000 |
| 6 | 3.202291000  | -2.471301000 | -0.024792000 |
| 1 | 5.284030000  | -2.987981000 | 0.030312000  |
| 1 | 6.040593000  | -0.625925000 | -0.179248000 |
| 1 | 4.371683000  | 1.193086000  | -0.338689000 |
| 1 | 2.854546000  | -3.499156000 | 0.045959000  |
| 6 | 1.722831000  | 1.020850000  | -0.326405000 |
| 6 | 0.742047000  | 1.361746000  | 0.529765000  |
| 6 | 0.865332000  | -1.779865000 | -0.150779000 |
| 6 | -0.320585000 | -2.037797000 | -0.176547000 |
| 6 | -1.726629000 | -2.251244000 | -0.190229000 |
| 6 | -2.269186000 | -3.530744000 | -0.007002000 |
| 6 | -2.591125000 | -1.160554000 | -0.377032000 |
| 6 | -3.644375000 | -3.712875000 | -0.008919000 |
| 1 | -1.596902000 | -4.372920000 | 0.137188000  |
| 6 | -3.964954000 | -1.352418000 | -0.377619000 |
| 1 | -2.162301000 | -0.170083000 | -0.525477000 |
| 6 | -4.495309000 | -2.626654000 | -0.193389000 |
| 1 | -4.056909000 | -4.708816000 | 0.133819000  |
| 1 | -4.627272000 | -0.502666000 | -0.524866000 |
| 1 | 1.859306000  | 1.634658000  | -1.218873000 |

|                                              |              |              |                             |
|----------------------------------------------|--------------|--------------|-----------------------------|
| 6                                            | -0.140474000 | 2.514057000  | 0.235217000                 |
| 6                                            | 0.302573000  | 3.619171000  | -0.503588000                |
| 6                                            | -1.461481000 | 2.529488000  | 0.702877000                 |
| 6                                            | -0.545107000 | 4.680434000  | -0.786584000                |
| 1                                            | 1.337856000  | 3.656641000  | -0.836156000                |
| 6                                            | -2.313400000 | 3.589089000  | 0.415413000                 |
| 1                                            | -1.833575000 | 1.691620000  | 1.289716000                 |
| 6                                            | -1.860727000 | 4.669569000  | -0.332481000                |
| 1                                            | -0.172278000 | 5.529121000  | -1.355583000                |
| 1                                            | -3.337309000 | 3.569824000  | 0.781920000                 |
| 1                                            | -2.523807000 | 5.502781000  | -0.551964000                |
| 6                                            | 0.485642000  | 0.630255000  | 1.813205000                 |
| 1                                            | -0.405451000 | -0.009190000 | 1.747020000                 |
| 1                                            | 1.323803000  | -0.019182000 | 2.080185000                 |
| 1                                            | 0.320869000  | 1.340147000  | 2.632596000                 |
| 1                                            | -5.572668000 | -2.773154000 | -0.195036000                |
| Zero-point correction=                       |              |              | 0.333756 (Hartree/Particle) |
| Thermal correction to Energy=                |              |              | 0.352752                    |
| Thermal correction to Enthalpy=              |              |              | 0.353696                    |
| Thermal correction to Gibbs Free Energy=     |              |              | 0.284549                    |
| Sum of electronic and zero-point Energies=   |              |              | -886.223041                 |
| Sum of electronic and thermal Energies=      |              |              | -886.204044                 |
| Sum of electronic and thermal Enthalpies=    |              |              | -886.203100                 |
| Sum of electronic and thermal Free Energies= |              |              | -886.272247                 |

### B-1

|   |              |              |              |
|---|--------------|--------------|--------------|
| 6 | 1.081263000  | 4.865051000  | -0.117880000 |
| 6 | 2.418156000  | 5.228913000  | 0.011435000  |
| 6 | 3.397203000  | 4.257152000  | 0.197372000  |
| 6 | 3.067397000  | 2.904246000  | 0.252534000  |
| 6 | 1.706149000  | 2.543735000  | 0.108528000  |
| 6 | 0.726405000  | 3.524715000  | -0.068147000 |
| 1 | 0.317226000  | 5.624870000  | -0.257581000 |
| 1 | 2.702172000  | 6.277410000  | -0.028674000 |
| 1 | 4.441176000  | 4.544574000  | 0.302275000  |
| 1 | -0.316762000 | 3.226868000  | -0.174430000 |
| 6 | 4.087142000  | 1.861516000  | 0.487197000  |
| 6 | 4.747651000  | 1.186426000  | -0.472831000 |
| 6 | 1.395971000  | 1.133012000  | 0.128969000  |
| 6 | 1.890828000  | -0.018187000 | 0.104460000  |
| 6 | 2.406276000  | -1.334786000 | 0.038882000  |
| 6 | 2.214646000  | -2.114417000 | -1.117168000 |
| 6 | 3.173897000  | -1.835250000 | 1.106045000  |
| 6 | 2.770700000  | -3.381312000 | -1.191069000 |

|    |              |              |              |
|----|--------------|--------------|--------------|
| 1  | 1.624467000  | -1.710066000 | -1.937987000 |
| 6  | 3.743742000  | -3.094660000 | 1.009248000  |
| 1  | 3.330798000  | -1.215524000 | 1.985712000  |
| 6  | 3.537507000  | -3.867254000 | -0.131876000 |
| 1  | 2.618381000  | -3.989687000 | -2.078422000 |
| 1  | 4.354222000  | -3.475053000 | 1.823458000  |
| 1  | 4.246566000  | 1.585303000  | 1.532392000  |
| 6  | 5.681232000  | 0.095662000  | -0.119589000 |
| 6  | 6.352310000  | 0.073772000  | 1.111696000  |
| 6  | 5.894509000  | -0.969444000 | -1.003817000 |
| 6  | 7.181034000  | -0.984779000 | 1.456034000  |
| 1  | 6.248111000  | 0.914461000  | 1.794813000  |
| 6  | 6.723538000  | -2.030974000 | -0.659373000 |
| 1  | 5.386980000  | -0.983977000 | -1.966247000 |
| 6  | 7.368398000  | -2.045367000 | 0.572510000  |
| 1  | 7.701312000  | -0.972600000 | 2.410881000  |
| 1  | 6.867522000  | -2.849390000 | -1.361341000 |
| 1  | 8.026065000  | -2.869423000 | 0.838090000  |
| 79 | -0.604883000 | 0.279423000  | 0.123682000  |
| 15 | -2.883377000 | -0.285438000 | 0.030827000  |
| 6  | -3.581824000 | -0.729326000 | 1.643727000  |
| 6  | -3.191283000 | -1.682007000 | -1.084221000 |
| 6  | -3.841351000 | 1.124941000  | -0.589973000 |
| 6  | -4.515385000 | -1.760423000 | 1.774706000  |
| 6  | -3.212324000 | 0.028271000  | 2.759954000  |
| 6  | -4.313120000 | -1.718108000 | -1.915740000 |
| 6  | -2.305951000 | -2.764505000 | -1.053718000 |
| 6  | -5.107830000 | 1.426705000  | -0.083122000 |
| 6  | -3.299450000 | 1.896918000  | -1.623760000 |
| 6  | -5.074918000 | -2.028117000 | 3.019922000  |
| 1  | -4.803643000 | -2.353199000 | 0.908033000  |
| 6  | -3.779432000 | -0.240839000 | 3.998547000  |
| 1  | -2.481968000 | 0.831391000  | 2.654557000  |
| 6  | -4.544870000 | -2.835592000 | -2.711540000 |
| 1  | -5.002832000 | -0.875863000 | -1.942441000 |
| 6  | -2.546945000 | -3.879354000 | -1.845966000 |
| 1  | -1.430418000 | -2.733560000 | -0.403352000 |
| 6  | -5.823457000 | 2.497176000  | -0.609880000 |
| 1  | -5.532233000 | 0.830531000  | 0.723129000  |
| 6  | -4.021485000 | 2.961207000  | -2.148189000 |
| 1  | -2.311311000 | 1.657788000  | -2.020324000 |
| 6  | -4.709156000 | -1.270200000 | 4.127657000  |
| 1  | -5.799349000 | -2.831595000 | 3.124087000  |
| 1  | -3.492925000 | 0.348587000  | 4.865545000  |



|                                              |              |              |                             |
|----------------------------------------------|--------------|--------------|-----------------------------|
| 6                                            | -3.665015000 | -3.912815000 | -2.676015000                |
| 1                                            | -5.415813000 | -2.863362000 | -3.361064000                |
| 1                                            | -1.861076000 | -4.722104000 | -1.819678000                |
| 6                                            | -5.281965000 | 3.262748000  | -1.637760000                |
| 1                                            | -6.807041000 | 2.734688000  | -0.213121000                |
| 1                                            | -3.599680000 | 3.558850000  | -2.951988000                |
| 1                                            | -5.148414000 | -1.483345000 | 5.098846000                 |
| 1                                            | -3.850550000 | -4.783266000 | -3.300014000                |
| 1                                            | -5.843849000 | 4.100422000  | -2.042810000                |
| 6                                            | 4.508614000  | 1.456678000  | -1.928649000                |
| 1                                            | 3.932388000  | 0.642919000  | -2.391808000                |
| 1                                            | 3.947747000  | 2.383045000  | -2.080074000                |
| 1                                            | 5.453726000  | 1.527592000  | -2.478869000                |
| 1                                            | 3.982582000  | -4.856882000 | -0.199711000                |
| Zero-point correction=                       |              |              | 0.609712 (Hartree/Particle) |
| Thermal correction to Energy=                |              |              | 0.648392                    |
| Thermal correction to Enthalpy=              |              |              | 0.649336                    |
| Thermal correction to Gibbs Free Energy=     |              |              | 0.533208                    |
| Sum of electronic and zero-point Energies=   |              |              | -2056.956681                |
| Sum of electronic and thermal Energies=      |              |              | -2056.918002                |
| Sum of electronic and thermal Enthalpies=    |              |              | -2056.917058                |
| Sum of electronic and thermal Free Energies= |              |              | -2057.033185                |

### B-TS1

|   |              |              |              |
|---|--------------|--------------|--------------|
| 6 | 1.426833000  | 5.025494000  | -0.040172000 |
| 6 | 2.798793000  | 5.213470000  | 0.111615000  |
| 6 | 3.649406000  | 4.122131000  | 0.280470000  |
| 6 | 3.120885000  | 2.836279000  | 0.298945000  |
| 6 | 1.734388000  | 2.648450000  | 0.137830000  |
| 6 | 0.889194000  | 3.743915000  | -0.026002000 |
| 1 | 0.774261000  | 5.884935000  | -0.168606000 |
| 1 | 3.211576000  | 6.218926000  | 0.100838000  |
| 1 | 4.720234000  | 4.273125000  | 0.400860000  |
| 1 | -0.181723000 | 3.585035000  | -0.146158000 |
| 6 | 3.912739000  | 1.604953000  | 0.489636000  |
| 6 | 4.644397000  | 0.996059000  | -0.505823000 |
| 6 | 1.331634000  | 1.253572000  | 0.155111000  |
| 6 | 2.204676000  | 0.291429000  | 0.224937000  |
| 6 | 2.517910000  | -1.100041000 | 0.128751000  |
| 6 | 2.135108000  | -1.804539000 | -1.028327000 |
| 6 | 3.200939000  | -1.775614000 | 1.152532000  |
| 6 | 2.411915000  | -3.159405000 | -1.141011000 |
| 1 | 1.602665000  | -1.273742000 | -1.816378000 |
| 6 | 3.497390000  | -3.123852000 | 1.019374000  |

|    |              |              |              |
|----|--------------|--------------|--------------|
| 1  | 3.489514000  | -1.230972000 | 2.048716000  |
| 6  | 3.099685000  | -3.816646000 | -0.122473000 |
| 1  | 2.100117000  | -3.703362000 | -2.029284000 |
| 1  | 4.033712000  | -3.639389000 | 1.811841000  |
| 1  | 4.088471000  | 1.295361000  | 1.523748000  |
| 6  | 5.546510000  | -0.110292000 | -0.188598000 |
| 6  | 6.193923000  | -0.180421000 | 1.057072000  |
| 6  | 5.774050000  | -1.138461000 | -1.117346000 |
| 6  | 7.019894000  | -1.249076000 | 1.369887000  |
| 1  | 6.078286000  | 0.631968000  | 1.771360000  |
| 6  | 6.586970000  | -2.215734000 | -0.796292000 |
| 1  | 5.281800000  | -1.114496000 | -2.086766000 |
| 6  | 7.211665000  | -2.274461000 | 0.446801000  |
| 1  | 7.527134000  | -1.277456000 | 2.330688000  |
| 1  | 6.738699000  | -3.011109000 | -1.521375000 |
| 1  | 7.858612000  | -3.113069000 | 0.691770000  |
| 79 | -0.642094000 | 0.540984000  | 0.140401000  |
| 15 | -2.863464000 | -0.251535000 | 0.029843000  |
| 6  | -3.504709000 | -0.822715000 | 1.629630000  |
| 6  | -2.972067000 | -1.670668000 | -1.102119000 |
| 6  | -4.031495000 | 0.997306000  | -0.580946000 |
| 6  | -4.352912000 | -1.928772000 | 1.728996000  |
| 6  | -3.166076000 | -0.096500000 | 2.775625000  |
| 6  | -4.013645000 | -1.811003000 | -2.021003000 |
| 6  | -1.977932000 | -2.652430000 | -1.018886000 |
| 6  | -5.365070000 | 1.013384000  | -0.162566000 |
| 6  | -3.585287000 | 1.928898000  | -1.523929000 |
| 6  | -4.858629000 | -2.301215000 | 2.970017000  |
| 1  | -4.615710000 | -2.498328000 | 0.838551000  |
| 6  | -3.677285000 | -0.471397000 | 4.011790000  |
| 1  | -2.499190000 | 0.762439000  | 2.695480000  |
| 6  | -4.058845000 | -2.928708000 | -2.849351000 |
| 1  | -4.785882000 | -1.046855000 | -2.094203000 |
| 6  | -2.032795000 | -3.768832000 | -1.842634000 |
| 1  | -1.161436000 | -2.539077000 | -0.303535000 |
| 6  | -6.243987000 | 1.952887000  | -0.690191000 |
| 1  | -5.714387000 | 0.294679000  | 0.577685000  |
| 6  | -4.469012000 | 2.863061000  | -2.050153000 |
| 1  | -2.542623000 | 1.918828000  | -1.844196000 |
| 6  | -4.521636000 | -1.574239000 | 4.107982000  |
| 1  | -5.516457000 | -3.162979000 | 3.047962000  |
| 1  | -3.412496000 | 0.093734000  | 4.901685000  |
| 6  | -3.072448000 | -3.905252000 | -2.760102000 |
| 1  | -4.867782000 | -3.035306000 | -3.567492000 |

|                                              |              |              |                             |
|----------------------------------------------|--------------|--------------|-----------------------------|
| 1                                            | -1.261394000 | -4.531976000 | -1.771431000                |
| 6                                            | -5.796929000 | 2.874932000  | -1.632203000                |
| 1                                            | -7.280208000 | 1.966838000  | -0.362473000                |
| 1                                            | -4.120161000 | 3.586476000  | -2.782608000                |
| 1                                            | -4.916257000 | -1.871526000 | 5.076319000                 |
| 1                                            | -3.111490000 | -4.776107000 | -3.409616000                |
| 1                                            | -6.486595000 | 3.609843000  | -2.039730000                |
| 1                                            | 3.326275000  | -4.875642000 | -0.218445000                |
| 6                                            | 4.467283000  | 1.382722000  | -1.936719000                |
| 1                                            | 5.438063000  | 1.518722000  | -2.426089000                |
| 1                                            | 3.947952000  | 0.585256000  | -2.486815000                |
| 1                                            | 3.881213000  | 2.298460000  | -2.042573000                |
| Zero-point correction=                       |              |              | 0.609002 (Hartree/Particle) |
| Thermal correction to Energy=                |              |              | 0.646848                    |
| Thermal correction to Enthalpy=              |              |              | 0.647792                    |
| Thermal correction to Gibbs Free Energy=     |              |              | 0.533372                    |
| Sum of electronic and zero-point Energies=   |              |              | -2056.950514                |
| Sum of electronic and thermal Energies=      |              |              | -2056.912668                |
| Sum of electronic and thermal Enthalpies=    |              |              | -2056.911724                |
| Sum of electronic and thermal Free Energies= |              |              | -2057.026145                |

## B-2

|   |              |              |              |
|---|--------------|--------------|--------------|
| 6 | -2.228958000 | 5.114311000  | -0.354612000 |
| 6 | -1.475796000 | 3.955780000  | -0.287414000 |
| 6 | -2.136553000 | 2.721176000  | -0.391721000 |
| 6 | -3.545207000 | 2.660866000  | -0.557976000 |
| 6 | -4.296318000 | 3.821955000  | -0.585108000 |
| 6 | -3.621172000 | 5.042151000  | -0.501811000 |
| 1 | -1.748601000 | 6.086481000  | -0.290763000 |
| 1 | -0.394625000 | 3.983758000  | -0.163856000 |
| 1 | -5.378154000 | 3.795791000  | -0.687139000 |
| 1 | -4.192793000 | 5.965925000  | -0.554100000 |
| 6 | -1.595739000 | 1.409799000  | -0.281021000 |
| 6 | -2.678025000 | 0.458843000  | -0.430927000 |
| 6 | -3.962660000 | 1.241550000  | -0.575140000 |
| 1 | -4.746619000 | 0.922646000  | -1.257813000 |
| 6 | -3.824080000 | 0.517761000  | 0.742591000  |
| 6 | -2.357230000 | -0.874938000 | -1.014720000 |
| 6 | -2.577490000 | -1.126140000 | -2.367060000 |
| 6 | -1.757724000 | -1.859473000 | -0.222538000 |
| 6 | -2.219369000 | -2.354047000 | -2.920241000 |
| 1 | -3.036984000 | -0.358245000 | -2.988583000 |
| 6 | -1.384484000 | -3.076458000 | -0.776483000 |
| 1 | -1.598682000 | -1.663054000 | 0.839068000  |

|    |              |              |              |
|----|--------------|--------------|--------------|
| 6  | -1.623329000 | -3.327988000 | -2.126685000 |
| 1  | -2.406735000 | -2.546580000 | -3.973855000 |
| 1  | -0.914384000 | -3.835071000 | -0.155213000 |
| 6  | -4.525643000 | -0.785091000 | 0.911343000  |
| 6  | -4.423919000 | -1.479958000 | 2.126364000  |
| 6  | -5.246220000 | -1.393434000 | -0.127862000 |
| 6  | -5.000714000 | -2.732274000 | 2.289042000  |
| 1  | -3.880124000 | -1.048398000 | 2.961774000  |
| 6  | -5.824200000 | -2.643365000 | 0.034169000  |
| 1  | -5.359518000 | -0.900741000 | -1.089705000 |
| 6  | -5.699659000 | -3.322444000 | 1.242361000  |
| 1  | -4.903397000 | -3.247336000 | 3.241271000  |
| 1  | -6.377364000 | -3.088729000 | -0.788463000 |
| 1  | -6.151103000 | -4.303123000 | 1.368378000  |
| 79 | 0.344561000  | 0.781416000  | -0.065365000 |
| 15 | 2.540848000  | -0.132995000 | 0.094079000  |
| 6  | 3.849470000  | 0.991413000  | -0.473906000 |
| 6  | 2.686657000  | -1.672859000 | -0.858261000 |
| 6  | 2.973611000  | -0.574202000 | 1.806679000  |
| 6  | 4.927696000  | 0.557509000  | -1.247396000 |
| 6  | 3.780986000  | 2.327286000  | -0.061918000 |
| 6  | 3.672865000  | -2.617263000 | -0.548521000 |
| 6  | 1.819581000  | -1.899858000 | -1.930628000 |
| 6  | 4.191887000  | -0.216071000 | 2.386260000  |
| 6  | 2.041879000  | -1.312414000 | 2.545244000  |
| 6  | 5.931227000  | 1.454541000  | -1.600569000 |
| 1  | 4.982459000  | -0.478518000 | -1.576822000 |
| 6  | 4.790572000  | 3.215219000  | -0.408329000 |
| 1  | 2.937540000  | 2.665203000  | 0.542005000  |
| 6  | 3.796928000  | -3.767767000 | -1.316987000 |
| 1  | 4.341435000  | -2.450409000 | 0.295578000  |
| 6  | 1.952530000  | -3.050962000 | -2.700102000 |
| 1  | 1.033440000  | -1.178336000 | -2.160183000 |
| 6  | 4.471541000  | -0.590407000 | 3.697850000  |
| 1  | 4.922470000  | 0.356606000  | 1.817145000  |
| 6  | 2.329213000  | -1.688832000 | 3.850271000  |
| 1  | 1.090988000  | -1.596023000 | 2.090325000  |
| 6  | 5.865512000  | 2.778486000  | -1.179359000 |
| 1  | 6.767927000  | 1.116244000  | -2.206314000 |
| 1  | 4.738659000  | 4.250570000  | -0.081376000 |
| 6  | 2.940035000  | -3.981759000 | -2.394436000 |
| 1  | 4.563236000  | -4.499924000 | -1.075794000 |
| 1  | 1.283091000  | -3.219148000 | -3.539950000 |
| 6  | 3.543014000  | -1.323086000 | 4.428591000  |

|                                              |              |              |                             |
|----------------------------------------------|--------------|--------------|-----------------------------|
| 1                                            | 5.419629000  | -0.307402000 | 4.147960000                 |
| 1                                            | 1.604745000  | -2.264000000 | 4.421302000                 |
| 1                                            | 6.652840000  | 3.475225000  | -1.455501000                |
| 1                                            | 3.041006000  | -4.882207000 | -2.995207000                |
| 1                                            | 3.764092000  | -1.611159000 | 5.453193000                 |
| 1                                            | -1.343965000 | -4.286571000 | -2.557563000                |
| 6                                            | -3.514108000 | 1.252738000  | 2.025242000                 |
| 1                                            | -4.428165000 | 1.344969000  | 2.621813000                 |
| 1                                            | -2.775390000 | 0.706334000  | 2.621727000                 |
| 1                                            | -3.119620000 | 2.256501000  | 1.863595000                 |
| Zero-point correction=                       |              |              | 0.611047 (Hartree/Particle) |
| Thermal correction to Energy=                |              |              | 0.648426                    |
| Thermal correction to Enthalpy=              |              |              | 0.649370                    |
| Thermal correction to Gibbs Free Energy=     |              |              | 0.537358                    |
| Sum of electronic and zero-point Energies=   |              |              | -2056.970945                |
| Sum of electronic and thermal Energies=      |              |              | -2056.933566                |
| Sum of electronic and thermal Enthalpies=    |              |              | -2056.932621                |
| Sum of electronic and thermal Free Energies= |              |              | -2057.044633                |

#### B-2'

|   |              |              |              |
|---|--------------|--------------|--------------|
| 6 | -1.222751000 | -2.090770000 | -4.188965000 |
| 6 | -0.279001000 | -1.438365000 | -3.415831000 |
| 6 | -0.722609000 | -0.487077000 | -2.485542000 |
| 6 | -2.102079000 | -0.208319000 | -2.338935000 |
| 6 | -3.041006000 | -0.837653000 | -3.134049000 |
| 6 | -2.585177000 | -1.795171000 | -4.040266000 |
| 1 | -0.915909000 | -2.849759000 | -4.903535000 |
| 1 | 0.783163000  | -1.663525000 | -3.499164000 |
| 1 | -4.102050000 | -0.636860000 | -3.018790000 |
| 1 | -3.310196000 | -2.342956000 | -4.637999000 |
| 6 | 0.027195000  | 0.275440000  | -1.544808000 |
| 6 | -0.871879000 | 1.108056000  | -0.790542000 |
| 6 | -2.278834000 | 0.807094000  | -1.280982000 |
| 1 | -3.042486000 | 0.629479000  | -0.524820000 |
| 6 | -1.852445000 | 2.184304000  | -1.614280000 |
| 6 | -0.497766000 | 1.498692000  | 0.598348000  |
| 6 | -1.176750000 | 0.971688000  | 1.696104000  |
| 6 | 0.587748000  | 2.356042000  | 0.810391000  |
| 6 | -0.760935000 | 1.289843000  | 2.987192000  |
| 1 | -2.031268000 | 0.315421000  | 1.539789000  |
| 6 | 1.007399000  | 2.662836000  | 2.099091000  |
| 1 | 1.092767000  | 2.792971000  | -0.053824000 |
| 6 | 0.331759000  | 2.125732000  | 3.192644000  |
| 1 | -1.299675000 | 0.872858000  | 3.835449000  |

|    |              |              |              |
|----|--------------|--------------|--------------|
| 1  | 1.854207000  | 3.329414000  | 2.252060000  |
| 6  | -2.341638000 | 3.288294000  | -0.741837000 |
| 6  | -1.677287000 | 4.523036000  | -0.728530000 |
| 6  | -3.458340000 | 3.124020000  | 0.086512000  |
| 6  | -2.111501000 | 5.555437000  | 0.090352000  |
| 1  | -0.794518000 | 4.672804000  | -1.347564000 |
| 6  | -3.895939000 | 4.160414000  | 0.901400000  |
| 1  | -4.019916000 | 2.193864000  | 0.103900000  |
| 6  | -3.224961000 | 5.377882000  | 0.907966000  |
| 1  | -1.576898000 | 6.502597000  | 0.092782000  |
| 1  | -4.768370000 | 3.997655000  | 1.529693000  |
| 1  | -3.566115000 | 6.188325000  | 1.547968000  |
| 79 | 1.969162000  | 0.001352000  | -0.948911000 |
| 15 | 4.095433000  | -0.315570000 | 0.078613000  |
| 6  | 4.935077000  | -1.874630000 | -0.338837000 |
| 6  | 3.922668000  | -0.260203000 | 1.889219000  |
| 6  | 5.293262000  | 1.001482000  | -0.317285000 |
| 6  | 5.680719000  | -2.602145000 | 0.591215000  |
| 6  | 4.848993000  | -2.321208000 | -1.661322000 |
| 6  | 4.996720000  | 0.092390000  | 2.714825000  |
| 6  | 2.685763000  | -0.577998000 | 2.457366000  |
| 6  | 6.624711000  | 0.741860000  | -0.645067000 |
| 6  | 4.836618000  | 2.322853000  | -0.262944000 |
| 6  | 6.337787000  | -3.763016000 | 0.196619000  |
| 1  | 5.740281000  | -2.266163000 | 1.625118000  |
| 6  | 5.513352000  | -3.476677000 | -2.052569000 |
| 1  | 4.254207000  | -1.758315000 | -2.381676000 |
| 6  | 4.835090000  | 0.108050000  | 4.094578000  |
| 1  | 5.956808000  | 0.361837000  | 2.274681000  |
| 6  | 2.530825000  | -0.564398000 | 3.839674000  |
| 1  | 1.834910000  | -0.823285000 | 1.820064000  |
| 6  | 7.490813000  | 1.798051000  | -0.915356000 |
| 1  | 6.984952000  | -0.284907000 | -0.689422000 |
| 6  | 5.705697000  | 3.372674000  | -0.526888000 |
| 1  | 3.794781000  | 2.522837000  | -0.008317000 |
| 6  | 6.256736000  | -4.198364000 | -1.122381000 |
| 1  | 6.911995000  | -4.331349000 | 0.924142000  |
| 1  | 5.443225000  | -3.820601000 | -3.081443000 |
| 6  | 3.603448000  | -0.222874000 | 4.655838000  |
| 1  | 5.670351000  | 0.383975000  | 4.733749000  |
| 1  | 1.563955000  | -0.808083000 | 4.272933000  |
| 6  | 7.033509000  | 3.109831000  | -0.856186000 |
| 1  | 8.527044000  | 1.592443000  | -1.172865000 |
| 1  | 5.346528000  | 4.397885000  | -0.482526000 |

|                                              |              |              |                             |
|----------------------------------------------|--------------|--------------|-----------------------------|
| 1                                            | 6.769562000  | -5.107935000 | -1.425619000                |
| 1                                            | 3.479194000  | -0.206020000 | 5.736020000                 |
| 1                                            | 7.712527000  | 3.931701000  | -1.070048000                |
| 8                                            | -5.652880000 | 0.928806000  | 1.430489000                 |
| 16                                           | -5.566742000 | -0.449772000 | 0.962654000                 |
| 9                                            | -6.071947000 | -1.485945000 | -1.411095000                |
| 9                                            | -7.482634000 | 0.004468000  | -0.745114000                |
| 9                                            | -5.528960000 | 0.600819000  | -1.442983000                |
| 6                                            | -6.205367000 | -0.338600000 | -0.767153000                |
| 8                                            | -4.241745000 | -3.234995000 | -0.077132000                |
| 8                                            | -2.025117000 | -2.037702000 | -0.012977000                |
| 16                                           | -3.369969000 | -2.238326000 | 0.523543000                 |
| 9                                            | -4.199115000 | -2.914770000 | 2.919986000                 |
| 9                                            | -2.483544000 | -4.011867000 | 2.198838000                 |
| 9                                            | -2.256957000 | -1.976712000 | 2.878958000                 |
| 6                                            | -3.067844000 | -2.821949000 | 2.247746000                 |
| 7                                            | -4.002259000 | -0.770115000 | 0.741915000                 |
| 8                                            | -6.357772000 | -1.492925000 | 1.590743000                 |
| 6                                            | -1.450525000 | 2.599923000  | -3.005330000                |
| 1                                            | -2.319605000 | 3.047207000  | -3.502753000                |
| 1                                            | -0.660589000 | 3.357124000  | -2.984295000                |
| 1                                            | -1.102223000 | 1.766198000  | -3.618383000                |
| 1                                            | 0.658283000  | 2.361816000  | 4.203430000                 |
| Zero-point correction=                       |              |              | 0.670131 (Hartree/Particle) |
| Thermal correction to Energy=                |              |              | 0.722643                    |
| Thermal correction to Enthalpy=              |              |              | 0.723587                    |
| Thermal correction to Gibbs Free Energy=     |              |              | 0.579048                    |
| Sum of electronic and zero-point Energies=   |              |              | -3883.817153                |
| Sum of electronic and thermal Energies=      |              |              | -3883.764641                |
| Sum of electronic and thermal Enthalpies=    |              |              | -3883.763697                |
| Sum of electronic and thermal Free Energies= |              |              | -3883.908236                |

## B-2''

|   |              |              |              |
|---|--------------|--------------|--------------|
| 6 | 1.110451000  | -3.851363000 | -1.229582000 |
| 6 | 0.082217000  | -2.988488000 | -0.867525000 |
| 6 | 0.341652000  | -1.619221000 | -0.825872000 |
| 6 | 1.618672000  | -1.132348000 | -1.163226000 |
| 6 | 2.647245000  | -1.991459000 | -1.514839000 |
| 6 | 2.378190000  | -3.359307000 | -1.548488000 |
| 1 | 0.929912000  | -4.923545000 | -1.260929000 |
| 1 | -0.906588000 | -3.365123000 | -0.608243000 |
| 1 | 3.632836000  | -1.603265000 | -1.759062000 |
| 1 | 3.172603000  | -4.050099000 | -1.820320000 |
| 6 | -0.534197000 | -0.514931000 | -0.461995000 |

|    |              |              |              |
|----|--------------|--------------|--------------|
| 6  | 0.168649000  | 0.653150000  | -0.541433000 |
| 6  | 1.627890000  | 0.358705000  | -1.005700000 |
| 1  | 1.876443000  | 0.898611000  | -1.926698000 |
| 6  | 2.351149000  | 0.872844000  | 0.169070000  |
| 6  | -0.340680000 | 2.000400000  | -0.250657000 |
| 6  | -0.208764000 | 3.053153000  | -1.163683000 |
| 6  | -0.973066000 | 2.256287000  | 0.974602000  |
| 6  | -0.699123000 | 4.319603000  | -0.864687000 |
| 1  | 0.269622000  | 2.871091000  | -2.124992000 |
| 6  | -1.464708000 | 3.521336000  | 1.274024000  |
| 1  | -1.060528000 | 1.444324000  | 1.696010000  |
| 6  | -1.324201000 | 4.559120000  | 0.356307000  |
| 1  | -0.588239000 | 5.123988000  | -1.588525000 |
| 1  | -1.953785000 | 3.698865000  | 2.229729000  |
| 6  | 2.699144000  | 2.275951000  | 0.238462000  |
| 6  | 2.640534000  | 2.963334000  | 1.465000000  |
| 6  | 3.062615000  | 2.992303000  | -0.918941000 |
| 6  | 2.920125000  | 4.318348000  | 1.529059000  |
| 1  | 2.322886000  | 2.442528000  | 2.363883000  |
| 6  | 3.378099000  | 4.336939000  | -0.842560000 |
| 1  | 3.181911000  | 2.465552000  | -1.860394000 |
| 6  | 3.298339000  | 5.004312000  | 0.378071000  |
| 1  | 2.848385000  | 4.840275000  | 2.479308000  |
| 1  | 3.696149000  | 4.867958000  | -1.735632000 |
| 1  | 3.538057000  | 6.063566000  | 0.433258000  |
| 79 | -2.568854000 | -0.550059000 | -0.158242000 |
| 15 | -4.934024000 | -0.384566000 | 0.077476000  |
| 6  | -5.830405000 | -0.754623000 | -1.465579000 |
| 6  | -5.441559000 | 1.299930000  | 0.557751000  |
| 6  | -5.664423000 | -1.483406000 | 1.335116000  |
| 6  | -6.982773000 | -0.067616000 | -1.854785000 |
| 6  | -5.339784000 | -1.792085000 | -2.264760000 |
| 6  | -6.594198000 | 1.540911000  | 1.312373000  |
| 6  | -4.652799000 | 2.376352000  | 0.139410000  |
| 6  | -6.918775000 | -2.078896000 | 1.181338000  |
| 6  | -4.931389000 | -1.705872000 | 2.505104000  |
| 6  | -7.639068000 | -0.421869000 | -3.029279000 |
| 1  | -7.363821000 | 0.748212000  | -1.242293000 |
| 6  | -6.001361000 | -2.146068000 | -3.434109000 |
| 1  | -4.431079000 | -2.316663000 | -1.968167000 |
| 6  | -6.956686000 | 2.843985000  | 1.634467000  |
| 1  | -7.205768000 | 0.706358000  | 1.653628000  |
| 6  | -5.020678000 | 3.677830000  | 0.463027000  |
| 1  | -3.739210000 | 2.198174000  | -0.431002000 |



|                                              |              |              |                             |
|----------------------------------------------|--------------|--------------|-----------------------------|
| 6                                            | -7.434627000 | -2.882623000 | 2.193107000                 |
| 1                                            | -7.490325000 | -1.917536000 | 0.268204000                 |
| 6                                            | -5.452767000 | -2.504725000 | 3.515143000                 |
| 1                                            | -3.944995000 | -1.254477000 | 2.616244000                 |
| 6                                            | -7.150294000 | -1.459647000 | -3.816945000                |
| 1                                            | -8.532860000 | 0.118593000  | -3.331648000                |
| 1                                            | -5.613926000 | -2.951689000 | -4.052676000                |
| 6                                            | -6.171142000 | 3.911981000  | 1.209576000                 |
| 1                                            | -7.852327000 | 3.025839000  | 2.223640000                 |
| 1                                            | -4.394682000 | 4.506150000  | 0.138759000                 |
| 6                                            | -6.704196000 | -3.094136000 | 3.358391000                 |
| 1                                            | -8.409558000 | -3.347816000 | 2.068179000                 |
| 1                                            | -4.877400000 | -2.676518000 | 4.421384000                 |
| 1                                            | -7.663684000 | -1.730666000 | -4.736410000                |
| 1                                            | -6.453822000 | 4.929908000  | 1.467679000                 |
| 1                                            | -7.108517000 | -3.726905000 | 4.144780000                 |
| 8                                            | 6.243359000  | -1.719214000 | 2.678373000                 |
| 16                                           | 6.490636000  | -1.753071000 | 1.247599000                 |
| 9                                            | 5.568662000  | -3.310531000 | -0.655325000                |
| 9                                            | 6.152545000  | -4.335426000 | 1.153461000                 |
| 9                                            | 4.317697000  | -3.198553000 | 1.102013000                 |
| 6                                            | 5.574299000  | -3.246491000 | 0.671832000                 |
| 8                                            | 6.772666000  | -0.600699000 | -1.768813000                |
| 8                                            | 4.571666000  | 0.536422000  | -1.369536000                |
| 16                                           | 5.873661000  | 0.080242000  | -0.856006000                |
| 9                                            | 7.895479000  | 1.398050000  | 0.134615000                 |
| 9                                            | 6.883199000  | 2.384017000  | -1.500670000                |
| 9                                            | 5.980349000  | 2.342213000  | 0.457622000                 |
| 6                                            | 6.718475000  | 1.652548000  | -0.405073000                |
| 7                                            | 5.595947000  | -0.583068000 | 0.569854000                 |
| 8                                            | 7.836791000  | -1.891375000 | 0.724120000                 |
| 6                                            | 2.624612000  | -0.012897000 | 1.293488000                 |
| 1                                            | 3.680213000  | -0.342744000 | 1.120262000                 |
| 1                                            | 2.636279000  | 0.483472000  | 2.266179000                 |
| 1                                            | 2.010011000  | -0.916835000 | 1.298046000                 |
| 1                                            | -1.696149000 | 5.553826000  | 0.593717000                 |
| Zero-point correction=                       |              |              | 0.669350 (Hartree/Particle) |
| Thermal correction to Energy=                |              |              | 0.721787                    |
| Thermal correction to Enthalpy=              |              |              | 0.722732                    |
| Thermal correction to Gibbs Free Energy=     |              |              | 0.577882                    |
| Sum of electronic and zero-point Energies=   |              |              | -3883.815557                |
| Sum of electronic and thermal Energies=      |              |              | -3883.763120                |
| Sum of electronic and thermal Enthalpies=    |              |              | -3883.762176                |
| Sum of electronic and thermal Free Energies= |              |              | -3883.907026                |

**B-TSa1**

|    |              |              |              |
|----|--------------|--------------|--------------|
| 6  | -1.956831000 | -3.539091000 | -3.173886000 |
| 6  | -0.912074000 | -2.787543000 | -2.640768000 |
| 6  | -1.158150000 | -1.483117000 | -2.229455000 |
| 6  | -2.448404000 | -0.928539000 | -2.344638000 |
| 6  | -3.496514000 | -1.696030000 | -2.841464000 |
| 6  | -3.236091000 | -2.998016000 | -3.272916000 |
| 1  | -1.776284000 | -4.559724000 | -3.504377000 |
| 1  | 0.089001000  | -3.204842000 | -2.539184000 |
| 1  | -4.515343000 | -1.319800000 | -2.876588000 |
| 1  | -4.049816000 | -3.599277000 | -3.672347000 |
| 6  | -0.240416000 | -0.508910000 | -1.652490000 |
| 6  | -0.925814000 | 0.629513000  | -1.369377000 |
| 6  | -2.406633000 | 0.425711000  | -1.714496000 |
| 1  | -2.759664000 | 0.109991000  | -0.532655000 |
| 6  | -3.303713000 | 1.476659000  | -2.033151000 |
| 6  | -0.314365000 | 1.861070000  | -0.828111000 |
| 6  | 0.215063000  | 1.877075000  | 0.469343000  |
| 6  | -0.167450000 | 3.005779000  | -1.620469000 |
| 6  | 0.865340000  | 3.004561000  | 0.960884000  |
| 1  | 0.105647000  | 0.990506000  | 1.091066000  |
| 6  | 0.482416000  | 4.134081000  | -1.131404000 |
| 1  | -0.562039000 | 3.001858000  | -2.636097000 |
| 6  | 0.998729000  | 4.138222000  | 0.163293000  |
| 1  | 1.273725000  | 2.991311000  | 1.970415000  |
| 1  | 0.587466000  | 5.013158000  | -1.764301000 |
| 6  | -3.289614000 | 2.735450000  | -1.305421000 |
| 6  | -3.568747000 | 3.949678000  | -1.960728000 |
| 6  | -2.969938000 | 2.774903000  | 0.063451000  |
| 6  | -3.489713000 | 5.153451000  | -1.279906000 |
| 1  | -3.790299000 | 3.958271000  | -3.025099000 |
| 6  | -2.931428000 | 3.977396000  | 0.749905000  |
| 1  | -2.790616000 | 1.850005000  | 0.599342000  |
| 6  | -3.176072000 | 5.170654000  | 0.077940000  |
| 1  | -3.676425000 | 6.084849000  | -1.808391000 |
| 1  | -2.690443000 | 3.973265000  | 1.810041000  |
| 1  | -3.127744000 | 6.117021000  | 0.611387000  |
| 79 | 1.725041000  | -0.688108000 | -1.085127000 |
| 15 | 3.800190000  | -0.446864000 | 0.052921000  |
| 6  | 3.391858000  | -0.009607000 | 1.779143000  |
| 6  | 4.721079000  | 1.007384000  | -0.561736000 |
| 6  | 5.028459000  | -1.789595000 | 0.108786000  |
| 6  | 4.228190000  | 0.798639000  | 2.556601000  |

|    |              |              |              |
|----|--------------|--------------|--------------|
| 6  | 2.164129000  | -0.430264000 | 2.300475000  |
| 6  | 6.108475000  | 1.024073000  | -0.712300000 |
| 6  | 3.975395000  | 2.149585000  | -0.877553000 |
| 6  | 5.786804000  | -2.074795000 | 1.245905000  |
| 6  | 5.238223000  | -2.520546000 | -1.064974000 |
| 6  | 3.842019000  | 1.171822000  | 3.839115000  |
| 1  | 5.175425000  | 1.151718000  | 2.148575000  |
| 6  | 1.771799000  | -0.040378000 | 3.576274000  |
| 1  | 1.483318000  | -1.036272000 | 1.702645000  |
| 6  | 6.743850000  | 2.173861000  | -1.174353000 |
| 1  | 6.694225000  | 0.138172000  | -0.470226000 |
| 6  | 4.615481000  | 3.295961000  | -1.329039000 |
| 1  | 2.889702000  | 2.142922000  | -0.764923000 |
| 6  | 6.750769000  | -3.077109000 | 1.204605000  |
| 1  | 5.619106000  | -1.515840000 | 2.165209000  |
| 6  | 6.208177000  | -3.514570000 | -1.104722000 |
| 1  | 4.634576000  | -2.304210000 | -1.946939000 |
| 6  | 2.611788000  | 0.757891000  | 4.346702000  |
| 1  | 4.496072000  | 1.800308000  | 4.439296000  |
| 1  | 0.796308000  | -0.350648000 | 3.944776000  |
| 6  | 5.999918000  | 3.308083000  | -1.481950000 |
| 1  | 7.824730000  | 2.181071000  | -1.294587000 |
| 1  | 4.024689000  | 4.177395000  | -1.569367000 |
| 6  | 6.964288000  | -3.793156000 | 0.030839000  |
| 1  | 7.335951000  | -3.300673000 | 2.093481000  |
| 1  | 6.368738000  | -4.078450000 | -2.020397000 |
| 1  | 2.305026000  | 1.068271000  | 5.343063000  |
| 1  | 6.499683000  | 4.203452000  | -1.844735000 |
| 1  | 7.718364000  | -4.576169000 | 0.001870000  |
| 8  | -5.272494000 | -0.137727000 | -0.532117000 |
| 16 | -4.824933000 | -0.827457000 | 0.671607000  |
| 9  | -3.649239000 | -3.079542000 | -0.086422000 |
| 9  | -5.284714000 | -3.352523000 | 1.291715000  |
| 9  | -5.687129000 | -2.838386000 | -0.757136000 |
| 6  | -4.853113000 | -2.665689000 | 0.258095000  |
| 8  | -2.929429000 | -2.245524000 | 2.583628000  |
| 8  | -0.918341000 | -1.079151000 | 1.577967000  |
| 16 | -2.313778000 | -1.076075000 | 1.985318000  |
| 9  | -3.619495000 | 0.491061000  | 3.654289000  |
| 9  | -1.675904000 | -0.161823000 | 4.324756000  |
| 9  | -1.840573000 | 1.366614000  | 2.805703000  |
| 6  | -2.384276000 | 0.246224000  | 3.278466000  |
| 7  | -3.222050000 | -0.453206000 | 0.775259000  |
| 8  | -5.553561000 | -0.676489000 | 1.913520000  |

|                                              |              |             |                             |
|----------------------------------------------|--------------|-------------|-----------------------------|
| 6                                            | -4.334362000 | 1.299039000 | -3.082812000                |
| 1                                            | -3.983147000 | 0.666643000 | -3.903183000                |
| 1                                            | -5.187281000 | 0.791511000 | -2.608719000                |
| 1                                            | -4.715587000 | 2.249866000 | -3.461211000                |
| 1                                            | 1.508463000  | 5.020463000 | 0.545422000                 |
| Zero-point correction=                       |              |             | 0.665088 (Hartree/Particle) |
| Thermal correction to Energy=                |              |             | 0.716716                    |
| Thermal correction to Enthalpy=              |              |             | 0.717660                    |
| Thermal correction to Gibbs Free Energy=     |              |             | 0.578794                    |
| Sum of electronic and zero-point Energies=   |              |             | -3883.813079                |
| Sum of electronic and thermal Energies=      |              |             | -3883.761452                |
| Sum of electronic and thermal Enthalpies=    |              |             | -3883.760507                |
| Sum of electronic and thermal Free Energies= |              |             | -3883.899373                |

### B-1a

|   |              |              |              |
|---|--------------|--------------|--------------|
| 6 | -2.519749000 | -2.553512000 | -3.805038000 |
| 6 | -1.589530000 | -1.868176000 | -3.025011000 |
| 6 | -2.001984000 | -0.754642000 | -2.303908000 |
| 6 | -3.342236000 | -0.298190000 | -2.364266000 |
| 6 | -4.263043000 | -1.003839000 | -3.134837000 |
| 6 | -3.842342000 | -2.124938000 | -3.854736000 |
| 1 | -2.211465000 | -3.427807000 | -4.374292000 |
| 1 | -0.554110000 | -2.200147000 | -2.966967000 |
| 1 | -5.305162000 | -0.708964000 | -3.200935000 |
| 1 | -4.563197000 | -2.664997000 | -4.464943000 |
| 6 | -1.232902000 | 0.102502000  | -1.405149000 |
| 6 | -2.091222000 | 1.044431000  | -0.893168000 |
| 6 | -3.456147000 | 0.840150000  | -1.430280000 |
| 1 | -0.715171000 | -1.525123000 | -0.003449000 |
| 6 | -4.600046000 | 1.488309000  | -1.070022000 |
| 6 | -1.609527000 | 2.203474000  | -0.112297000 |
| 6 | -0.853064000 | 2.024398000  | 1.053559000  |
| 6 | -1.792913000 | 3.508700000  | -0.584311000 |
| 6 | -0.280366000 | 3.107182000  | 1.712923000  |
| 1 | -0.731831000 | 1.019754000  | 1.456270000  |
| 6 | -1.225082000 | 4.593538000  | 0.075099000  |
| 1 | -2.377044000 | 3.664983000  | -1.490102000 |
| 6 | -0.463092000 | 4.398488000  | 1.225600000  |
| 1 | 0.316021000  | 2.931979000  | 2.608403000  |
| 1 | -1.376520000 | 5.598361000  | -0.314709000 |
| 6 | -4.679940000 | 2.355901000  | 0.121794000  |
| 6 | -5.275700000 | 3.622070000  | 0.054264000  |
| 6 | -4.195816000 | 1.910936000  | 1.357830000  |
| 6 | -5.348092000 | 4.434910000  | 1.177419000  |

|    |              |              |              |
|----|--------------|--------------|--------------|
| 1  | -5.653872000 | 3.986915000  | -0.900200000 |
| 6  | -4.276736000 | 2.720624000  | 2.484008000  |
| 1  | -3.754404000 | 0.917841000  | 1.429244000  |
| 6  | -4.847665000 | 3.986171000  | 2.396823000  |
| 1  | -5.794605000 | 5.423962000  | 1.100971000  |
| 1  | -3.889915000 | 2.357174000  | 3.433378000  |
| 1  | -4.906514000 | 4.620864000  | 3.278101000  |
| 79 | 0.790320000  | 0.223181000  | -1.013725000 |
| 15 | 2.976779000  | 0.772888000  | -0.244081000 |
| 6  | 4.356509000  | -0.358083000 | -0.605683000 |
| 6  | 2.929046000  | 0.995527000  | 1.570926000  |
| 6  | 3.489050000  | 2.414686000  | -0.852995000 |
| 6  | 5.520558000  | -0.402179000 | 0.166685000  |
| 6  | 4.228611000  | -1.199257000 | -1.714615000 |
| 6  | 3.737874000  | 1.925040000  | 2.231600000  |
| 6  | 2.007739000  | 0.246383000  | 2.308665000  |
| 6  | 4.779607000  | 2.707462000  | -1.295626000 |
| 6  | 2.516053000  | 3.421097000  | -0.832134000 |
| 6  | 6.551821000  | -1.267874000 | -0.179485000 |
| 1  | 5.616080000  | 0.237023000  | 1.043766000  |
| 6  | 5.263964000  | -2.060573000 | -2.059968000 |
| 1  | 3.307802000  | -1.183480000 | -2.298602000 |
| 6  | 3.637643000  | 2.082831000  | 3.610029000  |
| 1  | 4.434356000  | 2.541056000  | 1.663198000  |
| 6  | 1.907508000  | 0.404107000  | 3.685695000  |
| 1  | 1.349126000  | -0.449228000 | 1.791081000  |
| 6  | 5.094092000  | 4.000327000  | -1.707291000 |
| 1  | 5.538961000  | 1.927242000  | -1.320553000 |
| 6  | 2.838296000  | 4.710149000  | -1.233499000 |
| 1  | 1.504523000  | 3.194721000  | -0.491540000 |
| 6  | 6.424659000  | -2.093757000 | -1.293570000 |
| 1  | 7.455410000  | -1.301392000 | 0.424631000  |
| 1  | 5.159056000  | -2.713592000 | -2.922680000 |
| 6  | 2.725499000  | 1.322877000  | 4.337633000  |
| 1  | 4.268062000  | 2.809655000  | 4.116876000  |
| 1  | 1.181439000  | -0.183945000 | 4.242494000  |
| 6  | 4.128063000  | 5.000417000  | -1.673194000 |
| 1  | 6.099754000  | 4.225163000  | -2.054980000 |
| 1  | 2.074322000  | 5.483970000  | -1.205457000 |
| 1  | 7.232100000  | -2.771779000 | -1.559957000 |
| 1  | 2.645030000  | 1.454716000  | 5.414061000  |
| 1  | 4.379500000  | 6.008850000  | -1.993699000 |
| 8  | -1.908774000 | -0.950933000 | 2.311550000  |
| 16 | -1.878020000 | -2.324963000 | 1.857764000  |

|                                              |              |              |                             |
|----------------------------------------------|--------------|--------------|-----------------------------|
| 9                                            | -3.358475000 | -3.652982000 | 0.164716000                 |
| 9                                            | -4.392421000 | -2.883952000 | 1.899937000                 |
| 9                                            | -3.816818000 | -1.548983000 | 0.303849000                 |
| 6                                            | -3.483385000 | -2.628415000 | 0.978621000                 |
| 8                                            | -0.516317000 | -4.936164000 | 0.472847000                 |
| 8                                            | 0.638996000  | -3.411143000 | -1.209063000                |
| 16                                           | 0.143338000  | -3.707145000 | 0.114763000                 |
| 9                                            | 1.185447000  | -3.280423000 | 2.483708000                 |
| 9                                            | 2.286178000  | -4.641619000 | 1.214988000                 |
| 9                                            | 2.341172000  | -2.517704000 | 0.831184000                 |
| 6                                            | 1.594255000  | -3.521846000 | 1.253352000                 |
| 7                                            | -0.780554000 | -2.382563000 | 0.588607000                 |
| 8                                            | -1.650917000 | -3.446122000 | 2.734612000                 |
| 1                                            | -0.016164000 | 5.247695000  | 1.738383000                 |
| 6                                            | -5.889663000 | 1.298179000  | -1.816301000                |
| 1                                            | -5.748992000 | 1.321149000  | -2.901966000                |
| 1                                            | -6.345309000 | 0.330040000  | -1.562819000                |
| 1                                            | -6.618717000 | 2.066745000  | -1.544003000                |
| Zero-point correction=                       |              |              | 0.670115 (Hartree/Particle) |
| Thermal correction to Energy=                |              |              | 0.722485                    |
| Thermal correction to Enthalpy=              |              |              | 0.723430                    |
| Thermal correction to Gibbs Free Energy=     |              |              | 0.582326                    |
| Sum of electronic and zero-point Energies=   |              |              | -3883.846708                |
| Sum of electronic and thermal Energies=      |              |              | -3883.794338                |
| Sum of electronic and thermal Enthalpies=    |              |              | -3883.793394                |
| Sum of electronic and thermal Free Energies= |              |              | -3883.934498                |

### B-TSa2

|   |              |              |              |
|---|--------------|--------------|--------------|
| 6 | -2.601480000 | -1.696829000 | -4.109449000 |
| 6 | -1.717151000 | -1.431594000 | -3.066758000 |
| 6 | -1.960063000 | -0.336799000 | -2.249392000 |
| 6 | -3.074779000 | 0.505656000  | -2.447671000 |
| 6 | -3.964987000 | 0.212969000  | -3.481469000 |
| 6 | -3.715031000 | -0.883223000 | -4.307498000 |
| 1 | -2.431693000 | -2.548905000 | -4.763934000 |
| 1 | -0.859133000 | -2.073932000 | -2.866649000 |
| 1 | -4.855358000 | 0.806809000  | -3.661567000 |
| 1 | -4.406958000 | -1.104926000 | -5.117113000 |
| 6 | -1.222028000 | 0.090377000  | -1.054749000 |
| 6 | -1.883418000 | 1.201068000  | -0.549269000 |
| 6 | -3.067879000 | 1.508577000  | -1.363193000 |
| 1 | -1.261562000 | -0.990799000 | -0.224813000 |
| 6 | -3.985679000 | 2.502599000  | -1.148354000 |
| 6 | -1.304602000 | 1.984744000  | 0.558611000  |

|    |              |              |              |
|----|--------------|--------------|--------------|
| 6  | -0.995131000 | 1.368033000  | 1.775508000  |
| 6  | -0.941005000 | 3.321129000  | 0.365698000  |
| 6  | -0.338190000 | 2.074934000  | 2.774760000  |
| 1  | -1.293933000 | 0.335145000  | 1.939063000  |
| 6  | -0.292341000 | 4.028031000  | 1.370809000  |
| 1  | -1.174734000 | 3.803450000  | -0.582596000 |
| 6  | 0.016928000  | 3.406355000  | 2.577771000  |
| 1  | -0.110698000 | 1.581415000  | 3.718144000  |
| 1  | -0.021601000 | 5.069132000  | 1.207851000  |
| 6  | -4.059176000 | 3.261298000  | 0.111335000  |
| 6  | -4.127257000 | 4.661297000  | 0.099760000  |
| 6  | -4.061663000 | 2.594815000  | 1.343428000  |
| 6  | -4.130584000 | 5.379005000  | 1.287433000  |
| 1  | -4.124406000 | 5.192826000  | -0.851235000 |
| 6  | -4.081616000 | 3.316052000  | 2.530179000  |
| 1  | -4.046185000 | 1.506653000  | 1.362784000  |
| 6  | -4.102287000 | 4.706509000  | 2.506922000  |
| 1  | -4.153108000 | 6.466060000  | 1.262819000  |
| 1  | -4.070070000 | 2.783834000  | 3.478484000  |
| 1  | -4.107104000 | 5.268121000  | 3.438346000  |
| 79 | 0.878657000  | 0.066694000  | -0.751241000 |
| 15 | 3.183316000  | 0.342165000  | -0.365727000 |
| 6  | 4.176498000  | -1.176408000 | -0.254433000 |
| 6  | 3.479868000  | 1.198543000  | 1.220017000  |
| 6  | 3.963407000  | 1.406108000  | -1.623390000 |
| 6  | 5.427209000  | -1.175767000 | 0.375148000  |
| 6  | 3.671279000  | -2.358507000 | -0.799950000 |
| 6  | 4.210320000  | 2.383190000  | 1.317750000  |
| 6  | 2.933575000  | 0.622865000  | 2.372168000  |
| 6  | 5.231262000  | 1.154110000  | -2.149537000 |
| 6  | 3.249861000  | 2.533941000  | -2.045826000 |
| 6  | 6.170419000  | -2.346943000 | 0.441512000  |
| 1  | 5.810951000  | -0.256468000 | 0.817664000  |
| 6  | 4.417975000  | -3.530306000 | -0.723989000 |
| 1  | 2.680940000  | -2.371231000 | -1.252664000 |
| 6  | 4.393366000  | 2.985878000  | 2.559661000  |
| 1  | 4.636474000  | 2.836485000  | 0.424144000  |
| 6  | 3.131317000  | 1.220830000  | 3.609351000  |
| 1  | 2.349846000  | -0.294442000 | 2.294512000  |
| 6  | 5.780371000  | 2.024322000  | -3.086872000 |
| 1  | 5.787710000  | 0.273547000  | -1.833414000 |
| 6  | 3.807082000  | 3.405631000  | -2.972372000 |
| 1  | 2.255301000  | 2.724385000  | -1.638607000 |
| 6  | 5.664494000  | -3.523569000 | -0.107836000 |

|                                              |              |              |                             |
|----------------------------------------------|--------------|--------------|-----------------------------|
| 1                                            | 7.141456000  | -2.345898000 | 0.930999000                 |
| 1                                            | 4.014365000  | -4.451506000 | -1.136419000                |
| 6                                            | 3.858913000  | 2.404933000  | 3.704072000                 |
| 1                                            | 4.961291000  | 3.910613000  | 2.630502000                 |
| 1                                            | 2.708908000  | 0.765924000  | 4.502510000                 |
| 6                                            | 5.072340000  | 3.149145000  | -3.495554000                |
| 1                                            | 6.765545000  | 1.820417000  | -3.499571000                |
| 1                                            | 3.248744000  | 4.281215000  | -3.294495000                |
| 1                                            | 6.243869000  | -4.441925000 | -0.045673000                |
| 1                                            | 4.006633000  | 2.875834000  | 4.673319000                 |
| 1                                            | 5.503901000  | 3.826786000  | -4.228462000                |
| 8                                            | -3.489417000 | -0.795482000 | 1.222693000                 |
| 16                                           | -2.995343000 | -2.161524000 | 1.212480000                 |
| 9                                            | -3.656628000 | -4.284820000 | -0.154062000                |
| 9                                            | -5.312216000 | -3.142607000 | 0.637283000                 |
| 9                                            | -4.215911000 | -2.412690000 | -1.074601000                |
| 6                                            | -4.120797000 | -3.071038000 | 0.065004000                 |
| 8                                            | -0.927550000 | -4.619095000 | 0.739889000                 |
| 8                                            | 0.511297000  | -3.018132000 | -0.585822000                |
| 16                                           | -0.421173000 | -3.286502000 | 0.498572000                 |
| 9                                            | 0.288145000  | -1.490824000 | 2.307979000                 |
| 9                                            | 0.101363000  | -3.497825000 | 3.078357000                 |
| 9                                            | 1.793955000  | -2.959651000 | 1.853587000                 |
| 6                                            | 0.496703000  | -2.780689000 | 2.051099000                 |
| 7                                            | -1.585259000 | -2.139926000 | 0.371894000                 |
| 8                                            | -2.908168000 | -2.942317000 | 2.430291000                 |
| 6                                            | -5.020508000 | 2.843321000  | -2.176006000                |
| 1                                            | -4.614946000 | 2.835589000  | -3.192849000                |
| 1                                            | -5.840187000 | 2.111223000  | -2.142470000                |
| 1                                            | -5.468049000 | 3.821047000  | -1.976344000                |
| 1                                            | 0.530343000  | 3.958524000  | 3.361696000                 |
| Zero-point correction=                       |              |              | 0.665154 (Hartree/Particle) |
| Thermal correction to Energy=                |              |              | 0.716940                    |
| Thermal correction to Enthalpy=              |              |              | 0.717885                    |
| Thermal correction to Gibbs Free Energy=     |              |              | 0.578849                    |
| Sum of electronic and zero-point Energies=   |              |              | -3883.841149                |
| Sum of electronic and thermal Energies=      |              |              | -3883.789362                |
| Sum of electronic and thermal Enthalpies=    |              |              | -3883.788418                |
| Sum of electronic and thermal Free Energies= |              |              | -3883.927453                |

### B-2a

|   |              |              |              |
|---|--------------|--------------|--------------|
| 6 | -1.567426000 | -4.336553000 | -1.943897000 |
| 6 | -1.004090000 | -3.482207000 | -1.002907000 |
| 6 | -1.085069000 | -2.112665000 | -1.212725000 |



|    |              |              |              |
|----|--------------|--------------|--------------|
| 6  | -1.739665000 | -1.567528000 | -2.336173000 |
| 6  | -2.309520000 | -2.438767000 | -3.265709000 |
| 6  | -2.205773000 | -3.814118000 | -3.066923000 |
| 1  | -1.514140000 | -5.413422000 | -1.802554000 |
| 1  | -0.507460000 | -3.869871000 | -0.114451000 |
| 1  | -2.823301000 | -2.083460000 | -4.151359000 |
| 1  | -2.639806000 | -4.488612000 | -3.801368000 |
| 6  | -0.522202000 | -1.022366000 | -0.415835000 |
| 6  | -0.858266000 | 0.196091000  | -1.054983000 |
| 6  | -1.702747000 | -0.095274000 | -2.201453000 |
| 1  | -0.495733000 | -1.063881000 | 0.683529000  |
| 6  | -2.550126000 | 0.798663000  | -2.821951000 |
| 6  | -0.280833000 | 1.490801000  | -0.653392000 |
| 6  | -0.041982000 | 1.779180000  | 0.696526000  |
| 6  | 0.154456000  | 2.400364000  | -1.627642000 |
| 6  | 0.587865000  | 2.963385000  | 1.058885000  |
| 1  | -0.375738000 | 1.081366000  | 1.462744000  |
| 6  | 0.766375000  | 3.591169000  | -1.259341000 |
| 1  | 0.004913000  | 2.165062000  | -2.679331000 |
| 6  | 0.987469000  | 3.876906000  | 0.087079000  |
| 1  | 0.765046000  | 3.168989000  | 2.112891000  |
| 1  | 1.077753000  | 4.296120000  | -2.027918000 |
| 6  | -2.760331000 | 2.178318000  | -2.357092000 |
| 6  | -2.703545000 | 3.237138000  | -3.274737000 |
| 6  | -3.034767000 | 2.455979000  | -1.012142000 |
| 6  | -2.834799000 | 4.549037000  | -2.842622000 |
| 1  | -2.504023000 | 3.028909000  | -4.325523000 |
| 6  | -3.197580000 | 3.769068000  | -0.590335000 |
| 1  | -3.133019000 | 1.635710000  | -0.303597000 |
| 6  | -3.080540000 | 4.816907000  | -1.497587000 |
| 1  | -2.754149000 | 5.364639000  | -3.557597000 |
| 1  | -3.417057000 | 3.967170000  | 0.455543000  |
| 1  | -3.197523000 | 5.844551000  | -1.161016000 |
| 79 | 1.672385000  | -0.889546000 | -0.491361000 |
| 15 | 3.853115000  | -0.346907000 | 0.187291000  |
| 6  | 5.012174000  | -1.703079000 | 0.520473000  |
| 6  | 3.630415000  | 0.588580000  | 1.737383000  |
| 6  | 4.705323000  | 0.801062000  | -0.935806000 |
| 6  | 6.006714000  | -1.595060000 | 1.496795000  |
| 6  | 4.926244000  | -2.856600000 | -0.263341000 |
| 6  | 4.446568000  | 1.677002000  | 2.059381000  |
| 6  | 2.577296000  | 0.238953000  | 2.589649000  |
| 6  | 6.044859000  | 0.651805000  | -1.295947000 |
| 6  | 3.962836000  | 1.879503000  | -1.429514000 |

|    |              |              |              |
|----|--------------|--------------|--------------|
| 6  | 6.911712000  | -2.634431000 | 1.678708000  |
| 1  | 6.067544000  | -0.700399000 | 2.115214000  |
| 6  | 5.836457000  | -3.891044000 | -0.080257000 |
| 1  | 4.140008000  | -2.941973000 | -1.013466000 |
| 6  | 4.208171000  | 2.403060000  | 3.221536000  |
| 1  | 5.257749000  | 1.967361000  | 1.392389000  |
| 6  | 2.338519000  | 0.969803000  | 3.747245000  |
| 1  | 1.922963000  | -0.596348000 | 2.337854000  |
| 6  | 6.637157000  | 1.579518000  | -2.149365000 |
| 1  | 6.624077000  | -0.187063000 | -0.913088000 |
| 6  | 4.562503000  | 2.804847000  | -2.271871000 |
| 1  | 2.914287000  | 2.000244000  | -1.148259000 |
| 6  | 6.827620000  | -3.779080000 | 0.890221000  |
| 1  | 7.682609000  | -2.551925000 | 2.440880000  |
| 1  | 5.767111000  | -4.788226000 | -0.689972000 |
| 6  | 3.154084000  | 2.053656000  | 4.061458000  |
| 1  | 4.841932000  | 3.251961000  | 3.466695000  |
| 1  | 1.501301000  | 0.699611000  | 4.386306000  |
| 6  | 5.899459000  | 2.653207000  | -2.635511000 |
| 1  | 7.679789000  | 1.460526000  | -2.433830000 |
| 1  | 3.980111000  | 3.642789000  | -2.648532000 |
| 1  | 7.535930000  | -4.590643000 | 1.038154000  |
| 1  | 2.962108000  | 2.633492000  | 4.961144000  |
| 1  | 6.365844000  | 3.373933000  | -3.302923000 |
| 8  | -4.768207000 | -0.397434000 | -1.086224000 |
| 16 | -4.812299000 | -0.730247000 | 0.334925000  |
| 9  | -4.901912000 | -3.036421000 | 1.587187000  |
| 9  | -6.068815000 | -2.921334000 | -0.225325000 |
| 9  | -3.922799000 | -3.105934000 | -0.331335000 |
| 6  | -4.925817000 | -2.572414000 | 0.351361000  |
| 8  | -3.842943000 | -1.100830000 | 3.402714000  |
| 8  | -1.547769000 | -0.406747000 | 2.643235000  |
| 16 | -3.007234000 | -0.327808000 | 2.500409000  |
| 9  | -2.541263000 | 2.243127000  | 2.237346000  |
| 9  | -4.606287000 | 1.763464000  | 2.609992000  |
| 9  | -3.161480000 | 1.629749000  | 4.210155000  |
| 6  | -3.364775000 | 1.438195000  | 2.914693000  |
| 7  | -3.337108000 | -0.419504000 | 0.931556000  |
| 8  | -5.932580000 | -0.280527000 | 1.145420000  |
| 6  | -3.426173000 | 0.365080000  | -3.948040000 |
| 1  | -2.874938000 | -0.153916000 | -4.738931000 |
| 1  | -4.172276000 | -0.329917000 | -3.532951000 |
| 1  | -3.970929000 | 1.207371000  | -4.380045000 |
| 1  | 1.471615000  | 4.806909000  | 0.376200000  |

|                                              |                             |
|----------------------------------------------|-----------------------------|
| Zero-point correction=                       | 0.669800 (Hartree/Particle) |
| Thermal correction to Energy=                | 0.722246                    |
| Thermal correction to Enthalpy=              | 0.723190                    |
| Thermal correction to Gibbs Free Energy=     | 0.579139                    |
| Sum of electronic and zero-point Energies=   | -3883.848693                |
| Sum of electronic and thermal Energies=      | -3883.796247                |
| Sum of electronic and thermal Enthalpies=    | -3883.795303                |
| Sum of electronic and thermal Free Energies= | -3883.939354                |

### B-TSd1

|   |              |              |              |
|---|--------------|--------------|--------------|
| 6 | 1.426833000  | 5.025494000  | -0.040172000 |
| 6 | 2.798793000  | 5.213470000  | 0.111615000  |
| 6 | 3.649406000  | 4.122131000  | 0.280470000  |
| 6 | 3.120885000  | 2.836279000  | 0.298945000  |
| 6 | 1.734388000  | 2.648450000  | 0.137830000  |
| 6 | 0.889194000  | 3.743915000  | -0.026002000 |
| 1 | 0.774261000  | 5.884935000  | -0.168606000 |
| 1 | 3.211576000  | 6.218926000  | 0.100838000  |
| 1 | 4.720234000  | 4.273125000  | 0.400860000  |
| 1 | -0.181723000 | 3.585035000  | -0.146158000 |
| 6 | 3.912739000  | 1.604953000  | 0.489636000  |
| 6 | 4.644397000  | 0.996059000  | -0.505823000 |
| 6 | 1.331634000  | 1.253572000  | 0.155111000  |
| 6 | 2.204676000  | 0.291429000  | 0.224937000  |
| 6 | 2.517910000  | -1.100041000 | 0.128751000  |
| 6 | 2.135108000  | -1.804539000 | -1.028327000 |
| 6 | 3.200939000  | -1.775614000 | 1.152532000  |
| 6 | 2.411915000  | -3.159405000 | -1.141011000 |
| 1 | 1.602665000  | -1.273742000 | -1.816378000 |
| 6 | 3.497390000  | -3.123852000 | 1.019374000  |
| 1 | 3.489514000  | -1.230972000 | 2.048716000  |
| 6 | 3.099685000  | -3.816646000 | -0.122473000 |
| 1 | 2.100117000  | -3.703362000 | -2.029284000 |
| 1 | 4.033712000  | -3.639389000 | 1.811841000  |
| 1 | 4.088471000  | 1.295361000  | 1.523748000  |
| 6 | 5.546510000  | -0.110292000 | -0.188598000 |
| 6 | 6.193923000  | -0.180421000 | 1.057072000  |
| 6 | 5.774050000  | -1.138461000 | -1.117346000 |
| 6 | 7.019894000  | -1.249076000 | 1.369887000  |
| 1 | 6.078286000  | 0.631968000  | 1.771360000  |
| 6 | 6.586970000  | -2.215734000 | -0.796292000 |
| 1 | 5.281800000  | -1.114496000 | -2.086766000 |
| 6 | 7.211665000  | -2.274461000 | 0.446801000  |
| 1 | 7.527134000  | -1.277456000 | 2.330688000  |

|                               |              |              |                             |
|-------------------------------|--------------|--------------|-----------------------------|
| 1                             | 6.738699000  | -3.011109000 | -1.521375000                |
| 1                             | 7.858612000  | -3.113069000 | 0.691770000                 |
| 79                            | -0.642094000 | 0.540984000  | 0.140401000                 |
| 15                            | -2.863464000 | -0.251535000 | 0.029843000                 |
| 6                             | -3.504709000 | -0.822715000 | 1.629630000                 |
| 6                             | -2.972067000 | -1.670668000 | -1.102119000                |
| 6                             | -4.031495000 | 0.997306000  | -0.580946000                |
| 6                             | -4.352912000 | -1.928772000 | 1.728996000                 |
| 6                             | -3.166076000 | -0.096500000 | 2.775625000                 |
| 6                             | -4.013645000 | -1.811003000 | -2.021003000                |
| 6                             | -1.977932000 | -2.652430000 | -1.018886000                |
| 6                             | -5.365070000 | 1.013384000  | -0.162566000                |
| 6                             | -3.585287000 | 1.928898000  | -1.523929000                |
| 6                             | -4.858629000 | -2.301215000 | 2.970017000                 |
| 1                             | -4.615710000 | -2.498328000 | 0.838551000                 |
| 6                             | -3.677285000 | -0.471397000 | 4.011790000                 |
| 1                             | -2.499190000 | 0.762439000  | 2.695480000                 |
| 6                             | -4.058845000 | -2.928708000 | -2.849351000                |
| 1                             | -4.785882000 | -1.046855000 | -2.094203000                |
| 6                             | -2.032795000 | -3.768832000 | -1.842634000                |
| 1                             | -1.161436000 | -2.539077000 | -0.303535000                |
| 6                             | -6.243987000 | 1.952887000  | -0.690191000                |
| 1                             | -5.714387000 | 0.294679000  | 0.577685000                 |
| 6                             | -4.469012000 | 2.863061000  | -2.050153000                |
| 1                             | -2.542623000 | 1.918828000  | -1.844196000                |
| 6                             | -4.521636000 | -1.574239000 | 4.107982000                 |
| 1                             | -5.516457000 | -3.162979000 | 3.047962000                 |
| 1                             | -3.412496000 | 0.093734000  | 4.901685000                 |
| 6                             | -3.072448000 | -3.905252000 | -2.760102000                |
| 1                             | -4.867782000 | -3.035306000 | -3.567492000                |
| 1                             | -1.261394000 | -4.531976000 | -1.771431000                |
| 6                             | -5.796929000 | 2.874932000  | -1.632203000                |
| 1                             | -7.280208000 | 1.966838000  | -0.362473000                |
| 1                             | -4.120161000 | 3.586476000  | -2.782608000                |
| 1                             | -4.916257000 | -1.871526000 | 5.076319000                 |
| 1                             | -3.111490000 | -4.776107000 | -3.409616000                |
| 1                             | -6.486595000 | 3.609843000  | -2.039730000                |
| 1                             | 3.326275000  | -4.875642000 | -0.218445000                |
| 6                             | 4.467283000  | 1.382722000  | -1.936719000                |
| 1                             | 5.438063000  | 1.518722000  | -2.426089000                |
| 1                             | 3.947952000  | 0.585256000  | -2.486815000                |
| 1                             | 3.881213000  | 2.298460000  | -2.042573000                |
| Zero-point correction=        |              |              | 0.664454 (Hartree/Particle) |
| Thermal correction to Energy= |              |              | 0.716331                    |

|                                              |              |
|----------------------------------------------|--------------|
| Thermal correction to Enthalpy=              | 0.717275     |
| Thermal correction to Gibbs Free Energy=     | 0.572935     |
| Sum of electronic and zero-point Energies=   | -3883.813803 |
| Sum of electronic and thermal Energies=      | -3883.761926 |
| Sum of electronic and thermal Enthalpies=    | -3883.760981 |
| Sum of electronic and thermal Free Energies= | -3883.905322 |

**B-1d**

|   |              |              |              |
|---|--------------|--------------|--------------|
| 6 | -0.881539000 | -4.288108000 | 0.825123000  |
| 6 | 0.147264000  | -3.368222000 | 0.632709000  |
| 6 | -0.167390000 | -2.018811000 | 0.498163000  |
| 6 | -1.507587000 | -1.601528000 | 0.563629000  |
| 6 | -2.527820000 | -2.513821000 | 0.776062000  |
| 6 | -2.208843000 | -3.867307000 | 0.897010000  |
| 1 | -0.648023000 | -5.346443000 | 0.923311000  |
| 1 | 1.186850000  | -3.691340000 | 0.584313000  |
| 1 | -3.567259000 | -2.191746000 | 0.843481000  |
| 1 | -3.004016000 | -4.594749000 | 1.047595000  |
| 6 | 0.702246000  | -0.854434000 | 0.301370000  |
| 6 | -0.084885000 | 0.245880000  | 0.228410000  |
| 6 | -1.563792000 | -0.107262000 | 0.411917000  |
| 1 | -1.907703000 | 0.321271000  | 1.367260000  |
| 6 | -2.441455000 | 0.432908000  | -0.698670000 |
| 6 | 0.369423000  | 1.643514000  | 0.082055000  |
| 6 | 0.872314000  | 2.334792000  | 1.190215000  |
| 6 | 0.289089000  | 2.315251000  | -1.143157000 |
| 6 | 1.257849000  | 3.668162000  | 1.085228000  |
| 1 | 0.947273000  | 1.810720000  | 2.142408000  |
| 6 | 0.669173000  | 3.647959000  | -1.250185000 |
| 1 | -0.090087000 | 1.780430000  | -2.013171000 |
| 6 | 1.144856000  | 4.331857000  | -0.133658000 |
| 1 | 1.637813000  | 4.192532000  | 1.959678000  |
| 1 | 0.590851000  | 4.156783000  | -2.208895000 |
| 6 | -2.802269000 | 1.874489000  | -0.671509000 |
| 6 | -3.132352000 | 2.546604000  | -1.857936000 |
| 6 | -2.831283000 | 2.608565000  | 0.521882000  |
| 6 | -3.501083000 | 3.883944000  | -1.849403000 |
| 1 | -3.065883000 | 2.019854000  | -2.807650000 |
| 6 | -3.197068000 | 3.949303000  | 0.531831000  |
| 1 | -2.575183000 | 2.132847000  | 1.463682000  |
| 6 | -3.538698000 | 4.592829000  | -0.651895000 |
| 1 | -3.747079000 | 4.379547000  | -2.785942000 |
| 1 | -3.211453000 | 4.491921000  | 1.474152000  |
| 1 | -3.822006000 | 5.642775000  | -0.644846000 |

|    |              |              |              |
|----|--------------|--------------|--------------|
| 79 | 2.744892000  | -0.728024000 | 0.184859000  |
| 15 | 5.082182000  | -0.287279000 | -0.004210000 |
| 6  | 5.967173000  | -0.094197000 | 1.578532000  |
| 6  | 5.344486000  | 1.282689000  | -0.898326000 |
| 6  | 6.043464000  | -1.517239000 | -0.949576000 |
| 6  | 7.097636000  | 0.718355000  | 1.707104000  |
| 6  | 5.501384000  | -0.809604000 | 2.685057000  |
| 6  | 6.435788000  | 1.486639000  | -1.748200000 |
| 6  | 4.413679000  | 2.309973000  | -0.709087000 |
| 6  | 7.280651000  | -2.008773000 | -0.530612000 |
| 6  | 5.493719000  | -1.965987000 | -2.155692000 |
| 6  | 7.756555000  | 0.806005000  | 2.927964000  |
| 1  | 7.457290000  | 1.288126000  | 0.850922000  |
| 6  | 6.164984000  | -0.722014000 | 3.904005000  |
| 1  | 4.608401000  | -1.427182000 | 2.587118000  |
| 6  | 6.597002000  | 2.707779000  | -2.393800000 |
| 1  | 7.156986000  | 0.685714000  | -1.909336000 |
| 6  | 4.581095000  | 3.528982000  | -1.355590000 |
| 1  | 3.550995000  | 2.157727000  | -0.057051000 |
| 6  | 7.961538000  | -2.937121000 | -1.313801000 |
| 1  | 7.711853000  | -1.668585000 | 0.409400000  |
| 6  | 6.181265000  | -2.883431000 | -2.938804000 |
| 1  | 4.521103000  | -1.591261000 | -2.476633000 |
| 6  | 7.291546000  | 0.085551000  | 4.025120000  |
| 1  | 8.633132000  | 1.442256000  | 3.024486000  |
| 1  | 5.796269000  | -1.278341000 | 4.762251000  |
| 6  | 5.670329000  | 3.728027000  | -2.198566000 |
| 1  | 7.445734000  | 2.860650000  | -3.056420000 |
| 1  | 3.843142000  | 4.313567000  | -1.204171000 |
| 6  | 7.415615000  | -3.371963000 | -2.516299000 |
| 1  | 8.922777000  | -3.321021000 | -0.979989000 |
| 1  | 5.749561000  | -3.226290000 | -3.875989000 |
| 1  | 7.805702000  | 0.160539000  | 4.980561000  |
| 1  | 5.795336000  | 4.679749000  | -2.710107000 |
| 1  | 7.949997000  | -4.097715000 | -3.124807000 |
| 8  | -6.058316000 | -1.071216000 | -2.489980000 |
| 16 | -6.610887000 | -1.200963000 | -1.160823000 |
| 9  | -5.157256000 | -3.336275000 | -0.964382000 |
| 9  | -6.617935000 | -3.113032000 | 0.609442000  |
| 9  | -7.251384000 | -3.696095000 | -1.373396000 |
| 6  | -6.395116000 | -2.973221000 | -0.679227000 |
| 8  | -6.836609000 | -0.586647000 | 2.079220000  |
| 8  | -4.521293000 | 0.461266000  | 1.946413000  |
| 16 | -5.827305000 | 0.179709000  | 1.393257000  |

|                                              |              |              |                             |
|----------------------------------------------|--------------|--------------|-----------------------------|
| 9                                            | -7.878856000 | 1.672640000  | 0.766060000                 |
| 9                                            | -6.346331000 | 2.652491000  | 1.934244000                 |
| 9                                            | -6.033489000 | 2.277896000  | -0.168964000                |
| 6                                            | -6.585441000 | 1.822071000  | 0.937851000                 |
| 7                                            | -5.516051000 | -0.486311000 | -0.117492000                |
| 8                                            | -7.946905000 | -0.796154000 | -0.797744000                |
| 6                                            | -2.858650000 | -0.369790000 | -1.696984000                |
| 1                                            | -2.585671000 | -1.422293000 | -1.720554000                |
| 1                                            | -4.566092000 | -0.318357000 | -0.507875000                |
| 1                                            | -3.481689000 | -0.006553000 | -2.512300000                |
| 1                                            | 1.428483000  | 5.379786000  | -0.213963000                |
| Zero-point correction=                       |              |              | 0.670317 (Hartree/Particle) |
| Thermal correction to Energy=                |              |              | 0.722828                    |
| Thermal correction to Enthalpy=              |              |              | 0.723772                    |
| Thermal correction to Gibbs Free Energy=     |              |              | 0.577817                    |
| Sum of electronic and zero-point Energies=   |              |              | -3883.822283                |
| Sum of electronic and thermal Energies=      |              |              | -3883.769772                |
| Sum of electronic and thermal Enthalpies=    |              |              | -3883.768828                |
| Sum of electronic and thermal Free Energies= |              |              | -3883.914783                |

#### B-TSd2

|   |              |              |              |
|---|--------------|--------------|--------------|
| 6 | 2.207005000  | -1.345924000 | -4.140163000 |
| 6 | 1.364949000  | -0.942318000 | -3.106624000 |
| 6 | 1.872376000  | -0.099756000 | -2.123100000 |
| 6 | 3.199550000  | 0.343208000  | -2.185275000 |
| 6 | 4.046247000  | -0.083147000 | -3.195327000 |
| 6 | 3.535975000  | -0.928456000 | -4.181225000 |
| 1 | 1.827278000  | -2.008219000 | -4.914931000 |
| 1 | 0.340392000  | -1.305300000 | -3.047426000 |
| 1 | 5.092515000  | 0.220050000  | -3.218670000 |
| 1 | 4.183175000  | -1.266984000 | -4.987305000 |
| 6 | 1.219452000  | 0.455877000  | -0.918695000 |
| 6 | 2.129732000  | 1.301130000  | -0.306416000 |
| 6 | 3.484063000  | 1.217709000  | -0.989900000 |
| 1 | 3.777227000  | 2.236582000  | -1.286322000 |
| 6 | 4.586286000  | 0.626439000  | -0.109374000 |
| 6 | 1.875087000  | 2.208821000  | 0.808717000  |
| 6 | 0.660152000  | 2.910292000  | 0.879171000  |
| 6 | 2.825265000  | 2.445147000  | 1.816430000  |
| 6 | 0.372283000  | 3.749519000  | 1.947080000  |
| 1 | -0.045382000 | 2.828330000  | 0.053297000  |
| 6 | 2.535115000  | 3.281441000  | 2.883704000  |
| 1 | 3.780479000  | 1.929452000  | 1.790233000  |
| 6 | 1.304238000  | 3.926567000  | 2.963593000  |

|    |              |              |              |
|----|--------------|--------------|--------------|
| 1  | -0.574899000 | 4.286405000  | 1.971003000  |
| 1  | 3.276515000  | 3.424708000  | 3.666060000  |
| 6  | 5.904920000  | 1.294190000  | -0.107573000 |
| 6  | 6.729627000  | 1.227968000  | 1.024226000  |
| 6  | 6.371548000  | 2.010617000  | -1.217545000 |
| 6  | 7.980321000  | 1.829625000  | 1.036603000  |
| 1  | 6.368908000  | 0.715656000  | 1.914565000  |
| 6  | 7.625925000  | 2.610268000  | -1.207556000 |
| 1  | 5.756302000  | 2.089126000  | -2.113029000 |
| 6  | 8.436734000  | 2.521668000  | -0.081741000 |
| 1  | 8.597279000  | 1.769782000  | 1.930378000  |
| 1  | 7.968818000  | 3.151759000  | -2.086360000 |
| 1  | 9.414440000  | 2.997441000  | -0.071254000 |
| 79 | -0.914597000 | 0.569434000  | -0.764499000 |
| 15 | -3.247975000 | 0.651948000  | -0.494002000 |
| 6  | -4.043696000 | 2.081657000  | -1.296790000 |
| 6  | -3.661374000 | 0.796591000  | 1.273556000  |
| 6  | -4.106462000 | -0.816666000 | -1.132803000 |
| 6  | -5.095771000 | 2.783925000  | -0.704136000 |
| 6  | -3.584952000 | 2.458225000  | -2.562834000 |
| 6  | -4.699647000 | 0.078258000  | 1.868812000  |
| 6  | -2.879683000 | 1.658825000  | 2.049143000  |
| 6  | -5.464995000 | -0.786973000 | -1.466323000 |
| 6  | -3.379112000 | -2.002354000 | -1.271717000 |
| 6  | -5.685625000 | 3.848911000  | -1.378102000 |
| 1  | -5.449598000 | 2.500042000  | 0.286256000  |
| 6  | -4.180348000 | 3.518934000  | -3.234071000 |
| 1  | -2.753554000 | 1.918327000  | -3.017072000 |
| 6  | -4.953280000 | 0.229256000  | 3.228860000  |
| 1  | -5.300409000 | -0.608167000 | 1.274228000  |
| 6  | -3.145795000 | 1.817054000  | 3.402493000  |
| 1  | -2.042519000 | 2.190396000  | 1.596034000  |
| 6  | -6.090449000 | -1.941762000 | -1.920007000 |
| 1  | -6.029218000 | 0.141240000  | -1.377642000 |
| 6  | -4.011749000 | -3.154988000 | -1.724505000 |
| 1  | -2.315483000 | -2.027567000 | -1.033594000 |
| 6  | -5.229839000 | 4.215261000  | -2.640503000 |
| 1  | -6.502066000 | 4.395724000  | -0.912394000 |
| 1  | -3.818698000 | 3.808877000  | -4.217483000 |
| 6  | -4.180455000 | 1.097264000  | 3.993931000  |
| 1  | -5.755066000 | -0.339448000 | 3.693707000  |
| 1  | -2.521869000 | 2.478275000  | 3.999486000  |
| 6  | -5.364590000 | -3.124425000 | -2.046348000 |
| 1  | -7.145671000 | -1.918485000 | -2.181529000 |



|                                              |              |              |                             |
|----------------------------------------------|--------------|--------------|-----------------------------|
| 1                                            | -3.437722000 | -4.072122000 | -1.828801000                |
| 1                                            | -5.691122000 | 5.050650000  | -3.161942000                |
| 1                                            | -4.377897000 | 1.204654000  | 5.057834000                 |
| 1                                            | -5.857291000 | -4.025086000 | -2.405366000                |
| 8                                            | 0.004118000  | -2.993919000 | -1.216873000                |
| 16                                           | 0.647637000  | -3.163308000 | 0.078098000                 |
| 9                                            | 2.904230000  | -2.776123000 | -1.181078000                |
| 9                                            | 3.116646000  | -3.632808000 | 0.787300000                 |
| 9                                            | 2.381109000  | -4.844735000 | -0.844904000                |
| 6                                            | 2.389860000  | -3.632697000 | -0.315711000                |
| 8                                            | 1.539653000  | -2.261748000 | 3.179839000                 |
| 8                                            | 0.767192000  | 0.046013000  | 2.486169000                 |
| 16                                           | 0.707450000  | -1.401328000 | 2.363730000                 |
| 9                                            | -1.155822000 | -3.054660000 | 3.268471000                 |
| 9                                            | -1.484286000 | -0.974240000 | 3.696074000                 |
| 9                                            | -1.832250000 | -1.730325000 | 1.703758000                 |
| 6                                            | -1.063791000 | -1.837410000 | 2.785852000                 |
| 7                                            | 0.826268000  | -1.685554000 | 0.749362000                 |
| 8                                            | 0.162403000  | -4.153016000 | 1.022680000                 |
| 6                                            | 4.349468000  | -0.485998000 | 0.596062000                 |
| 1                                            | 3.365763000  | -0.950600000 | 0.612343000                 |
| 1                                            | 0.902824000  | -0.500300000 | -0.068726000                |
| 1                                            | 5.130158000  | -0.981270000 | 1.167432000                 |
| 1                                            | 1.082998000  | 4.581362000  | 3.803306000                 |
| Zero-point correction=                       |              |              | 0.664012 (Hartree/Particle) |
| Thermal correction to Energy=                |              |              | 0.715908                    |
| Thermal correction to Enthalpy=              |              |              | 0.716853                    |
| Thermal correction to Gibbs Free Energy=     |              |              | 0.574624                    |
| Sum of electronic and zero-point Energies=   |              |              | -3883.821234                |
| Sum of electronic and thermal Energies=      |              |              | -3883.769337                |
| Sum of electronic and thermal Enthalpies=    |              |              | -3883.768393                |
| Sum of electronic and thermal Free Energies= |              |              | -3883.910621                |

### B-2d

|   |              |              |              |
|---|--------------|--------------|--------------|
| 6 | -2.083000000 | 0.358711000  | -4.714574000 |
| 6 | -0.998344000 | 0.846862000  | -3.987683000 |
| 6 | -1.229836000 | 1.344356000  | -2.708029000 |
| 6 | -2.515682000 | 1.306639000  | -2.143844000 |
| 6 | -3.594108000 | 0.850597000  | -2.880299000 |
| 6 | -3.370262000 | 0.378497000  | -4.176974000 |
| 1 | -1.927514000 | -0.025232000 | -5.720452000 |
| 1 | 0.005048000  | 0.851149000  | -4.409579000 |
| 1 | -4.600237000 | 0.863298000  | -2.460370000 |
| 1 | -4.208671000 | 0.024051000  | -4.773698000 |

|    |              |              |              |
|----|--------------|--------------|--------------|
| 6  | -0.325934000 | 1.951292000  | -1.745124000 |
| 6  | -0.994465000 | 2.262756000  | -0.601962000 |
| 6  | -2.441200000 | 1.809933000  | -0.723512000 |
| 1  | -2.565134000 | 0.940957000  | -0.050390000 |
| 6  | -3.480444000 | 2.856440000  | -0.363133000 |
| 6  | -0.450405000 | 2.888198000  | 0.599563000  |
| 6  | 0.754942000  | 3.603730000  | 0.550680000  |
| 6  | -1.106723000 | 2.775059000  | 1.832731000  |
| 6  | 1.290950000  | 4.176736000  | 1.693801000  |
| 1  | 1.272661000  | 3.712980000  | -0.399224000 |
| 6  | -0.567076000 | 3.347344000  | 2.977805000  |
| 1  | -2.048333000 | 2.229814000  | 1.898295000  |
| 6  | 0.631074000  | 4.050280000  | 2.913823000  |
| 1  | 2.233783000  | 4.715354000  | 1.632288000  |
| 1  | -1.088206000 | 3.243556000  | 3.927025000  |
| 6  | -4.582658000 | 2.460752000  | 0.537076000  |
| 6  | -5.127617000 | 3.382052000  | 1.440947000  |
| 6  | -5.101438000 | 1.159153000  | 0.526722000  |
| 6  | -6.174987000 | 3.025608000  | 2.279998000  |
| 1  | -4.696420000 | 4.379569000  | 1.502075000  |
| 6  | -6.152748000 | 0.804061000  | 1.364195000  |
| 1  | -4.695164000 | 0.412878000  | -0.157408000 |
| 6  | -6.696467000 | 1.735176000  | 2.242321000  |
| 1  | -6.577257000 | 3.755398000  | 2.979229000  |
| 1  | -6.544992000 | -0.211098000 | 1.327118000  |
| 1  | -7.514447000 | 1.455299000  | 2.902054000  |
| 79 | 0.693502000  | -0.362876000 | -0.329058000 |
| 15 | -0.590009000 | -2.237124000 | 0.088393000  |
| 6  | -2.399534000 | -2.233137000 | -0.131610000 |
| 6  | -0.309532000 | -2.634385000 | 1.844099000  |
| 6  | -0.008753000 | -3.668321000 | -0.875750000 |
| 6  | -3.266954000 | -2.482479000 | 0.935130000  |
| 6  | -2.915194000 | -2.020054000 | -1.414442000 |
| 6  | -0.232738000 | -3.950746000 | 2.306998000  |
| 6  | -0.171069000 | -1.571382000 | 2.742665000  |
| 6  | -0.810934000 | -4.801382000 | -1.050770000 |
| 6  | 1.278189000  | -3.639050000 | -1.421394000 |
| 6  | -4.640259000 | -2.532825000 | 0.715576000  |
| 1  | -2.868809000 | -2.644122000 | 1.935213000  |
| 6  | -4.286159000 | -2.092704000 | -1.629479000 |
| 1  | -2.244749000 | -1.799752000 | -2.246998000 |
| 6  | -0.011828000 | -4.197106000 | 3.657579000  |
| 1  | -0.331448000 | -4.782056000 | 1.610471000  |
| 6  | 0.052581000  | -1.824406000 | 4.090560000  |

|                                            |              |              |                             |
|--------------------------------------------|--------------|--------------|-----------------------------|
| 1                                          | -0.207011000 | -0.540802000 | 2.387862000                 |
| 6                                          | -0.323443000 | -5.895621000 | -1.755491000                |
| 1                                          | -1.820065000 | -4.824047000 | -0.640131000                |
| 6                                          | 1.760930000  | -4.737385000 | -2.124524000                |
| 1                                          | 1.899427000  | -2.749926000 | -1.306223000                |
| 6                                          | -5.149303000 | -2.347617000 | -0.565889000                |
| 1                                          | -5.312323000 | -2.724282000 | 1.549156000                 |
| 1                                          | -4.680903000 | -1.940336000 | -2.631182000                |
| 6                                          | 0.133954000  | -3.136247000 | 4.547425000                 |
| 1                                          | 0.056660000  | -5.221946000 | 4.014501000                 |
| 1                                          | 0.182444000  | -0.990885000 | 4.776062000                 |
| 6                                          | 0.961540000  | -5.863306000 | -2.291249000                |
| 1                                          | -0.950275000 | -6.773460000 | -1.892063000                |
| 1                                          | 2.760225000  | -4.705324000 | -2.550761000                |
| 1                                          | -6.222577000 | -2.396656000 | -0.737185000                |
| 1                                          | 0.321342000  | -3.334370000 | 5.600187000                 |
| 1                                          | 1.337655000  | -6.718397000 | -2.847909000                |
| 8                                          | 2.860138000  | 0.298079000  | -2.467433000                |
| 16                                         | 3.580860000  | 0.825649000  | -1.317593000                |
| 9                                          | 2.785207000  | 3.123348000  | -2.297263000                |
| 9                                          | 4.174175000  | 3.307752000  | -0.660170000                |
| 9                                          | 4.869698000  | 2.662250000  | -2.599716000                |
| 6                                          | 3.874264000  | 2.607870000  | -1.733527000                |
| 8                                          | 4.063607000  | 1.859142000  | 1.751383000                 |
| 8                                          | 1.776366000  | 0.917814000  | 2.298110000                 |
| 16                                         | 2.996383000  | 0.910531000  | 1.508454000                 |
| 9                                          | 5.033306000  | -0.776831000 | 1.704873000                 |
| 9                                          | 3.405175000  | -1.140738000 | 3.063874000                 |
| 9                                          | 3.212779000  | -1.690295000 | 0.988456000                 |
| 6                                          | 3.726395000  | -0.794359000 | 1.828045000                 |
| 7                                          | 2.501195000  | 0.879434000  | -0.079133000                |
| 8                                          | 4.877019000  | 0.300394000  | -0.928142000                |
| 6                                          | -3.389685000 | 4.086583000  | -0.877955000                |
| 1                                          | -2.555346000 | 4.362369000  | -1.520659000                |
| 1                                          | 0.725547000  | 2.134641000  | -1.941757000                |
| 1                                          | -4.145130000 | 4.845764000  | -0.692507000                |
| 1                                          | 1.053156000  | 4.494886000  | 3.811834000                 |
| Zero-point correction=                     |              |              | 0.670696 (Hartree/Particle) |
| Thermal correction to Energy=              |              |              | 0.722546                    |
| Thermal correction to Enthalpy=            |              |              | 0.723491                    |
| Thermal correction to Gibbs Free Energy=   |              |              | 0.583573                    |
| Sum of electronic and zero-point Energies= |              |              | -3883.872460                |
| Sum of electronic and thermal Energies=    |              |              | -3883.820609                |
| Sum of electronic and thermal Enthalpies=  |              |              | -3883.819665                |

Sum of electronic and thermal Free Energies= -3883.959582

**B-TSd3**

|   |              |              |              |
|---|--------------|--------------|--------------|
| 6 | -0.191821000 | -2.909526000 | -4.168466000 |
| 6 | -1.454166000 | -2.325536000 | -4.221569000 |
| 6 | -1.889043000 | -1.586594000 | -3.124521000 |
| 6 | -1.067408000 | -1.434080000 | -1.995348000 |
| 6 | 0.182229000  | -2.022716000 | -1.943455000 |
| 6 | 0.618083000  | -2.760538000 | -3.042939000 |
| 1 | 0.167314000  | -3.489768000 | -5.015415000 |
| 1 | -2.085397000 | -2.441332000 | -5.100135000 |
| 1 | 0.801102000  | -1.912068000 | -1.060661000 |
| 1 | 1.602840000  | -3.221760000 | -3.017448000 |
| 6 | -3.121420000 | -0.859353000 | -2.888398000 |
| 6 | -3.104051000 | -0.256432000 | -1.678649000 |
| 6 | -1.788661000 | -0.618821000 | -0.959111000 |
| 1 | -1.233195000 | 0.288263000  | -0.673939000 |
| 6 | -2.222951000 | -1.385725000 | 0.255358000  |
| 6 | -4.144223000 | 0.607844000  | -1.121096000 |
| 6 | -3.815253000 | 1.791309000  | -0.447480000 |
| 6 | -5.493234000 | 0.258008000  | -1.253326000 |
| 6 | -4.815028000 | 2.592788000  | 0.087014000  |
| 1 | -2.770709000 | 2.089101000  | -0.359046000 |
| 6 | -6.490199000 | 1.066254000  | -0.723521000 |
| 1 | -5.749202000 | -0.672430000 | -1.757985000 |
| 6 | -6.153161000 | 2.233884000  | -0.046060000 |
| 1 | -4.545016000 | 3.506265000  | 0.612064000  |
| 1 | -7.533504000 | 0.777720000  | -0.829207000 |
| 6 | -2.739999000 | -0.653721000 | 1.407725000  |
| 6 | -2.095511000 | 0.481065000  | 1.919897000  |
| 6 | -3.960897000 | -1.060084000 | 1.969368000  |
| 6 | -2.649636000 | 1.172481000  | 2.985487000  |
| 1 | -1.149743000 | 0.804273000  | 1.500301000  |
| 6 | -4.536518000 | -0.330679000 | 2.997364000  |
| 1 | -4.487170000 | -1.912985000 | 1.546262000  |
| 6 | -3.874704000 | 0.778792000  | 3.515102000  |
| 1 | -2.126891000 | 2.033395000  | 3.392948000  |
| 1 | -5.500775000 | -0.630637000 | 3.398788000  |
| 1 | -4.318541000 | 1.340221000  | 4.333758000  |
| 6 | -2.199081000 | -2.782426000 | 0.272699000  |
| 1 | -2.123109000 | -3.296773000 | -0.687505000 |
| 1 | -3.921059000 | -0.745258000 | -3.616488000 |
| 1 | -2.797571000 | -3.276545000 | 1.040117000  |
| 1 | -6.931989000 | 2.863091000  | 0.378253000  |

|                                            |              |              |                             |
|--------------------------------------------|--------------|--------------|-----------------------------|
| 16                                         | 1.047269000  | -2.307158000 | 1.810216000                 |
| 8                                          | 1.183667000  | -2.378053000 | 3.256489000                 |
| 8                                          | 0.555817000  | -1.002374000 | 1.267241000                 |
| 8                                          | 0.191321000  | -3.410154000 | 1.224760000                 |
| 1                                          | -1.032273000 | -2.973058000 | 0.736852000                 |
| 6                                          | 2.660663000  | -2.570545000 | 1.109445000                 |
| 6                                          | 3.395932000  | -3.653567000 | 1.586242000                 |
| 6                                          | 4.648925000  | -3.912013000 | 1.055164000                 |
| 6                                          | 5.188488000  | -3.096002000 | 0.055544000                 |
| 6                                          | 4.434600000  | -2.016321000 | -0.401761000                |
| 6                                          | 3.172004000  | -1.742244000 | 0.116241000                 |
| 1                                          | 2.980508000  | -4.279411000 | 2.372580000                 |
| 1                                          | 5.227011000  | -4.759870000 | 1.420297000                 |
| 1                                          | 4.841573000  | -1.373793000 | -1.181633000                |
| 1                                          | 2.601691000  | -0.893157000 | -0.260459000                |
| 6                                          | 6.558054000  | -3.367046000 | -0.488773000                |
| 1                                          | 6.717986000  | -2.861143000 | -1.446332000                |
| 1                                          | 7.334304000  | -3.015333000 | 0.202615000                 |
| 1                                          | 6.725601000  | -4.439508000 | -0.638357000                |
| 16                                         | 1.134872000  | 1.926936000  | -0.095779000                |
| 8                                          | -0.249490000 | 2.390392000  | -0.056109000                |
| 8                                          | 1.496381000  | 0.942239000  | -1.107438000                |
| 8                                          | 1.567651000  | 1.389142000  | 1.331723000                 |
| 1                                          | 1.254770000  | 0.434673000  | 1.430467000                 |
| 6                                          | 2.206875000  | 3.323375000  | -0.205480000                |
| 6                                          | 1.683431000  | 4.606627000  | -0.145536000                |
| 6                                          | 2.551612000  | 5.687565000  | -0.244122000                |
| 6                                          | 3.924743000  | 5.495796000  | -0.397381000                |
| 6                                          | 4.421003000  | 4.188623000  | -0.460565000                |
| 6                                          | 3.571734000  | 3.099221000  | -0.366572000                |
| 1                                          | 0.611863000  | 4.743502000  | -0.028624000                |
| 1                                          | 2.156889000  | 6.701177000  | -0.202512000                |
| 1                                          | 5.490883000  | 4.031294000  | -0.587566000                |
| 1                                          | 3.951967000  | 2.081292000  | -0.418984000                |
| 6                                          | 4.859667000  | 6.663581000  | -0.473105000                |
| 1                                          | 5.632278000  | 6.510606000  | -1.234529000                |
| 1                                          | 4.327657000  | 7.590551000  | -0.708326000                |
| 1                                          | 5.376393000  | 6.813972000  | 0.483021000                 |
| Zero-point correction=                     |              |              | 0.619127 (Hartree/Particle) |
| Thermal correction to Energy=              |              |              | 0.659684                    |
| Thermal correction to Enthalpy=            |              |              | 0.660628                    |
| Thermal correction to Gibbs Free Energy=   |              |              | 0.543361                    |
| Sum of electronic and zero-point Energies= |              |              | -2676.087164                |
| Sum of electronic and thermal Energies=    |              |              | -2676.046606                |

Sum of electronic and thermal Enthalpies= -2676.045662  
 Sum of electronic and thermal Free Energies= -2676.162929

**B-3d**

|   |              |              |              |
|---|--------------|--------------|--------------|
| 6 | 1.385094000  | -3.687469000 | 1.687740000  |
| 6 | 0.342398000  | -2.922530000 | 2.206188000  |
| 6 | 0.087209000  | -1.673203000 | 1.642415000  |
| 6 | 0.854530000  | -1.198235000 | 0.560710000  |
| 6 | 1.880859000  | -1.973066000 | 0.044005000  |
| 6 | 2.146190000  | -3.216949000 | 0.619564000  |
| 1 | 1.598176000  | -4.664854000 | 2.114144000  |
| 1 | -0.264260000 | -3.293244000 | 3.029944000  |
| 1 | 2.468273000  | -1.623491000 | -0.799736000 |
| 1 | 2.949314000  | -3.828940000 | 0.213938000  |
| 6 | -0.949311000 | -0.694131000 | 1.923919000  |
| 6 | -0.853254000 | 0.351306000  | 1.070209000  |
| 6 | 0.348655000  | 0.167338000  | 0.158857000  |
| 1 | 0.031912000  | 0.162397000  | -0.894536000 |
| 6 | 1.433395000  | 1.282991000  | 0.303181000  |
| 6 | -1.820249000 | 1.448305000  | 0.986076000  |
| 6 | -2.260486000 | 1.926617000  | -0.255071000 |
| 6 | -2.376626000 | 1.988823000  | 2.152025000  |
| 6 | -3.210921000 | 2.935165000  | -0.322123000 |
| 1 | -1.875690000 | 1.477831000  | -1.168796000 |
| 6 | -3.333480000 | 2.993756000  | 2.081520000  |
| 1 | -2.023911000 | 1.632624000  | 3.119287000  |
| 6 | -3.748998000 | 3.474268000  | 0.843204000  |
| 1 | -3.537687000 | 3.299651000  | -1.293149000 |
| 1 | -3.745831000 | 3.412198000  | 2.997047000  |
| 6 | 0.901436000  | 2.635724000  | -0.132133000 |
| 6 | 0.757134000  | 2.916073000  | -1.493114000 |
| 6 | 0.484419000  | 3.588176000  | 0.796915000  |
| 6 | 0.196337000  | 4.115819000  | -1.911752000 |
| 1 | 1.101203000  | 2.191216000  | -2.228034000 |
| 6 | -0.091004000 | 4.781970000  | 0.378393000  |
| 1 | 0.583102000  | 3.394440000  | 1.862384000  |
| 6 | -0.239257000 | 5.049211000  | -0.977087000 |
| 1 | 0.100718000  | 4.320885000  | -2.975328000 |
| 1 | -0.428452000 | 5.503219000  | 1.119076000  |
| 1 | -0.684632000 | 5.985548000  | -1.305025000 |
| 6 | 2.029393000  | 1.272926000  | 1.701813000  |
| 1 | 2.547860000  | 0.325016000  | 1.878233000  |
| 1 | -1.741617000 | -0.833013000 | 2.656626000  |
| 1 | 1.227957000  | 1.349990000  | 2.444574000  |

|                                            |              |              |                             |
|--------------------------------------------|--------------|--------------|-----------------------------|
| 1                                          | -4.490658000 | 4.267499000  | 0.785928000                 |
| 16                                         | 3.879191000  | 1.462831000  | -0.928573000                |
| 8                                          | 3.992235000  | 1.649378000  | -2.359681000                |
| 8                                          | 2.404576000  | 0.827634000  | -0.693369000                |
| 8                                          | 4.118088000  | 2.552743000  | -0.001821000                |
| 1                                          | 2.728461000  | 2.099992000  | 1.843170000                 |
| 6                                          | 4.856337000  | 0.062277000  | -0.459687000                |
| 6                                          | 5.326342000  | -0.041586000 | 0.843881000                 |
| 6                                          | 5.988466000  | -1.199334000 | 1.227740000                 |
| 6                                          | 6.180531000  | -2.251782000 | 0.329550000                 |
| 6                                          | 5.716091000  | -2.109518000 | -0.981107000                |
| 6                                          | 5.055149000  | -0.957855000 | -1.384391000                |
| 1                                          | 5.177685000  | 0.780382000  | 1.539842000                 |
| 1                                          | 6.365806000  | -1.292499000 | 2.244692000                 |
| 1                                          | 5.880087000  | -2.914452000 | -1.695722000                |
| 1                                          | 4.693406000  | -0.839477000 | -2.403191000                |
| 6                                          | 6.846467000  | -3.519019000 | 0.769902000                 |
| 1                                          | 7.352131000  | -4.019593000 | -0.062084000                |
| 1                                          | 7.584067000  | -3.335401000 | 1.557851000                 |
| 1                                          | 6.109439000  | -4.224953000 | 1.174497000                 |
| 16                                         | -2.666572000 | -2.422178000 | -1.401417000                |
| 8                                          | -2.884497000 | -3.345746000 | -2.493084000                |
| 8                                          | -1.796794000 | -1.265376000 | -1.563891000                |
| 8                                          | -2.089964000 | -3.253794000 | -0.142190000                |
| 1                                          | -1.232161000 | -2.863054000 | 0.114399000                 |
| 6                                          | -4.235607000 | -1.894272000 | -0.783354000                |
| 6                                          | -5.397947000 | -2.431709000 | -1.318804000                |
| 6                                          | -6.623567000 | -1.970047000 | -0.852917000                |
| 6                                          | -6.696480000 | -0.983167000 | 0.130875000                 |
| 6                                          | -5.506977000 | -0.458517000 | 0.648863000                 |
| 6                                          | -4.277184000 | -0.910215000 | 0.200989000                 |
| 1                                          | -5.332032000 | -3.190726000 | -2.093499000                |
| 1                                          | -7.544360000 | -2.378495000 | -1.265755000                |
| 1                                          | -5.543438000 | 0.323732000  | 1.406761000                 |
| 1                                          | -3.355593000 | -0.491768000 | 0.597394000                 |
| 6                                          | -8.019268000 | -0.497368000 | 0.638545000                 |
| 1                                          | -8.039955000 | 0.595367000  | 0.715223000                 |
| 1                                          | -8.841508000 | -0.809408000 | -0.012698000                |
| 1                                          | -8.223747000 | -0.892422000 | 1.641454000                 |
| Zero-point correction=                     |              |              | 0.627667 (Hartree/Particle) |
| Thermal correction to Energy=              |              |              | 0.667879                    |
| Thermal correction to Enthalpy=            |              |              | 0.668823                    |
| Thermal correction to Gibbs Free Energy=   |              |              | 0.554762                    |
| Sum of electronic and zero-point Energies= |              |              | -2676.114575                |

|                                              |              |
|----------------------------------------------|--------------|
| Sum of electronic and thermal Energies=      | -2676.074363 |
| Sum of electronic and thermal Enthalpies=    | -2676.073419 |
| Sum of electronic and thermal Free Energies= | -2676.187480 |

**B-TSd4**

|   |              |              |              |
|---|--------------|--------------|--------------|
| 6 | 4.442677000  | 2.507852000  | 3.370984000  |
| 6 | 5.085283000  | 1.709829000  | 2.430452000  |
| 6 | 4.340905000  | 0.759115000  | 1.741309000  |
| 6 | 2.965868000  | 0.589278000  | 1.991477000  |
| 6 | 2.322701000  | 1.421127000  | 2.902238000  |
| 6 | 3.074647000  | 2.369385000  | 3.596271000  |
| 1 | 5.007183000  | 3.256283000  | 3.922383000  |
| 1 | 6.147547000  | 1.830683000  | 2.227451000  |
| 1 | 1.248902000  | 1.371142000  | 3.050480000  |
| 1 | 2.579452000  | 3.014779000  | 4.317786000  |
| 6 | 4.734927000  | -0.157805000 | 0.692484000  |
| 6 | 3.685931000  | -0.890419000 | 0.266328000  |
| 6 | 2.447580000  | -0.444689000 | 1.037857000  |
| 1 | 1.896713000  | 0.275686000  | 0.187932000  |
| 6 | 1.359893000  | -1.328260000 | 1.337237000  |
| 6 | 3.776423000  | -1.892596000 | -0.811250000 |
| 6 | 3.901539000  | -1.462234000 | -2.135659000 |
| 6 | 3.779427000  | -3.264163000 | -0.541433000 |
| 6 | 4.000688000  | -2.384195000 | -3.170795000 |
| 1 | 3.891531000  | -0.392940000 | -2.341214000 |
| 6 | 3.876225000  | -4.185114000 | -1.576308000 |
| 1 | 3.696045000  | -3.605118000 | 0.489447000  |
| 6 | 3.981541000  | -3.747413000 | -2.893633000 |
| 1 | 4.089131000  | -2.036742000 | -4.197477000 |
| 1 | 3.870740000  | -5.249730000 | -1.353946000 |
| 6 | 0.878435000  | -2.286661000 | 0.368300000  |
| 6 | 0.875153000  | -2.000100000 | -1.012845000 |
| 6 | 0.395098000  | -3.538399000 | 0.800825000  |
| 6 | 0.423408000  | -2.942484000 | -1.918422000 |
| 1 | 1.159959000  | -1.011778000 | -1.362303000 |
| 6 | -0.010194000 | -4.489216000 | -0.117414000 |
| 1 | 0.384855000  | -3.782689000 | 1.859315000  |
| 6 | -0.002117000 | -4.190384000 | -1.477210000 |
| 1 | 0.394889000  | -2.694851000 | -2.975415000 |
| 1 | -0.362923000 | -5.455918000 | 0.230132000  |
| 1 | -0.354634000 | -4.927394000 | -2.194270000 |
| 6 | 0.603010000  | -1.178572000 | 2.592549000  |
| 1 | 1.235486000  | -0.922487000 | 3.447011000  |
| 1 | 5.742689000  | -0.252174000 | 0.297217000  |



|                                          |              |              |                             |
|------------------------------------------|--------------|--------------|-----------------------------|
| 1                                        | -0.050075000 | -2.028514000 | 2.800786000                 |
| 1                                        | 4.053960000  | -4.470085000 | -3.703005000                |
| 16                                       | -2.877403000 | -1.965130000 | 0.235602000                 |
| 8                                        | -2.584921000 | -2.220626000 | -1.164755000                |
| 8                                        | -1.921503000 | -0.803325000 | 0.756373000                 |
| 8                                        | -2.795311000 | -3.024897000 | 1.223656000                 |
| 1                                        | -0.083188000 | -0.331709000 | 2.407522000                 |
| 6                                        | -4.473596000 | -1.206630000 | 0.343042000                 |
| 6                                        | -5.396350000 | -1.660116000 | 1.273475000                 |
| 6                                        | -6.640820000 | -1.043016000 | 1.340049000                 |
| 6                                        | -6.962414000 | 0.019248000  | 0.496434000                 |
| 6                                        | -6.010291000 | 0.453904000  | -0.433151000                |
| 6                                        | -4.768088000 | -0.152241000 | -0.518449000                |
| 1                                        | -5.132689000 | -2.486572000 | 1.928071000                 |
| 1                                        | -7.377336000 | -1.391678000 | 2.062147000                 |
| 1                                        | -6.254986000 | 1.281478000  | -1.097423000                |
| 1                                        | -4.025997000 | 0.184021000  | -1.240676000                |
| 6                                        | -8.293209000 | 0.701741000  | 0.587160000                 |
| 1                                        | -8.193348000 | 1.702324000  | 1.026014000                 |
| 1                                        | -8.745010000 | 0.830997000  | -0.402938000                |
| 1                                        | -8.994040000 | 0.136395000  | 1.209165000                 |
| 16                                       | 0.002030000  | 1.646577000  | -0.391165000                |
| 8                                        | 1.381741000  | 1.176634000  | -0.810580000                |
| 8                                        | -0.151619000 | 1.604663000  | 1.069318000                 |
| 8                                        | -1.070179000 | 0.929105000  | -1.124477000                |
| 1                                        | -1.676789000 | -0.176758000 | 0.016065000                 |
| 6                                        | -0.044546000 | 3.339150000  | -0.902901000                |
| 6                                        | 0.725345000  | 4.257576000  | -0.192309000                |
| 6                                        | 0.727664000  | 5.583178000  | -0.592399000                |
| 6                                        | -0.026104000 | 6.005341000  | -1.693909000                |
| 6                                        | -0.787438000 | 5.064143000  | -2.384905000                |
| 6                                        | -0.801641000 | 3.728276000  | -1.997287000                |
| 1                                        | 1.306692000  | 3.925560000  | 0.666419000                 |
| 1                                        | 1.321911000  | 6.312878000  | -0.043821000                |
| 1                                        | -1.379825000 | 5.383275000  | -3.241054000                |
| 1                                        | -1.393591000 | 2.987202000  | -2.527674000                |
| 6                                        | -0.002626000 | 7.443340000  | -2.114974000                |
| 1                                        | -0.263144000 | 8.106568000  | -1.281743000                |
| 1                                        | 0.996271000  | 7.739867000  | -2.457688000                |
| 1                                        | -0.705687000 | 7.635738000  | -2.931286000                |
| Zero-point correction=                   |              |              | 0.620484 (Hartree/Particle) |
| Thermal correction to Energy=            |              |              | 0.660771                    |
| Thermal correction to Enthalpy=          |              |              | 0.661715                    |
| Thermal correction to Gibbs Free Energy= |              |              | 0.546240                    |

|                                              |              |
|----------------------------------------------|--------------|
| Sum of electronic and zero-point Energies=   | -2676.078962 |
| Sum of electronic and thermal Energies=      | -2676.038675 |
| Sum of electronic and thermal Enthalpies=    | -2676.037731 |
| Sum of electronic and thermal Free Energies= | -2676.153206 |

**B-4d**

|    |              |              |              |
|----|--------------|--------------|--------------|
| 6  | -0.722833000 | -2.032104000 | 3.847383000  |
| 6  | -0.050285000 | -0.815912000 | 3.890877000  |
| 6  | 0.928080000  | -0.560884000 | 2.937797000  |
| 6  | 1.257872000  | -1.511641000 | 1.943780000  |
| 6  | 0.536038000  | -2.701523000 | 1.878846000  |
| 6  | -0.435398000 | -2.957238000 | 2.844929000  |
| 1  | -1.486433000 | -2.257510000 | 4.588681000  |
| 1  | -0.290424000 | -0.071279000 | 4.647728000  |
| 1  | 0.696715000  | -3.424607000 | 1.084460000  |
| 1  | -0.979742000 | -3.899757000 | 2.813332000  |
| 6  | 1.736589000  | 0.618882000  | 2.712306000  |
| 6  | 2.534059000  | 0.438881000  | 1.614401000  |
| 6  | 2.278024000  | -0.915187000 | 1.065817000  |
| 1  | 0.581525000  | 1.564488000  | 1.235243000  |
| 6  | 2.880441000  | -1.510990000 | -0.010552000 |
| 6  | 3.586833000  | -0.726472000 | -1.036555000 |
| 6  | 3.016609000  | 0.455231000  | -1.526761000 |
| 6  | 4.828662000  | -1.129342000 | -1.545530000 |
| 6  | 3.688353000  | 1.234870000  | -2.457126000 |
| 1  | 2.033536000  | 0.756697000  | -1.168164000 |
| 6  | 5.503035000  | -0.345983000 | -2.471002000 |
| 1  | 5.294119000  | -2.041028000 | -1.175289000 |
| 6  | 4.937590000  | 0.841808000  | -2.925232000 |
| 1  | 3.232798000  | 2.154491000  | -2.816051000 |
| 1  | 6.477102000  | -0.661822000 | -2.837141000 |
| 1  | 5.466636000  | 1.454565000  | -3.651202000 |
| 6  | 2.825119000  | -2.990479000 | -0.227397000 |
| 1  | 2.781469000  | -3.543818000 | 0.714644000  |
| 1  | 1.792781000  | 1.477283000  | 3.378246000  |
| 1  | 3.696198000  | -3.331877000 | -0.794712000 |
| 16 | -1.073101000 | -2.833552000 | -1.931630000 |
| 8  | -1.263360000 | -2.499237000 | -3.331008000 |
| 8  | 0.088643000  | -1.908072000 | -1.322731000 |
| 8  | -0.715683000 | -4.173638000 | -1.511084000 |
| 1  | 1.942318000  | -3.256812000 | -0.824511000 |
| 6  | -2.496640000 | -2.286075000 | -1.035531000 |
| 6  | -3.271966000 | -1.257874000 | -1.560920000 |
| 6  | -4.308055000 | -0.742157000 | -0.794689000 |

|                                 |              |              |                             |
|---------------------------------|--------------|--------------|-----------------------------|
| 6                               | -4.581310000 | -1.248705000 | 0.478540000                 |
| 6                               | -3.797094000 | -2.294567000 | 0.970529000                 |
| 6                               | -2.751098000 | -2.814462000 | 0.223665000                 |
| 1                               | -3.046252000 | -0.863455000 | -2.549300000                |
| 1                               | -4.910315000 | 0.079541000  | -1.183445000                |
| 1                               | -3.997146000 | -2.691505000 | 1.965022000                 |
| 1                               | -2.123391000 | -3.614193000 | 0.607620000                 |
| 6                               | -5.707118000 | -0.689932000 | 1.293964000                 |
| 1                               | -5.486939000 | -0.737910000 | 2.365961000                 |
| 1                               | -5.908404000 | 0.355099000  | 1.031003000                 |
| 1                               | -6.635441000 | -1.251304000 | 1.128236000                 |
| 16                              | -1.075993000 | 1.094558000  | -0.025630000                |
| 8                               | -0.039820000 | 2.097932000  | 0.670957000                 |
| 8                               | -1.397936000 | 0.042493000  | 0.914495000                 |
| 8                               | -0.551241000 | 0.744145000  | -1.349993000                |
| 1                               | -0.085055000 | -0.958233000 | -1.520572000                |
| 6                               | -2.466297000 | 2.146809000  | -0.264767000                |
| 6                               | -3.363469000 | 2.308109000  | 0.787533000                 |
| 6                               | -4.500066000 | 3.073734000  | 0.581786000                 |
| 6                               | -4.753126000 | 3.670374000  | -0.658925000                |
| 6                               | -3.838665000 | 3.479530000  | -1.696399000                |
| 6                               | -2.691367000 | 2.718739000  | -1.510249000                |
| 1                               | -3.181719000 | 1.810500000  | 1.737738000                 |
| 1                               | -5.215901000 | 3.205827000  | 1.391926000                 |
| 1                               | -4.033616000 | 3.929153000  | -2.668202000                |
| 1                               | -1.984772000 | 2.548081000  | -2.318080000                |
| 6                               | -5.978478000 | 4.507584000  | -0.858970000                |
| 1                               | -6.199358000 | 4.652143000  | -1.920790000                |
| 1                               | -6.855726000 | 4.053838000  | -0.385274000                |
| 1                               | -5.850074000 | 5.500775000  | -0.411011000                |
| 6                               | 3.595854000  | 1.395014000  | 1.246586000                 |
| 6                               | 3.294716000  | 2.744552000  | 1.038441000                 |
| 6                               | 4.931298000  | 0.988377000  | 1.149675000                 |
| 6                               | 4.293418000  | 3.654341000  | 0.710590000                 |
| 1                               | 2.260811000  | 3.081082000  | 1.098514000                 |
| 6                               | 5.926677000  | 1.895150000  | 0.816022000                 |
| 1                               | 5.184378000  | -0.053502000 | 1.335176000                 |
| 6                               | 5.611611000  | 3.232013000  | 0.588719000                 |
| 1                               | 4.035683000  | 4.697252000  | 0.540202000                 |
| 1                               | 6.957460000  | 1.556874000  | 0.738235000                 |
| 1                               | 6.392168000  | 3.941017000  | 0.323371000                 |
| Zero-point correction=          |              |              | 0.625147 (Hartree/Particle) |
| Thermal correction to Energy=   |              |              | 0.666208                    |
| Thermal correction to Enthalpy= |              |              | 0.667153                    |

|                                              |              |
|----------------------------------------------|--------------|
| Thermal correction to Gibbs Free Energy=     | 0.551172     |
| Sum of electronic and zero-point Energies=   | -2676.114492 |
| Sum of electronic and thermal Energies=      | -2676.073430 |
| Sum of electronic and thermal Enthalpies=    | -2676.072486 |
| Sum of electronic and thermal Free Energies= | -2676.188467 |

### B-TSd5

|   |              |              |              |
|---|--------------|--------------|--------------|
| 6 | -0.478986000 | -1.141260000 | 4.338645000  |
| 6 | 0.110820000  | 0.074380000  | 4.015137000  |
| 6 | 1.040771000  | 0.108840000  | 2.987660000  |
| 6 | 1.397101000  | -1.054264000 | 2.276095000  |
| 6 | 0.754985000  | -2.258642000 | 2.571141000  |
| 6 | -0.165922000 | -2.291264000 | 3.613850000  |
| 1 | -1.202976000 | -1.194202000 | 5.148350000  |
| 1 | -0.164471000 | 0.986328000  | 4.540670000  |
| 1 | 0.930643000  | -3.163319000 | 1.997735000  |
| 1 | -0.653456000 | -3.232266000 | 3.859071000  |
| 6 | 1.722281000  | 1.257909000  | 2.375011000  |
| 6 | 2.605539000  | 0.742479000  | 1.391684000  |
| 6 | 2.350946000  | -0.664700000 | 1.223781000  |
| 1 | 0.861839000  | 1.741762000  | 1.516513000  |
| 6 | 2.889316000  | -1.484021000 | 0.238237000  |
| 6 | 3.639110000  | 1.582956000  | 0.786247000  |
| 6 | 4.968293000  | 1.149678000  | 0.710769000  |
| 6 | 3.313249000  | 2.868365000  | 0.335694000  |
| 6 | 5.946844000  | 1.978917000  | 0.182765000  |
| 1 | 5.230767000  | 0.161690000  | 1.083613000  |
| 6 | 4.294408000  | 3.686141000  | -0.208036000 |
| 1 | 2.275970000  | 3.197100000  | 0.366973000  |
| 6 | 5.611621000  | 3.245407000  | -0.286645000 |
| 1 | 6.976995000  | 1.634347000  | 0.137212000  |
| 1 | 4.026541000  | 4.673303000  | -0.576553000 |
| 6 | 3.402855000  | -0.946866000 | -1.019331000 |
| 6 | 2.730891000  | 0.105909000  | -1.662141000 |
| 6 | 4.559259000  | -1.474687000 | -1.616479000 |
| 6 | 3.223833000  | 0.633515000  | -2.845307000 |
| 1 | 1.801406000  | 0.490540000  | -1.244634000 |
| 6 | 5.058015000  | -0.930755000 | -2.789022000 |
| 1 | 5.102369000  | -2.281134000 | -1.128167000 |
| 6 | 4.390529000  | 0.124470000  | -3.406296000 |
| 1 | 2.685475000  | 1.440270000  | -3.335274000 |
| 1 | 5.970085000  | -1.330374000 | -3.224973000 |
| 1 | 4.776024000  | 0.541214000  | -4.333741000 |
| 6 | 2.895445000  | -2.959858000 | 0.405191000  |

|                               |              |              |                             |
|-------------------------------|--------------|--------------|-----------------------------|
| 1                             | 3.021096000  | -3.258640000 | 1.449694000                 |
| 1                             | 1.997918000  | 2.147180000  | 2.944569000                 |
| 1                             | 3.662951000  | -3.433879000 | -0.211634000                |
| 1                             | 6.378023000  | 3.890528000  | -0.709139000                |
| 16                            | -0.739180000 | -3.068310000 | -1.219000000                |
| 8                             | -0.698172000 | -3.239340000 | -2.660094000                |
| 8                             | 0.158671000  | -1.830385000 | -0.774914000                |
| 8                             | -0.301071000 | -4.146472000 | -0.345399000                |
| 1                             | 1.930032000  | -3.361343000 | 0.054333000                 |
| 6                             | -2.365838000 | -2.531864000 | -0.771847000                |
| 6                             | -3.334875000 | -2.380327000 | -1.757386000                |
| 6                             | -4.595826000 | -1.923226000 | -1.391704000                |
| 6                             | -4.888017000 | -1.608769000 | -0.062375000                |
| 6                             | -3.895013000 | -1.780496000 | 0.906068000                 |
| 6                             | -2.634940000 | -2.241517000 | 0.562135000                 |
| 1                             | -3.091375000 | -2.616520000 | -2.789722000                |
| 1                             | -5.366404000 | -1.798511000 | -2.151424000                |
| 1                             | -4.105962000 | -1.522249000 | 1.942503000                 |
| 1                             | -1.852718000 | -2.342849000 | 1.310838000                 |
| 6                             | -6.221014000 | -1.043432000 | 0.320600000                 |
| 1                             | -6.602965000 | -1.498619000 | 1.241102000                 |
| 1                             | -6.138443000 | 0.036099000  | 0.506690000                 |
| 1                             | -6.966190000 | -1.189449000 | -0.468215000                |
| 16                            | -1.017959000 | 1.271307000  | 0.128364000                 |
| 8                             | 0.015333000  | 2.282369000  | 0.610866000                 |
| 8                             | -1.374081000 | 0.318185000  | 1.175035000                 |
| 8                             | -0.593917000 | 0.653728000  | -1.156301000                |
| 1                             | -0.212703000 | -0.939479000 | -1.045253000                |
| 6                             | -2.453386000 | 2.230648000  | -0.265175000                |
| 6                             | -2.565778000 | 3.568863000  | 0.076704000                 |
| 6                             | -3.747978000 | 4.242596000  | -0.217679000                |
| 6                             | -4.812411000 | 3.593555000  | -0.840544000                |
| 6                             | -4.671739000 | 2.240017000  | -1.170771000                |
| 6                             | -3.501615000 | 1.555638000  | -0.889253000                |
| 1                             | -1.733238000 | 4.070891000  | 0.561515000                 |
| 1                             | -3.845840000 | 5.295735000  | 0.041183000                 |
| 1                             | -5.492926000 | 1.721148000  | -1.666768000                |
| 1                             | -3.393815000 | 0.504443000  | -1.155319000                |
| 6                             | -6.084060000 | 4.318698000  | -1.160524000                |
| 1                             | -6.945784000 | 3.842593000  | -0.677372000                |
| 1                             | -6.048357000 | 5.361364000  | -0.830125000                |
| 1                             | -6.282667000 | 4.315467000  | -2.239046000                |
| Zero-point correction=        |              |              | 0.620362 (Hartree/Particle) |
| Thermal correction to Energy= |              |              | 0.660592                    |

|                                              |              |
|----------------------------------------------|--------------|
| Thermal correction to Enthalpy=              | 0.661536     |
| Thermal correction to Gibbs Free Energy=     | 0.547160     |
| Sum of electronic and zero-point Energies=   | -2676.096644 |
| Sum of electronic and thermal Energies=      | -2676.056414 |
| Sum of electronic and thermal Enthalpies=    | -2676.055470 |
| Sum of electronic and thermal Free Energies= | -2676.169846 |

### B-5d

|    |              |              |              |
|----|--------------|--------------|--------------|
| 6  | -0.290024000 | 4.164971000  | 2.762825000  |
| 6  | -0.370780000 | 2.840720000  | 3.184193000  |
| 6  | -1.106646000 | 1.945033000  | 2.428376000  |
| 6  | -1.756020000 | 2.332220000  | 1.244588000  |
| 6  | -1.645625000 | 3.656363000  | 0.815094000  |
| 6  | -0.921374000 | 4.561072000  | 1.587004000  |
| 1  | 0.269252000  | 4.889823000  | 3.349525000  |
| 1  | 0.129747000  | 2.512782000  | 4.092973000  |
| 1  | -2.077572000 | 4.006237000  | -0.112925000 |
| 1  | -0.844341000 | 5.592822000  | 1.253276000  |
| 6  | -1.340918000 | 0.496512000  | 2.676881000  |
| 6  | -2.287770000 | 0.091828000  | 1.610464000  |
| 6  | -2.445704000 | 1.140747000  | 0.689316000  |
| 1  | -0.418600000 | -0.086956000 | 2.479121000  |
| 6  | -3.097861000 | 1.047454000  | -0.562816000 |
| 6  | -3.329356000 | -0.217953000 | -1.226818000 |
| 6  | -2.387677000 | -1.254712000 | -1.121982000 |
| 6  | -4.491733000 | -0.434812000 | -1.992515000 |
| 6  | -2.598702000 | -2.475777000 | -1.733757000 |
| 1  | -1.464908000 | -1.081795000 | -0.583582000 |
| 6  | -4.717124000 | -1.667633000 | -2.578841000 |
| 1  | -5.245617000 | 0.344681000  | -2.074933000 |
| 6  | -3.770835000 | -2.686657000 | -2.454675000 |
| 1  | -1.832600000 | -3.241327000 | -1.635965000 |
| 1  | -5.631528000 | -1.839610000 | -3.140427000 |
| 1  | -3.947624000 | -3.646222000 | -2.934904000 |
| 6  | -3.472657000 | 2.281476000  | -1.283905000 |
| 1  | -3.891901000 | 3.046015000  | -0.622830000 |
| 1  | -1.693708000 | 0.232650000  | 3.681467000  |
| 1  | -4.141701000 | 2.089808000  | -2.124303000 |
| 16 | 0.432934000  | 2.176474000  | -2.329349000 |
| 8  | 0.906220000  | 1.899074000  | -3.673019000 |
| 8  | -0.490301000 | 0.984757000  | -1.825405000 |
| 8  | -0.346676000 | 3.379949000  | -2.062846000 |
| 1  | -2.536002000 | 2.688513000  | -1.712651000 |
| 6  | 1.811274000  | 2.098423000  | -1.223547000 |

|                        |              |              |                             |
|------------------------|--------------|--------------|-----------------------------|
| 6                      | 2.836652000  | 1.196515000  | -1.496695000                |
| 6                      | 3.862883000  | 1.054127000  | -0.577122000                |
| 6                      | 3.881855000  | 1.803201000  | 0.603198000                 |
| 6                      | 2.846287000  | 2.705428000  | 0.844264000                 |
| 6                      | 1.804030000  | 2.856130000  | -0.061428000                |
| 1                      | 2.808987000  | 0.596028000  | -2.402561000                |
| 1                      | 4.657706000  | 0.331765000  | -0.762425000                |
| 1                      | 2.853503000  | 3.295339000  | 1.759945000                 |
| 1                      | 0.987203000  | 3.549092000  | 0.125965000                 |
| 6                      | 5.003793000  | 1.631141000  | 1.580212000                 |
| 1                      | 4.790162000  | 2.125252000  | 2.533571000                 |
| 1                      | 5.188609000  | 0.567193000  | 1.775599000                 |
| 1                      | 5.939478000  | 2.051303000  | 1.190323000                 |
| 16                     | 0.983997000  | -1.665319000 | -0.180019000                |
| 8                      | 0.240177000  | -2.899948000 | 0.126268000                 |
| 8                      | 0.714793000  | -0.557292000 | 0.765784000                 |
| 8                      | 0.811431000  | -1.232778000 | -1.605844000                |
| 1                      | 0.030065000  | 0.109483000  | -1.783724000                |
| 6                      | 2.719981000  | -2.041650000 | -0.044009000                |
| 6                      | 3.369523000  | -1.868153000 | 1.171616000                 |
| 6                      | 4.716484000  | -2.194512000 | 1.278976000                 |
| 6                      | 5.427785000  | -2.689155000 | 0.183421000                 |
| 6                      | 4.754178000  | -2.846985000 | -1.031269000                |
| 6                      | 3.407206000  | -2.532365000 | -1.149113000                |
| 1                      | 2.820567000  | -1.450102000 | 2.012450000                 |
| 1                      | 5.231589000  | -2.059360000 | 2.230280000                 |
| 1                      | 5.299813000  | -3.219153000 | -1.897715000                |
| 1                      | 2.885381000  | -2.636601000 | -2.097176000                |
| 6                      | 6.874119000  | -3.062774000 | 0.307914000                 |
| 1                      | 7.434390000  | -2.811344000 | -0.599424000                |
| 1                      | 7.350873000  | -2.554580000 | 1.152728000                 |
| 1                      | 6.991907000  | -4.142048000 | 0.468527000                 |
| 6                      | -2.968831000 | -1.189443000 | 1.718284000                 |
| 6                      | -2.227208000 | -2.332686000 | 2.048105000                 |
| 6                      | -4.356571000 | -1.290788000 | 1.545648000                 |
| 6                      | -2.863366000 | -3.561422000 | 2.151426000                 |
| 1                      | -1.142112000 | -2.273471000 | 2.111660000                 |
| 6                      | -4.986836000 | -2.516834000 | 1.681888000                 |
| 1                      | -4.935595000 | -0.397849000 | 1.318137000                 |
| 6                      | -4.240434000 | -3.655821000 | 1.977029000                 |
| 1                      | -2.273714000 | -4.450111000 | 2.359118000                 |
| 1                      | -6.064561000 | -2.586585000 | 1.558605000                 |
| 1                      | -4.735181000 | -4.619639000 | 2.069272000                 |
| Zero-point correction= |              |              | 0.625716 (Hartree/Particle) |

|                                              |              |
|----------------------------------------------|--------------|
| Thermal correction to Energy=                | 0.665986     |
| Thermal correction to Enthalpy=              | 0.666930     |
| Thermal correction to Gibbs Free Energy=     | 0.554369     |
| Sum of electronic and zero-point Energies=   | -2676.106835 |
| Sum of electronic and thermal Energies=      | -2676.066565 |
| Sum of electronic and thermal Enthalpies=    | -2676.065621 |
| Sum of electronic and thermal Free Energies= | -2676.178182 |

### B-TSd6

|    |              |              |              |
|----|--------------|--------------|--------------|
| 6  | 0.466317000  | -4.104778000 | 1.946161000  |
| 6  | -0.472703000 | -4.109886000 | 0.918864000  |
| 6  | -1.263912000 | -2.987051000 | 0.735458000  |
| 6  | -1.088273000 | -1.853275000 | 1.542177000  |
| 6  | -0.126613000 | -1.837758000 | 2.552156000  |
| 6  | 0.636121000  | -2.978826000 | 2.756313000  |
| 1  | 1.078809000  | -4.986549000 | 2.119007000  |
| 1  | -0.585725000 | -4.979750000 | 0.275609000  |
| 1  | 0.034609000  | -0.950993000 | 3.159119000  |
| 1  | 1.382091000  | -2.993087000 | 3.547129000  |
| 6  | -2.851072000 | -1.375823000 | 0.042745000  |
| 6  | -1.939245000 | -0.803904000 | 1.011473000  |
| 6  | -1.828910000 | 0.577797000  | 1.065165000  |
| 6  | -2.407940000 | 1.149430000  | -0.103653000 |
| 6  | -3.033832000 | 2.412049000  | -0.144923000 |
| 6  | -2.499989000 | 0.264671000  | -1.234984000 |
| 6  | -3.898706000 | 2.690318000  | -1.173314000 |
| 1  | -2.887671000 | 3.115886000  | 0.670488000  |
| 6  | -3.394434000 | 0.597917000  | -2.284503000 |
| 1  | -1.613329000 | -0.331685000 | -1.508039000 |
| 6  | -4.103749000 | 1.768567000  | -2.231359000 |
| 1  | -4.447094000 | 3.628784000  | -1.175589000 |
| 1  | -3.469728000 | -0.057562000 | -3.148620000 |
| 1  | -4.780185000 | 2.035697000  | -3.039418000 |
| 6  | -1.126507000 | 1.339906000  | 2.124537000  |
| 1  | -1.475495000 | 1.068905000  | 3.127727000  |
| 1  | -0.058465000 | 1.084322000  | 2.050029000  |
| 1  | -1.199781000 | 2.422864000  | 1.986409000  |
| 16 | 0.952598000  | 3.799370000  | 0.027612000  |
| 8  | 1.568113000  | 4.621110000  | -0.998198000 |
| 8  | -0.040645000 | 2.754624000  | -0.646944000 |
| 8  | 0.174565000  | 4.404950000  | 1.097822000  |
| 6  | 2.208209000  | 2.767672000  | 0.735446000  |
| 6  | 3.154561000  | 2.188987000  | -0.103425000 |
| 6  | 4.070363000  | 1.296336000  | 0.430830000  |



|    |              |              |              |
|----|--------------|--------------|--------------|
| 6  | 4.058615000  | 0.980111000  | 1.791090000  |
| 6  | 3.126215000  | 1.608484000  | 2.618593000  |
| 6  | 2.196587000  | 2.499866000  | 2.098383000  |
| 1  | 3.151291000  | 2.413067000  | -1.167545000 |
| 1  | 4.799916000  | 0.818058000  | -0.222386000 |
| 1  | 3.128398000  | 1.390644000  | 3.686007000  |
| 1  | 1.467613000  | 2.995022000  | 2.735429000  |
| 6  | 5.001463000  | -0.048348000 | 2.335115000  |
| 1  | 5.207251000  | 0.107286000  | 3.399531000  |
| 1  | 4.572317000  | -1.053388000 | 2.221820000  |
| 1  | 5.954387000  | -0.047994000 | 1.794379000  |
| 16 | 1.020838000  | -0.398759000 | -1.210106000 |
| 8  | 0.043115000  | -1.398807000 | -1.710271000 |
| 8  | 0.866854000  | -0.096510000 | 0.222249000  |
| 8  | 1.054408000  | 0.828541000  | -2.062313000 |
| 1  | 0.420761000  | 2.096285000  | -1.256090000 |
| 6  | 2.628695000  | -1.140840000 | -1.371615000 |
| 6  | 3.042678000  | -2.037210000 | -0.388872000 |
| 6  | 4.299418000  | -2.614730000 | -0.484449000 |
| 6  | 5.154596000  | -2.309814000 | -1.549738000 |
| 6  | 4.714003000  | -1.413538000 | -2.523135000 |
| 6  | 3.454205000  | -0.826959000 | -2.441055000 |
| 1  | 2.381558000  | -2.253506000 | 0.450331000  |
| 1  | 4.636279000  | -3.313073000 | 0.282274000  |
| 1  | 5.371261000  | -1.167376000 | -3.356080000 |
| 1  | 3.110109000  | -0.111795000 | -3.184522000 |
| 6  | 6.513046000  | -2.938927000 | -1.630912000 |
| 1  | 7.068348000  | -2.587119000 | -2.506023000 |
| 1  | 7.112312000  | -2.712013000 | -0.740517000 |
| 1  | 6.443251000  | -4.031564000 | -1.696815000 |
| 6  | -2.294726000 | -2.735130000 | -0.328872000 |
| 1  | -1.776257000 | -2.676201000 | -1.298832000 |
| 1  | -3.067217000 | -3.509296000 | -0.386940000 |
| 6  | -4.324824000 | -1.219259000 | 0.089157000  |
| 6  | -5.112356000 | -1.819072000 | -0.902147000 |
| 6  | -4.961889000 | -0.504134000 | 1.108228000  |
| 6  | -6.492650000 | -1.695295000 | -0.884211000 |
| 1  | -4.629062000 | -2.366252000 | -1.710795000 |
| 6  | -6.346113000 | -0.383936000 | 1.126115000  |
| 1  | -4.370011000 | -0.056416000 | 1.902900000  |
| 6  | -7.116163000 | -0.975693000 | 0.132138000  |
| 1  | -7.085693000 | -2.162932000 | -1.666124000 |
| 1  | -6.825036000 | 0.166751000  | 1.931868000  |
| 1  | -8.198996000 | -0.883608000 | 0.151583000  |

|                                              |                             |
|----------------------------------------------|-----------------------------|
| Zero-point correction=                       | 0.624713 (Hartree/Particle) |
| Thermal correction to Energy=                | 0.664410                    |
| Thermal correction to Enthalpy=              | 0.665355                    |
| Thermal correction to Gibbs Free Energy=     | 0.553461                    |
| Sum of electronic and zero-point Energies=   | -2676.076160                |
| Sum of electronic and thermal Energies=      | -2676.036462                |
| Sum of electronic and thermal Enthalpies=    | -2676.035518                |
| Sum of electronic and thermal Free Energies= | -2676.147411                |

**B-6d**

|    |              |              |              |
|----|--------------|--------------|--------------|
| 6  | -0.673648000 | -4.233780000 | 2.015577000  |
| 6  | -1.380132000 | -4.042375000 | 0.831359000  |
| 6  | -1.844982000 | -2.771479000 | 0.528688000  |
| 6  | -1.592930000 | -1.705211000 | 1.414552000  |
| 6  | -0.853730000 | -1.893329000 | 2.586546000  |
| 6  | -0.407344000 | -3.169892000 | 2.884719000  |
| 1  | -0.312201000 | -5.228342000 | 2.267019000  |
| 1  | -1.555251000 | -4.873302000 | 0.151547000  |
| 1  | -0.633834000 | -1.054215000 | 3.241665000  |
| 1  | 0.158895000  | -3.349184000 | 3.794831000  |
| 6  | -2.969023000 | -0.859274000 | -0.363099000 |
| 6  | -2.086464000 | -0.512269000 | 0.798916000  |
| 6  | -1.810858000 | 0.836854000  | 0.892321000  |
| 6  | -2.273467000 | 1.414048000  | -0.311686000 |
| 6  | -2.409253000 | 2.774148000  | -0.645820000 |
| 6  | -2.639643000 | 0.362330000  | -1.295150000 |
| 6  | -3.107464000 | 3.096100000  | -1.780963000 |
| 1  | -2.017637000 | 3.544942000  | 0.011519000  |
| 6  | -3.488320000 | 0.792108000  | -2.411880000 |
| 1  | -1.663084000 | 0.055362000  | -1.769342000 |
| 6  | -3.675661000 | 2.111339000  | -2.651985000 |
| 1  | -3.261392000 | 4.145792000  | -2.021956000 |
| 1  | -3.865154000 | 0.042316000  | -3.104202000 |
| 1  | -4.235166000 | 2.441981000  | -3.522483000 |
| 6  | -1.062688000 | 1.513465000  | 1.984421000  |
| 1  | -1.548868000 | 1.365059000  | 2.956843000  |
| 1  | -0.053035000 | 1.082205000  | 2.026350000  |
| 1  | -0.941694000 | 2.587456000  | 1.812936000  |
| 16 | 1.594548000  | 3.786546000  | 0.302645000  |
| 8  | 2.368335000  | 4.569556000  | -0.643639000 |
| 8  | 0.484481000  | 2.953473000  | -0.474886000 |
| 8  | 0.877156000  | 4.434816000  | 1.389531000  |
| 6  | 2.647046000  | 2.524778000  | 0.965272000  |
| 6  | 3.543447000  | 1.881055000  | 0.115255000  |

|    |              |              |              |
|----|--------------|--------------|--------------|
| 6  | 4.293357000  | 0.825075000  | 0.605959000  |
| 6  | 4.172847000  | 0.412977000  | 1.936538000  |
| 6  | 3.290274000  | 1.095226000  | 2.773555000  |
| 6  | 2.519944000  | 2.148744000  | 2.295145000  |
| 1  | 3.625402000  | 2.189004000  | -0.924222000 |
| 1  | 4.972700000  | 0.291466000  | -0.059196000 |
| 1  | 3.202587000  | 0.790889000  | 3.815684000  |
| 1  | 1.828137000  | 2.686015000  | 2.939336000  |
| 6  | 4.988760000  | -0.739163000 | 2.436724000  |
| 1  | 4.692516000  | -1.038256000 | 3.447310000  |
| 1  | 4.878735000  | -1.606723000 | 1.773248000  |
| 1  | 6.056831000  | -0.489649000 | 2.462035000  |
| 16 | 1.056396000  | -0.310180000 | -1.231484000 |
| 8  | -0.022091000 | -1.054184000 | -1.934834000 |
| 8  | 0.831702000  | -0.175236000 | 0.215100000  |
| 8  | 1.357845000  | 0.984116000  | -1.916164000 |
| 1  | 0.876599000  | 2.246373000  | -1.083582000 |
| 6  | 2.536773000  | -1.281587000 | -1.393936000 |
| 6  | 2.794036000  | -2.259417000 | -0.439718000 |
| 6  | 3.947440000  | -3.026760000 | -0.546788000 |
| 6  | 4.852011000  | -2.825386000 | -1.592166000 |
| 6  | 4.574409000  | -1.829480000 | -2.532622000 |
| 6  | 3.421671000  | -1.059852000 | -2.442493000 |
| 1  | 2.099666000  | -2.385829000 | 0.390258000  |
| 1  | 4.158183000  | -3.794277000 | 0.197947000  |
| 1  | 5.279107000  | -1.654845000 | -3.344994000 |
| 1  | 3.210556000  | -0.271592000 | -3.160637000 |
| 6  | 6.085534000  | -3.667852000 | -1.717649000 |
| 1  | 6.954229000  | -3.068249000 | -2.011921000 |
| 1  | 6.325427000  | -4.173553000 | -0.776615000 |
| 1  | 5.958823000  | -4.443835000 | -2.483288000 |
| 6  | -2.528717000 | -2.297114000 | -0.725186000 |
| 1  | -1.785540000 | -2.272725000 | -1.533556000 |
| 1  | -3.358471000 | -2.946508000 | -1.023441000 |
| 6  | -4.457236000 | -0.816715000 | 0.000496000  |
| 6  | -5.393928000 | -1.296133000 | -0.921137000 |
| 6  | -4.925707000 | -0.302701000 | 1.209897000  |
| 6  | -6.754398000 | -1.251833000 | -0.649686000 |
| 1  | -5.054780000 | -1.718420000 | -1.866515000 |
| 6  | -6.289407000 | -0.262711000 | 1.486157000  |
| 1  | -4.224265000 | 0.070792000  | 1.951851000  |
| 6  | -7.208676000 | -0.733616000 | 0.559030000  |
| 1  | -7.462363000 | -1.629732000 | -1.383489000 |
| 1  | -6.630200000 | 0.138275000  | 2.437748000  |

|                                              |              |              |                             |
|----------------------------------------------|--------------|--------------|-----------------------------|
| 1                                            | -8.273209000 | -0.702779000 | 0.776885000                 |
| Zero-point correction=                       |              |              | 0.625403 (Hartree/Particle) |
| Thermal correction to Energy=                |              |              | 0.665841                    |
| Thermal correction to Enthalpy=              |              |              | 0.666785                    |
| Thermal correction to Gibbs Free Energy=     |              |              | 0.550228                    |
| Sum of electronic and zero-point Energies=   |              |              | -2676.094026                |
| Sum of electronic and thermal Energies=      |              |              | -2676.053589                |
| Sum of electronic and thermal Enthalpies=    |              |              | -2676.052644                |
| Sum of electronic and thermal Free Energies= |              |              | -2676.169202                |

**B-TSd7**

|    |              |              |              |
|----|--------------|--------------|--------------|
| 6  | -1.706635000 | -3.697476000 | 2.939115000  |
| 6  | -2.005748000 | -3.603239000 | 1.580323000  |
| 6  | -2.196687000 | -2.349877000 | 1.023136000  |
| 6  | -2.084929000 | -1.196528000 | 1.823181000  |
| 6  | -1.762335000 | -1.291216000 | 3.176061000  |
| 6  | -1.583337000 | -2.553697000 | 3.728442000  |
| 1  | -1.565398000 | -4.676688000 | 3.390951000  |
| 1  | -2.086541000 | -4.500057000 | 0.969061000  |
| 1  | -1.671923000 | -0.399432000 | 3.791569000  |
| 1  | -1.347679000 | -2.652620000 | 4.785052000  |
| 6  | -2.964892000 | -0.520377000 | -0.310129000 |
| 6  | -2.298266000 | -0.058847000 | 0.960734000  |
| 6  | -1.810606000 | 1.212589000  | 0.899399000  |
| 6  | -2.007090000 | 1.661304000  | -0.449763000 |
| 6  | -1.735549000 | 2.906977000  | -1.025598000 |
| 6  | -2.482987000 | 0.571345000  | -1.288471000 |
| 6  | -2.102759000 | 3.117865000  | -2.340866000 |
| 1  | -1.261281000 | 3.694369000  | -0.446884000 |
| 6  | -3.013356000 | 0.900726000  | -2.584699000 |
| 1  | -1.410905000 | 0.144827000  | -1.705151000 |
| 6  | -2.764432000 | 2.136917000  | -3.116258000 |
| 1  | -1.897276000 | 4.085857000  | -2.792895000 |
| 1  | -3.486629000 | 0.123203000  | -3.180868000 |
| 1  | -3.059196000 | 2.369638000  | -4.135103000 |
| 6  | -1.032739000 | 1.919456000  | 1.954061000  |
| 1  | -1.613497000 | 2.047361000  | 2.874561000  |
| 1  | -0.136815000 | 1.325955000  | 2.185666000  |
| 1  | -0.678049000 | 2.900528000  | 1.626754000  |
| 16 | 2.489190000  | 3.525962000  | 0.706764000  |
| 8  | 3.445695000  | 4.085615000  | -0.230815000 |
| 8  | 1.146456000  | 3.145272000  | -0.074664000 |
| 8  | 2.044330000  | 4.275059000  | 1.866718000  |
| 6  | 3.098210000  | 1.949359000  | 1.234692000  |

|    |              |              |              |
|----|--------------|--------------|--------------|
| 6  | 3.908563000  | 1.209642000  | 0.378979000  |
| 6  | 4.311162000  | -0.059382000 | 0.766297000  |
| 6  | 3.922549000  | -0.593311000 | 1.998261000  |
| 6  | 3.124121000  | 0.178321000  | 2.843693000  |
| 6  | 2.705217000  | 1.447731000  | 2.468450000  |
| 1  | 4.203028000  | 1.625849000  | -0.581347000 |
| 1  | 4.924578000  | -0.658578000 | 0.092816000  |
| 1  | 2.823645000  | -0.227287000 | 3.808637000  |
| 1  | 2.089145000  | 2.061297000  | 3.121781000  |
| 6  | 4.373419000  | -1.964075000 | 2.400122000  |
| 1  | 5.429024000  | -1.964033000 | 2.700141000  |
| 1  | 3.790597000  | -2.348987000 | 3.243082000  |
| 1  | 4.276576000  | -2.668256000 | 1.564631000  |
| 16 | 1.016292000  | -0.055820000 | -1.347378000 |
| 8  | -0.154409000 | -0.485256000 | -2.207156000 |
| 8  | 0.677192000  | -0.084990000 | 0.078392000  |
| 8  | 1.594368000  | 1.223389000  | -1.832330000 |
| 1  | 1.333649000  | 2.477321000  | -0.797887000 |
| 6  | 2.261493000  | -1.288803000 | -1.622839000 |
| 6  | 2.225886000  | -2.449999000 | -0.860041000 |
| 6  | 3.203967000  | -3.417268000 | -1.052227000 |
| 6  | 4.220619000  | -3.235070000 | -1.993465000 |
| 6  | 4.237191000  | -2.053881000 | -2.740131000 |
| 6  | 3.262356000  | -1.080544000 | -2.564335000 |
| 1  | 1.454331000  | -2.568513000 | -0.101037000 |
| 1  | 3.187798000  | -4.329150000 | -0.456032000 |
| 1  | 5.031247000  | -1.896205000 | -3.468927000 |
| 1  | 3.280132000  | -0.152366000 | -3.129842000 |
| 6  | 5.263396000  | -4.288681000 | -2.214243000 |
| 1  | 6.251523000  | -3.846582000 | -2.382526000 |
| 1  | 5.335967000  | -4.969582000 | -1.360098000 |
| 1  | 5.029067000  | -4.896021000 | -3.097646000 |
| 6  | -2.452928000 | -1.983100000 | -0.416256000 |
| 1  | -1.509329000 | -2.005484000 | -0.980288000 |
| 1  | -3.156709000 | -2.662052000 | -0.909605000 |
| 6  | -4.492157000 | -0.482762000 | -0.230746000 |
| 6  | -5.247906000 | -1.100346000 | -1.231592000 |
| 6  | -5.165778000 | 0.192393000  | 0.786604000  |
| 6  | -6.635285000 | -1.043497000 | -1.218448000 |
| 1  | -4.745476000 | -1.638082000 | -2.035580000 |
| 6  | -6.556283000 | 0.246010000  | 0.804419000  |
| 1  | -4.600228000 | 0.681867000  | 1.575912000  |
| 6  | -7.296276000 | -0.369596000 | -0.196333000 |
| 1  | -7.201648000 | -1.531663000 | -2.008104000 |

|                                              |              |              |                             |
|----------------------------------------------|--------------|--------------|-----------------------------|
| 1                                            | -7.061238000 | 0.772187000  | 1.611124000                 |
| 1                                            | -8.382402000 | -0.327979000 | -0.180418000                |
| Zero-point correction=                       |              |              | 0.622909 (Hartree/Particle) |
| Thermal correction to Energy=                |              |              | 0.662358                    |
| Thermal correction to Enthalpy=              |              |              | 0.663302                    |
| Thermal correction to Gibbs Free Energy=     |              |              | 0.551556                    |
| Sum of electronic and zero-point Energies=   |              |              | -2676.096031                |
| Sum of electronic and thermal Energies=      |              |              | -2676.056582                |
| Sum of electronic and thermal Enthalpies=    |              |              | -2676.055638                |
| Sum of electronic and thermal Free Energies= |              |              | -2676.167384                |

### B-p1

|    |              |              |              |
|----|--------------|--------------|--------------|
| 6  | -0.948650000 | -3.580535000 | 2.235753000  |
| 6  | -1.491037000 | -3.301404000 | 0.979561000  |
| 6  | -1.873436000 | -2.002688000 | 0.682652000  |
| 6  | -1.732131000 | -0.977306000 | 1.639366000  |
| 6  | -1.183890000 | -1.258874000 | 2.888943000  |
| 6  | -0.794374000 | -2.564709000 | 3.177980000  |
| 1  | -0.651428000 | -4.597198000 | 2.484495000  |
| 1  | -1.603267000 | -4.090973000 | 0.237089000  |
| 1  | -1.082405000 | -0.478083000 | 3.640254000  |
| 1  | -0.371426000 | -2.795761000 | 4.153885000  |
| 6  | -2.975243000 | -0.078708000 | -0.223573000 |
| 6  | -2.151721000 | 0.261862000  | 1.006220000  |
| 6  | -1.673814000 | 1.524660000  | 0.975702000  |
| 6  | -2.039861000 | 2.100849000  | -0.321465000 |
| 6  | -1.669133000 | 3.317997000  | -0.884816000 |
| 6  | -2.736965000 | 1.141881000  | -1.087304000 |
| 6  | -2.012547000 | 3.576771000  | -2.212411000 |
| 1  | -1.099141000 | 4.046307000  | -0.311016000 |
| 6  | -3.090783000 | 1.412870000  | -2.399214000 |
| 1  | -0.766292000 | 0.808055000  | -2.337153000 |
| 6  | -2.714288000 | 2.638278000  | -2.964202000 |
| 1  | -1.717953000 | 4.518537000  | -2.668808000 |
| 1  | -3.632437000 | 0.679188000  | -2.994985000 |
| 1  | -2.961758000 | 2.851369000  | -4.001030000 |
| 6  | -0.748890000 | 2.190394000  | 1.925858000  |
| 1  | -1.240550000 | 3.014367000  | 2.459323000  |
| 1  | -0.370388000 | 1.482470000  | 2.671354000  |
| 1  | 0.114750000  | 2.612235000  | 1.392872000  |
| 16 | 3.403260000  | 3.157608000  | 0.770992000  |
| 8  | 4.577080000  | 3.312954000  | -0.067395000 |
| 8  | 2.091438000  | 3.319426000  | -0.150486000 |
| 8  | 3.155281000  | 4.008241000  | 1.914691000  |

|    |              |              |              |
|----|--------------|--------------|--------------|
| 6  | 3.320015000  | 1.463495000  | 1.287120000  |
| 6  | 4.000562000  | 0.492851000  | 0.561911000  |
| 6  | 3.871635000  | -0.839399000 | 0.936748000  |
| 6  | 3.062202000  | -1.209745000 | 2.012037000  |
| 6  | 2.397991000  | -0.209594000 | 2.729290000  |
| 6  | 2.530214000  | 1.125301000  | 2.381189000  |
| 1  | 4.621101000  | 0.787453000  | -0.281229000 |
| 1  | 4.397050000  | -1.611237000 | 0.374859000  |
| 1  | 1.766900000  | -0.491072000 | 3.572753000  |
| 1  | 2.034980000  | 1.910612000  | 2.947013000  |
| 6  | 2.882420000  | -2.648944000 | 2.384175000  |
| 1  | 1.882718000  | -3.001160000 | 2.091635000  |
| 1  | 3.620399000  | -3.290009000 | 1.890229000  |
| 1  | 2.966691000  | -2.797014000 | 3.467130000  |
| 16 | 1.194614000  | 0.344228000  | -1.588928000 |
| 8  | 0.002007000  | 0.294280000  | -2.671440000 |
| 8  | 0.610869000  | 0.527345000  | -0.276298000 |
| 8  | 2.198797000  | 1.295021000  | -2.064317000 |
| 1  | 2.203014000  | 2.782855000  | -0.968111000 |
| 6  | 1.838633000  | -1.286582000 | -1.739478000 |
| 6  | 1.368078000  | -2.264123000 | -0.866208000 |
| 6  | 1.888337000  | -3.545315000 | -0.966658000 |
| 6  | 2.872836000  | -3.854399000 | -1.911011000 |
| 6  | 3.334832000  | -2.843728000 | -2.758360000 |
| 6  | 2.823415000  | -1.555070000 | -2.681660000 |
| 1  | 0.628911000  | -2.020819000 | -0.101391000 |
| 1  | 1.532239000  | -4.320115000 | -0.287947000 |
| 1  | 4.111873000  | -3.071684000 | -3.485515000 |
| 1  | 3.190389000  | -0.760827000 | -3.326591000 |
| 6  | 3.410656000  | -5.247940000 | -2.017956000 |
| 1  | 2.738716000  | -5.881649000 | -2.610132000 |
| 1  | 4.390092000  | -5.265874000 | -2.505815000 |
| 1  | 3.509719000  | -5.716420000 | -1.032951000 |
| 6  | -2.373004000 | -1.449837000 | -0.630836000 |
| 1  | -1.529233000 | -1.309427000 | -1.323607000 |
| 1  | -3.088783000 | -2.114056000 | -1.128079000 |
| 6  | -4.470727000 | -0.215533000 | 0.070452000  |
| 6  | -5.321510000 | -0.771440000 | -0.889163000 |
| 6  | -5.030629000 | 0.244142000  | 1.261932000  |
| 6  | -6.687982000 | -0.873113000 | -0.663097000 |
| 1  | -4.913037000 | -1.134963000 | -1.831968000 |
| 6  | -6.398627000 | 0.139855000  | 1.493280000  |
| 1  | -4.385871000 | 0.687324000  | 2.017512000  |
| 6  | -7.232926000 | -0.419823000 | 0.533958000  |

|                                              |              |              |                             |
|----------------------------------------------|--------------|--------------|-----------------------------|
| 1                                            | -7.329814000 | -1.309785000 | -1.424901000                |
| 1                                            | -6.811869000 | 0.498700000  | 2.433267000                 |
| 1                                            | -8.301583000 | -0.503254000 | 0.716197000                 |
| Zero-point correction=                       |              |              | 0.627521 (Hartree/Particle) |
| Thermal correction to Energy=                |              |              | 0.667763                    |
| Thermal correction to Enthalpy=              |              |              | 0.668708                    |
| Thermal correction to Gibbs Free Energy=     |              |              | 0.555254                    |
| Sum of electronic and zero-point Energies=   |              |              | -2676.131302                |
| Sum of electronic and thermal Energies=      |              |              | -2676.091060                |
| Sum of electronic and thermal Enthalpies=    |              |              | -2676.090115                |
| Sum of electronic and thermal Free Energies= |              |              | -2676.203569                |

### B-TSe5

|    |              |              |              |
|----|--------------|--------------|--------------|
| 6  | -0.644194000 | -2.372037000 | 3.737904000  |
| 6  | 0.024633000  | -1.177566000 | 3.876435000  |
| 6  | 0.921957000  | -0.797883000 | 2.862798000  |
| 6  | 1.153662000  | -1.617226000 | 1.722067000  |
| 6  | 0.425770000  | -2.804654000 | 1.578616000  |
| 6  | -0.445293000 | -3.166530000 | 2.591867000  |
| 1  | -1.345457000 | -2.700588000 | 4.500522000  |
| 1  | -0.140871000 | -0.530401000 | 4.734699000  |
| 1  | 0.495999000  | -3.418857000 | 0.685156000  |
| 1  | -1.002258000 | -4.096670000 | 2.493908000  |
| 6  | 1.659744000  | 0.386786000  | 2.704948000  |
| 6  | 2.266386000  | 0.446064000  | 1.425412000  |
| 6  | 2.073751000  | -0.929235000 | 0.837393000  |
| 1  | 1.317978000  | 1.156681000  | 0.903145000  |
| 6  | 2.718008000  | -1.436148000 | -0.251731000 |
| 6  | 3.434723000  | -0.561357000 | -1.199661000 |
| 6  | 2.731118000  | 0.400649000  | -1.930454000 |
| 6  | 4.810046000  | -0.712486000 | -1.410526000 |
| 6  | 3.397174000  | 1.192440000  | -2.858796000 |
| 1  | 1.657828000  | 0.514724000  | -1.785333000 |
| 6  | 5.476057000  | 0.107099000  | -2.309902000 |
| 1  | 5.362385000  | -1.454182000 | -0.834694000 |
| 6  | 4.767664000  | 1.054923000  | -3.044402000 |
| 1  | 2.837308000  | 1.924669000  | -3.435398000 |
| 1  | 6.549448000  | 0.000084000  | -2.446570000 |
| 1  | 5.286987000  | 1.683979000  | -3.763556000 |
| 6  | 2.745109000  | -2.895254000 | -0.569748000 |
| 1  | 2.647937000  | -3.525725000 | 0.318319000  |
| 1  | 1.722166000  | 1.194398000  | 3.431004000  |
| 1  | 3.671519000  | -3.152547000 | -1.094037000 |
| 16 | -1.371791000 | -2.867505000 | -1.867073000 |



|    |              |              |              |
|----|--------------|--------------|--------------|
| 8  | -1.651062000 | -2.761308000 | -3.286998000 |
| 8  | -0.141761000 | -1.919533000 | -1.495115000 |
| 8  | -1.034098000 | -4.146628000 | -1.265633000 |
| 1  | 1.915148000  | -3.134319000 | -1.250898000 |
| 6  | -2.725689000 | -2.140871000 | -0.985668000 |
| 6  | -3.372949000 | -1.031097000 | -1.525113000 |
| 6  | -4.377827000 | -0.419654000 | -0.792252000 |
| 6  | -4.757000000 | -0.912564000 | 0.460998000  |
| 6  | -4.110466000 | -2.040845000 | 0.963520000  |
| 6  | -3.090524000 | -2.656671000 | 0.249215000  |
| 1  | -3.077934000 | -0.648548000 | -2.499443000 |
| 1  | -4.871811000 | 0.469065000  | -1.186127000 |
| 1  | -4.409151000 | -2.438089000 | 1.932549000  |
| 1  | -2.579764000 | -3.535638000 | 0.632579000  |
| 6  | -5.842462000 | -0.229643000 | 1.235057000  |
| 1  | -5.971271000 | -0.670817000 | 2.228551000  |
| 1  | -5.617189000 | 0.837836000  | 1.360465000  |
| 1  | -6.805250000 | -0.292553000 | 0.713238000  |
| 16 | -0.804093000 | 1.121713000  | -0.166573000 |
| 8  | 0.394608000  | 1.957901000  | 0.255237000  |
| 8  | -1.089789000 | 0.067515000  | 0.805541000  |
| 8  | -0.647133000 | 0.669784000  | -1.575149000 |
| 1  | -0.353010000 | -0.952345000 | -1.635236000 |
| 6  | -2.179653000 | 2.237823000  | -0.183644000 |
| 6  | -2.983195000 | 2.333840000  | 0.947364000  |
| 6  | -4.081415000 | 3.182027000  | 0.924553000  |
| 6  | -4.392678000 | 3.929452000  | -0.215489000 |
| 6  | -3.574437000 | 3.804835000  | -1.339905000 |
| 6  | -2.468271000 | 2.964531000  | -1.331999000 |
| 1  | -2.754876000 | 1.723445000  | 1.818165000  |
| 1  | -4.718526000 | 3.264075000  | 1.805119000  |
| 1  | -3.814782000 | 4.372440000  | -2.237524000 |
| 1  | -1.842797000 | 2.848085000  | -2.213034000 |
| 6  | -5.571677000 | 4.854227000  | -0.218283000 |
| 1  | -5.878476000 | 5.112756000  | -1.236656000 |
| 1  | -6.431887000 | 4.409550000  | 0.294195000  |
| 1  | -5.337828000 | 5.791729000  | 0.301745000  |
| 6  | 3.546303000  | 1.212375000  | 1.271278000  |
| 6  | 3.642327000  | 2.360392000  | 0.486820000  |
| 6  | 4.682557000  | 0.746479000  | 1.939314000  |
| 6  | 4.860412000  | 3.019166000  | 0.359136000  |
| 1  | 2.760573000  | 2.723850000  | -0.037582000 |
| 6  | 5.898660000  | 1.404302000  | 1.811367000  |
| 1  | 4.604888000  | -0.155357000 | 2.547303000  |

|                                              |             |             |                             |
|----------------------------------------------|-------------|-------------|-----------------------------|
| 6                                            | 5.989473000 | 2.543239000 | 1.016658000                 |
| 1                                            | 4.926309000 | 3.909460000 | -0.261991000                |
| 1                                            | 6.776737000 | 1.028219000 | 2.331551000                 |
| 1                                            | 6.941121000 | 3.058835000 | 0.910235000                 |
| Zero-point correction=                       |             |             | 0.619186 (Hartree/Particle) |
| Thermal correction to Energy=                |             |             | 0.658914                    |
| Thermal correction to Enthalpy=              |             |             | 0.659858                    |
| Thermal correction to Gibbs Free Energy=     |             |             | 0.547492                    |
| Sum of electronic and zero-point Energies=   |             |             | -2676.092430                |
| Sum of electronic and thermal Energies=      |             |             | -2676.052702                |
| Sum of electronic and thermal Enthalpies=    |             |             | -2676.051758                |
| Sum of electronic and thermal Free Energies= |             |             | -2676.164124                |

### B-5e

|   |              |              |              |
|---|--------------|--------------|--------------|
| 6 | -1.604380000 | 2.024553000  | 3.128300000  |
| 6 | -0.730901000 | 2.683681000  | 2.309891000  |
| 6 | 0.289244000  | 1.926788000  | 1.674022000  |
| 6 | 0.436802000  | 0.511846000  | 1.899221000  |
| 6 | -0.529409000 | -0.145519000 | 2.682273000  |
| 6 | -1.510781000 | 0.616187000  | 3.281813000  |
| 1 | -2.405036000 | 2.562152000  | 3.629565000  |
| 1 | -0.814389000 | 3.750567000  | 2.114642000  |
| 1 | -0.545399000 | -1.227347000 | 2.773529000  |
| 1 | -2.258119000 | 0.112770000  | 3.891957000  |
| 6 | 1.220218000  | 2.320625000  | 0.738958000  |
| 6 | 2.016668000  | 1.182427000  | 0.266110000  |
| 6 | 1.554355000  | 0.030621000  | 1.143221000  |
| 1 | 1.629510000  | 0.991625000  | -0.768690000 |
| 6 | 2.146098000  | -1.202633000 | 1.190884000  |
| 6 | 3.144140000  | -1.587532000 | 0.181790000  |
| 6 | 2.825848000  | -1.544836000 | -1.181274000 |
| 6 | 4.420538000  | -2.011266000 | 0.575941000  |
| 6 | 3.770950000  | -1.921511000 | -2.127453000 |
| 1 | 1.833676000  | -1.228292000 | -1.494599000 |
| 6 | 5.371539000  | -2.346424000 | -0.375504000 |
| 1 | 4.678986000  | -2.030078000 | 1.633575000  |
| 6 | 5.044890000  | -2.310294000 | -1.729531000 |
| 1 | 3.504920000  | -1.900393000 | -3.181108000 |
| 1 | 6.369506000  | -2.642535000 | -0.062005000 |
| 1 | 5.786379000  | -2.590964000 | -2.473827000 |
| 6 | 1.846368000  | -2.210224000 | 2.244624000  |
| 1 | 1.530962000  | -1.761476000 | 3.190929000  |
| 1 | 1.353569000  | 3.333147000  | 0.364239000  |
| 1 | 2.713649000  | -2.854303000 | 2.420574000  |

|    |              |              |              |
|----|--------------|--------------|--------------|
| 16 | -1.692139000 | -3.472230000 | 0.489228000  |
| 8  | -2.093447000 | -4.842815000 | 0.251007000  |
| 8  | -0.609063000 | -3.117818000 | -0.599719000 |
| 8  | -1.202373000 | -3.109173000 | 1.820805000  |
| 1  | 1.029897000  | -2.865397000 | 1.901470000  |
| 6  | -3.016542000 | -2.355739000 | 0.106696000  |
| 6  | -3.359187000 | -2.108952000 | -1.219583000 |
| 6  | -4.405705000 | -1.242574000 | -1.492698000 |
| 6  | -5.126063000 | -0.631130000 | -0.462065000 |
| 6  | -4.771900000 | -0.907320000 | 0.859962000  |
| 6  | -3.717425000 | -1.765340000 | 1.151289000  |
| 1  | -2.781549000 | -2.547100000 | -2.029023000 |
| 1  | -4.648367000 | -1.011903000 | -2.528524000 |
| 1  | -5.325983000 | -0.435482000 | 1.670846000  |
| 1  | -3.424251000 | -1.975314000 | 2.177049000  |
| 6  | -6.220041000 | 0.339622000  | -0.785148000 |
| 1  | -6.930927000 | -0.081998000 | -1.504752000 |
| 1  | -6.777549000 | 0.635063000  | 0.109710000  |
| 1  | -5.807217000 | 1.249505000  | -1.240583000 |
| 16 | -0.581330000 | 0.240617000  | -2.067599000 |
| 8  | 0.742584000  | 0.679798000  | -2.563564000 |
| 8  | -0.438249000 | -0.578243000 | -0.810725000 |
| 8  | -1.471412000 | -0.364055000 | -3.057326000 |
| 1  | -0.502618000 | -2.111768000 | -0.715386000 |
| 6  | -1.361261000 | 1.723855000  | -1.442569000 |
| 6  | -2.423899000 | 1.604090000  | -0.550528000 |
| 6  | -3.019900000 | 2.747111000  | -0.041999000 |
| 6  | -2.570894000 | 4.022381000  | -0.406868000 |
| 6  | -1.503379000 | 4.119409000  | -1.298502000 |
| 6  | -0.898706000 | 2.977446000  | -1.821107000 |
| 1  | -2.751999000 | 0.617272000  | -0.232556000 |
| 1  | -3.837331000 | 2.654519000  | 0.675581000  |
| 1  | -1.141183000 | 5.104677000  | -1.590359000 |
| 1  | -0.060193000 | 3.045022000  | -2.510428000 |
| 6  | -3.224202000 | 5.244064000  | 0.165483000  |
| 1  | -3.324442000 | 5.169272000  | 1.256220000  |
| 1  | -2.655564000 | 6.151545000  | -0.061518000 |
| 1  | -4.236286000 | 5.380588000  | -0.235149000 |
| 6  | 3.497215000  | 1.469190000  | 0.187679000  |
| 6  | 4.171124000  | 1.436137000  | -1.030709000 |
| 6  | 4.203291000  | 1.751913000  | 1.358382000  |
| 6  | 5.543406000  | 1.655791000  | -1.073381000 |
| 1  | 3.615625000  | 1.212673000  | -1.940387000 |
| 6  | 5.572611000  | 1.977659000  | 1.314404000  |

|                                              |             |             |                             |
|----------------------------------------------|-------------|-------------|-----------------------------|
| 1                                            | 3.672365000 | 1.769220000 | 2.311291000                 |
| 6                                            | 6.245576000 | 1.924630000 | 0.096640000                 |
| 1                                            | 6.065880000 | 1.612424000 | -2.026001000                |
| 1                                            | 6.117594000 | 2.191335000 | 2.230935000                 |
| 1                                            | 7.319230000 | 2.092845000 | 0.060912000                 |
| Zero-point correction=                       |             |             | 0.625716 (Hartree/Particle) |
| Thermal correction to Energy=                |             |             | 0.665986                    |
| Thermal correction to Enthalpy=              |             |             | 0.666930                    |
| Thermal correction to Gibbs Free Energy=     |             |             | 0.554369                    |
| Sum of electronic and zero-point Energies=   |             |             | -2676.106835                |
| Sum of electronic and thermal Energies=      |             |             | -2676.066565                |
| Sum of electronic and thermal Enthalpies=    |             |             | -2676.065621                |
| Sum of electronic and thermal Free Energies= |             |             | -2676.178182                |

### B-TSf3

|   |              |              |              |
|---|--------------|--------------|--------------|
| 6 | -1.859084000 | -3.783005000 | 3.427356000  |
| 6 | -1.873245000 | -4.020682000 | 2.056219000  |
| 6 | -2.097657000 | -2.946901000 | 1.206711000  |
| 6 | -2.283312000 | -1.659337000 | 1.713605000  |
| 6 | -2.265691000 | -1.420496000 | 3.077525000  |
| 6 | -2.050160000 | -2.497834000 | 3.933335000  |
| 1 | -1.683440000 | -4.607908000 | 4.113413000  |
| 1 | -1.696570000 | -5.018442000 | 1.660777000  |
| 1 | -2.410251000 | -0.414093000 | 3.466696000  |
| 1 | -2.022764000 | -2.334750000 | 5.007750000  |
| 6 | -2.032606000 | -2.863289000 | -0.274117000 |
| 6 | -2.310325000 | -1.525037000 | -0.642680000 |
| 6 | -2.504428000 | -0.687029000 | 0.591473000  |
| 1 | -1.793820000 | 0.149110000  | 0.613359000  |
| 6 | -3.937397000 | -0.131107000 | 0.516059000  |
| 6 | -4.101992000 | 1.290723000  | 0.157637000  |
| 6 | -5.042453000 | 1.673235000  | -0.805584000 |
| 6 | -3.321115000 | 2.278841000  | 0.766642000  |
| 6 | -5.200365000 | 3.010022000  | -1.147111000 |
| 1 | -5.624729000 | 0.902052000  | -1.307737000 |
| 6 | -3.479592000 | 3.615245000  | 0.426069000  |
| 1 | -2.580527000 | 2.007637000  | 1.519133000  |
| 6 | -4.418742000 | 3.983522000  | -0.532221000 |
| 1 | -5.926812000 | 3.291533000  | -1.906011000 |
| 1 | -2.850847000 | 4.361591000  | 0.904770000  |
| 1 | -4.533832000 | 5.029070000  | -0.807941000 |
| 6 | -4.981213000 | -0.940820000 | 0.719055000  |
| 1 | -4.851520000 | -1.990748000 | 0.973052000  |
| 1 | -2.297957000 | -3.703213000 | -0.921197000 |

|    |              |              |              |
|----|--------------|--------------|--------------|
| 1  | -5.998705000 | -0.560556000 | 0.677837000  |
| 16 | 1.257946000  | -1.951656000 | 0.294262000  |
| 8  | 1.415403000  | -2.243306000 | 1.713094000  |
| 8  | 0.531527000  | -0.675843000 | -0.000544000 |
| 8  | 0.620004000  | -3.052740000 | -0.521201000 |
| 1  | -0.803280000 | -2.849764000 | -0.486408000 |
| 6  | 2.881896000  | -1.768668000 | -0.401921000 |
| 6  | 3.982458000  | -1.802117000 | 0.441809000  |
| 6  | 5.250943000  | -1.589189000 | -0.087709000 |
| 6  | 5.428904000  | -1.340478000 | -1.447385000 |
| 6  | 4.303075000  | -1.329879000 | -2.281185000 |
| 6  | 3.032553000  | -1.539530000 | -1.768084000 |
| 1  | 3.831848000  | -1.988434000 | 1.501752000  |
| 1  | 6.120308000  | -1.610305000 | 0.568121000  |
| 1  | 4.433307000  | -1.147229000 | -3.347448000 |
| 1  | 2.157001000  | -1.526500000 | -2.413856000 |
| 6  | 6.786269000  | -1.047255000 | -2.010402000 |
| 1  | 7.011693000  | -1.679595000 | -2.876916000 |
| 1  | 6.850710000  | -0.005021000 | -2.352107000 |
| 1  | 7.573207000  | -1.198967000 | -1.264713000 |
| 16 | 0.287588000  | 2.492860000  | 0.990787000  |
| 8  | -0.107969000 | 3.576864000  | 1.868666000  |
| 8  | -0.312113000 | 2.364300000  | -0.330712000 |
| 8  | 0.017454000  | 1.153364000  | 1.815665000  |
| 1  | 0.259361000  | 0.364602000  | 1.241331000  |
| 6  | 2.045558000  | 2.493495000  | 0.793822000  |
| 6  | 2.838443000  | 3.171100000  | 1.711844000  |
| 6  | 4.219374000  | 3.121458000  | 1.569930000  |
| 6  | 4.808990000  | 2.401409000  | 0.528750000  |
| 6  | 3.983835000  | 1.743026000  | -0.386186000 |
| 6  | 2.604165000  | 1.778696000  | -0.262011000 |
| 1  | 2.368347000  | 3.731306000  | 2.515977000  |
| 1  | 4.853477000  | 3.649585000  | 2.280224000  |
| 1  | 4.433261000  | 1.180459000  | -1.204467000 |
| 1  | 1.960645000  | 1.249759000  | -0.961285000 |
| 6  | 6.298079000  | 2.301224000  | 0.400738000  |
| 1  | 6.611720000  | 2.319392000  | -0.649503000 |
| 1  | 6.809106000  | 3.115079000  | 0.925141000  |
| 1  | 6.661927000  | 1.356484000  | 0.826742000  |
| 6  | -2.356193000 | -1.003417000 | -1.982567000 |
| 6  | -2.084532000 | 0.355919000  | -2.220036000 |
| 6  | -2.633187000 | -1.849514000 | -3.072405000 |
| 6  | -2.100145000 | 0.850097000  | -3.515629000 |
| 1  | -1.807985000 | 1.011946000  | -1.398230000 |

|                                              |              |              |                             |
|----------------------------------------------|--------------|--------------|-----------------------------|
| 6                                            | -2.654554000 | -1.347281000 | -4.360106000                |
| 1                                            | -2.858470000 | -2.898646000 | -2.895576000                |
| 6                                            | -2.388540000 | 0.004839000  | -4.581843000                |
| 1                                            | -1.878366000 | 1.899618000  | -3.687615000                |
| 1                                            | -2.882980000 | -2.002891000 | -5.196096000                |
| 1                                            | -2.404146000 | 0.397556000  | -5.595882000                |
| Zero-point correction=                       |              |              | 0.621315 (Hartree/Particle) |
| Thermal correction to Energy=                |              |              | 0.661113                    |
| Thermal correction to Enthalpy=              |              |              | 0.662057                    |
| Thermal correction to Gibbs Free Energy=     |              |              | 0.548617                    |
| Sum of electronic and zero-point Energies=   |              |              | -2676.079935                |
| Sum of electronic and thermal Energies=      |              |              | -2676.040137                |
| Sum of electronic and thermal Enthalpies=    |              |              | -2676.039193                |
| Sum of electronic and thermal Free Energies= |              |              | -2676.152632                |

### B-3f

|   |              |              |              |
|---|--------------|--------------|--------------|
| 6 | -6.733669000 | 3.608508000  | 0.269497000  |
| 6 | -6.615662000 | 2.510475000  | 1.117366000  |
| 6 | -5.579478000 | 1.613892000  | 0.898373000  |
| 6 | -4.680864000 | 1.803238000  | -0.150865000 |
| 6 | -4.798507000 | 2.894163000  | -0.999380000 |
| 6 | -5.831789000 | 3.800110000  | -0.776584000 |
| 1 | -7.533238000 | 4.327759000  | 0.428213000  |
| 1 | -7.317774000 | 2.366555000  | 1.936269000  |
| 1 | -4.091193000 | 3.038552000  | -1.812913000 |
| 1 | -5.935036000 | 4.667833000  | -1.423042000 |
| 6 | -5.225148000 | 0.371434000  | 1.666924000  |
| 6 | -3.924185000 | -0.058682000 | 1.057399000  |
| 6 | -3.690610000 | 0.678610000  | -0.210015000 |
| 1 | -2.647336000 | 0.988583000  | -0.387907000 |
| 6 | -4.086974000 | -0.454751000 | -1.212898000 |
| 6 | -3.049872000 | -1.434602000 | -1.577840000 |
| 6 | -3.288330000 | -2.803050000 | -1.387990000 |
| 6 | -1.808612000 | -1.023599000 | -2.074400000 |
| 6 | -2.300328000 | -3.735224000 | -1.673937000 |
| 1 | -4.247064000 | -3.122376000 | -0.979562000 |
| 6 | -0.823591000 | -1.959331000 | -2.364311000 |
| 1 | -1.585079000 | 0.032969000  | -2.212600000 |
| 6 | -1.062920000 | -3.313481000 | -2.154559000 |
| 1 | -2.489123000 | -4.792628000 | -1.503609000 |
| 1 | 0.142119000  | -1.608223000 | -2.720072000 |
| 1 | -0.273054000 | -4.035389000 | -2.346120000 |
| 6 | -5.357182000 | -0.573618000 | -1.620123000 |
| 1 | -6.139379000 | 0.115058000  | -1.309488000 |

|    |              |              |              |
|----|--------------|--------------|--------------|
| 1  | -5.986669000 | -0.420052000 | 1.582572000  |
| 1  | -5.627703000 | -1.348620000 | -2.332904000 |
| 16 | 2.938981000  | -2.868972000 | 0.210956000  |
| 8  | 2.206053000  | -2.871831000 | 1.473105000  |
| 8  | 1.977699000  | -2.348774000 | -0.941554000 |
| 8  | 3.541528000  | -4.091115000 | -0.281134000 |
| 1  | -5.090380000 | 0.539223000  | 2.745124000  |
| 6  | 4.177484000  | -1.604623000 | 0.300088000  |
| 6  | 3.919138000  | -0.436268000 | 1.014224000  |
| 6  | 4.871306000  | 0.570067000  | 1.013220000  |
| 6  | 6.071550000  | 0.429508000  | 0.309830000  |
| 6  | 6.310150000  | -0.757674000 | -0.382541000 |
| 6  | 5.367320000  | -1.778457000 | -0.394975000 |
| 1  | 2.972712000  | -0.313860000 | 1.534862000  |
| 1  | 4.674500000  | 1.498047000  | 1.551469000  |
| 1  | 7.246120000  | -0.880118000 | -0.925401000 |
| 1  | 5.540707000  | -2.706493000 | -0.933567000 |
| 6  | 7.060328000  | 1.554569000  | 0.291711000  |
| 1  | 7.972897000  | 1.287170000  | -0.250237000 |
| 1  | 6.624912000  | 2.440224000  | -0.191540000 |
| 1  | 7.344092000  | 1.854978000  | 1.307921000  |
| 16 | 0.661759000  | 1.043150000  | -0.809605000 |
| 8  | -0.640026000 | 1.625750000  | -0.408790000 |
| 8  | 0.813936000  | 0.767407000  | -2.243028000 |
| 8  | 0.988068000  | -0.147329000 | 0.049790000  |
| 1  | 1.554986000  | -1.477169000 | -0.654291000 |
| 6  | 1.903219000  | 2.246906000  | -0.381168000 |
| 6  | 1.863779000  | 2.856288000  | 0.870520000  |
| 6  | 2.874982000  | 3.733139000  | 1.233058000  |
| 6  | 3.932587000  | 4.013404000  | 0.359810000  |
| 6  | 3.942338000  | 3.401637000  | -0.892995000 |
| 6  | 2.936479000  | 2.515329000  | -1.266773000 |
| 1  | 1.035895000  | 2.642681000  | 1.542974000  |
| 1  | 2.850262000  | 4.216586000  | 2.209441000  |
| 1  | 4.751091000  | 3.624423000  | -1.588858000 |
| 1  | 2.939269000  | 2.031059000  | -2.239809000 |
| 6  | 5.039489000  | 4.931145000  | 0.783982000  |
| 1  | 5.687178000  | 5.198186000  | -0.057858000 |
| 1  | 4.650326000  | 5.859299000  | 1.218515000  |
| 1  | 5.670819000  | 4.461441000  | 1.550805000  |
| 6  | -3.074233000 | -1.043858000 | 1.580520000  |
| 6  | -1.719358000 | -1.100176000 | 1.163417000  |
| 6  | -3.560648000 | -2.015779000 | 2.498353000  |
| 6  | -0.888664000 | -2.107629000 | 1.622355000  |

|                                              |              |              |                             |
|----------------------------------------------|--------------|--------------|-----------------------------|
| 1                                            | -1.299839000 | -0.313904000 | 0.540733000                 |
| 6                                            | -2.735513000 | -3.030013000 | 2.920389000                 |
| 1                                            | -4.597456000 | -1.980741000 | 2.825687000                 |
| 6                                            | -1.401944000 | -3.076323000 | 2.476033000                 |
| 1                                            | 0.155506000  | -2.133034000 | 1.319984000                 |
| 1                                            | -3.109534000 | -3.794985000 | 3.595115000                 |
| 1                                            | -0.745829000 | -3.874453000 | 2.817094000                 |
| Zero-point correction=                       |              |              | 0.625325 (Hartree/Particle) |
| Thermal correction to Energy=                |              |              | 0.665788                    |
| Thermal correction to Enthalpy=              |              |              | 0.666732                    |
| Thermal correction to Gibbs Free Energy=     |              |              | 0.551931                    |
| Sum of electronic and zero-point Energies=   |              |              | -2676.075339                |
| Sum of electronic and thermal Energies=      |              |              | -2676.034876                |
| Sum of electronic and thermal Enthalpies=    |              |              | -2676.033932                |
| Sum of electronic and thermal Free Energies= |              |              | -2676.148733                |

#### B-TSf4

|   |              |              |              |
|---|--------------|--------------|--------------|
| 6 | -2.958019000 | 0.027704000  | -4.674647000 |
| 6 | -2.231467000 | 1.012425000  | -4.010489000 |
| 6 | -2.335762000 | 1.094380000  | -2.631442000 |
| 6 | -3.143320000 | 0.201862000  | -1.923482000 |
| 6 | -3.881979000 | -0.770651000 | -2.583138000 |
| 6 | -3.780581000 | -0.848583000 | -3.968513000 |
| 1 | -2.886890000 | -0.055956000 | -5.756260000 |
| 1 | -1.597344000 | 1.702430000  | -4.562935000 |
| 1 | -4.527627000 | -1.451443000 | -2.032023000 |
| 1 | -4.346540000 | -1.605313000 | -4.506025000 |
| 6 | -1.709641000 | 2.062384000  | -1.681624000 |
| 6 | -2.224522000 | 1.658647000  | -0.338785000 |
| 6 | -3.018791000 | 0.481634000  | -0.460568000 |
| 1 | -2.029423000 | -0.222818000 | -0.084993000 |
| 6 | -4.181318000 | 0.172601000  | 0.450080000  |
| 6 | -4.271533000 | -1.132113000 | 1.140004000  |
| 6 | -4.949782000 | -1.231286000 | 2.362514000  |
| 6 | -3.708325000 | -2.293285000 | 0.596719000  |
| 6 | -5.093331000 | -2.454032000 | 3.002585000  |
| 1 | -5.347543000 | -0.329494000 | 2.825040000  |
| 6 | -3.856014000 | -3.516879000 | 1.236989000  |
| 1 | -3.137591000 | -2.246258000 | -0.327561000 |
| 6 | -4.552405000 | -3.604424000 | 2.436818000  |
| 1 | -5.619061000 | -2.507022000 | 3.953118000  |
| 1 | -3.413492000 | -4.405738000 | 0.794623000  |
| 1 | -4.660371000 | -4.563499000 | 2.937756000  |
| 6 | -5.150853000 | 1.092062000  | 0.542150000  |



|    |              |              |              |
|----|--------------|--------------|--------------|
| 1  | -5.070092000 | 2.050867000  | 0.035325000  |
| 1  | -2.018118000 | 3.102133000  | -1.880512000 |
| 1  | -6.063522000 | 0.907601000  | 1.102666000  |
| 16 | 2.271105000  | 2.556918000  | 0.017013000  |
| 8  | 1.686873000  | 2.990188000  | -1.245949000 |
| 8  | 1.214812000  | 1.596918000  | 0.731714000  |
| 8  | 2.680461000  | 3.528620000  | 1.011588000  |
| 1  | -0.608537000 | 2.066190000  | -1.705011000 |
| 6  | 3.614684000  | 1.447661000  | -0.304736000 |
| 6  | 3.492942000  | 0.511138000  | -1.330831000 |
| 6  | 4.499560000  | -0.424932000 | -1.498962000 |
| 6  | 5.623199000  | -0.438455000 | -0.666358000 |
| 6  | 5.725274000  | 0.521637000  | 0.340474000  |
| 6  | 4.722461000  | 1.465410000  | 0.532276000  |
| 1  | 2.605725000  | 0.498250000  | -1.959968000 |
| 1  | 4.409389000  | -1.173744000 | -2.284981000 |
| 1  | 6.601156000  | 0.524385000  | 0.987902000  |
| 1  | 4.787376000  | 2.210729000  | 1.320371000  |
| 6  | 6.685520000  | -1.474766000 | -0.868045000 |
| 1  | 7.169306000  | -1.364768000 | -1.846178000 |
| 1  | 7.464300000  | -1.414994000 | -0.100661000 |
| 1  | 6.252230000  | -2.483377000 | -0.838422000 |
| 16 | -0.008214000 | -1.345104000 | -0.718123000 |
| 8  | -0.454173000 | -2.287032000 | -1.735667000 |
| 8  | -1.003232000 | -1.114739000 | 0.402809000  |
| 8  | 0.412189000  | -0.007323000 | -1.239655000 |
| 1  | 0.826878000  | 1.002065000  | 0.023914000  |
| 6  | 1.424035000  | -2.021007000 | 0.084386000  |
| 6  | 2.145799000  | -3.014443000 | -0.562907000 |
| 6  | 3.342162000  | -3.455143000 | -0.005462000 |
| 6  | 3.821800000  | -2.911346000 | 1.185858000  |
| 6  | 3.065770000  | -1.922282000 | 1.824713000  |
| 6  | 1.873285000  | -1.471499000 | 1.283973000  |
| 1  | 1.762145000  | -3.429048000 | -1.492200000 |
| 1  | 3.913914000  | -4.237480000 | -0.504048000 |
| 1  | 3.433149000  | -1.491837000 | 2.755640000  |
| 1  | 1.296606000  | -0.694711000 | 1.779645000  |
| 6  | 5.117799000  | -3.365376000 | 1.784761000  |
| 1  | 5.831567000  | -2.533029000 | 1.850497000  |
| 1  | 4.976425000  | -3.744153000 | 2.804002000  |
| 1  | 5.582112000  | -4.161084000 | 1.192773000  |
| 6  | -1.810249000 | 2.309446000  | 0.872991000  |
| 6  | -2.004100000 | 1.708741000  | 2.133081000  |
| 6  | -1.103385000 | 3.525119000  | 0.803543000  |

|                                              |              |             |                             |
|----------------------------------------------|--------------|-------------|-----------------------------|
| 6                                            | -1.505837000 | 2.309805000 | 3.274152000                 |
| 1                                            | -2.507288000 | 0.748251000 | 2.209098000                 |
| 6                                            | -0.622674000 | 4.129787000 | 1.950528000                 |
| 1                                            | -0.901616000 | 3.981778000 | -0.162747000                |
| 6                                            | -0.820523000 | 3.520578000 | 3.186105000                 |
| 1                                            | -1.639443000 | 1.828018000 | 4.238879000                 |
| 1                                            | -0.055167000 | 5.052630000 | 1.877710000                 |
| 1                                            | -0.423579000 | 3.983238000 | 4.086329000                 |
| Zero-point correction=                       |              |             | 0.621619 (Hartree/Particle) |
| Thermal correction to Energy=                |              |             | 0.661056                    |
| Thermal correction to Enthalpy=              |              |             | 0.662000                    |
| Thermal correction to Gibbs Free Energy=     |              |             | 0.550766                    |
| Sum of electronic and zero-point Energies=   |              |             | -2676.079468                |
| Sum of electronic and thermal Energies=      |              |             | -2676.040032                |
| Sum of electronic and thermal Enthalpies=    |              |             | -2676.039088                |
| Sum of electronic and thermal Free Energies= |              |             | -2676.150322                |

#### B-4f

|   |             |              |              |
|---|-------------|--------------|--------------|
| 6 | 3.541038000 | 0.016603000  | 4.691289000  |
| 6 | 2.668585000 | 0.895844000  | 4.047509000  |
| 6 | 2.728283000 | 1.009002000  | 2.669472000  |
| 6 | 3.653170000 | 0.250300000  | 1.933642000  |
| 6 | 4.536692000 | -0.613733000 | 2.575707000  |
| 6 | 4.467577000 | -0.726422000 | 3.961597000  |
| 1 | 3.502619000 | -0.084722000 | 5.773471000  |
| 1 | 1.956188000 | 1.485175000  | 4.622443000  |
| 1 | 5.270263000 | -1.181949000 | 2.005024000  |
| 1 | 5.146621000 | -1.398488000 | 4.481667000  |
| 6 | 1.964304000 | 1.879256000  | 1.724582000  |
| 6 | 2.531132000 | 1.521414000  | 0.374786000  |
| 6 | 3.501024000 | 0.577408000  | 0.516427000  |
| 1 | 1.401205000 | -2.088499000 | -1.265869000 |
| 6 | 4.367635000 | 0.000111000  | -0.539648000 |
| 6 | 4.036687000 | -1.342747000 | -1.069775000 |
| 6 | 4.324653000 | -1.685282000 | -2.397438000 |
| 6 | 3.387662000 | -2.293848000 | -0.268941000 |
| 6 | 4.011261000 | -2.942638000 | -2.897628000 |
| 1 | 4.768443000 | -0.938472000 | -3.053036000 |
| 6 | 3.079951000 | -3.558344000 | -0.769418000 |
| 1 | 3.120254000 | -2.044407000 | 0.756514000  |
| 6 | 3.393038000 | -3.889000000 | -2.085481000 |
| 1 | 4.235685000 | -3.179153000 | -3.935099000 |
| 1 | 2.574145000 | -4.273113000 | -0.124520000 |
| 1 | 3.141967000 | -4.870619000 | -2.479081000 |

|    |              |              |              |
|----|--------------|--------------|--------------|
| 6  | 5.432870000  | 0.685280000  | -0.971146000 |
| 1  | 5.648507000  | 1.676255000  | -0.580845000 |
| 1  | 2.099965000  | 2.946138000  | 1.957592000  |
| 1  | 6.122937000  | 0.279892000  | -1.708008000 |
| 16 | -1.999380000 | 2.737703000  | -0.188038000 |
| 8  | -1.077949000 | 2.991397000  | 0.906744000  |
| 8  | -1.266200000 | 1.777811000  | -1.250152000 |
| 8  | -2.578640000 | 3.813293000  | -0.962537000 |
| 1  | 0.878577000  | 1.705885000  | 1.749127000  |
| 6  | -3.308715000 | 1.713023000  | 0.426819000  |
| 6  | -3.029476000 | 0.790807000  | 1.433341000  |
| 6  | -4.044865000 | -0.036801000 | 1.883001000  |
| 6  | -5.336394000 | 0.052442000  | 1.353509000  |
| 6  | -5.589233000 | 0.991191000  | 0.352638000  |
| 6  | -4.580362000 | 1.824436000  | -0.119469000 |
| 1  | -2.024226000 | 0.724066000  | 1.843903000  |
| 1  | -3.837727000 | -0.773260000 | 2.658863000  |
| 1  | -6.593962000 | 1.072862000  | -0.060498000 |
| 1  | -4.767735000 | 2.565153000  | -0.892876000 |
| 6  | -6.415160000 | -0.852019000 | 1.865291000  |
| 1  | -6.635431000 | -0.650035000 | 2.920471000  |
| 1  | -7.347062000 | -0.734237000 | 1.302494000  |
| 1  | -6.105879000 | -1.903892000 | 1.800414000  |
| 16 | -0.186143000 | -1.582933000 | 0.055724000  |
| 8  | 0.391013000  | -2.541787000 | 0.978993000  |
| 8  | 0.477806000  | -1.775352000 | -1.394768000 |
| 8  | -0.124512000 | -0.160224000 | 0.386060000  |
| 1  | -0.575807000 | 1.252549000  | -0.783862000 |
| 6  | -1.856425000 | -2.015061000 | -0.305424000 |
| 6  | -2.426917000 | -3.082879000 | 0.374160000  |
| 6  | -3.765412000 | -3.382288000 | 0.143543000  |
| 6  | -4.522614000 | -2.635306000 | -0.758595000 |
| 6  | -3.913923000 | -1.568799000 | -1.430226000 |
| 6  | -2.587970000 | -1.242688000 | -1.206263000 |
| 1  | -1.827929000 | -3.659388000 | 1.073724000  |
| 1  | -4.231692000 | -4.211092000 | 0.674011000  |
| 1  | -4.503718000 | -0.969854000 | -2.122475000 |
| 1  | -2.134517000 | -0.392122000 | -1.711700000 |
| 6  | -5.961859000 | -2.954898000 | -1.020204000 |
| 1  | -6.580163000 | -2.049979000 | -0.964915000 |
| 1  | -6.096837000 | -3.373076000 | -2.025159000 |
| 1  | -6.354934000 | -3.681793000 | -0.302089000 |
| 6  | 2.038822000  | 2.134629000  | -0.859939000 |
| 6  | 2.021115000  | 1.431214000  | -2.074308000 |

|                                              |             |             |                             |
|----------------------------------------------|-------------|-------------|-----------------------------|
| 6                                            | 1.537489000 | 3.444065000 | -0.850120000                |
| 6                                            | 1.541773000 | 2.023428000 | -3.234321000                |
| 1                                            | 2.360918000 | 0.397673000 | -2.097328000                |
| 6                                            | 1.067798000 | 4.038805000 | -2.013583000                |
| 1                                            | 1.505917000 | 4.000754000 | 0.083439000                 |
| 6                                            | 1.070924000 | 3.332486000 | -3.211184000                |
| 1                                            | 1.526601000 | 1.453883000 | -4.160923000                |
| 1                                            | 0.677530000 | 5.052942000 | -1.978411000                |
| 1                                            | 0.690543000 | 3.793570000 | -4.119379000                |
| Zero-point correction=                       |             |             | 0.625869 (Hartree/Particle) |
| Thermal correction to Energy=                |             |             | 0.666471                    |
| Thermal correction to Enthalpy=              |             |             | 0.667415                    |
| Thermal correction to Gibbs Free Energy=     |             |             | 0.553570                    |
| Sum of electronic and zero-point Energies=   |             |             | -2676.113080                |
| Sum of electronic and thermal Energies=      |             |             | -2676.072477                |
| Sum of electronic and thermal Enthalpies=    |             |             | -2676.071533                |
| Sum of electronic and thermal Free Energies= |             |             | -2676.185378                |

#### **B-TSf5**

|   |              |              |              |
|---|--------------|--------------|--------------|
| 6 | 0.662447000  | 1.123422000  | 4.087029000  |
| 6 | 1.554571000  | 0.061435000  | 3.975021000  |
| 6 | 2.228390000  | -0.117794000 | 2.777126000  |
| 6 | 2.035807000  | 0.753648000  | 1.696632000  |
| 6 | 1.117701000  | 1.797130000  | 1.801923000  |
| 6 | 0.440602000  | 1.973416000  | 3.003177000  |
| 1 | 0.124042000  | 1.282568000  | 5.018571000  |
| 1 | 1.710805000  | -0.624586000 | 4.805741000  |
| 1 | 0.886309000  | 2.449943000  | 0.964347000  |
| 1 | -0.284644000 | 2.779984000  | 3.080931000  |
| 6 | 3.157830000  | -1.212342000 | 2.369806000  |
| 6 | 3.520747000  | -0.871990000 | 0.960042000  |
| 6 | 2.846270000  | 0.255656000  | 0.559804000  |
| 1 | 1.621974000  | -0.535239000 | -2.022344000 |
| 6 | 2.775417000  | 0.753890000  | -0.797044000 |
| 6 | 2.478010000  | 2.168442000  | -1.009082000 |
| 6 | 1.521004000  | 2.556788000  | -1.955189000 |
| 6 | 3.129873000  | 3.145866000  | -0.243919000 |
| 6 | 1.193699000  | 3.896941000  | -2.103386000 |
| 1 | 0.982843000  | 1.799231000  | -2.521306000 |
| 6 | 2.837044000  | 4.486427000  | -0.434435000 |
| 1 | 3.863331000  | 2.839385000  | 0.499864000  |
| 6 | 1.855865000  | 4.861302000  | -1.350586000 |
| 1 | 0.401392000  | 4.182633000  | -2.790311000 |
| 1 | 3.354205000  | 5.242249000  | 0.150617000  |

|    |              |              |              |
|----|--------------|--------------|--------------|
| 1  | 1.597192000  | 5.910552000  | -1.467294000 |
| 6  | 2.825078000  | -0.106399000 | -1.909293000 |
| 1  | 3.271976000  | -1.088866000 | -1.758259000 |
| 1  | 2.649732000  | -2.190922000 | 2.372088000  |
| 1  | 3.043131000  | 0.356807000  | -2.872018000 |
| 16 | -2.323941000 | 2.650827000  | -0.505976000 |
| 8  | -1.446372000 | 3.192935000  | 0.519230000  |
| 8  | -1.456921000 | 1.742647000  | -1.497016000 |
| 8  | -3.102235000 | 3.527359000  | -1.356774000 |
| 1  | 4.047839000  | -1.325827000 | 3.005022000  |
| 6  | -3.399270000 | 1.460259000  | 0.247953000  |
| 6  | -2.911768000 | 0.657624000  | 1.278504000  |
| 6  | -3.738509000 | -0.322244000 | 1.804424000  |
| 6  | -5.037961000 | -0.510286000 | 1.321289000  |
| 6  | -5.505562000 | 0.325237000  | 0.306386000  |
| 6  | -4.690435000 | 1.310025000  | -0.240255000 |
| 1  | -1.896246000 | 0.792787000  | 1.647807000  |
| 1  | -3.366439000 | -0.970643000 | 2.596716000  |
| 1  | -6.521672000 | 0.196911000  | -0.065509000 |
| 1  | -5.039998000 | 1.964781000  | -1.034805000 |
| 6  | -5.894522000 | -1.600734000 | 1.887134000  |
| 1  | -6.005138000 | -1.501060000 | 2.973404000  |
| 1  | -6.896252000 | -1.601870000 | 1.444978000  |
| 1  | -5.440932000 | -2.584106000 | 1.701586000  |
| 16 | -0.041957000 | -1.434452000 | -0.695804000 |
| 8  | 0.774665000  | -2.370755000 | 0.076128000  |
| 8  | 0.446629000  | -1.222160000 | -2.122598000 |
| 8  | -0.213618000 | -0.099948000 | -0.059757000 |
| 1  | -0.910042000 | 1.098315000  | -0.958019000 |
| 6  | -1.660701000 | -2.120124000 | -0.899261000 |
| 6  | -2.020423000 | -3.261642000 | -0.198100000 |
| 6  | -3.327251000 | -3.729245000 | -0.296010000 |
| 6  | -4.269350000 | -3.068226000 | -1.083460000 |
| 6  | -3.876196000 | -1.921748000 | -1.782426000 |
| 6  | -2.581746000 | -1.439632000 | -1.694644000 |
| 1  | -1.278757000 | -3.766763000 | 0.414933000  |
| 1  | -3.623227000 | -4.623867000 | 0.250770000  |
| 1  | -4.608026000 | -1.392903000 | -2.391800000 |
| 1  | -2.289703000 | -0.537094000 | -2.227827000 |
| 6  | -5.678018000 | -3.566064000 | -1.194402000 |
| 1  | -6.396027000 | -2.748066000 | -1.054771000 |
| 1  | -5.871485000 | -3.995556000 | -2.185211000 |
| 1  | -5.894241000 | -4.339336000 | -0.449664000 |
| 6  | 4.525418000  | -1.661803000 | 0.247788000  |

|                                              |             |              |                             |
|----------------------------------------------|-------------|--------------|-----------------------------|
| 6                                            | 4.389255000 | -3.052877000 | 0.170544000                 |
| 6                                            | 5.647803000 | -1.052718000 | -0.326790000                |
| 6                                            | 5.348632000 | -3.813532000 | -0.485184000                |
| 1                                            | 3.498737000 | -3.522818000 | 0.583250000                 |
| 6                                            | 6.609926000 | -1.819105000 | -0.969151000                |
| 1                                            | 5.758665000 | 0.028100000  | -0.254643000                |
| 6                                            | 6.461845000 | -3.200780000 | -1.051756000                |
| 1                                            | 5.223313000 | -4.890929000 | -0.558355000                |
| 1                                            | 7.480837000 | -1.336558000 | -1.406050000                |
| 1                                            | 7.214535000 | -3.799207000 | -1.558904000                |
| Zero-point correction=                       |             |              | 0.620664 (Hartree/Particle) |
| Thermal correction to Energy=                |             |              | 0.660426                    |
| Thermal correction to Enthalpy=              |             |              | 0.661370                    |
| Thermal correction to Gibbs Free Energy=     |             |              | 0.548251                    |
| Sum of electronic and zero-point Energies=   |             |              | -2676.095298                |
| Sum of electronic and thermal Energies=      |             |              | -2676.055537                |
| Sum of electronic and thermal Enthalpies=    |             |              | -2676.054592                |
| Sum of electronic and thermal Free Energies= |             |              | -2676.167711                |

### B-TSg3

|   |              |              |              |
|---|--------------|--------------|--------------|
| 6 | -3.645732000 | 4.985126000  | -1.301514000 |
| 6 | -3.718008000 | 4.421873000  | -0.044288000 |
| 6 | -3.387772000 | 3.062561000  | 0.084915000  |
| 6 | -2.997778000 | 2.286043000  | -1.029467000 |
| 6 | -2.896507000 | 2.873016000  | -2.280188000 |
| 6 | -3.231078000 | 4.216611000  | -2.402511000 |
| 1 | -3.892665000 | 6.033147000  | -1.446117000 |
| 1 | -4.011005000 | 5.007619000  | 0.823583000  |
| 1 | -2.565798000 | 2.295040000  | -3.138839000 |
| 1 | -3.166458000 | 4.691898000  | -3.378461000 |
| 6 | -3.273509000 | 2.253887000  | 1.238292000  |
| 6 | -2.690939000 | 1.003006000  | 0.934807000  |
| 6 | -2.743202000 | 0.875218000  | -0.617899000 |
| 1 | -1.780884000 | 0.516796000  | -1.012538000 |
| 6 | -3.846433000 | -0.100363000 | -1.021246000 |
| 6 | -3.533779000 | -1.545019000 | -0.934991000 |
| 6 | -4.476896000 | -2.426731000 | -0.393418000 |
| 6 | -2.310949000 | -2.062816000 | -1.373335000 |
| 6 | -4.208526000 | -3.785135000 | -0.302948000 |
| 1 | -5.411540000 | -2.026714000 | -0.004174000 |
| 6 | -2.042461000 | -3.423169000 | -1.286444000 |
| 1 | -1.546316000 | -1.408213000 | -1.788135000 |
| 6 | -2.990323000 | -4.287412000 | -0.750251000 |
| 1 | -4.948333000 | -4.453075000 | 0.132713000  |

|    |              |              |              |
|----|--------------|--------------|--------------|
| 1  | -1.084022000 | -3.805489000 | -1.632205000 |
| 1  | -2.773516000 | -5.349843000 | -0.670931000 |
| 6  | -5.061798000 | 0.325884000  | -1.382087000 |
| 1  | -5.323228000 | 1.379729000  | -1.431460000 |
| 1  | -3.482970000 | 2.588142000  | 2.254109000  |
| 1  | -5.832605000 | -0.386220000 | -1.665230000 |
| 16 | 0.627614000  | 1.734672000  | -0.254144000 |
| 8  | 0.422963000  | 2.336155000  | -1.569818000 |
| 8  | 0.562013000  | 0.244962000  | -0.243644000 |
| 8  | -0.279564000 | 2.264390000  | 0.825399000  |
| 1  | -1.578776000 | 1.499605000  | 1.053176000  |
| 6  | 2.257229000  | 2.175550000  | 0.298487000  |
| 6  | 3.200768000  | 2.594394000  | -0.628969000 |
| 6  | 4.494242000  | 2.877600000  | -0.201430000 |
| 6  | 4.850254000  | 2.752948000  | 1.140693000  |
| 6  | 3.875882000  | 2.341918000  | 2.058490000  |
| 6  | 2.585562000  | 2.047100000  | 1.646065000  |
| 1  | 2.909919000  | 2.700300000  | -1.671043000 |
| 1  | 5.240940000  | 3.207593000  | -0.922507000 |
| 1  | 4.141839000  | 2.251410000  | 3.111260000  |
| 1  | 1.825961000  | 1.731015000  | 2.357197000  |
| 6  | 6.251232000  | 3.018734000  | 1.601483000  |
| 1  | 6.270587000  | 3.694085000  | 2.464546000  |
| 1  | 6.744413000  | 2.088201000  | 1.915154000  |
| 1  | 6.860161000  | 3.464044000  | 0.808214000  |
| 16 | 1.518427000  | -2.921643000 | -0.636585000 |
| 8  | 1.540109000  | -4.213484000 | -1.293745000 |
| 8  | 0.848109000  | -2.750092000 | 0.643519000  |
| 8  | 0.894888000  | -1.911186000 | -1.703593000 |
| 1  | 0.775230000  | -1.019281000 | -1.269560000 |
| 6  | 3.172502000  | -2.310788000 | -0.482781000 |
| 6  | 4.157805000  | -2.786030000 | -1.338721000 |
| 6  | 5.429115000  | -2.228535000 | -1.273552000 |
| 6  | 5.717157000  | -1.203941000 | -0.371286000 |
| 6  | 4.708808000  | -0.758027000 | 0.487717000  |
| 6  | 3.435313000  | -1.301356000 | 0.438475000  |
| 1  | 3.920671000  | -3.580715000 | -2.041229000 |
| 1  | 6.211247000  | -2.588232000 | -1.940168000 |
| 1  | 4.919740000  | 0.046707000  | 1.192343000  |
| 1  | 2.640927000  | -0.947386000 | 1.091748000  |
| 6  | 7.072789000  | -0.567819000 | -0.319508000 |
| 1  | 7.519021000  | -0.658074000 | 0.678653000  |
| 1  | 7.763141000  | -1.019134000 | -1.038850000 |
| 1  | 7.006298000  | 0.505125000  | -0.543778000 |

|                                              |              |              |                             |
|----------------------------------------------|--------------|--------------|-----------------------------|
| 6                                            | -2.785200000 | -0.187488000 | 1.816077000                 |
| 6                                            | -1.772438000 | -1.149850000 | 1.777690000                 |
| 6                                            | -3.900193000 | -0.390550000 | 2.632962000                 |
| 6                                            | -1.875156000 | -2.300993000 | 2.546477000                 |
| 1                                            | -0.905121000 | -1.008147000 | 1.134533000                 |
| 6                                            | -3.994993000 | -1.537879000 | 3.411295000                 |
| 1                                            | -4.711942000 | 0.337241000  | 2.627193000                 |
| 6                                            | -2.984315000 | -2.494224000 | 3.365783000                 |
| 1                                            | -1.087277000 | -3.047258000 | 2.476980000                 |
| 1                                            | -4.868705000 | -1.695606000 | 4.039442000                 |
| 1                                            | -3.067777000 | -3.398780000 | 3.963880000                 |
| Zero-point correction=                       |              |              | 0.621652 (Hartree/Particle) |
| Thermal correction to Energy=                |              |              | 0.661365                    |
| Thermal correction to Enthalpy=              |              |              | 0.662309                    |
| Thermal correction to Gibbs Free Energy=     |              |              | 0.549381                    |
| Sum of electronic and zero-point Energies=   |              |              | -2676.071095                |
| Sum of electronic and thermal Energies=      |              |              | -2676.031382                |
| Sum of electronic and thermal Enthalpies=    |              |              | -2676.030438                |
| Sum of electronic and thermal Free Energies= |              |              | -2676.143366                |

### B-3g

|   |              |              |              |
|---|--------------|--------------|--------------|
| 6 | -0.426055000 | 4.572615000  | -0.889149000 |
| 6 | -0.969166000 | 4.120688000  | 0.283565000  |
| 6 | -1.577871000 | 2.840189000  | 0.276524000  |
| 6 | -1.654456000 | 2.053792000  | -0.909473000 |
| 6 | -1.073063000 | 2.516468000  | -2.075652000 |
| 6 | -0.459231000 | 3.762832000  | -2.046646000 |
| 1 | 0.091734000  | 5.525917000  | -0.926516000 |
| 1 | -0.895562000 | 4.692745000  | 1.204353000  |
| 1 | -1.074136000 | 1.910400000  | -2.976993000 |
| 1 | 0.031697000  | 4.129946000  | -2.944098000 |
| 6 | -2.015667000 | 2.060406000  | 1.331503000  |
| 6 | -2.331957000 | 0.699770000  | 0.920482000  |
| 6 | -2.360785000 | 0.770113000  | -0.648726000 |
| 1 | -1.783902000 | -0.061350000 | -1.079519000 |
| 6 | -3.780621000 | 0.724650000  | -1.195242000 |
| 6 | -4.440045000 | -0.601383000 | -1.237605000 |
| 6 | -5.802672000 | -0.705235000 | -0.929416000 |
| 6 | -3.738140000 | -1.767773000 | -1.563746000 |
| 6 | -6.447886000 | -1.933034000 | -0.952134000 |
| 1 | -6.344718000 | 0.185114000  | -0.615051000 |
| 6 | -4.389670000 | -2.995718000 | -1.591449000 |
| 1 | -2.672087000 | -1.740154000 | -1.780279000 |
| 6 | -5.742654000 | -3.085075000 | -1.286268000 |



|    |              |              |              |
|----|--------------|--------------|--------------|
| 1  | -7.502033000 | -1.992439000 | -0.690699000 |
| 1  | -3.824570000 | -3.889211000 | -1.845325000 |
| 1  | -6.244239000 | -4.050071000 | -1.296926000 |
| 6  | -4.419676000 | 1.834305000  | -1.585128000 |
| 1  | -3.962765000 | 2.819793000  | -1.542141000 |
| 1  | -2.033424000 | 2.379611000  | 2.373567000  |
| 1  | -5.425920000 | 1.783207000  | -1.992403000 |
| 16 | 0.432343000  | -1.347440000 | -0.218113000 |
| 8  | 0.085718000  | -1.120914000 | 1.205302000  |
| 8  | 0.777961000  | -0.051408000 | -0.902741000 |
| 8  | -0.561685000 | -2.108059000 | -0.987783000 |
| 1  | -1.368047000 | 0.163245000  | 1.163022000  |
| 6  | 1.933833000  | -2.300896000 | -0.217150000 |
| 6  | 2.679198000  | -2.436347000 | 0.944877000  |
| 6  | 3.872019000  | -3.152589000 | 0.906913000  |
| 6  | 4.330695000  | -3.723798000 | -0.279180000 |
| 6  | 3.560495000  | -3.571670000 | -1.438582000 |
| 6  | 2.367060000  | -2.867128000 | -1.413987000 |
| 1  | 2.315592000  | -1.985791000 | 1.864629000  |
| 1  | 4.458158000  | -3.271436000 | 1.817975000  |
| 1  | 3.905201000  | -4.022170000 | -2.368962000 |
| 1  | 1.757470000  | -2.761820000 | -2.308556000 |
| 6  | 5.627203000  | -4.474682000 | -0.331123000 |
| 1  | 5.500795000  | -5.463480000 | -0.787552000 |
| 1  | 6.372278000  | -3.939754000 | -0.935496000 |
| 1  | 6.051978000  | -4.617455000 | 0.668203000  |
| 16 | 2.460621000  | 2.774615000  | 0.058705000  |
| 8  | 2.625300000  | 3.923937000  | 0.930010000  |
| 8  | 2.227182000  | 2.971812000  | -1.366963000 |
| 8  | 1.265573000  | 1.926571000  | 0.670226000  |
| 1  | 1.073092000  | 1.125036000  | 0.071534000  |
| 6  | 3.848784000  | 1.692723000  | 0.236042000  |
| 6  | 4.751593000  | 1.903839000  | 1.269275000  |
| 6  | 5.821352000  | 1.028939000  | 1.414880000  |
| 6  | 5.989433000  | -0.049114000 | 0.546002000  |
| 6  | 5.069004000  | -0.230178000 | -0.491128000 |
| 6  | 3.997581000  | 0.632421000  | -0.655971000 |
| 1  | 4.611887000  | 2.748057000  | 1.938745000  |
| 1  | 6.540284000  | 1.183300000  | 2.217929000  |
| 1  | 5.187307000  | -1.076608000 | -1.167872000 |
| 1  | 3.273589000  | 0.486722000  | -1.455239000 |
| 6  | 7.114332000  | -1.021316000 | 0.725556000  |
| 1  | 7.619891000  | -1.229506000 | -0.224729000 |
| 1  | 7.861403000  | -0.653719000 | 1.436092000  |

|                                              |              |              |                             |
|----------------------------------------------|--------------|--------------|-----------------------------|
| 1                                            | 6.738198000  | -1.981985000 | 1.103774000                 |
| 6                                            | -3.418069000 | -0.027406000 | 1.649055000                 |
| 6                                            | -3.301760000 | -1.405904000 | 1.838203000                 |
| 6                                            | -4.559896000 | 0.638592000  | 2.095575000                 |
| 6                                            | -4.326809000 | -2.108119000 | 2.457351000                 |
| 1                                            | -2.404767000 | -1.912650000 | 1.480884000                 |
| 6                                            | -5.576924000 | -0.063967000 | 2.731322000                 |
| 1                                            | -4.664484000 | 1.709186000  | 1.911989000                 |
| 6                                            | -5.461562000 | -1.438938000 | 2.908763000                 |
| 1                                            | -4.239251000 | -3.183602000 | 2.589270000                 |
| 1                                            | -6.465143000 | 0.459752000  | 3.076998000                 |
| 1                                            | -6.261019000 | -1.991590000 | 3.396686000                 |
| Zero-point correction=                       |              |              | 0.624199 (Hartree/Particle) |
| Thermal correction to Energy=                |              |              | 0.664479                    |
| Thermal correction to Enthalpy=              |              |              | 0.665423                    |
| Thermal correction to Gibbs Free Energy=     |              |              | 0.551116                    |
| Sum of electronic and zero-point Energies=   |              |              | -2676.076385                |
| Sum of electronic and thermal Energies=      |              |              | -2676.036105                |
| Sum of electronic and thermal Enthalpies=    |              |              | -2676.035161                |
| Sum of electronic and thermal Free Energies= |              |              | -2676.149468                |

### B-TSd3'

|   |              |              |              |
|---|--------------|--------------|--------------|
| 6 | 0.551927000  | 4.779865000  | -0.413490000 |
| 6 | -0.829340000 | 4.628818000  | -0.492025000 |
| 6 | -1.372269000 | 3.372865000  | -0.242652000 |
| 6 | -0.546434000 | 2.285049000  | 0.084633000  |
| 6 | 0.828150000  | 2.436737000  | 0.159773000  |
| 6 | 1.369596000  | 3.697470000  | -0.092227000 |
| 1 | 0.999084000  | 5.752743000  | -0.604428000 |
| 1 | -1.469458000 | 5.472197000  | -0.742554000 |
| 1 | 1.457209000  | 1.584913000  | 0.406235000  |
| 1 | 2.446851000  | 3.834242000  | -0.037067000 |
| 6 | -2.751633000 | 2.914711000  | -0.240800000 |
| 6 | -2.822355000 | 1.609798000  | 0.081534000  |
| 6 | -1.400691000 | 1.061224000  | 0.314000000  |
| 1 | -1.277337000 | 0.698254000  | 1.344003000  |
| 6 | -1.180512000 | -0.067036000 | -0.654564000 |
| 6 | -4.048426000 | 0.803097000  | 0.230503000  |
| 6 | -4.639021000 | 0.654135000  | 1.489136000  |
| 6 | -4.616940000 | 0.147745000  | -0.864218000 |
| 6 | -5.761528000 | -0.148995000 | 1.652672000  |
| 1 | -4.200044000 | 1.169171000  | 2.342983000  |
| 6 | -5.740830000 | -0.653819000 | -0.701254000 |
| 1 | -4.162307000 | 0.264897000  | -1.847197000 |

|                                            |              |              |                             |
|--------------------------------------------|--------------|--------------|-----------------------------|
| 6                                          | -6.311308000 | -0.808593000 | 0.557783000                 |
| 1                                          | -6.209918000 | -0.258532000 | 2.637385000                 |
| 1                                          | -6.171585000 | -1.161607000 | -1.560853000                |
| 6                                          | -1.506565000 | -1.431023000 | -0.283532000                |
| 6                                          | -2.207727000 | -1.725441000 | 0.899141000                 |
| 6                                          | -1.097360000 | -2.504838000 | -1.097962000                |
| 6                                          | -2.548712000 | -3.027902000 | 1.218025000                 |
| 1                                          | -2.518622000 | -0.928489000 | 1.565385000                 |
| 6                                          | -1.402947000 | -3.809292000 | -0.755118000                |
| 1                                          | -0.479933000 | -2.322250000 | -1.973000000                |
| 6                                          | -2.145269000 | -4.073467000 | 0.392535000                 |
| 1                                          | -3.116368000 | -3.229720000 | 2.122436000                 |
| 1                                          | -1.047855000 | -4.625024000 | -1.377921000                |
| 1                                          | -2.393902000 | -5.099262000 | 0.653792000                 |
| 6                                          | -0.660835000 | 0.232784000  | -1.927830000                |
| 1                                          | -0.619076000 | 1.289246000  | -2.193784000                |
| 1                                          | -3.614817000 | 3.544195000  | -0.441500000                |
| 1                                          | -0.953816000 | -0.426270000 | -2.745682000                |
| 1                                          | -7.187320000 | -1.439762000 | 0.685163000                 |
| 16                                         | 2.060487000  | -1.303055000 | -0.300462000                |
| 8                                          | 2.059608000  | -2.763392000 | -0.323882000                |
| 8                                          | 1.179042000  | -0.662679000 | 0.699372000                 |
| 8                                          | 1.801961000  | -0.714313000 | -1.683595000                |
| 1                                          | 0.530258000  | -0.122828000 | -1.767138000                |
| 6                                          | 3.719884000  | -0.778098000 | 0.064576000                 |
| 6                                          | 4.755530000  | -1.165347000 | -0.783156000                |
| 6                                          | 6.052771000  | -0.778792000 | -0.489884000                |
| 6                                          | 6.338696000  | -0.012499000 | 0.646150000                 |
| 6                                          | 5.286605000  | 0.360196000  | 1.479838000                 |
| 6                                          | 3.977745000  | -0.019330000 | 1.196518000                 |
| 1                                          | 4.535207000  | -1.763281000 | -1.664687000                |
| 1                                          | 6.867990000  | -1.075107000 | -1.149329000                |
| 1                                          | 5.496705000  | 0.954431000  | 2.368215000                 |
| 1                                          | 3.152179000  | 0.258783000  | 1.847196000                 |
| 6                                          | 7.751725000  | 0.380208000  | 0.955271000                 |
| 1                                          | 7.801765000  | 1.065746000  | 1.807167000                 |
| 1                                          | 8.363183000  | -0.497500000 | 1.198902000                 |
| 1                                          | 8.227670000  | 0.871372000  | 0.098242000                 |
| Zero-point correction=                     |              |              | 0.475273 (Hartree/Particle) |
| Thermal correction to Energy=              |              |              | 0.504223                    |
| Thermal correction to Enthalpy=            |              |              | 0.505168                    |
| Thermal correction to Gibbs Free Energy=   |              |              | 0.413295                    |
| Sum of electronic and zero-point Energies= |              |              | -1781.146447                |
| Sum of electronic and thermal Energies=    |              |              | -1781.117496                |

Sum of electronic and thermal Enthalpies= -1781.116552  
 Sum of electronic and thermal Free Energies= -1781.208424

**B-3d'**

|    |              |              |              |
|----|--------------|--------------|--------------|
| 6  | 2.372094000  | 3.573492000  | 2.457052000  |
| 6  | 1.725570000  | 2.442769000  | 2.949132000  |
| 6  | 0.686197000  | 1.886055000  | 2.215280000  |
| 6  | 0.268999000  | 2.444644000  | 0.978961000  |
| 6  | 0.924357000  | 3.583993000  | 0.505852000  |
| 6  | 1.973544000  | 4.136168000  | 1.248456000  |
| 1  | 3.195746000  | 4.014265000  | 3.012970000  |
| 1  | 2.034624000  | 1.992119000  | 3.890251000  |
| 1  | 0.661086000  | 4.045760000  | -0.438676000 |
| 1  | 2.490399000  | 5.011327000  | 0.862835000  |
| 6  | -0.098580000 | 0.696549000  | 2.457945000  |
| 6  | -0.966628000 | 0.494391000  | 1.430689000  |
| 6  | -0.837709000 | 1.612303000  | 0.465947000  |
| 1  | 2.320712000  | 1.985860000  | -0.255838000 |
| 6  | -1.592194000 | 1.858074000  | -0.642077000 |
| 6  | -2.787133000 | 1.067011000  | -0.992609000 |
| 6  | -3.829132000 | 0.866786000  | -0.083334000 |
| 6  | -2.893399000 | 0.516621000  | -2.275959000 |
| 6  | -4.937394000 | 0.108336000  | -0.436576000 |
| 1  | -3.759701000 | 1.309388000  | 0.908570000  |
| 6  | -3.995275000 | -0.251570000 | -2.623910000 |
| 1  | -2.074808000 | 0.659263000  | -2.981218000 |
| 6  | -5.020724000 | -0.457368000 | -1.704531000 |
| 1  | -5.736537000 | -0.045022000 | 0.284814000  |
| 1  | -4.055019000 | -0.693671000 | -3.615669000 |
| 1  | -5.886768000 | -1.055043000 | -1.978862000 |
| 6  | -1.259037000 | 2.957478000  | -1.607667000 |
| 1  | -0.269216000 | 2.795968000  | -2.054689000 |
| 1  | 0.056124000  | 0.006473000  | 3.283499000  |
| 1  | -1.996313000 | 3.007503000  | -2.412407000 |
| 16 | 2.487229000  | 0.453321000  | -1.741777000 |
| 8  | 3.064185000  | 1.480028000  | -0.644329000 |
| 8  | 3.390824000  | 0.474588000  | -2.870565000 |
| 8  | 1.070153000  | 0.756075000  | -1.905572000 |
| 1  | -1.257672000 | 3.934170000  | -1.108915000 |
| 6  | 2.647139000  | -1.099318000 | -0.914514000 |
| 6  | 1.846156000  | -1.348096000 | 0.195704000  |
| 6  | 1.941060000  | -2.573563000 | 0.832343000  |
| 6  | 2.829681000  | -3.553046000 | 0.374625000  |
| 6  | 3.627184000  | -3.270919000 | -0.735106000 |

|                                              |              |              |                             |
|----------------------------------------------|--------------|--------------|-----------------------------|
| 6                                            | 3.543039000  | -2.046873000 | -1.389122000                |
| 1                                            | 1.153519000  | -0.590377000 | 0.558333000                 |
| 1                                            | 1.309039000  | -2.777844000 | 1.696510000                 |
| 1                                            | 4.324526000  | -4.025469000 | -1.095063000                |
| 1                                            | 4.156233000  | -1.818250000 | -2.256740000                |
| 6                                            | 2.901757000  | -4.884177000 | 1.057556000                 |
| 1                                            | 3.785207000  | -5.450385000 | 0.746866000                 |
| 1                                            | 2.933356000  | -4.772998000 | 2.147085000                 |
| 1                                            | 2.018936000  | -5.492299000 | 0.824264000                 |
| 6                                            | -1.726657000 | -0.759402000 | 1.291607000                 |
| 6                                            | -1.606100000 | -1.548576000 | 0.141061000                 |
| 6                                            | -2.519413000 | -1.222755000 | 2.344898000                 |
| 6                                            | -2.284537000 | -2.754932000 | 0.040154000                 |
| 1                                            | -0.976240000 | -1.202039000 | -0.678210000                |
| 6                                            | -3.202198000 | -2.429231000 | 2.240439000                 |
| 1                                            | -2.614479000 | -0.611044000 | 3.241042000                 |
| 6                                            | -3.092168000 | -3.195843000 | 1.085703000                 |
| 1                                            | -2.183876000 | -3.354234000 | -0.861811000                |
| 1                                            | -3.826651000 | -2.768878000 | 3.063896000                 |
| 1                                            | -3.630182000 | -4.137193000 | 1.001317000                 |
| Zero-point correction=                       |              |              | 0.479406 (Hartree/Particle) |
| Thermal correction to Energy=                |              |              | 0.509495                    |
| Thermal correction to Enthalpy=              |              |              | 0.510440                    |
| Thermal correction to Gibbs Free Energy=     |              |              | 0.417420                    |
| Sum of electronic and zero-point Energies=   |              |              | -1781.192305                |
| Sum of electronic and thermal Energies=      |              |              | -1781.162216                |
| Sum of electronic and thermal Enthalpies=    |              |              | -1781.161272                |
| Sum of electronic and thermal Free Energies= |              |              | -1781.254292                |

#### B-TSd4'

|   |              |              |              |
|---|--------------|--------------|--------------|
| 6 | -4.061157000 | 3.739830000  | 0.793520000  |
| 6 | -3.172717000 | 3.061688000  | 1.622303000  |
| 6 | -2.639552000 | 1.862449000  | 1.179721000  |
| 6 | -2.953408000 | 1.339443000  | -0.085870000 |
| 6 | -3.849492000 | 2.025365000  | -0.906156000 |
| 6 | -4.397544000 | 3.221691000  | -0.455608000 |
| 1 | -4.495500000 | 4.680831000  | 1.121868000  |
| 1 | -2.900374000 | 3.462691000  | 2.595805000  |
| 1 | -4.140391000 | 1.644430000  | -1.880276000 |
| 1 | -5.095874000 | 3.760678000  | -1.091008000 |
| 6 | -1.651956000 | 0.965127000  | 1.810153000  |
| 6 | -1.569104000 | -0.204130000 | 0.991640000  |
| 6 | -2.271180000 | 0.042696000  | -0.234560000 |
| 1 | -0.581352000 | 1.464833000  | 1.505470000  |

|    |              |              |              |
|----|--------------|--------------|--------------|
| 6  | -2.090756000 | -0.671758000 | -1.407510000 |
| 6  | -1.664223000 | -2.068423000 | -1.426628000 |
| 6  | -2.251947000 | -3.002428000 | -0.562334000 |
| 6  | -0.665393000 | -2.496958000 | -2.313473000 |
| 6  | -1.841811000 | -4.326947000 | -0.573426000 |
| 1  | -3.043519000 | -2.675287000 | 0.108682000  |
| 6  | -0.239775000 | -3.816004000 | -2.303231000 |
| 1  | -0.172534000 | -1.770075000 | -2.956210000 |
| 6  | -0.829375000 | -4.733914000 | -1.437706000 |
| 1  | -2.310001000 | -5.043589000 | 0.096323000  |
| 1  | 0.558861000  | -4.130313000 | -2.970104000 |
| 1  | -0.501246000 | -5.770372000 | -1.439658000 |
| 6  | -2.331515000 | -0.016670000 | -2.722005000 |
| 1  | -2.046978000 | 1.039470000  | -2.694154000 |
| 1  | -1.547818000 | 0.867787000  | 2.893917000  |
| 1  | -1.783979000 | -0.524291000 | -3.519974000 |
| 16 | 1.051496000  | 2.130183000  | -0.288630000 |
| 8  | 0.632616000  | 2.264904000  | 1.158125000  |
| 8  | 1.058698000  | 3.389900000  | -1.024920000 |
| 8  | 0.308266000  | 1.019270000  | -0.933460000 |
| 1  | -3.395671000 | -0.089271000 | -2.989230000 |
| 6  | 2.747073000  | 1.582562000  | -0.187178000 |
| 6  | 3.122205000  | 0.638636000  | 0.762846000  |
| 6  | 4.424242000  | 0.156103000  | 0.772999000  |
| 6  | 5.366736000  | 0.609900000  | -0.152279000 |
| 6  | 4.973001000  | 1.570552000  | -1.086089000 |
| 6  | 3.671851000  | 2.055888000  | -1.110547000 |
| 1  | 2.396907000  | 0.298009000  | 1.499009000  |
| 1  | 4.722080000  | -0.579507000 | 1.520058000  |
| 1  | 5.703275000  | 1.946616000  | -1.802194000 |
| 1  | 3.359826000  | 2.811971000  | -1.826694000 |
| 6  | 6.766530000  | 0.072806000  | -0.153727000 |
| 1  | 7.500473000  | 0.863980000  | -0.343759000 |
| 1  | 7.017356000  | -0.398229000 | 0.802562000  |
| 1  | 6.902676000  | -0.684279000 | -0.936886000 |
| 6  | -0.708741000 | -1.317902000 | 1.416484000  |
| 6  | 0.484182000  | -1.635023000 | 0.757517000  |
| 6  | -1.071764000 | -2.026449000 | 2.566486000  |
| 6  | 1.279106000  | -2.668532000 | 1.234716000  |
| 1  | 0.779942000  | -1.041549000 | -0.105982000 |
| 6  | -0.283811000 | -3.076424000 | 3.021073000  |
| 1  | -1.990371000 | -1.764389000 | 3.089753000  |
| 6  | 0.892888000  | -3.400239000 | 2.354485000  |
| 1  | 2.214567000  | -2.896014000 | 0.727514000  |

|                                              |              |              |                             |
|----------------------------------------------|--------------|--------------|-----------------------------|
| 1                                            | -0.583715000 | -3.633564000 | 3.905294000                 |
| 1                                            | 1.517225000  | -4.213705000 | 2.716288000                 |
| Zero-point correction=                       |              |              | 0.475717 (Hartree/Particle) |
| Thermal correction to Energy=                |              |              | 0.504736                    |
| Thermal correction to Enthalpy=              |              |              | 0.505680                    |
| Thermal correction to Gibbs Free Energy=     |              |              | 0.414683                    |
| Sum of electronic and zero-point Energies=   |              |              | -1781.152745                |
| Sum of electronic and thermal Energies=      |              |              | -1781.123726                |
| Sum of electronic and thermal Enthalpies=    |              |              | -1781.122782                |
| Sum of electronic and thermal Free Energies= |              |              | -1781.213779                |

**B-4d'**

|    |              |              |              |
|----|--------------|--------------|--------------|
| 6  | 0.275077000  | 5.050983000  | -0.541725000 |
| 6  | 0.238576000  | 3.959327000  | -1.404214000 |
| 6  | -0.523138000 | 2.857164000  | -1.057330000 |
| 6  | -1.247364000 | 2.817814000  | 0.146068000  |
| 6  | -1.188478000 | 3.909047000  | 1.014687000  |
| 6  | -0.431683000 | 5.020096000  | 0.657336000  |
| 1  | 0.863580000  | 5.927692000  | -0.800628000 |
| 1  | 0.804105000  | 3.964668000  | -2.333476000 |
| 1  | -1.710898000 | 3.920375000  | 1.965624000  |
| 1  | -0.390842000 | 5.873480000  | 1.329740000  |
| 6  | -0.696573000 | 1.577203000  | -1.795659000 |
| 6  | -1.611521000 | 0.787381000  | -0.947422000 |
| 6  | -1.886812000 | 1.488359000  | 0.253207000  |
| 1  | -1.083964000 | 1.678377000  | -2.818756000 |
| 6  | -2.608556000 | 0.983677000  | 1.345976000  |
| 6  | -2.662651000 | -0.432819000 | 1.645938000  |
| 6  | -1.537591000 | -1.232911000 | 1.372335000  |
| 6  | -3.809296000 | -1.032665000 | 2.205209000  |
| 6  | -1.576327000 | -2.600138000 | 1.595143000  |
| 1  | -0.615009000 | -0.772116000 | 1.019279000  |
| 6  | -3.843554000 | -2.398449000 | 2.414934000  |
| 1  | -4.699461000 | -0.439586000 | 2.406243000  |
| 6  | -2.729498000 | -3.185069000 | 2.105832000  |
| 1  | -0.689396000 | -3.179814000 | 1.350288000  |
| 1  | -4.743467000 | -2.861719000 | 2.811537000  |
| 1  | -2.768144000 | -4.258922000 | 2.273949000  |
| 6  | -3.243183000 | 1.923894000  | 2.308469000  |
| 1  | -3.601850000 | 2.839125000  | 1.829473000  |
| 1  | 0.257123000  | 1.001272000  | -1.892919000 |
| 1  | -4.057239000 | 1.448782000  | 2.861032000  |
| 16 | 1.658278000  | -0.793781000 | -0.426875000 |
| 8  | 1.608270000  | -0.446189000 | -1.875862000 |

|                                              |              |              |                             |
|----------------------------------------------|--------------|--------------|-----------------------------|
| 8                                            | 1.159230000  | -2.148996000 | -0.127055000                |
| 8                                            | 1.033465000  | 0.271525000  | 0.400539000                 |
| 1                                            | -2.494576000 | 2.210282000  | 3.062674000                 |
| 6                                            | 3.389220000  | -0.780022000 | 0.000504000                 |
| 6                                            | 4.071396000  | 0.434565000  | 0.009145000                 |
| 6                                            | 5.425019000  | 0.455888000  | 0.303098000                 |
| 6                                            | 6.117180000  | -0.725000000 | 0.593902000                 |
| 6                                            | 5.414179000  | -1.927948000 | 0.582727000                 |
| 6                                            | 4.054546000  | -1.962239000 | 0.287126000                 |
| 1                                            | 3.529276000  | 1.352559000  | -0.208022000                |
| 1                                            | 5.964402000  | 1.403076000  | 0.311286000                 |
| 1                                            | 5.942177000  | -2.853800000 | 0.809130000                 |
| 1                                            | 3.497011000  | -2.894993000 | 0.277127000                 |
| 6                                            | 7.580324000  | -0.682367000 | 0.918625000                 |
| 1                                            | 8.000629000  | -1.688670000 | 1.016416000                 |
| 1                                            | 8.147108000  | -0.155647000 | 0.141362000                 |
| 1                                            | 7.765846000  | -0.152579000 | 1.861552000                 |
| 6                                            | -2.235358000 | -0.415455000 | -1.467084000                |
| 6                                            | -3.604812000 | -0.664424000 | -1.276869000                |
| 6                                            | -1.461980000 | -1.331522000 | -2.199241000                |
| 6                                            | -4.180675000 | -1.820885000 | -1.771436000                |
| 1                                            | -4.214848000 | 0.070824000  | -0.756230000                |
| 6                                            | -2.044681000 | -2.503584000 | -2.661714000                |
| 1                                            | -0.392884000 | -1.158294000 | -2.333136000                |
| 6                                            | -3.396487000 | -2.751544000 | -2.452130000                |
| 1                                            | -5.243898000 | -1.998528000 | -1.630691000                |
| 1                                            | -1.430569000 | -3.228524000 | -3.188756000                |
| 1                                            | -3.846187000 | -3.667684000 | -2.827678000                |
| Zero-point correction=                       |              |              | 0.478715 (Hartree/Particle) |
| Thermal correction to Energy=                |              |              | 0.508458                    |
| Thermal correction to Enthalpy=              |              |              | 0.509402                    |
| Thermal correction to Gibbs Free Energy=     |              |              | 0.417034                    |
| Sum of electronic and zero-point Energies=   |              |              | -1781.163988                |
| Sum of electronic and thermal Energies=      |              |              | -1781.134245                |
| Sum of electronic and thermal Enthalpies=    |              |              | -1781.133300                |
| Sum of electronic and thermal Free Energies= |              |              | -1781.225668                |

#### B-TSd5'

|   |              |              |             |
|---|--------------|--------------|-------------|
| 6 | -0.478986000 | -1.141260000 | 4.338645000 |
| 6 | 0.110820000  | 0.074380000  | 4.015137000 |
| 6 | 1.040771000  | 0.108840000  | 2.987660000 |
| 6 | 1.397101000  | -1.054264000 | 2.276095000 |
| 6 | 0.754985000  | -2.258642000 | 2.571141000 |
| 6 | -0.165922000 | -2.291264000 | 3.613850000 |



|    |              |              |              |
|----|--------------|--------------|--------------|
| 1  | -1.202976000 | -1.194202000 | 5.148350000  |
| 1  | -0.164471000 | 0.986328000  | 4.540670000  |
| 1  | 0.930643000  | -3.163319000 | 1.997735000  |
| 1  | -0.653456000 | -3.232266000 | 3.859071000  |
| 6  | 1.722281000  | 1.257909000  | 2.375011000  |
| 6  | 2.605539000  | 0.742479000  | 1.391684000  |
| 6  | 2.350946000  | -0.664700000 | 1.223781000  |
| 1  | 0.861839000  | 1.741762000  | 1.516513000  |
| 6  | 2.889316000  | -1.484021000 | 0.238237000  |
| 6  | 3.639110000  | 1.582956000  | 0.786247000  |
| 6  | 4.968293000  | 1.149678000  | 0.710769000  |
| 6  | 3.313249000  | 2.868365000  | 0.335694000  |
| 6  | 5.946844000  | 1.978917000  | 0.182765000  |
| 1  | 5.230767000  | 0.161690000  | 1.083613000  |
| 6  | 4.294408000  | 3.686141000  | -0.208036000 |
| 1  | 2.275970000  | 3.197100000  | 0.366973000  |
| 6  | 5.611621000  | 3.245407000  | -0.286645000 |
| 1  | 6.976995000  | 1.634347000  | 0.137212000  |
| 1  | 4.026541000  | 4.673303000  | -0.576553000 |
| 6  | 3.402855000  | -0.946866000 | -1.019331000 |
| 6  | 2.730891000  | 0.105909000  | -1.662141000 |
| 6  | 4.559259000  | -1.474687000 | -1.616479000 |
| 6  | 3.223833000  | 0.633515000  | -2.845307000 |
| 1  | 1.801406000  | 0.490540000  | -1.244634000 |
| 6  | 5.058015000  | -0.930755000 | -2.789022000 |
| 1  | 5.102369000  | -2.281134000 | -1.128167000 |
| 6  | 4.390529000  | 0.124470000  | -3.406296000 |
| 1  | 2.685475000  | 1.440270000  | -3.335274000 |
| 1  | 5.970085000  | -1.330374000 | -3.224973000 |
| 1  | 4.776024000  | 0.541214000  | -4.333741000 |
| 6  | 2.895445000  | -2.959858000 | 0.405191000  |
| 1  | 3.021096000  | -3.258640000 | 1.449694000  |
| 1  | 1.997918000  | 2.147180000  | 2.944569000  |
| 1  | 3.662951000  | -3.433879000 | -0.211634000 |
| 1  | 6.378023000  | 3.890528000  | -0.709139000 |
| 16 | -0.739180000 | -3.068310000 | -1.219000000 |
| 8  | -0.698172000 | -3.239340000 | -2.660094000 |
| 8  | 0.158671000  | -1.830385000 | -0.774914000 |
| 8  | -0.301071000 | -4.146472000 | -0.345399000 |
| 1  | 1.930032000  | -3.361343000 | 0.054333000  |
| 6  | -2.365838000 | -2.531864000 | -0.771847000 |
| 6  | -3.334875000 | -2.380327000 | -1.757386000 |
| 6  | -4.595826000 | -1.923226000 | -1.391704000 |
| 6  | -4.888017000 | -1.608769000 | -0.062375000 |

|                                              |              |              |                             |
|----------------------------------------------|--------------|--------------|-----------------------------|
| 6                                            | -3.895013000 | -1.780496000 | 0.906068000                 |
| 6                                            | -2.634940000 | -2.241517000 | 0.562135000                 |
| 1                                            | -3.091375000 | -2.616520000 | -2.789722000                |
| 1                                            | -5.366404000 | -1.798511000 | -2.151424000                |
| 1                                            | -4.105962000 | -1.522249000 | 1.942503000                 |
| 1                                            | -1.852718000 | -2.342849000 | 1.310838000                 |
| 6                                            | -6.221014000 | -1.043432000 | 0.320600000                 |
| 1                                            | -6.602965000 | -1.498619000 | 1.241102000                 |
| 1                                            | -6.138443000 | 0.036099000  | 0.506690000                 |
| 1                                            | -6.966190000 | -1.189449000 | -0.468215000                |
| 16                                           | -1.017959000 | 1.271307000  | 0.128364000                 |
| 8                                            | 0.015333000  | 2.282369000  | 0.610866000                 |
| 8                                            | -1.374081000 | 0.318185000  | 1.175035000                 |
| 8                                            | -0.593917000 | 0.653728000  | -1.156301000                |
| 1                                            | -0.212703000 | -0.939479000 | -1.045253000                |
| 6                                            | -2.453386000 | 2.230648000  | -0.265175000                |
| 6                                            | -2.565778000 | 3.568863000  | 0.076704000                 |
| 6                                            | -3.747978000 | 4.242596000  | -0.217679000                |
| 6                                            | -4.812411000 | 3.593555000  | -0.840544000                |
| 6                                            | -4.671739000 | 2.240017000  | -1.170771000                |
| 6                                            | -3.501615000 | 1.555638000  | -0.889253000                |
| 1                                            | -1.733238000 | 4.070891000  | 0.561515000                 |
| 1                                            | -3.845840000 | 5.295735000  | 0.041183000                 |
| 1                                            | -5.492926000 | 1.721148000  | -1.666768000                |
| 1                                            | -3.393815000 | 0.504443000  | -1.155319000                |
| 6                                            | -6.084060000 | 4.318698000  | -1.160524000                |
| 1                                            | -6.945784000 | 3.842593000  | -0.677372000                |
| 1                                            | -6.048357000 | 5.361364000  | -0.830125000                |
| 1                                            | -6.282667000 | 4.315467000  | -2.239046000                |
| Zero-point correction=                       |              |              | 0.477299 (Hartree/Particle) |
| Thermal correction to Energy=                |              |              | 0.506441                    |
| Thermal correction to Enthalpy=              |              |              | 0.507385                    |
| Thermal correction to Gibbs Free Energy=     |              |              | 0.417358                    |
| Sum of electronic and zero-point Energies=   |              |              | -1781.135771                |
| Sum of electronic and thermal Energies=      |              |              | -1781.106629                |
| Sum of electronic and thermal Enthalpies=    |              |              | -1781.105684                |
| Sum of electronic and thermal Free Energies= |              |              | -1781.195712                |

**B-p1'**

|   |             |              |              |
|---|-------------|--------------|--------------|
| 6 | 0.494980000 | -4.300494000 | 0.417634000  |
| 6 | 0.575472000 | -3.358211000 | -0.610605000 |
| 6 | 0.751279000 | -2.024776000 | -0.286587000 |
| 6 | 0.866569000 | -1.629544000 | 1.062074000  |
| 6 | 0.773631000 | -2.566249000 | 2.085358000  |

|    |              |              |              |
|----|--------------|--------------|--------------|
| 6  | 0.584331000  | -3.906856000 | 1.751125000  |
| 1  | 0.363145000  | -5.352804000 | 0.174711000  |
| 1  | 0.501957000  | -3.669293000 | -1.652009000 |
| 1  | 0.878231000  | -2.267082000 | 3.126458000  |
| 1  | 0.525681000  | -4.655247000 | 2.537956000  |
| 6  | 1.578824000  | 0.205248000  | -0.312015000 |
| 6  | 1.048864000  | -0.186731000 | 1.055194000  |
| 6  | 0.562779000  | 0.871056000  | 1.741948000  |
| 6  | 3.087194000  | 0.008137000  | -0.458686000 |
| 6  | 3.670352000  | -0.048584000 | -1.726562000 |
| 6  | 3.921632000  | -0.054862000 | 0.657633000  |
| 6  | 5.046151000  | -0.177739000 | -1.875724000 |
| 1  | 3.044890000  | 0.009716000  | -2.616592000 |
| 6  | 5.298213000  | -0.185798000 | 0.511594000  |
| 1  | 3.483024000  | -0.004401000 | 1.652581000  |
| 6  | 5.866215000  | -0.250650000 | -0.755372000 |
| 1  | 5.478097000  | -0.223417000 | -2.872927000 |
| 1  | 5.929445000  | -0.239246000 | 1.395694000  |
| 6  | 0.719131000  | 2.057062000  | 0.890500000  |
| 6  | 0.360613000  | 3.383521000  | 1.127197000  |
| 6  | 1.259775000  | 1.678312000  | -0.356702000 |
| 6  | 0.570417000  | 4.325683000  | 0.117452000  |
| 1  | -0.089342000 | 3.676310000  | 2.073909000  |
| 6  | 1.481143000  | 2.620372000  | -1.344327000 |
| 1  | -1.205623000 | 2.580209000  | -0.354181000 |
| 6  | 1.124931000  | 3.950078000  | -1.103993000 |
| 1  | 0.288906000  | 5.362255000  | 0.284910000  |
| 1  | 1.916109000  | 2.331186000  | -2.299668000 |
| 1  | 1.270816000  | 4.696820000  | -1.880183000 |
| 1  | 6.942243000  | -0.356835000 | -0.869819000 |
| 6  | -0.135547000 | 0.886163000  | 3.053959000  |
| 1  | -0.284841000 | -0.128776000 | 3.438677000  |
| 1  | -1.115651000 | 1.374300000  | 2.962345000  |
| 1  | 0.436429000  | 1.446346000  | 3.805446000  |
| 16 | -3.156663000 | 1.816438000  | 0.019378000  |
| 8  | -1.968598000 | 2.357304000  | -0.925819000 |
| 8  | -2.764433000 | 2.068108000  | 1.397808000  |
| 8  | -4.385880000 | 2.343922000  | -0.528662000 |
| 6  | -3.101720000 | 0.076422000  | -0.285716000 |
| 6  | -3.585103000 | -0.407530000 | -1.499260000 |
| 6  | -3.517254000 | -1.768458000 | -1.749798000 |
| 6  | -2.978037000 | -2.650584000 | -0.806601000 |
| 6  | -2.504145000 | -2.137157000 | 0.400870000  |
| 6  | -2.560328000 | -0.774830000 | 0.668740000  |

|                                              |              |              |                             |
|----------------------------------------------|--------------|--------------|-----------------------------|
| 1                                            | -4.016341000 | 0.279298000  | -2.223476000                |
| 1                                            | -3.897422000 | -2.162932000 | -2.691116000                |
| 1                                            | -2.075073000 | -2.814767000 | 1.138270000                 |
| 1                                            | -2.200874000 | -0.370366000 | 1.612337000                 |
| 6                                            | -2.905365000 | -4.117227000 | -1.102172000                |
| 1                                            | -2.105444000 | -4.334004000 | -1.822252000                |
| 1                                            | -3.840453000 | -4.482975000 | -1.541205000                |
| 1                                            | -2.698465000 | -4.699839000 | -0.199068000                |
| 6                                            | 0.796962000  | -0.811539000 | -1.186694000                |
| 1                                            | -0.224545000 | -0.430439000 | -1.351859000                |
| 1                                            | 1.241248000  | -1.007113000 | -2.168377000                |
| Zero-point correction=                       |              |              | 0.481748 (Hartree/Particle) |
| Thermal correction to Energy=                |              |              | 0.510694                    |
| Thermal correction to Enthalpy=              |              |              | 0.511638                    |
| Thermal correction to Gibbs Free Energy=     |              |              | 0.422901                    |
| Sum of electronic and zero-point Energies=   |              |              | -1781.210953                |
| Sum of electronic and thermal Energies=      |              |              | -1781.182006                |
| Sum of electronic and thermal Enthalpies=    |              |              | -1781.181062                |
| Sum of electronic and thermal Free Energies= |              |              | -1781.269799                |

#### B-TSe4'

|   |             |              |              |
|---|-------------|--------------|--------------|
| 6 | 0.582878000 | 4.622987000  | -0.411412000 |
| 6 | 0.694358000 | 3.554663000  | -1.263085000 |
| 6 | 1.199563000 | 2.329157000  | -0.764513000 |
| 6 | 1.607601000 | 2.250825000  | 0.613037000  |
| 6 | 1.454769000 | 3.361802000  | 1.470134000  |
| 6 | 0.958743000 | 4.532361000  | 0.954808000  |
| 1 | 0.183781000 | 5.564269000  | -0.782766000 |
| 1 | 0.374442000 | 3.630120000  | -2.300243000 |
| 1 | 1.739479000 | 3.291938000  | 2.518255000  |
| 1 | 0.842285000 | 5.403370000  | 1.594582000  |
| 6 | 1.337370000 | 1.070592000  | -1.389367000 |
| 6 | 1.875039000 | 0.138194000  | -0.420218000 |
| 6 | 1.958339000 | 0.912543000  | 0.866114000  |
| 1 | 1.418562000 | 0.935571000  | -2.465641000 |
| 6 | 2.036062000 | 0.115454000  | 2.013944000  |
| 6 | 3.071298000 | -0.626253000 | -0.916242000 |
| 6 | 2.965471000 | -1.374977000 | -2.093097000 |
| 6 | 4.299146000 | -0.601882000 | -0.253107000 |
| 6 | 4.052590000 | -2.075654000 | -2.594505000 |
| 1 | 2.012736000 | -1.405057000 | -2.621388000 |
| 6 | 5.390195000 | -1.304983000 | -0.756643000 |
| 1 | 4.406651000 | -0.018310000 | 0.657655000  |
| 6 | 5.273862000 | -2.043306000 | -1.926488000 |

|                                            |              |              |                             |
|--------------------------------------------|--------------|--------------|-----------------------------|
| 1                                          | 3.946848000  | -2.649205000 | -3.512601000                |
| 1                                          | 6.339681000  | -1.268025000 | -0.227040000                |
| 6                                          | 1.620882000  | -1.176775000 | 1.664875000                 |
| 6                                          | 1.971184000  | -2.409964000 | 2.259073000                 |
| 6                                          | 0.861583000  | -1.144864000 | 0.403351000                 |
| 6                                          | 1.730349000  | -3.575558000 | 1.582704000                 |
| 1                                          | 2.508733000  | -2.421191000 | 3.205806000                 |
| 6                                          | 0.652316000  | -2.414992000 | -0.264160000                |
| 1                                          | -0.041308000 | -0.530475000 | 0.476662000                 |
| 6                                          | 1.088079000  | -3.570289000 | 0.305043000                 |
| 1                                          | 2.055554000  | -4.523806000 | 2.003600000                 |
| 1                                          | 0.093953000  | -2.427408000 | -1.199490000                |
| 1                                          | 0.909980000  | -4.521812000 | -0.191669000                |
| 1                                          | 6.128076000  | -2.589971000 | -2.318644000                |
| 6                                          | 2.435058000  | 0.588179000  | 3.367648000                 |
| 1                                          | 3.327879000  | 1.223310000  | 3.331921000                 |
| 1                                          | 1.628431000  | 1.186990000  | 3.813682000                 |
| 1                                          | 2.630868000  | -0.246365000 | 4.048497000                 |
| 16                                         | -2.276304000 | 1.157196000  | -0.335636000                |
| 8                                          | -2.730366000 | 2.439145000  | -0.839865000                |
| 8                                          | -1.488677000 | 1.098139000  | 0.890124000                 |
| 8                                          | -1.462745000 | 0.372713000  | -1.475376000                |
| 1                                          | -0.509408000 | 0.683126000  | -1.464339000                |
| 6                                          | -3.654143000 | 0.059533000  | -0.206878000                |
| 6                                          | -4.893951000 | 0.464186000  | -0.679653000                |
| 6                                          | -5.970886000 | -0.407490000 | -0.567702000                |
| 6                                          | -5.818542000 | -1.668120000 | 0.008775000                 |
| 6                                          | -4.554514000 | -2.048099000 | 0.475111000                 |
| 6                                          | -3.470652000 | -1.191840000 | 0.375826000                 |
| 1                                          | -5.000241000 | 1.449368000  | -1.126054000                |
| 1                                          | -6.949902000 | -0.104093000 | -0.934510000                |
| 1                                          | -4.426754000 | -3.031835000 | 0.924546000                 |
| 1                                          | -2.488645000 | -1.482980000 | 0.744207000                 |
| 6                                          | -6.983950000 | -2.598701000 | 0.149036000                 |
| 1                                          | -7.331905000 | -2.638994000 | 1.188743000                 |
| 1                                          | -7.829625000 | -2.282411000 | -0.469299000                |
| 1                                          | -6.715553000 | -3.621604000 | -0.137798000                |
| Zero-point correction=                     |              |              | 0.476348 (Hartree/Particle) |
| Thermal correction to Energy=              |              |              | 0.505818                    |
| Thermal correction to Enthalpy=            |              |              | 0.506762                    |
| Thermal correction to Gibbs Free Energy=   |              |              | 0.414666                    |
| Sum of electronic and zero-point Energies= |              |              | -1781.122399                |
| Sum of electronic and thermal Energies=    |              |              | -1781.092929                |
| Sum of electronic and thermal Enthalpies=  |              |              | -1781.091985                |

Sum of electronic and thermal Free Energies= -1781.184081

**B-TSf3'**

|   |              |              |              |
|---|--------------|--------------|--------------|
| 6 | -0.577987000 | 5.168586000  | 0.229699000  |
| 6 | -0.582211000 | 4.250832000  | 1.275455000  |
| 6 | -0.907389000 | 2.933014000  | 0.990005000  |
| 6 | -1.207313000 | 2.529656000  | -0.312166000 |
| 6 | -1.191030000 | 3.441575000  | -1.354745000 |
| 6 | -0.876869000 | 4.767542000  | -1.072000000 |
| 1 | -0.332777000 | 6.208976000  | 0.428603000  |
| 1 | -0.331609000 | 4.558654000  | 2.288144000  |
| 1 | -1.425118000 | 3.127390000  | -2.369705000 |
| 1 | -0.860337000 | 5.499353000  | -1.875754000 |
| 6 | -0.907982000 | 1.729193000  | 1.858812000  |
| 6 | -1.409228000 | 0.641156000  | 1.086502000  |
| 6 | -1.503183000 | 1.056583000  | -0.351425000 |
| 1 | -0.722774000 | 0.508425000  | -0.918739000 |
| 6 | -2.896544000 | 0.661314000  | -0.849250000 |
| 6 | -1.688093000 | -0.675856000 | 1.590592000  |
| 6 | -1.278576000 | -1.821079000 | 0.883930000  |
| 6 | -2.406789000 | -0.810994000 | 2.790179000  |
| 6 | -1.617615000 | -3.075214000 | 1.364920000  |
| 1 | -0.641149000 | -1.707222000 | 0.008748000  |
| 6 | -2.766743000 | -2.069233000 | 3.243001000  |
| 1 | -2.722129000 | 0.080351000  | 3.328688000  |
| 6 | -2.374837000 | -3.199209000 | 2.526877000  |
| 1 | -1.299763000 | -3.959665000 | 0.818984000  |
| 1 | -3.351654000 | -2.173466000 | 4.152745000  |
| 6 | -3.078168000 | -0.712053000 | -1.360617000 |
| 6 | -4.191138000 | -1.461409000 | -0.962008000 |
| 6 | -2.141222000 | -1.301545000 | -2.217764000 |
| 6 | -4.370267000 | -2.761720000 | -1.413499000 |
| 1 | -4.896145000 | -1.023093000 | -0.257298000 |
| 6 | -2.325522000 | -2.600549000 | -2.673656000 |
| 1 | -1.245161000 | -0.756196000 | -2.510825000 |
| 6 | -3.437452000 | -3.334856000 | -2.272117000 |
| 1 | -5.233405000 | -3.334915000 | -1.083177000 |
| 1 | -1.589106000 | -3.043110000 | -3.339637000 |
| 1 | -3.571898000 | -4.355684000 | -2.622030000 |
| 6 | -3.916430000 | 1.518779000  | -0.739959000 |
| 1 | -3.782005000 | 2.517860000  | -0.333197000 |
| 1 | -1.046295000 | 1.764368000  | 2.941612000  |
| 1 | -4.907692000 | 1.252379000  | -1.098331000 |
| 1 | -2.656690000 | -4.186504000 | 2.885448000  |

|                                              |             |              |                             |
|----------------------------------------------|-------------|--------------|-----------------------------|
| 16                                           | 1.845764000 | 0.311125000  | -0.208415000                |
| 8                                            | 1.863668000 | 1.674611000  | -0.748775000                |
| 8                                            | 1.063130000 | -0.661821000 | -1.014200000                |
| 8                                            | 1.433198000 | 0.261663000  | 1.239032000                 |
| 1                                            | 0.170817000 | 1.234192000  | 1.706118000                 |
| 6                                            | 3.519382000 | -0.291463000 | -0.212243000                |
| 6                                            | 4.569147000 | 0.582452000  | -0.455480000                |
| 6                                            | 5.874866000 | 0.105111000  | -0.417216000                |
| 6                                            | 6.143424000 | -1.234551000 | -0.139580000                |
| 6                                            | 5.068476000 | -2.095576000 | 0.103413000                 |
| 6                                            | 3.762310000 | -1.632985000 | 0.067083000                 |
| 1                                            | 4.347974000 | 1.623758000  | -0.674952000                |
| 1                                            | 6.704441000 | 0.785253000  | -0.607133000                |
| 1                                            | 5.267017000 | -3.144317000 | 0.323055000                 |
| 1                                            | 2.924387000 | -2.302036000 | 0.248765000                 |
| 6                                            | 7.550433000 | -1.752023000 | -0.127569000                |
| 1                                            | 7.699534000 | -2.494237000 | 0.664759000                 |
| 1                                            | 7.801766000 | -2.242195000 | -1.077038000                |
| 1                                            | 8.274865000 | -0.944823000 | 0.023285000                 |
| Zero-point correction=                       |             |              | 0.475687 (Hartree/Particle) |
| Thermal correction to Energy=                |             |              | 0.504792                    |
| Thermal correction to Enthalpy=              |             |              | 0.505736                    |
| Thermal correction to Gibbs Free Energy=     |             |              | 0.413930                    |
| Sum of electronic and zero-point Energies=   |             |              | -1781.135181                |
| Sum of electronic and thermal Energies=      |             |              | -1781.106076                |
| Sum of electronic and thermal Enthalpies=    |             |              | -1781.105131                |
| Sum of electronic and thermal Free Energies= |             |              | -1781.196937                |

### B-3f

|   |              |             |              |
|---|--------------|-------------|--------------|
| 6 | 1.372744000  | 4.277301000 | 0.178946000  |
| 6 | 0.888814000  | 3.517661000 | 1.244399000  |
| 6 | -0.216716000 | 2.705089000 | 1.040315000  |
| 6 | -0.839887000 | 2.635441000 | -0.221415000 |
| 6 | -0.347197000 | 3.391679000 | -1.285779000 |
| 6 | 0.757120000  | 4.211473000 | -1.071099000 |
| 1 | 2.241250000  | 4.916112000 | 0.319871000  |
| 1 | 1.378591000  | 3.546670000 | 2.216183000  |
| 1 | -0.803044000 | 3.318386000 | -2.270701000 |
| 1 | 1.155308000  | 4.797883000 | -1.895901000 |
| 6 | -0.894302000 | 1.746020000 | 1.962860000  |
| 6 | -1.889149000 | 1.050727000 | 1.073814000  |
| 6 | -1.886861000 | 1.603880000 | -0.173005000 |
| 1 | 0.959772000  | 1.243134000 | -0.243337000 |
| 6 | -2.708400000 | 1.225414000 | -1.341360000 |

|    |              |              |              |
|----|--------------|--------------|--------------|
| 6  | -2.677292000 | -0.083796000 | 1.558451000  |
| 6  | -4.043614000 | -0.208849000 | 1.286187000  |
| 6  | -2.031438000 | -1.109434000 | 2.261757000  |
| 6  | -4.740534000 | -1.342184000 | 1.681505000  |
| 1  | -4.554172000 | 0.591444000  | 0.752994000  |
| 6  | -2.730613000 | -2.243039000 | 2.653141000  |
| 1  | -0.960328000 | -1.038430000 | 2.450941000  |
| 6  | -4.085435000 | -2.364251000 | 2.361395000  |
| 1  | -5.800689000 | -1.429676000 | 1.454931000  |
| 1  | -2.211571000 | -3.041814000 | 3.177666000  |
| 6  | -2.904134000 | -0.213766000 | -1.635575000 |
| 6  | -4.122772000 | -0.686608000 | -2.132034000 |
| 6  | -1.883708000 | -1.133487000 | -1.383366000 |
| 6  | -4.315976000 | -2.042665000 | -2.361791000 |
| 1  | -4.939056000 | 0.015874000  | -2.294628000 |
| 6  | -2.077034000 | -2.489521000 | -1.602633000 |
| 1  | -0.926795000 | -0.788079000 | -1.001493000 |
| 6  | -3.295764000 | -2.950054000 | -2.090873000 |
| 1  | -5.275106000 | -2.396067000 | -2.734300000 |
| 1  | -1.264117000 | -3.177630000 | -1.381564000 |
| 1  | -3.454551000 | -4.013766000 | -2.253580000 |
| 6  | -3.257223000 | 2.176153000  | -2.114240000 |
| 1  | -3.158224000 | 3.232454000  | -1.876491000 |
| 1  | -1.416962000 | 2.260554000  | 2.783917000  |
| 1  | -3.828784000 | 1.920102000  | -3.002924000 |
| 1  | -4.631606000 | -3.254943000 | 2.663320000  |
| 16 | 1.772612000  | -0.659821000 | 0.350771000  |
| 8  | 1.060184000  | -1.857563000 | -0.047930000 |
| 8  | 1.590258000  | -0.117996000 | 1.691455000  |
| 8  | 1.442647000  | 0.517630000  | -0.695136000 |
| 1  | -0.185551000 | 1.052299000  | 2.434824000  |
| 6  | 3.494713000  | -0.882124000 | 0.036194000  |
| 6  | 4.370293000  | 0.167857000  | 0.306146000  |
| 6  | 5.725276000  | -0.025108000 | 0.101760000  |
| 6  | 6.217179000  | -1.251509000 | -0.362684000 |
| 6  | 5.315996000  | -2.283196000 | -0.620653000 |
| 6  | 3.950576000  | -2.108047000 | -0.425162000 |
| 1  | 3.986436000  | 1.119167000  | 0.669433000  |
| 1  | 6.424057000  | 0.784600000  | 0.306119000  |
| 1  | 5.690065000  | -3.239909000 | -0.980395000 |
| 1  | 3.239817000  | -2.905282000 | -0.623772000 |
| 6  | 7.687284000  | -1.434969000 | -0.582606000 |
| 1  | 7.932691000  | -2.473358000 | -0.824622000 |
| 1  | 8.043436000  | -0.806676000 | -1.408024000 |



|                                              |             |              |                             |
|----------------------------------------------|-------------|--------------|-----------------------------|
| 1                                            | 8.260958000 | -1.149008000 | 0.306494000                 |
| Zero-point correction=                       |             |              | 0.479386 (Hartree/Particle) |
| Thermal correction to Energy=                |             |              | 0.509289                    |
| Thermal correction to Enthalpy=              |             |              | 0.510233                    |
| Thermal correction to Gibbs Free Energy=     |             |              | 0.417726                    |
| Sum of electronic and zero-point Energies=   |             |              | -1781.187997                |
| Sum of electronic and thermal Energies=      |             |              | -1781.158094                |
| Sum of electronic and thermal Enthalpies=    |             |              | -1781.157150                |
| Sum of electronic and thermal Free Energies= |             |              | -1781.249657                |

**B-TSh3'**

|   |              |              |              |
|---|--------------|--------------|--------------|
| 6 | -0.144766000 | -3.369171000 | -1.790637000 |
| 6 | -0.245179000 | -2.545054000 | -0.668944000 |
| 6 | -0.618129000 | -1.213975000 | -0.834101000 |
| 6 | -0.940123000 | -0.738133000 | -2.127520000 |
| 6 | -0.872660000 | -1.565211000 | -3.233397000 |
| 6 | -0.437134000 | -2.883825000 | -3.062763000 |
| 1 | 0.159541000  | -4.406258000 | -1.666600000 |
| 1 | -0.012434000 | -2.927766000 | 0.324368000  |
| 1 | -1.168938000 | -1.209756000 | -4.218072000 |
| 1 | -0.358742000 | -3.541274000 | -3.925641000 |
| 6 | -0.617209000 | -0.107450000 | 0.170950000  |
| 6 | -1.048802000 | 1.109279000  | -0.571428000 |
| 6 | -1.618590000 | 0.573270000  | -1.884283000 |
| 1 | -1.013889000 | -0.280136000 | 1.178097000  |
| 6 | -0.088028000 | 2.270177000  | -0.547810000 |
| 6 | 0.132026000  | 2.998028000  | 0.626987000  |
| 6 | 0.649394000  | 2.594960000  | -1.690214000 |
| 6 | 1.030590000  | 4.055450000  | 0.647167000  |
| 1 | -0.408812000 | 2.718298000  | 1.530916000  |
| 6 | 1.545206000  | 3.662591000  | -1.669773000 |
| 1 | 0.519762000  | 2.013343000  | -2.600623000 |
| 6 | 1.729190000  | 4.404022000  | -0.508363000 |
| 1 | 1.180347000  | 4.616088000  | 1.566982000  |
| 1 | 2.096471000  | 3.914739000  | -2.573132000 |
| 6 | -2.653208000 | 2.639966000  | -1.659622000 |
| 6 | -2.802433000 | 4.007022000  | -1.860209000 |
| 6 | -2.699638000 | 2.110083000  | -0.313223000 |
| 6 | -3.008918000 | 4.851728000  | -0.776128000 |
| 1 | -2.697799000 | 4.421246000  | -2.860734000 |
| 6 | -2.907178000 | 3.013995000  | 0.768037000  |
| 1 | -3.169515000 | 1.130759000  | -0.120914000 |
| 6 | -3.049436000 | 4.364287000  | 0.539638000  |
| 1 | -3.115720000 | 5.920485000  | -0.950288000 |

|    |              |              |              |
|----|--------------|--------------|--------------|
| 1  | -3.006084000 | 2.590004000  | 1.767470000  |
| 1  | -3.217836000 | 5.051686000  | 1.364292000  |
| 79 | 1.539941000  | -0.037978000 | 0.466715000  |
| 15 | 3.865742000  | -0.407995000 | 0.413786000  |
| 6  | 4.436987000  | -1.712765000 | 1.547312000  |
| 6  | 4.918418000  | 1.037674000  | 0.749618000  |
| 6  | 4.309976000  | -0.958683000 | -1.267623000 |
| 6  | 5.460284000  | -2.603077000 | 1.211522000  |
| 6  | 3.840303000  | -1.786231000 | 2.809864000  |
| 6  | 4.469468000  | 2.278414000  | 0.287482000  |
| 6  | 6.141491000  | 0.946026000  | 1.418194000  |
| 6  | 5.569795000  | -0.710101000 | -1.820581000 |
| 6  | 3.352361000  | -1.655501000 | -2.013509000 |
| 6  | 5.885636000  | -3.551853000 | 2.135599000  |
| 1  | 5.920961000  | -2.557300000 | 0.225564000  |
| 6  | 4.271601000  | -2.733106000 | 3.730990000  |
| 1  | 3.029709000  | -1.102837000 | 3.063674000  |
| 6  | 5.243947000  | 3.414674000  | 0.483032000  |
| 1  | 3.506924000  | 2.356886000  | -0.221669000 |
| 6  | 6.910918000  | 2.088786000  | 1.614426000  |
| 1  | 6.490960000  | -0.016651000 | 1.788989000  |
| 6  | 5.869955000  | -1.162193000 | -3.101132000 |
| 1  | 6.314961000  | -0.154816000 | -1.251569000 |
| 6  | 3.658722000  | -2.106198000 | -3.292280000 |
| 1  | 2.359916000  | -1.844526000 | -1.598614000 |
| 6  | 5.293692000  | -3.615704000 | 3.393518000  |
| 1  | 6.679215000  | -4.246102000 | 1.870003000  |
| 1  | 3.801575000  | -2.789244000 | 4.709605000  |
| 6  | 6.464330000  | 3.320838000  | 1.146739000  |
| 1  | 4.885608000  | 4.376646000  | 0.122882000  |
| 1  | 7.861163000  | 2.015851000  | 2.138075000  |
| 6  | 4.915539000  | -1.859654000 | -3.836475000 |
| 1  | 6.850286000  | -0.964040000 | -3.528043000 |
| 1  | 2.903966000  | -2.641906000 | -3.863287000 |
| 1  | 5.625933000  | -4.361463000 | 4.111740000  |
| 1  | 7.066546000  | 4.212084000  | 1.306721000  |
| 1  | 5.150997000  | -2.205869000 | -4.840164000 |
| 8  | -4.590994000 | -0.716745000 | -1.906274000 |
| 16 | -4.911513000 | -1.257591000 | -0.587515000 |
| 9  | -3.187450000 | -3.152945000 | -1.107796000 |
| 9  | -4.574211000 | -3.622306000 | 0.478352000  |
| 9  | -5.241150000 | -3.627873000 | -1.574235000 |
| 6  | -4.441266000 | -3.037757000 | -0.696539000 |
| 8  | -4.356069000 | -1.776284000 | 2.706225000  |

|                                              |              |              |                             |
|----------------------------------------------|--------------|--------------|-----------------------------|
| 8                                            | -2.873877000 | 0.258590000  | 2.503418000                 |
| 16                                           | -4.013053000 | -0.534989000 | 2.035241000                 |
| 9                                            | -5.577664000 | 1.476817000  | 1.334755000                 |
| 9                                            | -6.589030000 | -0.072135000 | 2.451923000                 |
| 9                                            | -5.240697000 | 1.274839000  | 3.452997000                 |
| 6                                            | -5.468263000 | 0.601118000  | 2.331037000                 |
| 7                                            | -3.830127000 | -0.624219000 | 0.433171000                 |
| 8                                            | -6.283051000 | -1.255173000 | -0.102667000                |
| 1                                            | 2.413124000  | 5.250365000  | -0.500008000                |
| 6                                            | -2.135890000 | 1.714248000  | -2.685484000                |
| 6                                            | -2.167901000 | 1.893802000  | -4.008483000                |
| 1                                            | -1.710355000 | 1.179516000  | -4.686922000                |
| 1                                            | -2.681103000 | 2.739558000  | -4.459741000                |
| 1                                            | -2.580964000 | 0.133944000  | -1.555609000                |
| Zero-point correction=                       |              |              | 0.666378 (Hartree/Particle) |
| Thermal correction to Energy=                |              |              | 0.718373                    |
| Thermal correction to Enthalpy=              |              |              | 0.719317                    |
| Thermal correction to Gibbs Free Energy=     |              |              | 0.575008                    |
| Sum of electronic and zero-point Energies=   |              |              | -3883.745370                |
| Sum of electronic and thermal Energies=      |              |              | -3883.693375                |
| Sum of electronic and thermal Enthalpies=    |              |              | -3883.692431                |
| Sum of electronic and thermal Free Energies= |              |              | -3883.836740                |

### B-TSi3'

|   |              |              |              |
|---|--------------|--------------|--------------|
| 6 | 4.771072000  | -0.574451000 | 0.674216000  |
| 6 | 3.767375000  | -1.493548000 | 0.941559000  |
| 6 | 2.490035000  | -1.272135000 | 0.422177000  |
| 6 | 2.234385000  | -0.142035000 | -0.386746000 |
| 6 | 3.243466000  | 0.779356000  | -0.641658000 |
| 6 | 4.507006000  | 0.555836000  | -0.106869000 |
| 1 | 5.769093000  | -0.727931000 | 1.078110000  |
| 1 | 3.963338000  | -2.368620000 | 1.558804000  |
| 1 | 3.051990000  | 1.654778000  | -1.260750000 |
| 1 | 5.303337000  | 1.270248000  | -0.303388000 |
| 6 | 1.262294000  | -2.010686000 | 0.570483000  |
| 6 | 0.246351000  | -1.368150000 | -0.080823000 |
| 6 | 0.792199000  | -0.197781000 | -0.781589000 |
| 1 | 1.251861000  | 0.134399000  | -2.132010000 |
| 6 | 0.094516000  | 1.026222000  | -1.108345000 |
| 6 | -1.157560000 | -1.774526000 | -0.120149000 |
| 6 | -1.979956000 | -1.471945000 | -1.213601000 |
| 6 | -1.719906000 | -2.479651000 | 0.952719000  |
| 6 | -3.311156000 | -1.867129000 | -1.235813000 |
| 1 | -1.560490000 | -0.936185000 | -2.062929000 |

|                                              |              |              |                             |
|----------------------------------------------|--------------|--------------|-----------------------------|
| 6                                            | -3.048090000 | -2.879207000 | 0.927698000                 |
| 1                                            | -1.103126000 | -2.694100000 | 1.823736000                 |
| 6                                            | -3.851857000 | -2.574328000 | -0.167282000                |
| 1                                            | -3.928847000 | -1.625332000 | -2.097908000                |
| 1                                            | -3.463375000 | -3.422654000 | 1.773517000                 |
| 6                                            | -0.679447000 | 1.845382000  | -0.202076000                |
| 6                                            | -1.465740000 | 2.901722000  | -0.687237000                |
| 6                                            | -0.636040000 | 1.609857000  | 1.181691000                 |
| 6                                            | -2.179710000 | 3.706862000  | 0.186637000                 |
| 1                                            | -1.523625000 | 3.066593000  | -1.761459000                |
| 6                                            | -1.369121000 | 2.402732000  | 2.050414000                 |
| 1                                            | -0.004236000 | 0.808704000  | 1.562221000                 |
| 6                                            | -2.136905000 | 3.454769000  | 1.555868000                 |
| 1                                            | -2.785387000 | 4.523762000  | -0.197841000                |
| 1                                            | -1.332379000 | 2.211701000  | 3.119905000                 |
| 1                                            | -2.706531000 | 4.079322000  | 2.239936000                 |
| 6                                            | 0.473443000  | 1.309174000  | -2.436750000                |
| 1                                            | 0.585952000  | 2.332275000  | -2.818055000                |
| 1                                            | 1.173429000  | -2.956085000 | 1.100066000                 |
| 1                                            | 0.123413000  | 0.613784000  | -3.204034000                |
| 1                                            | -4.894350000 | -2.882692000 | -0.185065000                |
| Zero-point correction=                       |              |              | 0.328813 (Hartree/Particle) |
| Thermal correction to Energy=                |              |              | 0.346641                    |
| Thermal correction to Enthalpy=              |              |              | 0.347585                    |
| Thermal correction to Gibbs Free Energy=     |              |              | 0.281719                    |
| Sum of electronic and zero-point Energies=   |              |              | -886.167740                 |
| Sum of electronic and thermal Energies=      |              |              | -886.149912                 |
| Sum of electronic and thermal Enthalpies=    |              |              | -886.148968                 |
| Sum of electronic and thermal Free Energies= |              |              | -886.214834                 |

### B-TSa3

|   |              |              |              |
|---|--------------|--------------|--------------|
| 6 | -0.856978000 | -3.410094000 | -1.512766000 |
| 6 | -0.792517000 | -2.529122000 | -0.444101000 |
| 6 | -0.749711000 | -1.157994000 | -0.703370000 |
| 6 | -0.817340000 | -0.692231000 | -2.039715000 |
| 6 | -0.879405000 | -1.590043000 | -3.109988000 |
| 6 | -0.879340000 | -2.948426000 | -2.837361000 |
| 1 | -0.898050000 | -4.480041000 | -1.320959000 |
| 1 | -0.786345000 | -2.889009000 | 0.583256000  |
| 1 | -0.926896000 | -1.234614000 | -4.136879000 |
| 1 | -0.925318000 | -3.664479000 | -3.654207000 |
| 6 | -0.579572000 | -0.029547000 | 0.224252000  |
| 6 | -0.788492000 | 1.188143000  | -0.573829000 |
| 6 | -0.999108000 | 0.735298000  | -1.966411000 |

|    |              |              |              |
|----|--------------|--------------|--------------|
| 1  | -0.988902000 | -0.081007000 | 1.238653000  |
| 6  | -1.715668000 | 1.577371000  | -2.792563000 |
| 6  | 0.001315000  | 2.410975000  | -0.201364000 |
| 6  | 0.058231000  | 2.796984000  | 1.145368000  |
| 6  | 0.704148000  | 3.160622000  | -1.145533000 |
| 6  | 0.793210000  | 3.906496000  | 1.532205000  |
| 1  | -0.497503000 | 2.221503000  | 1.885701000  |
| 6  | 1.435776000  | 4.282186000  | -0.754142000 |
| 1  | 0.682373000  | 2.864735000  | -2.192247000 |
| 6  | 1.483371000  | 4.659782000  | 0.581734000  |
| 1  | 0.820437000  | 4.192752000  | 2.580878000  |
| 1  | 1.972743000  | 4.858275000  | -1.505614000 |
| 6  | -2.365593000 | 2.565377000  | -1.993344000 |
| 6  | -2.657398000 | 3.888633000  | -2.366022000 |
| 6  | -2.560010000 | 2.134700000  | -0.632914000 |
| 6  | -2.992429000 | 4.798367000  | -1.387108000 |
| 1  | -2.521962000 | 4.207594000  | -3.397730000 |
| 6  | -2.910848000 | 3.106693000  | 0.345464000  |
| 1  | -2.965307000 | 1.129006000  | -0.461838000 |
| 6  | -3.098515000 | 4.413064000  | -0.028939000 |
| 1  | -3.156924000 | 5.839636000  | -1.655151000 |
| 1  | -3.070572000 | 2.773622000  | 1.369505000  |
| 1  | -3.384024000 | 5.157929000  | 0.709963000  |
| 79 | 1.577799000  | -0.158706000 | 0.441885000  |
| 15 | 3.905305000  | -0.479941000 | 0.326675000  |
| 6  | 4.584680000  | -1.712805000 | 1.479974000  |
| 6  | 4.874014000  | 1.039477000  | 0.586459000  |
| 6  | 4.319933000  | -1.063734000 | -1.350496000 |
| 6  | 5.635976000  | -2.565962000 | 1.134364000  |
| 6  | 4.034402000  | -1.774571000 | 2.764052000  |
| 6  | 4.290182000  | 2.256154000  | 0.219221000  |
| 6  | 6.164178000  | 1.022820000  | 1.124208000  |
| 6  | 5.551020000  | -0.785233000 | -1.951620000 |
| 6  | 3.365196000  | -1.814436000 | -2.045592000 |
| 6  | 6.134348000  | -3.466480000 | 2.070064000  |
| 1  | 6.059760000  | -2.530103000 | 0.131600000  |
| 6  | 4.538508000  | -2.672859000 | 3.696370000  |
| 1  | 3.201752000  | -1.121831000 | 3.026622000  |
| 6  | 4.999928000  | 3.441062000  | 0.370449000  |
| 1  | 3.272039000  | 2.281829000  | -0.175292000 |
| 6  | 6.867465000  | 2.212924000  | 1.277361000  |
| 1  | 6.614598000  | 0.079615000  | 1.431493000  |
| 6  | 5.826494000  | -1.263497000 | -3.228144000 |
| 1  | 6.291965000  | -0.184728000 | -1.424829000 |

|                                              |              |              |                             |
|----------------------------------------------|--------------|--------------|-----------------------------|
| 6                                            | 3.645161000  | -2.289226000 | -3.321618000                |
| 1                                            | 2.394388000  | -2.019707000 | -1.590580000                |
| 6                                            | 5.587881000  | -3.518989000 | 3.348791000                 |
| 1                                            | 6.949632000  | -4.132177000 | 1.797280000                 |
| 1                                            | 4.104002000  | -2.720515000 | 4.691660000                 |
| 6                                            | 6.287449000  | 3.420337000  | 0.898401000                 |
| 1                                            | 4.534225000  | 4.382478000  | 0.086605000                 |
| 1                                            | 7.869608000  | 2.197348000  | 1.699017000                 |
| 6                                            | 4.874853000  | -2.014357000 | -3.912490000                |
| 1                                            | 6.784639000  | -1.042740000 | -3.692578000                |
| 1                                            | 2.893280000  | -2.864956000 | -3.855604000                |
| 1                                            | 5.976707000  | -4.228170000 | 4.075616000                 |
| 1                                            | 6.838267000  | 4.349539000  | 1.024395000                 |
| 1                                            | 5.090281000  | -2.380413000 | -4.913579000                |
| 8                                            | -3.977422000 | -1.245239000 | -1.957932000                |
| 16                                           | -4.690350000 | -1.280879000 | -0.686931000                |
| 9                                            | -3.548721000 | -3.486612000 | 0.203665000                 |
| 9                                            | -5.618776000 | -3.258023000 | 0.763970000                 |
| 9                                            | -5.104874000 | -3.778804000 | -1.262340000                |
| 6                                            | -4.739390000 | -3.070450000 | -0.200903000                |
| 8                                            | -4.296266000 | -1.590218000 | 2.674391000                 |
| 8                                            | -2.930940000 | 0.520400000  | 2.433040000                 |
| 16                                           | -3.995736000 | -0.364548000 | 1.949298000                 |
| 9                                            | -5.519308000 | 1.650394000  | 1.229991000                 |
| 9                                            | -6.612308000 | -0.044966000 | 2.010437000                 |
| 9                                            | -5.501914000 | 1.226810000  | 3.345942000                 |
| 6                                            | -5.520207000 | 0.678495000  | 2.136429000                 |
| 7                                            | -3.728183000 | -0.552062000 | 0.381311000                 |
| 8                                            | -6.083089000 | -0.859698000 | -0.627998000                |
| 1                                            | 2.051581000  | 5.536497000  | 0.885395000                 |
| 6                                            | -1.961963000 | 1.367881000  | -4.243523000                |
| 1                                            | -1.042426000 | 1.167897000  | -4.803971000                |
| 1                                            | -2.621462000 | 0.494734000  | -4.361306000                |
| 1                                            | -2.472168000 | 2.223814000  | -4.696175000                |
| Zero-point correction=                       |              |              | 0.666936 (Hartree/Particle) |
| Thermal correction to Energy=                |              |              | 0.717523                    |
| Thermal correction to Enthalpy=              |              |              | 0.718467                    |
| Thermal correction to Gibbs Free Energy=     |              |              | 0.579525                    |
| Sum of electronic and zero-point Energies=   |              |              | -3883.807670                |
| Sum of electronic and thermal Energies=      |              |              | -3883.757083                |
| Sum of electronic and thermal Enthalpies=    |              |              | -3883.756139                |
| Sum of electronic and thermal Free Energies= |              |              | -3883.895081                |

### B-3a

|    |              |              |              |
|----|--------------|--------------|--------------|
| 6  | -1.275884000 | 2.543125000  | -3.896359000 |
| 6  | -0.693347000 | 1.596027000  | -3.065062000 |
| 6  | -0.983367000 | 1.612844000  | -1.701416000 |
| 6  | -1.867749000 | 2.606824000  | -1.205192000 |
| 6  | -2.467220000 | 3.548642000  | -2.053863000 |
| 6  | -2.156784000 | 3.516619000  | -3.400564000 |
| 1  | -1.045338000 | 2.532401000  | -4.959757000 |
| 1  | -0.014847000 | 0.844896000  | -3.466304000 |
| 1  | -3.156691000 | 4.290709000  | -1.657093000 |
| 1  | -2.596205000 | 4.241760000  | -4.080514000 |
| 6  | -0.557545000 | 0.653452000  | -0.644735000 |
| 6  | -1.022559000 | 1.363376000  | 0.657867000  |
| 6  | -2.049196000 | 2.355375000  | 0.185689000  |
| 1  | -1.141945000 | -0.270788000 | -0.773003000 |
| 6  | -2.997843000 | 2.646208000  | 1.147753000  |
| 6  | 0.146061000  | 2.098206000  | 1.341847000  |
| 6  | 1.041007000  | 1.409915000  | 2.169047000  |
| 6  | 0.398721000  | 3.450412000  | 1.098861000  |
| 6  | 2.135890000  | 2.045664000  | 2.742270000  |
| 1  | 0.909316000  | 0.347022000  | 2.357042000  |
| 6  | 1.499916000  | 4.090966000  | 1.665424000  |
| 1  | -0.265111000 | 4.021453000  | 0.454039000  |
| 6  | 2.372094000  | 3.395299000  | 2.492922000  |
| 1  | 2.810933000  | 1.473675000  | 3.377089000  |
| 1  | 1.664953000  | 5.146771000  | 1.460487000  |
| 6  | -2.829974000 | 1.684074000  | 2.169328000  |
| 6  | -3.443251000 | 1.593521000  | 3.431754000  |
| 6  | -1.885429000 | 0.628866000  | 1.736966000  |
| 6  | -2.999337000 | 0.634747000  | 4.311586000  |
| 1  | -4.207455000 | 2.306583000  | 3.731501000  |
| 6  | -1.398231000 | -0.294761000 | 2.760103000  |
| 1  | -2.532938000 | -0.027578000 | 1.088517000  |
| 6  | -1.967687000 | -0.299364000 | 3.993703000  |
| 1  | -3.448769000 | 0.584525000  | 5.301908000  |
| 1  | -0.696336000 | -1.069965000 | 2.456677000  |
| 1  | -1.684207000 | -1.042749000 | 4.733418000  |
| 79 | 1.449739000  | 0.029071000  | -0.677760000 |
| 15 | 3.724791000  | -0.606756000 | -0.371957000 |
| 6  | 4.401689000  | -1.997516000 | -1.330950000 |
| 6  | 3.906095000  | -1.095737000 | 1.379713000  |
| 6  | 4.892481000  | 0.777626000  | -0.579169000 |
| 6  | 5.396723000  | -2.836431000 | -0.819825000 |
| 6  | 3.907741000  | -2.214053000 | -2.620191000 |
| 6  | 4.913572000  | -0.594763000 | 2.206113000  |

|    |              |              |              |
|----|--------------|--------------|--------------|
| 6  | 2.944850000  | -1.964145000 | 1.911039000  |
| 6  | 6.201024000  | 0.607894000  | -1.035687000 |
| 6  | 4.448394000  | 2.050654000  | -0.203715000 |
| 6  | 5.896145000  | -3.875371000 | -1.596565000 |
| 1  | 5.775208000  | -2.678656000 | 0.189777000  |
| 6  | 4.413059000  | -3.251677000 | -3.395375000 |
| 1  | 3.116847000  | -1.571458000 | -3.006626000 |
| 6  | 4.956085000  | -0.955188000 | 3.550782000  |
| 1  | 5.659295000  | 0.088529000  | 1.801522000  |
| 6  | 2.992182000  | -2.322849000 | 3.252395000  |
| 1  | 2.148993000  | -2.348443000 | 1.270453000  |
| 6  | 7.057693000  | 1.702294000  | -1.110902000 |
| 1  | 6.551506000  | -0.378974000 | -1.334364000 |
| 6  | 5.311992000  | 3.137035000  | -0.267795000 |
| 1  | 3.423732000  | 2.187663000  | 0.146425000  |
| 6  | 5.405051000  | -4.082112000 | -2.882999000 |
| 1  | 6.666019000  | -4.529946000 | -1.195075000 |
| 1  | 4.021783000  | -3.419467000 | -4.395675000 |
| 6  | 3.995586000  | -1.813770000 | 4.074947000  |
| 1  | 5.741631000  | -0.559844000 | 4.190645000  |
| 1  | 2.241266000  | -2.997368000 | 3.657230000  |
| 6  | 6.616174000  | 2.963774000  | -0.723953000 |
| 1  | 8.074101000  | 1.567838000  | -1.473508000 |
| 1  | 4.959965000  | 4.122217000  | 0.030865000  |
| 1  | 5.792215000  | -4.900005000 | -3.486022000 |
| 1  | 4.027010000  | -2.088343000 | 5.126685000  |
| 1  | 7.289501000  | 3.815811000  | -0.782464000 |
| 8  | -5.020796000 | 1.013713000  | -0.484643000 |
| 16 | -4.904325000 | -0.397134000 | -0.833796000 |
| 9  | -4.503203000 | -1.597995000 | -3.127782000 |
| 9  | -5.880463000 | 0.062932000  | -3.183045000 |
| 9  | -3.758128000 | 0.424981000  | -3.034495000 |
| 6  | -4.742813000 | -0.383976000 | -2.669016000 |
| 8  | -3.589395000 | -3.482577000 | -0.795039000 |
| 8  | -1.774624000 | -2.422086000 | 0.599506000  |
| 16 | -3.153117000 | -2.437335000 | 0.111615000  |
| 9  | -4.447130000 | -1.481087000 | 2.217583000  |
| 9  | -5.301234000 | -3.293642000 | 1.412492000  |
| 9  | -3.468386000 | -3.374802000 | 2.539604000  |
| 6  | -4.175914000 | -2.666377000 | 1.667603000  |
| 7  | -3.449527000 | -0.910630000 | -0.342580000 |
| 8  | -5.996312000 | -1.314210000 | -0.544002000 |
| 6  | -4.099993000 | 3.641197000  | 1.042419000  |
| 1  | -4.830682000 | 3.290918000  | 0.301827000  |



|                                              |              |             |                             |
|----------------------------------------------|--------------|-------------|-----------------------------|
| 1                                            | -4.627010000 | 3.768449000 | 1.993307000                 |
| 1                                            | -3.731931000 | 4.625583000 | 0.731203000                 |
| 1                                            | 3.228978000  | 3.895950000 | 2.938541000                 |
| Zero-point correction=                       |              |             | 0.669045 (Hartree/Particle) |
| Thermal correction to Energy=                |              |             | 0.721000                    |
| Thermal correction to Enthalpy=              |              |             | 0.721944                    |
| Thermal correction to Gibbs Free Energy=     |              |             | 0.578564                    |
| Sum of electronic and zero-point Energies=   |              |             | -3883.818524                |
| Sum of electronic and thermal Energies=      |              |             | -3883.766568                |
| Sum of electronic and thermal Enthalpies=    |              |             | -3883.765624                |
| Sum of electronic and thermal Free Energies= |              |             | -3883.909005                |

#### B-TSa4

|   |              |              |              |
|---|--------------|--------------|--------------|
| 6 | 1.309937000  | -4.046803000 | -3.393793000 |
| 6 | 0.711924000  | -2.997072000 | -2.694878000 |
| 6 | 1.281660000  | -2.563341000 | -1.507058000 |
| 6 | 2.452823000  | -3.195205000 | -1.034704000 |
| 6 | 3.055080000  | -4.237211000 | -1.733190000 |
| 6 | 2.467127000  | -4.665440000 | -2.920128000 |
| 1 | 0.863025000  | -4.393732000 | -4.323304000 |
| 1 | -0.190161000 | -2.516754000 | -3.072656000 |
| 1 | 3.951386000  | -4.722487000 | -1.349696000 |
| 1 | 2.907544000  | -5.488624000 | -3.477544000 |
| 6 | 0.912439000  | -1.397950000 | -0.630122000 |
| 6 | 1.605735000  | -1.796758000 | 0.729645000  |
| 6 | 2.826406000  | -2.488190000 | 0.173079000  |
| 1 | 1.496217000  | -0.544194000 | -1.010276000 |
| 6 | 4.000288000  | -2.042190000 | 0.701811000  |
| 6 | 0.738781000  | -2.719468000 | 1.585250000  |
| 6 | -0.464272000 | -2.250907000 | 2.124490000  |
| 6 | 1.119336000  | -4.028833000 | 1.881575000  |
| 6 | -1.270064000 | -3.060992000 | 2.912422000  |
| 1 | -0.791679000 | -1.233685000 | 1.914476000  |
| 6 | 0.314957000  | -4.847130000 | 2.672746000  |
| 1 | 2.053077000  | -4.424521000 | 1.486881000  |
| 6 | -0.883300000 | -4.370253000 | 3.188309000  |
| 1 | -2.202559000 | -2.659002000 | 3.307721000  |
| 1 | 0.631911000  | -5.866664000 | 2.881818000  |
| 6 | 3.669397000  | -1.046867000 | 1.683529000  |
| 6 | 4.502507000  | -0.363266000 | 2.573895000  |
| 6 | 2.258704000  | -0.719385000 | 1.615237000  |
| 6 | 3.922665000  | 0.482980000  | 3.499874000  |
| 1 | 5.578258000  | -0.519561000 | 2.556726000  |
| 6 | 1.689713000  | 0.022659000  | 2.707542000  |

|    |              |              |              |
|----|--------------|--------------|--------------|
| 1  | 2.401346000  | 0.305131000  | 0.900446000  |
| 6  | 2.524440000  | 0.658138000  | 3.591773000  |
| 1  | 4.561893000  | 1.017058000  | 4.200158000  |
| 1  | 0.617135000  | 0.194153000  | 2.738557000  |
| 1  | 2.115909000  | 1.311804000  | 4.357076000  |
| 79 | -1.049595000 | -0.661457000 | -0.634605000 |
| 15 | -3.210158000 | 0.297642000  | -0.339005000 |
| 6  | -3.316571000 | 2.096612000  | -0.585346000 |
| 6  | -3.608711000 | 0.088017000  | 1.436678000  |
| 6  | -4.598995000 | -0.470875000 | -1.235875000 |
| 6  | -4.361877000 | 2.851383000  | -0.037558000 |
| 6  | -2.289262000 | 2.738057000  | -1.278812000 |
| 6  | -4.702335000 | -0.641018000 | 1.900601000  |
| 6  | -2.710775000 | 0.653174000  | 2.353192000  |
| 6  | -5.656397000 | 0.256645000  | -1.784872000 |
| 6  | -4.578715000 | -1.864408000 | -1.368995000 |
| 6  | -4.387192000 | 4.228930000  | -0.209329000 |
| 1  | -5.147954000 | 2.357814000  | 0.534517000  |
| 6  | -2.310105000 | 4.120799000  | -1.435771000 |
| 1  | -1.447549000 | 2.164500000  | -1.665515000 |
| 6  | -4.896519000 | -0.810557000 | 3.270387000  |
| 1  | -5.404840000 | -1.079664000 | 1.193727000  |
| 6  | -2.909062000 | 0.479335000  | 3.716524000  |
| 1  | -1.854445000 | 1.226703000  | 1.989597000  |
| 6  | -6.685062000 | -0.403513000 | -2.450273000 |
| 1  | -5.671814000 | 1.341679000  | -1.702069000 |
| 6  | -5.614521000 | -2.520564000 | -2.022052000 |
| 1  | -3.742473000 | -2.430689000 | -0.956429000 |
| 6  | -3.360682000 | 4.862621000  | -0.908592000 |
| 1  | -5.200323000 | 4.813076000  | 0.215407000  |
| 1  | -1.489238000 | 4.608889000  | -1.955062000 |
| 6  | -4.001448000 | -0.255143000 | 4.177617000  |
| 1  | -5.752659000 | -1.379294000 | 3.626049000  |
| 1  | -2.208395000 | 0.917642000  | 4.424021000  |
| 6  | -6.668029000 | -1.789260000 | -2.565119000 |
| 1  | -7.501974000 | 0.169614000  | -2.882442000 |
| 1  | -5.593014000 | -3.603387000 | -2.118248000 |
| 1  | -3.375810000 | 5.943632000  | -1.027821000 |
| 1  | -4.153274000 | -0.391786000 | 5.245825000  |
| 1  | -7.473558000 | -2.301660000 | -3.086019000 |
| 8  | 4.979266000  | 1.084822000  | -0.216111000 |
| 16 | 3.902536000  | 1.832406000  | -0.844194000 |
| 9  | 2.348700000  | 1.193462000  | -2.871571000 |
| 9  | 4.463272000  | 1.271406000  | -3.306660000 |

|                                              |              |              |                             |
|----------------------------------------------|--------------|--------------|-----------------------------|
| 9                                            | 3.650247000  | -0.392720000 | -2.203896000                |
| 6                                            | 3.555119000  | 0.912409000  | -2.416423000                |
| 8                                            | 0.891727000  | 3.041034000  | -1.285432000                |
| 8                                            | 0.226125000  | 1.825779000  | 0.828861000                 |
| 16                                           | 1.229693000  | 2.521108000  | 0.027284000                 |
| 9                                            | 2.063446000  | 3.612214000  | 2.251596000                 |
| 9                                            | 2.528520000  | 4.775400000  | 0.497192000                 |
| 9                                            | 0.498376000  | 4.681692000  | 1.214550000                 |
| 6                                            | 1.627732000  | 4.003696000  | 1.063254000                 |
| 7                                            | 2.563500000  | 1.581508000  | 0.074291000                 |
| 8                                            | 4.072736000  | 3.214977000  | -1.242359000                |
| 1                                            | -1.511350000 | -5.011948000 | 3.802247000                 |
| 6                                            | 5.386422000  | -2.365347000 | 0.266080000                 |
| 1                                            | 5.926693000  | -2.967818000 | 1.007578000                 |
| 1                                            | 5.375451000  | -2.921707000 | -0.677176000                |
| 1                                            | 5.955777000  | -1.441837000 | 0.104500000                 |
| Zero-point correction=                       |              |              | 0.665831 (Hartree/Particle) |
| Thermal correction to Energy=                |              |              | 0.717102                    |
| Thermal correction to Enthalpy=              |              |              | 0.718046                    |
| Thermal correction to Gibbs Free Energy=     |              |              | 0.578886                    |
| Sum of electronic and zero-point Energies=   |              |              | -3883.826556                |
| Sum of electronic and thermal Energies=      |              |              | -3883.775285                |
| Sum of electronic and thermal Enthalpies=    |              |              | -3883.774341                |
| Sum of electronic and thermal Free Energies= |              |              | -3883.913502                |

#### B-4a

|   |              |              |              |
|---|--------------|--------------|--------------|
| 6 | 2.023135000  | -2.728389000 | 1.925928000  |
| 6 | 1.168220000  | -2.094306000 | 1.022524000  |
| 6 | 1.129288000  | -0.705366000 | 0.967139000  |
| 6 | 1.974490000  | 0.041376000  | 1.825177000  |
| 6 | 2.814181000  | -0.593220000 | 2.740944000  |
| 6 | 2.831000000  | -1.986559000 | 2.787461000  |
| 1 | 2.054044000  | -3.815221000 | 1.963299000  |
| 1 | 0.536001000  | -2.678283000 | 0.354403000  |
| 1 | 3.453211000  | -0.012090000 | 3.402512000  |
| 1 | 3.488432000  | -2.493042000 | 3.490423000  |
| 6 | 0.352363000  | 0.189988000  | 0.037146000  |
| 6 | 0.492034000  | 1.595829000  | 0.725067000  |
| 6 | 1.812836000  | 1.441267000  | 1.459044000  |
| 1 | 0.874304000  | 0.221022000  | -0.931532000 |
| 6 | 2.658145000  | 2.467951000  | 1.220126000  |
| 6 | -0.670487000 | 1.853958000  | 1.696638000  |
| 6 | -1.865949000 | 2.427717000  | 1.243854000  |
| 6 | -0.607480000 | 1.476858000  | 3.041202000  |

|    |              |              |              |
|----|--------------|--------------|--------------|
| 6  | -2.955086000 | 2.607909000  | 2.087792000  |
| 1  | -1.955697000 | 2.742981000  | 0.207426000  |
| 6  | -1.697433000 | 1.654003000  | 3.892874000  |
| 1  | 0.303767000  | 1.037698000  | 3.439131000  |
| 6  | -2.877076000 | 2.219208000  | 3.423073000  |
| 1  | -3.869194000 | 3.049275000  | 1.691862000  |
| 1  | -1.613525000 | 1.351822000  | 4.935225000  |
| 6  | 2.006251000  | 3.361786000  | 0.258066000  |
| 6  | 2.515026000  | 4.490335000  | -0.374429000 |
| 6  | 0.770478000  | 2.806965000  | -0.136139000 |
| 6  | 1.792587000  | 5.055464000  | -1.425382000 |
| 1  | 3.473414000  | 4.912455000  | -0.074869000 |
| 6  | 0.071609000  | 3.363417000  | -1.193902000 |
| 1  | 3.658352000  | -0.661796000 | 0.449987000  |
| 6  | 0.591836000  | 4.489278000  | -1.841137000 |
| 1  | 2.180981000  | 5.933167000  | -1.937691000 |
| 1  | -0.851368000 | 2.911787000  | -1.557347000 |
| 1  | 0.056789000  | 4.919433000  | -2.685061000 |
| 79 | -1.638546000 | -0.395133000 | -0.304164000 |
| 15 | -3.998561000 | -0.754190000 | -0.422308000 |
| 6  | -4.708102000 | -1.817018000 | -1.720578000 |
| 6  | -4.812593000 | 0.868476000  | -0.633831000 |
| 6  | -4.656860000 | -1.389825000 | 1.155293000  |
| 6  | -5.988896000 | -1.605576000 | -2.239696000 |
| 6  | -3.945672000 | -2.895576000 | -2.177678000 |
| 6  | -5.925861000 | 1.265620000  | 0.109219000  |
| 6  | -4.252621000 | 1.753332000  | -1.561668000 |
| 6  | -5.729350000 | -2.280080000 | 1.236643000  |
| 6  | -4.058080000 | -0.916685000 | 2.328627000  |
| 6  | -6.502701000 | -2.471004000 | -3.198597000 |
| 1  | -6.582441000 | -0.760265000 | -1.892784000 |
| 6  | -4.465352000 | -3.762394000 | -3.132524000 |
| 1  | -2.939752000 | -3.044586000 | -1.784792000 |
| 6  | -6.471724000 | 2.532962000  | -0.076590000 |
| 1  | -6.359720000 | 0.587070000  | 0.842456000  |
| 6  | -4.797810000 | 3.018061000  | -1.743667000 |
| 1  | -3.372118000 | 1.447948000  | -2.129075000 |
| 6  | -6.198578000 | -2.689710000 | 2.481646000  |
| 1  | -6.195652000 | -2.657159000 | 0.327407000  |
| 6  | -4.540227000 | -1.316951000 | 3.568023000  |
| 1  | -3.214669000 | -0.226470000 | 2.275660000  |
| 6  | -5.742616000 | -3.549769000 | -3.642584000 |
| 1  | -7.498077000 | -2.302256000 | -3.602836000 |
| 1  | -3.868284000 | -4.599774000 | -3.485209000 |

|                                              |              |              |                             |
|----------------------------------------------|--------------|--------------|-----------------------------|
| 6                                            | -5.907673000 | 3.409688000  | -0.998063000                |
| 1                                            | -7.337913000 | 2.837481000  | 0.506384000                 |
| 1                                            | -4.351604000 | 3.703030000  | -2.460864000                |
| 6                                            | -5.608345000 | -2.206935000 | 3.645672000                 |
| 1                                            | -7.029534000 | -3.388827000 | 2.541134000                 |
| 1                                            | -4.069356000 | -0.933820000 | 4.471038000                 |
| 1                                            | -6.145640000 | -4.224455000 | -4.394311000                |
| 1                                            | -6.330903000 | 4.402274000  | -1.133371000                |
| 1                                            | -5.979347000 | -2.530043000 | 4.615694000                 |
| 8                                            | 5.819634000  | -0.250581000 | 1.849422000                 |
| 16                                           | 5.992495000  | -0.689712000 | 0.483505000                 |
| 9                                            | 6.502846000  | -3.021297000 | -0.609032000                |
| 9                                            | 7.545054000  | -2.588065000 | 1.231488000                 |
| 9                                            | 5.450842000  | -3.118917000 | 1.269601000                 |
| 6                                            | 6.394547000  | -2.497390000 | 0.589754000                 |
| 8                                            | 5.196080000  | -1.436766000 | -2.532398000                |
| 8                                            | 2.726959000  | -1.317500000 | -1.912207000                |
| 16                                           | 4.084009000  | -0.828794000 | -1.846097000                |
| 9                                            | 3.009770000  | 1.534909000  | -1.797208000                |
| 9                                            | 5.157743000  | 1.545446000  | -2.011593000                |
| 9                                            | 3.907916000  | 0.968520000  | -3.678516000                |
| 6                                            | 4.039840000  | 0.946801000  | -2.366565000                |
| 7                                            | 4.455284000  | -0.684534000 | -0.205454000                |
| 8                                            | 6.929158000  | -0.101218000 | -0.439953000                |
| 6                                            | 4.089669000  | 2.598106000  | 1.601087000                 |
| 1                                            | 4.415882000  | 1.796538000  | 2.269486000                 |
| 1                                            | 4.727046000  | 2.562216000  | 0.702693000                 |
| 1                                            | 4.294122000  | 3.557047000  | 2.094756000                 |
| 1                                            | -3.727055000 | 2.356561000  | 4.088489000                 |
| Zero-point correction=                       |              |              | 0.671713 (Hartree/Particle) |
| Thermal correction to Energy=                |              |              | 0.723679                    |
| Thermal correction to Enthalpy=              |              |              | 0.724623                    |
| Thermal correction to Gibbs Free Energy=     |              |              | 0.581568                    |
| Sum of electronic and zero-point Energies=   |              |              | -3883.849286                |
| Sum of electronic and thermal Energies=      |              |              | -3883.797320                |
| Sum of electronic and thermal Enthalpies=    |              |              | -3883.796376                |
| Sum of electronic and thermal Free Energies= |              |              | -3883.939431                |

#### B-TSa5

|   |             |              |              |
|---|-------------|--------------|--------------|
| 6 | 0.630415000 | -2.088278000 | -4.336689000 |
| 6 | 0.664976000 | -1.185142000 | -3.272504000 |
| 6 | 1.452553000 | -1.472072000 | -2.164675000 |
| 6 | 2.236586000 | -2.645947000 | -2.144527000 |
| 6 | 2.201195000 | -3.540674000 | -3.210943000 |

|    |              |              |              |
|----|--------------|--------------|--------------|
| 6  | 1.381970000  | -3.260436000 | -4.301829000 |
| 1  | 0.014124000  | -1.868023000 | -5.205479000 |
| 1  | 0.105485000  | -0.251745000 | -3.323102000 |
| 1  | 2.802677000  | -4.447826000 | -3.194821000 |
| 1  | 1.338508000  | -3.955450000 | -5.137380000 |
| 6  | 1.726523000  | -0.626986000 | -0.925762000 |
| 6  | 2.423732000  | -1.641729000 | 0.047946000  |
| 6  | 3.061752000  | -2.589363000 | -0.950515000 |
| 1  | 2.514509000  | 0.080377000  | -1.242761000 |
| 6  | 4.364127000  | -2.824413000 | -0.674972000 |
| 6  | 1.422392000  | -2.375007000 | 0.951721000  |
| 6  | 0.829054000  | -1.702685000 | 2.030136000  |
| 6  | 1.048481000  | -3.702449000 | 0.723807000  |
| 6  | -0.123776000 | -2.323880000 | 2.830250000  |
| 1  | 1.096341000  | -0.668898000 | 2.237083000  |
| 6  | 0.099733000  | -4.329519000 | 1.531356000  |
| 1  | 1.502514000  | -4.257199000 | -0.093918000 |
| 6  | -0.498051000 | -3.641677000 | 2.581111000  |
| 1  | -0.578720000 | -1.768011000 | 3.648582000  |
| 1  | -0.172121000 | -5.364541000 | 1.330556000  |
| 6  | 4.736700000  | -1.976768000 | 0.462334000  |
| 6  | 5.974921000  | -1.794969000 | 1.068223000  |
| 6  | 3.627716000  | -1.196394000 | 0.852909000  |
| 6  | 6.108076000  | -0.813731000 | 2.050932000  |
| 1  | 6.835842000  | -2.390976000 | 0.768607000  |
| 6  | 3.765372000  | -0.232887000 | 1.835530000  |
| 1  | 1.270289000  | 0.723790000  | -0.521143000 |
| 6  | 5.018733000  | -0.032723000 | 2.422007000  |
| 1  | 7.075644000  | -0.650375000 | 2.520792000  |
| 1  | 2.924787000  | 0.386548000  | 2.139311000  |
| 1  | 5.136527000  | 0.750307000  | 3.168598000  |
| 79 | -0.477850000 | -0.386637000 | -0.315598000 |
| 15 | -2.711601000 | -0.377087000 | 0.338368000  |
| 6  | -3.669936000 | 0.972846000  | -0.415457000 |
| 6  | -2.835806000 | -0.167034000 | 2.140826000  |
| 6  | -3.600202000 | -1.911718000 | -0.050173000 |
| 6  | -4.393326000 | 1.895630000  | 0.340366000  |
| 6  | -3.638393000 | 1.085827000  | -1.808925000 |
| 6  | -3.568827000 | -1.041143000 | 2.945341000  |
| 6  | -2.114650000 | 0.880093000  | 2.725383000  |
| 6  | -4.989794000 | -1.928468000 | -0.201717000 |
| 6  | -2.874726000 | -3.104060000 | -0.112510000 |
| 6  | -5.072484000 | 2.930837000  | -0.296363000 |
| 1  | -4.418089000 | 1.813185000  | 1.425243000  |

|                               |              |              |                             |
|-------------------------------|--------------|--------------|-----------------------------|
| 6                             | -4.324173000 | 2.114715000  | -2.439610000                |
| 1                             | -3.057000000 | 0.373264000  | -2.394951000                |
| 6                             | -3.577792000 | -0.866561000 | 4.326396000                 |
| 1                             | -4.121833000 | -1.864299000 | 2.495830000                 |
| 6                             | -2.127396000 | 1.049447000  | 4.103232000                 |
| 1                             | -1.525654000 | 1.556849000  | 2.107211000                 |
| 6                             | -5.647274000 | -3.134822000 | -0.412719000                |
| 1                             | -5.553879000 | -0.997546000 | -0.152820000                |
| 6                             | -3.539424000 | -4.308620000 | -0.313394000                |
| 1                             | -1.790064000 | -3.089065000 | 0.005531000                 |
| 6                             | -5.037063000 | 3.041489000  | -1.681530000                |
| 1                             | -5.626893000 | 3.654961000  | 0.295381000                 |
| 1                             | -4.291603000 | 2.202652000  | -3.522875000                |
| 6                             | -2.857538000 | 0.174106000  | 4.904799000                 |
| 1                             | -4.147524000 | -1.549664000 | 4.951879000                 |
| 1                             | -1.554241000 | 1.859442000  | 4.547338000                 |
| 6                             | -4.922669000 | -4.323189000 | -0.465543000                |
| 1                             | -6.727512000 | -3.148381000 | -0.535410000                |
| 1                             | -2.971532000 | -5.235156000 | -0.357546000                |
| 1                             | -5.561871000 | 3.856008000  | -2.175021000                |
| 1                             | -2.860887000 | 0.301593000  | 5.984760000                 |
| 1                             | -5.440029000 | -5.265573000 | -0.630186000                |
| 8                             | 1.853157000  | 2.140860000  | -2.758341000                |
| 16                            | 1.258411000  | 2.971728000  | -1.729195000                |
| 9                             | -1.290884000 | 3.366728000  | -1.146171000                |
| 9                             | -0.695721000 | 3.933604000  | -3.142340000                |
| 9                             | -0.918602000 | 1.848721000  | -2.632224000                |
| 6                             | -0.541522000 | 3.043109000  | -2.180083000                |
| 8                             | 0.180619000  | 3.826570000  | 1.238436000                 |
| 8                             | 0.976683000  | 1.585151000  | 2.049314000                 |
| 16                            | 1.115674000  | 2.722779000  | 1.148862000                 |
| 9                             | 3.727673000  | 2.806135000  | 0.772222000                 |
| 9                             | 2.833812000  | 4.712729000  | 1.237725000                 |
| 9                             | 3.074501000  | 3.226254000  | 2.782423000                 |
| 6                             | 2.817227000  | 3.425668000  | 1.498233000                 |
| 7                             | 1.255237000  | 2.072835000  | -0.353167000                |
| 8                             | 1.673960000  | 4.338941000  | -1.491978000                |
| 1                             | -1.249334000 | -4.125134000 | 3.202687000                 |
| 6                             | 5.335238000  | -3.623195000 | -1.476561000                |
| 1                             | 5.628106000  | -3.087381000 | -2.389854000                |
| 1                             | 6.250517000  | -3.831741000 | -0.912179000                |
| 1                             | 4.916773000  | -4.586458000 | -1.784937000                |
| Zero-point correction=        |              |              | 0.665455 (Hartree/Particle) |
| Thermal correction to Energy= |              |              | 0.716267                    |

|                                              |              |
|----------------------------------------------|--------------|
| Thermal correction to Enthalpy=              | 0.717211     |
| Thermal correction to Gibbs Free Energy=     | 0.579635     |
| Sum of electronic and zero-point Energies=   | -3883.833125 |
| Sum of electronic and thermal Energies=      | -3883.782314 |
| Sum of electronic and thermal Enthalpies=    | -3883.781370 |
| Sum of electronic and thermal Free Energies= | -3883.918945 |
